# Supplementary material
Source: PubMed Central journal article supplement (PMC3697074)

# Synthesis and evaluation of 7-substituted 4-aminoquinoline analogs for antimalarial activity

Jong Yeon Hwang,<sup>1</sup> Takashi Kawasuji,<sup>1,2</sup> David J. Lowes,<sup>1</sup> Julie A. Clark,<sup>1</sup> Michele C. Connelly,<sup>1</sup> Fangyi Zhu,<sup>1</sup> W. Armand Guiguemde<sup>1</sup> Martina S. Sigal,<sup>1</sup> Emily B. Wilson,<sup>3</sup> Joseph L. DeRisi,<sup>3</sup> and R. Kiplin Guy<sup>1,\*</sup>

R. Kiplin Guy, St Jude Children's Research Hospital, Department of Chemical Biology and Therapeutics, 262 Danny Thomas Place, Memphis TN, 38105-3678, USA. Tel (901) 595-5714; Fax (901) 595-5715 e-mail: kip.guy@stjude.org

<sup>1</sup>Department of Chemical Biology and Therapeutics, St. Jude Children's Research Hospital, 262 Danny Thomas Place, Memphis, TN 38105, USA

<sup>2</sup>Medicinal Research Laboratories, Shionogi & CO., LTD. 12-4, Sagisu 5-chome, Fukushima-ku, Osaka, Japan

<sup>3</sup>Department of Biochemistry and Biophysics, University of California at San Francisco, 600 16<sup>th</sup> Street, San Francisco, CA 94143, USA

## Supporting Information

### Table of Contents

|                                                                             |           |
|-----------------------------------------------------------------------------|-----------|
| SI-Table 1. Biological and pharmacological evaluation for diarylethers..... | S2        |
| SI-Table 2 Biological and pharmacological evaluation for biaryls.....       | S3        |
| SI-Table 3. Biological and pharmacological evaluation for akylaryls.....    | S4        |
| Tabulated Spectral and Purity Data .....                                    | S7 - S21  |
| Raw Spectral and Purity Data .....                                          | S22 - S96 |

**SI-Table 1. Biological and pharmacological evaluation for diarylethers.**

| SAMPLE        | No.<br>3{x,y,z} | R <sub>1</sub> | R <sub>2</sub> | 3D7 <sup>a</sup><br>EC <sub>50</sub> , μM | K1 <sup>a</sup><br>EC <sub>50</sub> , μM | K1/3D7 | HepG2 <sup>b</sup><br>EC <sub>50</sub> , μM | HEK293 <sup>b</sup><br>EC <sub>50</sub> , μM | Raji <sup>b</sup><br>EC <sub>50</sub> , μM | BJ <sup>b</sup><br>EC <sub>50</sub> , μM | HepG2<br>/3D7 | HepG2<br>/K1 | Avg. Sol <sup>b</sup><br>μM | Avg. Pe <sup>b</sup><br>X 10 <sup>6</sup> cm/s | ALogP <sup>b</sup> | pKa1 <sup>b</sup><br>(ring) | pKa2 <sup>b</sup><br>(chain) |
|---------------|-----------------|----------------|----------------|-------------------------------------------|------------------------------------------|--------|---------------------------------------------|----------------------------------------------|--------------------------------------------|------------------------------------------|---------------|--------------|-----------------------------|------------------------------------------------|--------------------|-----------------------------|------------------------------|
| SJ000311206-1 | 3{1,1,1}        | PhO            | Furfuryl       | 0.314±0.013                               | 6.0±0.1                                  | 19.0   | >16                                         | >16                                          | >16                                        | >16                                      | 50.9          | 2.5          | 37.8±2.4                    | 1016±223                                       | 3.81               | 8.6                         | 9.28                         |
| SJ000311207-1 | 3{1,1,2}        | PhO            | 2-HO-3-MeO-Bn  | 0.015±0.002                               | 1.8±2.0                                  | 122.0  | 9.0±0.9                                     | >16                                          | >16                                        | >16                                      | 595.1         | 3.7          | 39.5±1.3                    | 1002±107                                       | 4.38               | 7.83                        | 9.28                         |
| SJ000311208-1 | 3{1,1,3}        | PhO            | Piperonyl      | 0.018±0.002                               | 0.078±0.109                              | 4.3    | 1.3±0.2                                     | >16                                          | 7.8±1.3                                    | 4.8±2.9                                  | 71.7          | 34.2         | 41.0±0.7                    | 1376±155                                       | 4.4                | 8.15                        | 9.28                         |
| SJ000311209-1 | 3{1,1,4}        | PhO            | 3-F-6-MeO-Bn   | 0.162±0.016                               | 0.138±0.014                              | 0.9    | 0.8±0.2                                     | 4.6±1.6                                      | 2.8±0.3                                    | 3.1±3.1                                  | 5.2           | 11.1         | 42.7±0.9                    | 1228±245                                       | 4.82               | 8.11                        | 9.28                         |
| SJ000311210-1 | 3{1,2,1}        | 2-MeO-PhO      | Furfuryl       | 0.001±0.003                               | 0.087±0.867                              | 66.9   | 2.9±0.5                                     | >16                                          | 8.8±1.3                                    | 13.7±5.6                                 | 2218.8        | 74.9         | 38.8±0.6                    | 521±146                                        | 3.8                | 8.6                         | 9.28                         |
| SJ000311211-1 | 3{1,2,2}        | 2-MeO-PhO      | 2-HO-3-MeO-Bn  | 0.009±0.085                               | 5.7±7.4                                  | 626.4  | 15.4±1.6                                    | >16                                          | >16                                        | >16                                      | 1694.7        | 2.0          | 42.9±2.7                    | 318±68                                         | 4.36               | 7.83                        | 9.28                         |
| SJ000311212-1 | 3{1,2,3}        | 2-MeO-PhO      | Piperonyl      | 0.014±0.015                               | 0.517±0.583                              | 37.7   | 6.1±0.8                                     | >16                                          | >16                                        | 15.3±3.5                                 | 448.7         | 11.3         | 43.4±0.9                    | 1031±72                                        | 4.38               | 8.15                        | 9.28                         |
| SJ000311213-1 | 3{1,2,4}        | 2-MeO-PhO      | 3-F-6-MeO-Bn   | 0.022±0.024                               | 0.960±1.882                              | 44.0   | 8.4±4.4                                     | >16                                          | >16                                        | >16                                      | 385.9         | 6.7          | 44.5±1.9                    | 696±102                                        | 4.81               | 8.11                        | 9.28                         |
| SJ000311214-1 | 3{1,3,1}        | 3-MeO-PhO      | Furfuryl       | 0.009±0.021                               | 0.153±0.279                              | 17.4   | 8.2±1.4                                     | >16                                          | >16                                        | >16                                      | 929.9         | 101.6        | 40.6±0.2                    | 698±68                                         | 3.8                | 8.6                         | 9.28                         |
| SJ000311215-1 | 3{1,3,2}        | 3-MeO-PhO      | 2-HO-3-MeO-Bn  | 0.018±0.002                               | 3.0±3.1                                  | 42.0   | >16                                         | >16                                          | >16                                        | >16                                      | 888.9         | 1.8          | 44.0±1.0                    | 329±134                                        | 4.36               | 7.83                        | 9.28                         |
| SJ000311216-1 | 3{1,3,3}        | 3-MeO-PhO      | Piperonyl      | 0.162±0.016                               | 0.600±0.800                              | 50.0   | >16                                         | >16                                          | >16                                        | >16                                      | 98.8          | 23.6         | 42.6±0.3                    | 1012±33                                        | 4.38               | 8.15                        | 9.28                         |
| SJ000311217-1 | 3{1,3,4}        | 3-MeO-PhO      | 3-F-6-MeO-Bn   | 2.4±0.1                                   | 0.296±0.678                              | 0.1    | 6.9±1.1                                     | >16                                          | 12.1±0.7                                   | 14.9±2.4                                 | 2.9           | 24.0         | 46.0±1.1                    | 943±83                                         | 4.81               | 8.11                        | 9.28                         |
| SJ000311218-1 | 3{1,4,1}        | 4-MeO-PhO      | Furfuryl       | 0.004±0.001                               | 0.020±0.026                              | 5.6    | 2.8±1.0                                     | >16                                          | 9.2±1.5                                    | 9.6±5.0                                  | 776.5         | 264.9        | 38.3±0.4                    | 588±70                                         | 3.8                | 8.6                         | 9.28                         |
| SJ000311219-1 | 3{1,4,2}        | 4-MeO-PhO      | 2-HO-3-MeO-Bn  | 0.004±0.002                               | 0.375±0.404                              | 91.5   | 4.3±0.8                                     | >16                                          | 9.3±0.7                                    | 15.5±7.2                                 | 1044.3        | 14.7         | 42.3±1.2                    | 612±225                                        | 4.36               | 7.83                        | 9.28                         |
| SJ000311220-1 | 3{1,4,3}        | 4-MeO-PhO      | Piperonyl      | 0.046±0.226                               | 1.4±2.8                                  | 30.9   | 8.6±1.3                                     | >16                                          | >16                                        | 15.9±0.4                                 | 187.2         | 5.6          | 43.3±2.8                    | 989±193                                        | 4.38               | 8.15                        | 9.28                         |
| SJ000311221-1 | 3{1,4,4}        | 4-MeO-PhO      | 3-F-6-MeO-Bn   | 0.054±0.005                               | 0.660±1.793                              | 12.2   | 9.1±3.0                                     | >16                                          | >16                                        | 15.6±4.7                                 | 169.1         | 10.6         | 42.6±1.6                    | 566±88                                         | 4.81               | 8.11                        | 9.28                         |
| SJ000311222-1 | 3{1,5,1}        | 4-F-PhO        | Furfuryl       | 0.026±0.075                               | 0.096±0.01                               | 3.6    | >16                                         | >16                                          | >16                                        | >16                                      | 610.7         | 167.4        | 37.1±0.8                    | 1177±173                                       | 4.02               | 8.6                         | 9.28                         |
| SJ000311223-1 | 3{1,5,2}        | 4-F-PhO        | 2-HO-3-MeO-Bn  | 0.011±0.002                               | 3.1±3.4                                  | 282.2  | 13.9±2.8                                    | >16                                          | >16                                        | >16                                      | 1254.5        | 3.5          | 40.9±0.4                    | 1016±165                                       | 4.58               | 7.83                        | 9.28                         |
| SJ000311224-1 | 3{1,5,3}        | 4-F-PhO        | Piperonyl      | 0.015±0.002                               | 0.667±0.760                              | 44.5   | >16                                         | >16                                          | >16                                        | >16                                      | 1066.7        | 24.0         | 40.6±0.6                    | 702±189                                        | 4.61               | 8.15                        | 9.28                         |
| SJ000311225-1 | 3{1,5,4}        | 4-F-PhO        | 3-F-6-MeO-Bn   | 0.297±1.065                               | 0.135±0.014                              | 0.5    | 8.6±3.4                                     | >16                                          | >16                                        | >16                                      | 28.8          | 48.8         | 42.2±1.1                    | 1310±205                                       | 5.03               | 8.11                        | 9.28                         |
| SJ000311226-1 | 3{1,6,1}        | 4-Cl-PhO       | Furfuryl       | 0.040±0.049                               | 0.793±1.115                              | 19.8   | 10.1±1.4                                    | >16                                          | >16                                        | >16                                      | 252.6         | 9.8          | 35.7±1.1                    | 1032±121                                       | 4.48               | 8.6                         | 9.28                         |
| SJ000311227-1 | 3{1,6,2}        | 4-Cl-PhO       | Furfuryl       | 0.011±0.003                               | 0.785±0.849                              | 70.7   | 6.8±1.1                                     | >16                                          | 15.0±0.5                                   | 15.4±2.5                                 | 612.6         | 7.3          | 42.8±1.5                    | 777±156                                        | 5.04               | 7.83                        | 9.28                         |
| SJ000311228-1 | 3{1,6,3}        | 4-Cl-PhO       | Piperonyl      | 0.038±0.040                               | 0.320±0.650                              | 8.4    | 8.8±2.4                                     | >16                                          | >16                                        | >16                                      | 231.4         | 22.5         | 40.8±2.1                    | 1102±153                                       | 5.07               | 8.15                        | 9.28                         |
| SJ000311229-1 | 3{1,6,4}        | 4-Cl-PhO       | 3-F-6-MeO-Bn   | 0.031±0.060                               | 0.109±0.196                              | 3.5    | 6.1±0.3                                     | >16                                          | >16                                        | >16                                      | 193.4         | 41.2         | 41.8±2.5                    | 1284±65                                        | 5.49               | 8.11                        | 9.28                         |
| SJ000311230-1 | 3{1,7,1}        | 3-Me2N-PhO     | Furfuryl       | 0.027±0.341                               | 0.155±0.242                              | 5.7    | >16                                         | >16                                          | >16                                        | >16                                      | 588.2         | 103.0        | 33.7±0.8                    | 906±51                                         | 3.98               | 8.6                         | 9.28                         |
| SJ000311231-1 | 3{1,7,2}        | 3-Me2N-PhO     | 2-HO-3-MeO-Bn  | 0.010±0.241                               | 2.0±2.1                                  | 215.1  | 10.9±0.8                                    | >16                                          | >16                                        | >16                                      | 1144.4        | 3.6          | 40.0±2.1                    | 347±56                                         | 4.54               | 7.83                        | 9.28                         |
| SJ000311232-1 | 3{1,7,3}        | 3-Me2N-PhO     | Piperonyl      | 1.4±0.7                                   | 3.9±7.8                                  | 2.9    | >16                                         | >16                                          | >16                                        | 5.9±5.1                                  | 11.7          | 4.1          | 39.2±0.5                    | 584±74                                         | 4.56               | 8.15                        | 9.28                         |
| SJ000311233-1 | 3{1,7,4}        | 3-Me2N-PhO     | 3-F-6-MeO-Bn   | 0.007±0.005                               | 0.031±0.326                              | 4.7    | 2.0±0.1                                     | >16                                          | 3.4±0.3                                    | 5.1±0.5                                  | 305.0         | 109.6        | 39.1±1.1                    | 579±16                                         | 4.99               | 8.11                        | 9.28                         |
| SJ000311234-1 | 3{1,8,1}        | 4-tertBu-PhO   | Furfuryl       | 1.1±0.2                                   | 4.8±8.4                                  | 4.3    | 3.9±0.8                                     | >16                                          | 10.7±0.7                                   | >16                                      | 3.5           | 0.6          | 30.6±1.5                    | 1049±44                                        | 5.22               | 8.6                         | 9.28                         |
| SJ000311235-1 | 3{1,8,2}        | 4-tertBu-PhO   | 2-HO-3-MeO-Bn  | 0.054±0.021                               | 0.249±0.277                              | 4.6    | 1.2±0.3                                     | >16                                          | 3.0±0.8                                    | 4.8±1.5                                  | 22.9          | 6.1          | 27.4±0.2                    | 644±135                                        | 5.78               | 7.83                        | 9.28                         |
| SJ000311236-1 | 3{1,8,3}        | 4-tertBu-PhO   | Piperonyl      | 0.137±0.031                               | 2.5±3.1                                  | 17.9   | 1.2±0.4                                     | 15.3±0.5                                     | 8.9±3.1                                    | >16                                      | 8.9           | 0.4          | 14.5±0.4                    | 1054±380                                       | 5.8                | 8.15                        | 9.28                         |
| SJ000311237-1 | 3{1,8,4}        | 4-tertBu-PhO   | 3-F-6-MeO-Bn   | 0.106±0.046                               | 2.8±4.0                                  | 26.2   | 8.8±0.4                                     | >16                                          | 10.1±1.9                                   | >16                                      | 83.0          | 2.6          | 23.1±1.1                    | 917±240                                        | 6.22               | 8.11                        | 9.28                         |

<sup>a</sup>Values are the mean of three independent experiments in triplicate. <sup>b</sup>Values are means of an experiment in triplicate. <sup>c</sup>pKa and Alog P was calculated by

Pipeline pilot of Accelrys Software Inc.

**SI-Table 2 Biological and pharmacological evaluation for biaryls.**

| SAMPLE        | No.<br>3{x,y,z} | R <sub>1</sub> | R <sub>2</sub> | 3D7 <sup>a</sup>      | K1 <sup>a</sup>       | K1/3D7 | HepG2 <sup>b</sup>    | HEK293 <sup>b</sup>   | Raji <sup>b</sup>     | BJ <sup>b</sup>       | HepG2                 | HepG2                 | Avg. Sol <sup>b</sup> | Avg. Pe <sup>b</sup> | AlogP <sup>b</sup> | pKa1 <sup>b</sup> | pKa2 <sup>b</sup>      |
|---------------|-----------------|----------------|----------------|-----------------------|-----------------------|--------|-----------------------|-----------------------|-----------------------|-----------------------|-----------------------|-----------------------|-----------------------|----------------------|--------------------|-------------------|------------------------|
|               |                 |                |                | EC <sub>50</sub> , μM | EC <sub>50</sub> , μM |        | EC <sub>50</sub> , μM | /3D7                  | /K1                  |                    | μM                | X 10 <sup>6</sup> cm/s |
| SJ000311238-1 | 3{2,1,1}        | 4-F-Ph         | Furfuryl       | 0.032±0.043           | 0.069±0.098           | 2.1    | 9.7±1.1               | >16                   | >16                   | >16                   | 299.4                 | 113.2                 | 35.9±0.3              | 340±35               | 3.98               | 8.6               | 9.47                   |
| SJ000311239-1 | 3{2,1,2}        | 4-F-Ph         | 2-HO-3-MeO-Bn  | 0.009±0.084           | 0.85±1.23             | 92.8   | 9.4±2.5               | >16                   | >16                   | >16                   | 1020.6                | 8.0                   | 40.7±2.1              | 269±59               | 4.54               | 7.83              | 9.47                   |
| SJ000311240-1 | 3{2,1,3}        | 4-F-Ph         | Piperonyl      | 0.018±0.009           | 0.035±0.004           | 2.0    | 12.0±5.5              | >16                   | >16                   | >16                   | 678.6                 | 252.0                 | 41.5±1.8              | 1130±89              | 4.57               | 8.15              | 9.47                   |
| SJ000311241-1 | 3{2,1,4}        | 4-F-Ph         | 3-F-6-MeO-Bn   | 0.018±0.0112          | 0.097±0.107           | 5.5    | 1.0±0.2               | >16                   | >16                   | 15.5±2.8              | 56.9                  | 7.9                   | 40.1±1.5              | 997±66               | 4.99               | 8.11              | 9.47                   |
| SJ000311270-1 | 3{2,2,1}        | 3,5-CF3-Ph     | Furfuryl       | 0.285±0.164           | 0.972±1.41            | 3.4    | 3.0±0.2               | 15.3±0.3              | 8.6±0.4               | 5.3±1.2               | 10.7                  | 2.5                   | 40.1±1.0              | 818±121              | 5.66               | 8.6               | 9.47                   |
| SJ000311271-1 | 3{2,2,2}        | 3,5-CF3-Ph     | 2-HO-3-MeO-Bn  | 0.029±0.008           | 0.209±1.74            | 7.2    | 1.2±0.4               | 12.1±2.9              | 3.6±0.8               | 5.5±1.7               | 42.8                  | 4.5                   | 37.2±1.0              | 237±173              | 6.22               | 7.83              | 9.47                   |
| SJ000311272-1 | 3{2,2,3}        | 3,5-CF3-Ph     | Piperonyl      | 0.284±0.170           | 0.604±0.68            | 2.1    | 1.4±0.5               | 6.4±1.3               | 1.8±0.3               | 4.8±1.1               | 4.9                   | 1.9                   | 39.2±1.2              | 1477±127             | 6.24               | 8.15              | 9.47                   |
| SJ000311273-1 | 3{2,2,4}        | 3,5-CF3-Ph     | 3-F-6-MeO-Bn   | 0.092±0.105           | 0.81±0.98             | 8.8    | 1.0±0.1               | >16                   | 2.2±0.2               | 7.2±5.8               | 10.5                  | 1.1                   | 37.7±0.4              | 1380±47              | 6.67               | 8.11              | 9.47                   |
| SJ000311274-1 | 3{2,3,1}        | 1-Naphtyl      | Furfuryl       | 0.031±0.006           | 1.3±1.3               | 41.2   | 8.1±1.8               | >16                   | >16                   | >16                   | 258.5                 | 4.3                   | 37.6±0.5              | 1400±214             | 4.68               | 8.6               | 9.47                   |
| SJ000311275-1 | 3{2,3,2}        | 1-Naphtyl      | 2-HO-3-MeO-Bn  | 0.033±0.004           | 1.1±1.1               | 33.9   | 3.7±0.7               | >16                   | 10.6±0.4              | >16                   | 112.0                 | 2.3                   | 42.4±0.4              | 476±130              | 5.24               | 7.83              | 9.47                   |
| SJ000311276-1 | 3{2,3,3}        | 1-Naphtyl      | Piperonyl      | 0.598±2.558           | 0.54±0.79             | 0.9    | 6.9±0.7               | >16                   | 11.7±0.3              | >16                   | 11.5                  | 12.2                  | 41.7±0.7              | 1228±47              | 5.27               | 8.15              | 9.47                   |
| SJ000311277-1 | 3{2,3,4}        | 1-Naphtyl      | 3-F-6-MeO-Bn   | 1.2±0.2               | 1.0±2.2               | 0.9    | >16                   | >16                   | >16                   | >16                   | 13.9                  | 15.5                  | 41.0±1.1              | 1056±238             | 5.69               | 8.11              | 9.47                   |
| SJ000311278-1 | 3{2,4,1}        | 4-CF3-Ph       | Furfuryl       | 0.020±0.002           | 0.22±1.01             | 11.0   | 6.8±4.8               | >16                   | 12.9±1.2              | 15.3±5.3              | 332.9                 | 15.5                  | 34.4±0.3              | 1917±203             | 4.72               | 8.6               | 9.47                   |
| SJ000311279-1 | 3{2,4,2}        | 4-CF3-Ph       | 2-HO-3-MeO-Bn  | 0.013±0.014           | 0.024±0.041           | 1.8    | 4.2±3.2               | 11.8±0.6              | 4.2±1.2               | >16                   | 312.4                 | 91.0                  | 38.6±0.6              | 822±286              | 5.28               | 7.83              | 9.47                   |
| SJ000311280-1 | 3{2,4,3}        | 4-CF3-Ph       | Piperonyl      | 0.025±0.003           | 0.098±0.131           | 3.9    | 3.3±0.3               | >16                   | 8.3±0.5               | 15.6±3.9              | 132.4                 | 19.2                  | 37.7±1.3              | 1389±212             | 5.3                | 8.15              | 9.47                   |
| SJ000311281-1 | 3{2,4,4}        | 4-CF3-Ph       | 3-F-6-MeO-Bn   | 0.054±0.004           | 0.089±0.098           | 1.7    | 8.1±1.3               | >16                   | 11.4±0.7              | >16                   | 150.5                 | 58.4                  | 39.9±1.8              | 1266±129             | 5.72               | 8.11              | 9.47                   |
| SJ000311282-1 | 3{2,5,1}        | Ph             | Furfuryl       | 0.020±0.001           | 0.13±0.14             | 6.3    | 8.1±2.9               | >16                   | >16                   | >16                   | 398.9                 | 46.4                  | 36.2±2.4              | 1795±215             | 3.77               | 8.6               | 9.47                   |
| SJ000311283-1 | 3{2,5,2}        | Ph             | 2-HO-3-MeO-Bn  | 0.009±0.061           | 1.9±2.1               | 212.7  | 3.9±0.5               | >16                   | 15.3±0.8              | 13.6±6.8              | 429.7                 | 1.7                   | 42.1±0.7              | 445±164              | 4.33               | 7.83              | 9.47                   |
| SJ000311284-1 | 3{2,5,3}        | Ph             | Piperonyl      | 0.017±0.002           | 0.029±0.208           | 1.7    | 4.7±0.4               | >16                   | 9.1±0.3               | 5.9±1.5               | 269.9                 | 138.9                 | 41.8±1.5              | 1606±493             | 4.36               | 8.15              | 9.47                   |
| SJ000311285-1 | 3{2,5,4}        | Ph             | 3-F-6-MeO-Bn   | 0.011±0.004           | 0.045±0.082           | 4.2    | 3.5±0.2               | >16                   | 11.7±0.3              | 14.9±2.2              | 327.4                 | 66.3                  | 40.7±0.4              | 1204±251             | 4.78               | 8.11              | 9.47                   |
| SJ000311286-1 | 3{2,6,1}        | 4-tertBu-Ph    | Furfuryl       | 0.704±0.363           | 0.33±0.57             | 0.5    | 3.9±1.3               | >16                   | 8.9±1.5               | 15.9±5.6              | 5.5                   | 9.7                   | 37.8±0.9              | 2059±532             | 5.17               | 8.6               | 9.47                   |

|               |          |             |               |             |             |      |         |          |          |           |       |       |          |          |      |      |      |
|---------------|----------|-------------|---------------|-------------|-------------|------|---------|----------|----------|-----------|-------|-------|----------|----------|------|------|------|
| SJ000311287-1 | 3{2,6,2} | 4-tertBu-Ph | 2-HO-3-MeO-Bn | 0.251±0.027 | 0.42±0.50   | 1.7  | 0.7±0.2 | >16      | 2.1±0.9  | 18.0±16.2 | 3.0   | 1.7   | 41.5±1.9 | 579±536  | 5.73 | 7.83 | 9.47 |
| SJ000311288-1 | 3{2,6,3} | 4-tertBu-Ph | Piperonyl     | 0.223±0.084 | 0.49±0.60   | 2.2  | 1.6±0.3 | >16      | 2.5±0.6  | 13.4±12.7 | 6.9   | 2.8   | 32.3±0.3 | 1196±148 | 5.76 | 8.15 | 9.47 |
| SJ000311289-1 | 3{2,6,4} | 4-tertBu-Ph | 3-F-6-MeO-Bn  | 0.144±0.060 | 1.6±9.9     | 11.0 | 1.0±0.1 | 13.6±1.5 | 3.3±2.8  | 15.2±13.6 | 6.6   | 0.4   | 38.6±0.7 | 1104±203 | 6.18 | 8.11 | 9.47 |
| SJ000311290-1 | 3{2,7,1} | Piperonyl   | Furfuryl      | 0.019±0.005 | 0.046±0.071 | 2.4  | 8.4±0.8 | >16      | >16      | >16       | 437.3 | 142.2 | 36.5±1.0 | 1266±88  | 3.54 | 8.6  | 9.47 |
| SJ000311291-1 | 3{2,7,2} | Piperonyl   | 2-HO-3-MeO-Bn | 0.008±0.007 | 0.050±0.531 | 6.0  | 1.9±1.6 | 15.8±0.4 | 8.7±1.7  | 7.7±6.1   | 226.0 | 22.7  | 39.8±1.7 | 317±41   | 4.1  | 7.83 | 9.47 |
| SJ000311292-1 | 3{2,7,3} | Piperonyl   | Piperonyl     | 0.026±0.041 | 0.027±0.003 | 1.0  | 7.6±3.3 | >16      | 13.4±1.2 | 14.7±3.3  | 295.2 | 178.8 | 36.0±1.4 | 1234±42  | 4.13 | 8.15 | 9.47 |
| SJ000311293-1 | 3{2,7,4} | Piperonyl   | 3-F-6-MeO-Bn  | 0.031±0.003 | 0.024±0.106 | 0.8  | 9.0±1.1 | >16      | 14.7±1.2 | 12.1±7.6  | 289.3 | 255.8 | 39.3±0.9 | 1031±82  | 4.55 | 8.11 | 9.47 |
| SJ000311294-1 | 3{2,8,1} | 4-MeO-Ph    | Furfuryl      | 0.011±0.028 | 0.023±0.032 | 2.2  | 7.6±2.3 | >16      | >16      | >16       | 720.8 | 261.9 | 39.4±1.7 | 906±119  | 3.76 | 8.6  | 9.47 |
| SJ000311295-1 | 3{2,8,2} | 4-MeO-Ph    | 2-HO-3-MeO-Bn | 0.013±0.006 | 0.078±0.146 | 6.0  | 2.5±0.3 | >16      | 11.6±0.7 | 14.9±14.1 | 194.9 | 20.6  | 42.4±0.2 | 282±130  | 4.32 | 7.83 | 9.47 |
| SJ000311296-1 | 3{2,8,3} | 4-MeO-Ph    | Piperonyl     | 0.029±0.025 | 0.026±0.628 | 0.9  | 6.5±0.9 | >16      | 11.4±0.7 | 14.9±2.6  | 222.5 | 218.3 | 39.1±0.6 | 1663±454 | 4.34 | 8.15 | 9.47 |

<sup>a</sup>Values are the mean of three independent experiments in triplicate. <sup>b</sup>Values are means of an experiment in triplicate. <sup>c</sup>pKa and Alog P was calculated by

Pipeline pilot of Accelrys Software Inc.

### SI-Table 3. Biological and pharmacological evaluation for akylaryls.

| SAMPLE        | No.<br>3{x,y,z} | R <sub>1</sub> | R <sub>2</sub> | 3D7 <sup>a</sup><br>EC <sub>50</sub> , μM | K1 <sup>a</sup><br>EC <sub>50</sub> , μM | K1/3D7 | HepG2 <sup>b</sup><br>EC <sub>50</sub> , μM | HEK293 <sup>b</sup><br>EC <sub>50</sub> , μM | Raji <sup>b</sup><br>EC <sub>50</sub> , μM | BJ <sup>b</sup><br>EC <sub>50</sub> , μM | HepG2<br>/3D7 | HepG2<br>/K1 | Avg. Sol <sup>b</sup><br>μM | Avg. Pe <sup>b</sup><br>X 10 <sup>6</sup> cm/s | AlogP <sup>b</sup> | pKa1 <sup>b</sup><br>(ring) | pKa2 <sup>b</sup><br>(chain) |
|---------------|-----------------|----------------|----------------|-------------------------------------------|------------------------------------------|--------|---------------------------------------------|----------------------------------------------|--------------------------------------------|------------------------------------------|---------------|--------------|-----------------------------|------------------------------------------------|--------------------|-----------------------------|------------------------------|
| SJ000311297-1 | 3{2,8,4}        | 4-MeO-Ph       | 3-F-6-MeO-Bn   | 0.096±0.010                               | 0.029±1.437                              | 0.3    | 9.1±1.2                                     | >16                                          | >16                                        | 15.1±1.3                                 | 94.6          | 205.5        | 40.2±2.8                    | 2101±616                                       | 4.76               | 8.11                        | 9.47                         |
| SJ000311242-1 | 3{3,1,1}        | 4-F-Bn         | Furfuryl       | 0.057±0.004                               | 1.7±1.9                                  | 28.9   | 6.1±0.3                                     | >16                                          | >16                                        | >16                                      | 106.5         | 3.4          | 33.8±0.9                    | 776±141                                        | 4.43               | 8.6                         | 9.47                         |
| SJ000311243-1 | 3{3,1,2}        | 4-F-Bn         | 2-HO-3-MeO-Bn  | 0.015±0.004                               | 7.2±24.5                                 | 473.5  | 9.4±7.5                                     | >16                                          | >16                                        | 15.4±2.5                                 | 624.7         | 0.7          | 38.0±0.6                    | 199±48                                         | 5                  | 7.83                        | 9.47                         |
| SJ000311244-1 | 3{3,1,3}        | 4-F-Bn         | Piperonyl      | 0.127±0.196                               | 0.26±0.29                                | 2.0    | 7.0±0.4                                     | >16                                          | >16                                        | 15.9±7.3                                 | 55.2          | 21.7         | 39.2±0.7                    | 909±117                                        | 5.02               | 8.15                        | 9.47                         |
| SJ000311245-1 | 3{3,1,4}        | 4-F-Bn         | 3-F-6-MeO-Bn   | 0.075±0.206                               | 0.58±0.67                                | 7.8    | 2.9±1.7                                     | >16                                          | 8.2±0.4                                    | 5.0±0.6                                  | 38.5          | 6.1          | 40.1±1.1                    | 838±204                                        | 5.44               | 8.11                        | 9.47                         |
| SJ000311258-1 | 3{3,10,1}       | iso-butyl      | Furfuryl       | 0.581±0.024                               | 4.5±4.7                                  | 7.7    | >16                                         | >16                                          | >16                                        | >16                                      | 27.5          | 3.6          | 31.6±2.8                    | 715±101                                        | 3.9                | 8.6                         | 9.47                         |
| SJ000311259-1 | 3{3,10,2}       | iso-butyl      | 2-HO-3-MeO-Bn  | 0.020±0.001                               | 8.100                                    | 402.5  | 3.9±0.9                                     | >16                                          | >16                                        | >16                                      | 195.4         | 0.4          | 37.8±0.5                    | 220±37                                         | 4.46               | 7.83                        | 9.47                         |
| SJ000311260-1 | 3{3,10,3}       | iso-butyl      | Piperonyl      | 0.066±0.002                               | 1.8±2.0                                  | 27.7   | 2.7±0.6                                     | >16                                          | 12.1±0.5                                   | >16                                      | 41.5          | 1.3          | 33.2±0.4                    | 1494±52                                        | 4.49               | 8.15                        | 9.47                         |
| SJ000311261-1 | 3{3,10,4}       | iso-butyl      | 3-F-6-MeO-Bn   | 0.089±0.045                               | 2.1±2.3                                  | 23.9   | 3.6±0.6                                     | >16                                          | >16                                        | 15.5±3.8                                 | 40.0          | 1.4          | 37.4±0.9                    | 1061±487                                       | 4.91               | 8.11                        | 9.47                         |
| SJ000311262-1 | 3{3,11,1}       | cHex           | Furfuryl       | 0.118±0.071                               | 3.9±4.4                                  | 33.1   | 6.6±1.0                                     | >16                                          | >16                                        | 15.4±2.9                                 | 55.6          | 1.2          | 37.1±2.1                    | 1178±201                                       | 4.45               | 8.6                         | 9.47                         |
| SJ000311263-1 | 3{3,11,2}       | cHex           | 2-HO-3-MeO-Bn  | 0.019±0.003                               | 16.000                                   | 864.9  | 1.7±0.3                                     | >16                                          | >16                                        | 15.9±1.9                                 | 90.8          | 0.1          | 38.4±0.4                    | 241±12                                         | 5.01               | 7.83                        | 9.47                         |
| SJ000311264-1 | 3{3,11,3}       | cHex           | Piperonyl      | 0.128±0.079                               | 4.7±8.8                                  | 36.7   | 5.4±0.5                                     | >16                                          | >16                                        | 15.0±2.4                                 | 41.8          | 0.6          | 36.9±0.3                    | 1298±387                                       | 5.03               | 8.15                        | 9.47                         |
| SJ000311265-1 | 3{3,11,4}       | cHex           | 3-F-6-MeO-Bn   | 0.090±0.195                               | 1.6±1.8                                  | 17.7   | 3.2±0.5                                     | >16                                          | >16                                        | 14.9±3.0                                 | 35.1          | 1.4          | 42.4±0.8                    | 1050±406                                       | 5.45               | 8.11                        | 9.47                         |

|               |           |             |               |             |           |       |           |          |          |           |       |      |          |          |      |      |      |
|---------------|-----------|-------------|---------------|-------------|-----------|-------|-----------|----------|----------|-----------|-------|------|----------|----------|------|------|------|
| SJ000311266-1 | 3{3,12,1} | 1-Et-Pr     | Furfuryl      | 0.086±0.047 | 4.3±6.0   | 50.1  | 10.3±1.4  | >16      | >16      | >16       | 119.7 | 1.6  | 39.0±1.0 | 482±132  | 4.36 | 8.6  | 9.47 |
| SJ000311267-1 | 3{3,12,2} | 1-Et-Pr     | 2-HO-3-MeO-Bn | 0.004±0.001 | 0.27±0.32 | 68.3  | 0.11±0.05 | 1.3±0.4  | 1.1±0.2  | 0.2±0.2   | 28.3  | 1.5  | 41.0±1.9 | 23±1     | 4.92 | 7.83 | 9.47 |
| SJ000311268-1 | 3{3,12,3} | 1-Et-Pr     | Piperonyl     | 0.027±0.080 | 1.1±1.2   | 39.5  | 7.4±1.9   | >16      | >16      | 15.5±3.0  | 275.9 | 6.0  | 37.2±1.2 | 404±119  | 4.95 | 8.15 | 9.47 |
| SJ000311269-1 | 3{3,12,4} | 1-Et-Pr     | 3-F-6-MeO-Bn  | 0.040±0.115 | 1.9±2.1   | 48.0  | 9.3±1.6   | >16      | >16      | >16       | 230.5 | 4.1  | 39.2±1.3 | 120±21   | 5.37 | 8.11 | 9.47 |
| SJ000311298-1 | 3{3,2,1}  | 3-CF3-Bn    | Furfuryl      | 0.056±0.008 | 0.74±0.81 | 13.2  | 3.9±0.3   | >16      | 10.5±0.4 | 15.7±3.5  | 69.8  | 4.3  | 29.2±1.7 | 1052±28  | 5.17 | 8.6  | 9.47 |
| SJ000311299-1 | 3{3,2,2}  | 3-CF3-Bn    | 2-HO-3-MeO-Bn | 0.025±0.005 | 2.2±3.4   | 87.9  | 2.1±0.4   | 13.7±0.2 | 9.6±0.5  | 15.7±10.1 | 85.8  | 0.8  | 36.1±1.7 | 226±80   | 5.73 | 7.83 | 9.47 |
| SJ000311300-1 | 3{3,2,3}  | 3-CF3-Bn    | Piperonyl     | 0.039±0.036 | 1.3±2.0   | 33.5  | 2.5±0.6   | >16      | 9.1±0.5  | 15.7±3.8  | 64.2  | 1.7  | 35.5±1.3 | 1819±266 | 5.76 | 8.15 | 9.47 |
| SJ000311301-1 | 3{3,2,4}  | 3-CF3-Bn    | 3-F-6-MeO-Bn  | 0.040±0.037 | 0.32±0.77 | 8.1   | 0.4±0.1   | >16      | 9.3±1.0  | 12.1±1.8  | 10.2  | 1.3  | 35.5±2.0 | 1544±307 | 6.18 | 8.11 | 9.47 |
| SJ000311302-1 | 3{3,3,1}  | 4-CN-Bn     | Furfuryl      | 0.039±0.013 | 0.38±0.76 | 9.7   | 11.4±1.4  | >16      | >16      | >16       | 290.7 | 20.7 | 33.0±0.2 | 908±72   | 4.11 | 8.6  | 9.47 |
| SJ000311303-1 | 3{3,3,2}  | 4-CN-Bn     | 2-HO-3-MeO-Bn | 0.011±0.003 | 5.4±5.8   | 513.5 | 8.6±1.7   | >16      | >16      | 14.1±4.8  | 815.3 | 1.3  | 36.8±0.2 | 95±64    | 4.67 | 7.83 | 9.47 |
| SJ000311304-1 | 3{3,3,3}  | 4-CN-Bn     | Piperonyl     | 0.023±0.013 | 3.1±3.2   | 136.4 | 8.6±3.6   | >16      | >16      | 15.2±5.2  | 380.2 | 2.0  | 36.0±0.3 | 1647±177 | 4.7  | 8.15 | 9.47 |
| SJ000311305-1 | 3{3,3,4}  | 4-CN-Bn     | 3-F-6-MeO-Bn  | 0.028±0.037 | 0.77±1.42 | 27.5  | 7.6±2.4   | >16      | >16      | 15.7±5.5  | 270.4 | 7.9  | 37.0±1.8 | 1521±182 | 5.12 | 8.11 | 9.47 |
| SJ000311306-1 | 3{3,4,1}  | Bn          | Furfuryl      | 0.040±0.037 | 3.6±3.9   | 89.9  | >16       | >16      | >16      | >16       | 405.1 | 4.5  | 32.3±0.3 | 1179±316 | 4.23 | 8.6  | 9.47 |
| SJ000311307-1 | 3{3,4,2}  | Bn          | 2-HO-3-MeO-Bn | 0.017±0.001 | 7.0±0.70  | 400.6 | 8.1±1.4   | >16      | >16      | >16       | 467.1 | 0.8  | 32.3±0.6 | 174±9    | 4.79 | 7.83 | 9.47 |
| SJ000311308-1 | 3{3,4,3}  | Bn          | Piperonyl     | 0.720±3.504 | 1.2±1.4   | 1.7   | 8.2±3.3   | >16      | >16      | 15.6±7.0  | 11.4  | 5.1  | 36.0±0.6 | 1664±108 | 4.82 | 8.15 | 9.47 |
| SJ000311309-1 | 3{3,4,4}  | Bn          | 3-F-6-MeO-Bn  | 0.011±0.001 | 1.4±1.5   | 129.5 | 8.3±1.2   | >16      | >16      | 15.2±2.6  | 752.8 | 5.6  | 36.3±0.4 | 1718±794 | 5.24 | 8.11 | 9.47 |
| SJ000311318-1 | 3{3,5,1}  | 3,5-Me-Bn   | Furfuryl      | 0.009±0.001 | 0.68±0.74 | 77.0  | 7.2±1.7   | >16      | >16      | >16       | 804.8 | 9.2  | 34.6±1.3 | 953±96   | 5.2  | 8.6  | 9.47 |
| SJ000311319-1 | 3{3,5,2}  | 3,5-Me-Bn   | 2-HO-3-MeO-Bn | 0.009±0.008 | 1.4±1.4   | 160.0 | 2.5±0.7   | 14.6±0.5 | 8.7±0.7  | 5.7±0.8   | 296.8 | 2.0  | 30.6±1.6 | 174±98   | 5.76 | 7.83 | 9.47 |
| SJ000311320-1 | 3{3,5,3}  | 3,5-Me-Bn   | Piperonyl     | 0.041±0.028 | 1.0±1.1   | 25.6  | 3.0±0.7   | >16      | >16      | >16       | 73.2  | 2.2  | 20.6±0.4 | 756±70   | 5.79 | 8.15 | 9.47 |
| SJ000311321-1 | 3{3,5,4}  | 3,5-Me-Bn   | 3-F-6-MeO-Bn  | 0.034±0.098 | 0.79±0.95 | 23.1  | 0.9±0.2   | >16      | 9.3±1.5  | >16       | 26.7  | 1.2  | 25.0±2.1 | 885±58   | 6.21 | 8.11 | 9.47 |
| SJ000311322-1 | 3{3,6,1}  | 2-Cl-4-F-Bn | Furfuryl      | 0.020±0.003 | 1.2±1.4   | 62.1  | 8.7±2.3   | >16      | >16      | >16       | 441.4 | 4.7  | 31.6±1.1 | 1312±14  | 5.1  | 8.6  | 9.47 |
| SJ000311323-1 | 3{3,6,2}  | 2-Cl-4-F-Bn | 2-HO-3-MeO-Bn | 0.013±0.067 | 5.1±5.4   | 404.4 | 2.9±0.5   | >16      | >16      | >16       | 228.5 | 0.5  | 36.1±3.3 | 611±182  | 5.66 | 7.83 | 9.47 |
| SJ000311324-1 | 3{3,6,3}  | 2-Cl-4-F-Bn | Piperonyl     | 0.027±0.067 | 1.0±1.0   | 35.9  | 5.3±0.7   | >16      | >16      | >16       | 201.3 | 16.8 | 39.9±2.0 | 1438±73  | 5.69 | 8.15 | 9.47 |
| SJ000311325-1 | 3{3,6,4}  | 2-Cl-4-F-Bn | 3-F-6-MeO-Bn  | 0.208±0.356 | 1.1±2.8   | 5.4   | 3.2±0.5   | >16      | >16      | >16       | 15.6  | 2.2  | 38.6±1.9 | 1337±28  | 6.11 | 8.11 | 9.47 |
| SJ000311246-1 | 3{3,7,1}  | iso-pentyl  | Furfuryl      | 0.176±0.019 | 4.6±1.7   | 26.1  | >16       | >16      | >16      | >16       | 90.7  | 2.4  | 31.8±1.8 | 861±102  | 4.36 | 8.6  | 9.47 |
| SJ000311247-1 | 3{3,7,2}  | iso-pentyl  | 2-HO-3-MeO-Bn | 0.022±0.007 | 8.0±9.6   | 365.3 | 6.4±0.3   | >16      | >16      | >16       | 294.2 | 0.7  | 35.9±1.4 | 230±53   | 4.92 | 7.83 | 9.47 |
| SJ000311248-1 | 3{3,7,3}  | iso-pentyl  | Piperonyl     | 0.027±0.246 | 0.21±0.54 | 7.6   | 2.9±1.3   | >16      | >16      | >16       | 105.6 | 13.5 | 36.5±0.7 | 2110.1   | 4.95 | 8.15 | 9.47 |
| SJ000311249-1 | 3{3,7,4}  | iso-pentyl  | 3-F-6-MeO-Bn  | 0.116±0.007 | 0.36±0.51 | 3.1   | 1.0±0.1   | >16      | >16      | >16       | 8.8   | 2.5  | 35.4±1.3 | 1447±107 | 5.37 | 8.11 | 9.47 |
| SJ000311250-1 | 3{3,8,1}  | cHexmethyl  | Furfuryl      | 0.055±0.015 | 0.62±1.72 | 11.2  | 2.2±0.3   | >16      | >16      | >16       | 40.3  | 2.7  | 31.5±0.4 | 1165±110 | 4.9  | 8.6  | 9.47 |
| SJ000311251-1 | 3{3,8,2}  | cHexmethyl  | 2-HO-3-MeO-Bn | 0.050±0.105 | 2.6±2.8   | 52.7  | 1.2±0.2   | >16      | 12.2±0.8 | 13.9±1.0  | 24.8  | 0.4  | 38.0±0.7 | 327±21   | 5.46 | 7.83 | 9.47 |
| SJ000311252-1 | 3{3,8,3}  | cHexmethyl  | Piperonyl     | 0.041±0.010 | 0.70±0.77 | 17.3  | 9.4±4.6   | >16      | >16      | >16       | 231.1 | 9.0  | 35.5±1.0 | 2035±335 | 5.49 | 8.15 | 9.47 |
| SJ000311253-1 | 3{3,8,4}  | cHexmethyl  | 3-F-6-MeO-Bn  | 0.138±0.076 | 0.69±0.80 | 5.0   | 2.8±1.5   | >16      | >16      | >16       | 20.6  | 2.7  | 37.5±1.4 | 1654±455 | 5.91 | 8.11 | 9.47 |
| SJ000311254-1 | 3{3,9,1}  | PhEt        | Furfuryl      | 0.046±0.019 | 2.9±3.1   | 63.7  | >16       | >16      | >16      | >16       | 347.8 | 5.5  | 22.5±2.5 | 459±58   | 4.69 | 8.6  | 9.47 |
| SJ000311255-1 | 3{3,9,2}  | PhEt        | 2-HO-3-MeO-Bn | 0.017±0.002 | 5.5±14.0  | 324.5 | 7.6±0.7   | >16      | >16      | 15.4±3.8  | 445.5 | 1.2  | 14.4±0.6 | 159±41   | 5.25 | 7.83 | 9.47 |
| SJ000311256-1 | 3{3,9,3}  | PhEt        | Piperonyl     | 0.013±0.002 | 1.5±1.9   | 117.1 | 5.9±0.3   | >16      | >16      | 15.0±5.3  | 449.5 | 3.2  | 4.2±0.3  | 685±149  | 5.69 | 8.15 | 9.47 |
| SJ000311257-1 | 3{3,9,4}  | PhEt        | 3-F-6-MeO-Bn  | 0.132±0.110 | 2.1±2.2   | 16.2  | 5.6±0.3   | >16      | >16      | 16.0±4.4  | 42.7  | 2.0  | 11.3±1.5 | 783±268  | 5.27 | 8.11 | 9.47 |

<sup>a</sup>Values are the mean of three independent experiments in triplicate. <sup>b</sup>Values are means of an experiment in triplicate. <sup>c</sup>pKa and Alog P was calculated by Pipeline pilot of Accelrys Software Inc.

| Structure                                                                          | No.<br>3{x,y,z} | SJ-number     | <sup>1</sup> H NMR (DMSO-d <sub>6</sub> )                                                                                                                                                                                                                                                                                                                                                                                                                                           | MW     | MW+2HCl | Yield<br>(%) | Purity (UV) | Purity<br>(ELSD) | Purity (UV-<br>ELSD, Avg.) |
|------------------------------------------------------------------------------------|-----------------|---------------|-------------------------------------------------------------------------------------------------------------------------------------------------------------------------------------------------------------------------------------------------------------------------------------------------------------------------------------------------------------------------------------------------------------------------------------------------------------------------------------|--------|---------|--------------|-------------|------------------|----------------------------|
| 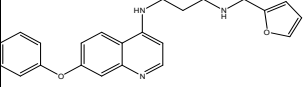   | 3{1,1,1}        | SJ000311206-1 | 13.63 (s, 1H), 9.50 (s, 1H), 9.38 (s, 1H), 8.66 (d, J = 9.2 Hz, 1H), 8.48 (d, J = 6.4 Hz, 1H), 7.76 (dd, J = 2.0, 0.8 Hz, 1H), 7.55 (dd, J = 9.2, 8.0 Hz, 2H), 7.47 (dd, J = 9.2, 2.4 Hz, 1H), 7.35 (t, J = 7.2 Hz, 1H), 7.25 (d, J = 7.6 Hz, 2H), 7.21 (d, J = 2.4 Hz, 1H), 6.8 (d, J = 7.2 Hz, 1H), 6.65 (d, J = 3.2 Hz, 1H), 6.52 (dd, J = 3.2, 1.6 Hz, 1H), 4.24 (s, 2H), 3.63 (brs, 2H), 3.03 (brs, 2H), 2.10-1.99 (m, 2H)                                                     | 373.45 | 446.37  | 59.7         | 54.48       | 64.06            | 59.27                      |
|    | 3{1,1,2}        | SJ000311207-1 | 13.63 (brs, 1H), 9.45 (brs, 1H), 9.35 (brs, 1H), 9.07 (brs, 1H), 8.99 (brs, 1H), 8.63 (d, J = 9.2 Hz, 1H), 8.47 (d, J = 7.2 Hz, 1H), 7.55 (dd, J = 8.4, 7.6 Hz, 2H), 7.47 (dd, J = 9.2, 2.8 Hz, 1H), 7.35 (t, J = 7.2 Hz, 1H), 7.25 (d, J = 7.6 Hz, 2H), 7.20 (d, J = 2.4 Hz, 1H), 7.01 (dd, J = 1.6, 8.0 Hz, 2H), 6.82 (q, J = 8.0 Hz, 2H), 4.09 (s, 2H), 3.81 (s, 3H), 3.62 (s, 2H), 3.03 (brs, 2H), 2.06 (brs, 2H)                                                               | 429.51 | 502.43  | 55.9         | 97.14       | 100              | 98.57                      |
|    | 3{1,1,3}        | SJ000311208-1 | 13.63 (brs, 1H), 9.52 (brs, 1H), 9.37 (brs, 1H), 8.66 (d, J = 9.2 Hz, 1H), 8.48 (t, J = 4.8 Hz, 1H), 7.55 (dd, J = 8.4, 7.6 Hz, 2H), 7.47 (dd, J = 9.6, 2.4 Hz, 1H), 7.35 (t, J = 7.6 Hz, 1H), 7.25 (d, J = 7.2 Hz, 2H), 7.21 (d, J = 2.4 Hz, 1H), 7.09 (d, J = 7.6 Hz, 1H), 6.96 (dd, J = 6.4, 1.2 Hz, 1H), 6.89 (t, J = 7.6 Hz, 1H), 6.85 (d, J = 7.2 Hz, 1H), 6.06 (s, 2H), 4.10 (t, J = 5.0 Hz, 2H), 3.64 (q, J = 6.4 Hz, 2H), 3.07 (brs, 2H), 2.12-2.02 (m, 2H)                | 427.5  | 500.42  | 63.3         | 100         | 100              | 100                        |
|    | 3{1,1,4}        | SJ000311209-1 | 13.77 (d, J = 5.8 Hz, 1H), 9.63 (t, J = 4.8 Hz, 1H), 9.35 (brs, 2H), 8.73 (d, J = 9.3 Hz, 1H), 8.47 (t, J = 6.7 Hz, 1H), 7.54 (t, J = 8.0 Hz, 2H), 7.47 (dd, J = 5.3, 3.2 Hz, 1H), 7.44 (dd, J = 4.4, 2.4 Hz, 1H), 7.35 (t, J = 7.4 Hz, 1H), 7.27-7.20 (m, 4H), 7.08 (dd, J = 4.4, 9.1 Hz, 1H), 6.86 (d, J = 6.9 Hz, 1H), 4.10 (t, J = 5.4 Hz, 2H), 3.81 (s, 3H), 3.65 (q, J = 6.2 Hz, 2H), 3.08-2.99 (brs, 2H), 2.15-2.05 (m, 2H)                                                  | 431.5  | 504.42  | 68.5         | 100         | 100              | 100                        |
|   | 3{1,2,1}        | SJ000311210-1 | 13.55 (brs, 1H), 9.46 (brs, 1H), 9.39 (brs, 2H), 8.62 (d, J = 9.6 Hz, 1H), 8.44 (d, J = 7.2 Hz, 1H), 7.76-7.75 (m, 1H), 7.40 (dd, J = 2.8, 9.6 Hz, 1H), 7.37 (dt, J = 1.6, 7.7 Hz, 1H), 7.29 (dd, J = 1.2, 7.2 Hz, 1H), 7.26 (dd, J = 1.6, 6.0 Hz, 1H), 7.09 (dt, J = 1.2, 7.6 Hz, 1H), 7.05 (d, J = 2.4 Hz, 1H), 6.82 (d, J = 7.6 Hz, 1H), 6.65 (d, J = 3.2 Hz, 1H), 6.51 (dd, J = 2.0, 3.2 Hz, 1H), 4.23 (s, 2H), 3.74 (s, 3H), 3.62 (brs, 2H), 3.02 (brs, 2H), 2.10-1.99 (m, 2H) | 403.48 | 476.4   | 53.5         | 87.35       | 100              | 93.675                     |
|  | 3{1,2,2}        | SJ000311211-1 | 13.59 (brs, 1H), 9.48 (brs, 1H), 9.34 (brs, 1H), 9.06 (brs, 1H), 8.61 (brs, 1H), 8.44 (brs, 1H), 7.43-7.34 (m, 2H), 7.30 (dd, J = 1.6, 8.4 Hz, 1H), 7.26 (dd, J = 1.6, 7.6 Hz, 1H), 7.09 (dt, J = 1.6, 8.0 Hz, 2H), 7.08-6.98 (m, 2H), 6.82 (d, J = 7.2 Hz, 1H), 6.79 (d, J = 8.0 Hz, 1H), 4.09 (brs, 2H), 3.81 (s, 3H), 3.74 (s, 3H), 3.62 (brs, 2H), 3.03 (brs, 2H), 2.06 (brs, 2H)                                                                                               | 459.54 | 532.46  | 50.2         | 90.33       | 100              | 95.165                     |
|  | 3{1,2,3}        | SJ000311212-1 | 13.36 (brs, 1H), 9.57 (brs, 1H), 9.50 (brs, 2H), 8.66 (d, J = 9.6 Hz, 1H), 8.44 (t, J = 6.6 Hz, 1H), 7.41-7.34 (m, 2H), 7.29 (dd, J = 8.2, 1.4 Hz, 1H), 7.26 (dd, J = 8.0, 1.6 Hz, 1H), 7.14-7.05 (m, 3H), 6.95 (dd, J = 7.6, 1.2 Hz, 1H), 6.88 (t, J = 8.0 Hz, 1H), 6.83 (d, J = 6.8 Hz, 1H), 6.06 (s, 2H), 4.08 (t, J = 5.6 Hz, 2H), 3.74 (s, 3H), 3.64 (q, J = 6.4 Hz, 2H), 3.06 (brs, 2H), 2.13-2.03 (m, 2H)                                                                    | 457.53 | 530.45  | 59.5         | 95.77       | 100              | 97.885                     |

|                                                                                                  |          |               |                                                                                                                                                                                                                                                                                                                                                                                                                                     |        |        |      |       |       |        |
|--------------------------------------------------------------------------------------------------|----------|---------------|-------------------------------------------------------------------------------------------------------------------------------------------------------------------------------------------------------------------------------------------------------------------------------------------------------------------------------------------------------------------------------------------------------------------------------------|--------|--------|------|-------|-------|--------|
| 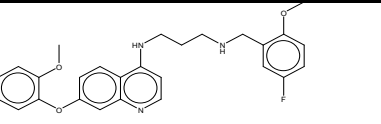<br>Structure4   | 3{1,2,4} | SJ000311213-1 | 13.55 (brs, 1H), 9.47 (brs, 1H), 9.22 (brs, 2H), 8.63 (d, J = 9.2 Hz, 1H), 8.44 (t, J = 6.8 Hz, 1H), 7.45-7.34 (m, 3H), 7.31-7.20 (m, 3H), 7.12-7.06 (m, 2H), 7.05 (d, J = 2.4 Hz, 1H), 6.83 (d, J = 7.2 Hz, 1H), 4.11 (s, 2H), 3.81 (s, 3H), 3.74 (s, 3H), 3.63 (brs, 2H), 3.04 (brs, 2H), 2.13-2.03 (m, 2H)                                                                                                                       | 461.53 | 534.45 | 51.1 | 95.67 | 100   | 97.835 |
| <br>Structure1   | 3{1,3,1} | SJ000311214-1 | 13.77 (brs, 1H), 9.61 (brs, 1H), 9.51 (brs, 2H), 8.72 (d, J = 9.2 Hz, 1H), 8.49 (d, J = 6.4 Hz, 1H), 7.78-7.74 (m, 1H), 7.48-7.41 (m, 2H), 7.29 (d, J = 2.4 Hz, 1H), 6.92 (dd, J = 8.4, 2.4 Hz, 1H), 6.86 (d, J = 7.2 Hz, 1H), 6.84 (t, J = 2.2 Hz, 1H), 6.80 (dd, J = 8.0, 2.4 Hz, 1H), 6.66 (d, J = 3.2 Hz, 1H), 6.52 (dd, J = 2.0, 2.8 Hz, 1H), 4.23 (s, 2H), 3.79 (s, 3H), 3.70-3.60 (m, 2H), 3.03 (brs, 2H), 2.13-2.03 (m, 2H) | 403.48 | 476.4  | 55.3 | 71.78 | 85.48 | 78.63  |
| <br>Structure2   | 3{1,3,2} | SJ000311215-1 | 13.72 (d, J = 6.0 Hz, 1H), 9.45 (t, J = 5.6 Hz, 1H), 9.36 (s, 1H), 9.09 (brs, 2H), 8.67 (d, J = 9.2 Hz, 1H), 8.48 (t, J = 6.6 Hz, 1H), 7.48-7.42 (m, 2H), 7.28 (d, J = 2.4 Hz, 1H), 7.02 (t, J = 6.6 Hz, 2H), 6.93 (dd, J = 8.0, 2.8 Hz, 1H), 6.88-6.77 (m, 4H), 4.10 (t, J = 5.4 Hz, 2H), 3.82 (s, 3H), 3.79 (s, 3H), 3.67-3.60 (m, 2H), 3.04 (brs, 2H), 2.13-2.02 (m, 2H)                                                         | 459.54 | 532.46 | 64.0 | 94.43 | 100   | 97.215 |
| <br>Structure3   | 3{1,3,3} | SJ000311216-1 | 13.66 (s, 1H), 9.54 (brs, 1H), 9.41 (brs, 2H), 8.67 (d, J = 9.2 Hz, 1H), 8.49 (t, J = 6.6 Hz, 1H), 7.47 (dd, J = 8.8, 2.4 Hz, 1H), 7.45 (t, J = 8.4 Hz, 1H), 7.26 (d, J = 2.4 Hz, 1H), 7.11 (d, J = 8.0 Hz, 1H), 6.99-6.78 (m, 6H), 6.07 (s, 2H), 4.10 (brs, 2H), 3.79 (s, 3H), 3.65 (brs, 2H), 3.08 (brs, 2H), 2.13-2.02 (m, 2H)                                                                                                   | 457.53 | 530.45 | 62.8 | 97.54 | 100   | 98.77  |
| <br>Structure4   | 3{1,3,4} | SJ000311217-1 | 13.55 (brs, 1H), 9.40 (brs, 1H), 9.10 (brs, 2H), 8.60 (brs, 1H), 8.50 (d, J = 6.8 Hz, 1H), 7.52-7.36 (m, 3H), 7.28-7.22 (m, 2H), 7.11 (dd, J = 9.2, 4.4 Hz, 1H), 6.93 (dd, J = 8.4, 2.4 Hz, 1H), 6.88-6.78 (m, 3H), 4.12 (s, 2H), 3.83 (s, 3H), 3.79 (s, 3H), 3.64 (brs, 2H), 3.06 (brs, 2H), 2.07 (brs, 2H)                                                                                                                        | 461.53 | 534.45 | 50.7 | 100   | 100   | 100    |
| <br>Structure1  | 3{1,4,1} | SJ000311218-1 | 13.54 (brs, 1H), 9.44 (brs, 1H), 9.36 (brs, 2H), 8.63 (d, J = 9.2 Hz, 1H), 8.47 (d, J = 7.2 Hz, 1H), 7.78-7.77 (m, 1H), 7.45 (dd, J = 9.2, 2.4 Hz, 1H), 7.23-7.18 (m, 2H), 7.13-7.07 (m, 3H), 6.83 (d, J = 7.6 Hz, 1H), 6.65 (d, J = 3.2 Hz, 1H), 6.53 (dd, J = 3.2, 1.8 Hz, 1H), 4.24 (s, 2H), 3.81 (s, 3H), 3.63 (brs, 2H), 3.03 (brs, 2H), 2.09-1.99 (m, 2H)                                                                     | 403.48 | 476.4  | 65.8 | 92.29 | 100   | 96.145 |
| <br>Structure2 | 3{1,4,2} | SJ000311219-1 | 13.69 (brs, 1H), 9.57 (brs, 1H), 9.34 (s, 1H), 9.15 (brs, 2H), 8.68 (d, J = 9.6 Hz, 1H), 8.46 (d, J = 6.8 Hz, 1H), 7.42 (dd, J = 9.6, 2.4 Hz, 1H), 7.23-7.18 (m, 2H), 7.16 (d, J = 2.8 Hz, 1H), 7.12-7.06 (m, 2H), 7.02 (dd, J = 12.0, 8.4 Hz, 2H), 6.83 (d, J = 7.2 Hz, 1H), 6.81 (t, J = 8.0 Hz, 1H), 4.09 (brs, 2H), 3.82 (s, 3H), 3.81 (s, 3H), 3.63 (brs, 2H), 3.03 (brs, 2H), 2.14-2.02 (m, 2H)                               | 459.54 | 532.46 | 69.9 | 96.71 | 100   | 98.355 |
| <br>Structure3 | 3{1,4,3} | SJ000311220-1 | 13.50 (brs, 1H), 9.43 (brs, 1H), 9.33 (brs, 2H), 8.65 (brs, 1H), 8.39 (d, J = 7.2 Hz, 1H), 7.37 (dd, J = 9.6, 2.4 Hz, 1H), 7.16-7.10 (m, 2H), 7.07-6.99 (m, 4H), 6.89 (dd, J = 8.0, 1.2 Hz, 1H), 8.62 (t, J = 8.0 Hz, 1H), 6.76 (d, J = 7.2 Hz, 1H), 5.99 (s, 2H), 4.02 (s, 2H), 3.74 (s, 3H), 3.56 (brs, 2H), 2.99 (brs, 2H), 2.05-1.95 (m, 2H)                                                                                    | 457.53 | 530.45 | 61.6 | 100   | 100   | 100    |



|                                                                                    |          |               |                                                                                                                                                                                                                                                                                                                                                                                            |        |        |      |       |     |        |
|------------------------------------------------------------------------------------|----------|---------------|--------------------------------------------------------------------------------------------------------------------------------------------------------------------------------------------------------------------------------------------------------------------------------------------------------------------------------------------------------------------------------------------|--------|--------|------|-------|-----|--------|
| 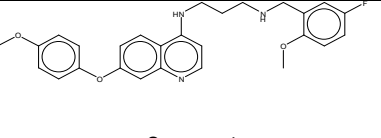   | 3{1,4,4} | SJ000311221-1 | 13.61 (brs, 1H), 9.55 (brs, 1H), 9.31 (brs, 2H), 8.67 (brs, 1H), 8.47 (d, J = 7.2 Hz, 1H), 7.48-7.40 (m, 2H), 7.28-7.18 (m, 3H), 7.17-7.07 (m, 4H), 6.45 (d, J = 7.6 Hz, 1H), 4.11 (s, 2H), 3.82 (s, 3H), 3.81 (s, 3H), 3.64 (brs, 2H), 3.05 (brs, 2H), 2.09 (brs, 2H)                                                                                                                     | 461.53 | 534.45 | 63.6 | 100   | 100 | 100    |
| <b>Structure4</b>                                                                  |          |               |                                                                                                                                                                                                                                                                                                                                                                                            |        |        |      |       |     |        |
|    | 3{1,5,1} | SJ000311222-1 | 13.69 (brs, 1H), 9.55 (brs, 1H), 9.45 (brs, 2H), 8.69 (d, J = 9.6 Hz, 1H), 8.49 (d, J = 7.2 Hz, 1H), 7.78-7.76 (m, 1H), 7.47 (dd, J = 9.2, 2.4 Hz, 1H), 7.42-7.30 (m, 4H), 7.20 (d, J = 2.8 Hz, 1H), 6.85 (d, J = 7.6 Hz, 1H), 6.66 (d, J = 3.2 Hz, 1H), 6.52 (dd, J = 3.2, 2.0 Hz, 1H), 4.24 (s, 2H), 3.64 (brs, 2H), 3.03 (brs, 2H), 2.10-2.00 (m, 2H)                                   | 391.44 | 464.36 | 54.3 | 93.43 | 100 | 96.715 |
| <b>Structure1</b>                                                                  |          |               |                                                                                                                                                                                                                                                                                                                                                                                            |        |        |      |       |     |        |
|    | 3{1,5,2} | SJ000311223-1 | 13.58 (brs, 1H), 9.39 (brs, 2H), 8.94 (brs, 2H), 8.61 (d, J = 9.2 Hz, 1H), 8.49 (d, J = 7.2 Hz, 1H), 7.48 (dd, J = 9.2, 2.8 Hz, 1H), 7.43-7.36 (m, 2H), 7.35-7.29 (m, 2H), 7.19-7.16 (m, 1H), 7.01 (t, J = 8.0 Hz, 2H), 6.87-6.79 (m, 2H), 4.10 (s, 2H), 3.82 (s, 3H), 3.62 (brs, 2H), 3.04 (brs, 2H), 2.12-2.00 (m, 2H)                                                                   | 447.5  | 520.42 | 53.6 | 97.28 | 100 | 98.64  |
| <b>Structure2</b>                                                                  |          |               |                                                                                                                                                                                                                                                                                                                                                                                            |        |        |      |       |     |        |
|    | 3{1,5,3} | SJ000311224-1 | 13.56 (brs, 1H), 9.42 (brs, 1H), 9.26 (brs, 2H), 8.62 (d, J = 9.6 Hz, 1H), 8.50 (d, J = 7.2 Hz, 1H), 7.48 (dd, J = 9.2, 2.4 Hz, 1H), 7.43-7.36 (m, 2H), 7.35-7.29 (m, 2H), 7.17 (d, J = 2.4 Hz, 1H), 7.07 (d, J = 8.0 Hz, 1H), 6.98 (d, J = 7.2 Hz, 1H), 6.90 (t, J = 7.8 Hz, 1H), 8.65 (d, J = 7.6 Hz, 1H), 6.07 (s, 2H), 4.11 (s, 2H), 3.63 (brs, 2H), 3.07 (brs, 2H), 2.12-2.00 (m, 2H) | 445.49 | 518.41 | 45.6 | 100   | 100 | 100    |
| <b>Structure3</b>                                                                  |          |               |                                                                                                                                                                                                                                                                                                                                                                                            |        |        |      |       |     |        |
|    | 3{1,5,4} | SJ000311225-1 | 13.61 (brs, 1H), 9.50 (brs, 1H), 9.18 (brs, 2H), 8.66 (d, J = 9.2 Hz, 1H), 8.50 (d, J = 7.2 Hz, 1H), 7.48 (dd, J = 9.2, 2.8 Hz, 1H), 7.45-7.36 (m, 3H), 7.35-7.29 (m, 2H), 7.25 (dt, J = 3.2, 8.6 Hz, 1H), 7.18 (d, J = 2.4 Hz, 1H), 7.10 (dd, J = 7.2, 4.4 Hz, 1H), 6.86 (d, J = 7.2 Hz, 1H), 4.12 (s, 2H), 3.82 (s, 3H), 3.64 (brs, 2H), 3.05 (brs, 2H), 2.12-2.00 (m, 2H)               | 449.49 | 522.41 | 44.2 | 100   | 100 | 100    |
| <b>Structure4</b>                                                                  |          |               |                                                                                                                                                                                                                                                                                                                                                                                            |        |        |      |       |     |        |
|   | 3{1,6,1} | SJ000311226-1 | 13.66 (brs, 1H), 9.55 (brs, 1H), 9.40 (brs, 2H), 8.68 (brs, 1H), 8.51 (d, J = 7.2 Hz, 1H), 7.79-7.76 (m, 1H), 7.63-7.58 (m, 2H), 7.50 (dd, J = 9.6, 2.4 Hz, 1H), 7.33-7.23 (m, 3H), 6.86 (d, J = 7.2 Hz, 1H), 6.65 (t, J = 2.4 Hz, 1H), 6.53 (dd, J = 3.2, 1.8 Hz, 1H), 4.25 (s, 2H), 3.64 (brs, 2H), 3.03 (brs, 2H), 2.05 (brs, 2H)                                                       | 407.9  | 480.82 | 48.9 | 84.35 | 100 | 92.175 |
| <b>Structure1</b>                                                                  |          |               |                                                                                                                                                                                                                                                                                                                                                                                            |        |        |      |       |     |        |
|  | 3{1,6,2} | SJ000311227-1 | 13.62 (brs, 1H), 9.46 (brs, 1H), 9.39 (brs, 1H), 8.96 (brs, 2H), 8.63 (d, J = 9.2 Hz, 1H), 8.51 (d, J = 7.2 Hz, 1H), 7.64-7.58 (m, 2H), 7.50 (dd, J = 9.6, 2.4 Hz, 1H), 7.33-7.27 (m, 2H), 7.24 (d, J = 2.4 Hz, 1H), 7.01 (t, J = 7.2 Hz, 2H), 6.86 (d, J = 7.2 Hz, 1H), 6.82 (t, J = 8.0 Hz, 1H), 4.10 (s, 2H), 3.82 (s, 3H), 3.62 (brs, 2H), 3.04 (brs, 2H), 2.12-2.01 (m, 2H)           | 463.96 | 536.88 | 47.8 | 96.44 | 100 | 98.22  |
| <b>Structure2</b>                                                                  |          |               |                                                                                                                                                                                                                                                                                                                                                                                            |        |        |      |       |     |        |
|  | 3{1,6,3} | SJ000311228-1 | 13.66 (brs, 1H), 9.53 (brs, 1H), 9.38 (brs, 2H), 8.67 (d, J = 9.6 Hz, 1H), 8.51 (d, J = 7.2 Hz, 1H), 7.63-7.58 (m, 2H), 7.50 (dd, J = 9.6, 2.8 Hz, 1H), 7.33-7.27 (m, 2H), 7.25 (d, J = 2.0 Hz, 1H), 7.10 (d, J = 6.0 Hz, 1H), 6.97 (d, J = 7.6 Hz, 1H), 6.93-6.84 (m, 2H), 6.07 (s, 2H), 4.10 (s, 2H), 3.65 (brs, 2H), 3.07 (brs, 2H), 2.12-2.01 (m, 2H)                                  | 461.95 | 534.87 | 53.3 | 100   | 100 | 100    |
| <b>Structure3</b>                                                                  |          |               |                                                                                                                                                                                                                                                                                                                                                                                            |        |        |      |       |     |        |

|                                                                                                  |          |               |                                                                                                                                                                                                                                                                                                                                                                                                                                                                                |        |        |      |       |       |        |
|--------------------------------------------------------------------------------------------------|----------|---------------|--------------------------------------------------------------------------------------------------------------------------------------------------------------------------------------------------------------------------------------------------------------------------------------------------------------------------------------------------------------------------------------------------------------------------------------------------------------------------------|--------|--------|------|-------|-------|--------|
| 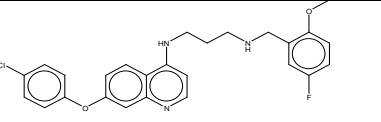<br>Structure4   | 3{1,6,4} | SJ000311229-1 | 13.65 (brs, 1H), 9.54 (brs, 1H), 9.22 (brs, 2H), 8.68 (brs, 1H), 8.51 (d, J = 6.8 Hz, 1H), 7.64-7.58 (m, 2H), 7.50 (dd, J = 9.2, 2.0 Hz, 1H), 7.47-7.40 (m, 1H), 7.33-7.22 (m, 4H), 7.10 (dd, J = 9.2, 4.8 Hz, 1H), 6.87 (d, J = 7.2 Hz, 1H), 4.12 (s, 2H), 3.82 (s, 3H), 3.65 (brs, 2H), 3.05 (brs, 2H), 2.15-2.03 (m, 2H)                                                                                                                                                    | 465.95 | 538.87 | 47.6 | 100   | 100   | 100    |
| <br>Structure1   | 3{1,7,1} | SJ000311230-1 | 13.68 (brs, 1H), 9.56 (brs, 1H), 9.49 (brs, 2H), 8.71-8.64 (m, 1H), 8.47 (t, J = 6.6 Hz, 1H), 7.78-7.76 (m, 1H), 7.44 (dd, J = 9.2, 4.4 Hz, 1H), 7.33 (t, J = 8.0 Hz, 1H), 7.25 (brs, 1H), 6.84 (d, J = 6.8 Hz, 1H), 6.77-6.69 (m, 1H), 6.66 (d, J = 3.2 Hz, 1H), 6.58 (brs, 1H), 6.55-6.45 (m, 2H), 4.24 (t, J = 5.2 Hz, 2H), 3.68-3.60 (m, 2H), 3.02 (brs, 2H), 2.94 (s, 6H), 2.11-2.01 (m, 2H)                                                                              | 416.52 | 489.44 | 43.3 | 92.48 | 100   | 96.24  |
| <br>Structure2   | 3{1,7,2} | SJ000311231-1 | 13.71 (brs, 1H), 9.55 (brs, 1H), 9.35 (brs, 1H), 9.13 (brs, 2H), 8.67 (brs, 1H), 8.46 (t, J = 6.6 Hz, 1H), 7.44 (d, J = 9.2 Hz, 1H), 7.33 (t, J = 4.4 Hz, 1H), 7.26 (brs, 1H), 7.06-6.99 (m, 2H), 6.84 (d, J = 7.2 Hz, 1H), 6.81 (t, J = 7.8 Hz, 1H), 6.73 (brs, 1H), 6.59 (brs, 1H), 6.49 (brs, 1H), 4.09 (brs, 2H), 3.82 (s, 3H), 3.69-3.59 (m, 2H), 3.03 (brs, 2H), 2.94 (s, 6H), 2.13-2.03 (m, 2H)                                                                         | 472.58 | 545.5  | 38.8 | 77.01 | 100   | 88.505 |
| <br>Structure3   | 3{1,7,3} | SJ000311232-1 | 13.64 (brs, 1H), 9.53 (brs, 1H), 9.45 (brs, 2H), 8.67 (d, J = 9.6 Hz, 1H), 8.47 (t, J = 6.6 Hz, 1H), 7.45 (dd, J = 9.2, 2.4 Hz, 1H), 7.33 (t, J = 8.2 Hz, 1H), 7.26-7.22 (m, 1H), 7.12 (d, J = 8.0 Hz, 1H), 6.97 (dd, J = 7.6, 1.2 Hz, 1H), 6.90 (t, J = 8.0 Hz, 1H), 6.84 (d, J = 7.2 Hz, 1H), 6.71 (d, J = 8.0 Hz, 1H), 6.57 (brs, 1H), 6.48 (d, J = 8.0 Hz, 1H), 6.07 (s, 2H), 4.10 (t, J = 5.6 Hz, 2H), 3.69-3.60 (m, 2H), 3.07 (brs, 2H), 2.94 (s, 6H), 2.13-2.03 (m, 2H) | 470.57 | 543.49 | 41.7 | 100   | 100   | 100    |
| <br>Structure4   | 3{1,7,4} | SJ000311233-1 | 13.68 (brs, 1H), 9.58 (brs, 1H), 9.32 (brs, 2H), 8.69 (dd, J = 9.2, 4.0 Hz, 1H), 8.46 (t, J = 6.6 Hz, 1H), 7.48-7.41 (m, 2H), 7.32 (t, J = 8.0 Hz, 1H), 7.27-7.20 (m, 2H), 7.08 (dd, J = 9.2, 4.8 Hz, 1H), 6.84 (d, J = 7.2 Hz, 1H), 6.73 (brs, 1H), 6.59 (brs, 1H), 6.48 (brs, 1H), 4.10 (t, J = 5.6 Hz, 2H), 3.81 (s, 3H), 3.69-3.60 (m, 2H), 3.04 (brs, 2H), 2.93 (s, 6H), 2.13-2.03 (m, 2H)                                                                                | 474.57 | 547.49 | 42.8 | 94.12 | 100   | 97.06  |
| <br>Structure1  | 3{1,8,1} | SJ000311234-1 | 13.63 (brs, 1H), 9.53 (brs, 3H), 8.73-8.63 (m, 1H), 8.47 (d, J = 7.2 Hz, 1H), 7.76 (dd, J = 1.7, 0.8 Hz, 1H), 7.57-7.51 (m, 2H), 7.50-7.43 (m, 1H), 7.22-7.14 (m, 3H), 6.64 (d, J = 7.2 Hz, 1H), 6.65 (d, J = 2.8 Hz, 1H), 6.52 (dd, J = 3.2, 2.0 Hz, 1H), 4.10 (s, 2H), 3.63 (brs, 2H), 3.02 (brs, 2H), 2.10-1.99 (m, 2H), 1.33 (s, 9H).                                                                                                                                      | 429.56 | 502.48 | 58.2 | 58.8  | 67.55 | 63.175 |
| <br>Structure2 | 3{1,8,2} | SJ000311235-1 | 13.63 (brs, 1H), 9.51 (brs, 1H), 9.36 (s, 1H), 9.05 (brs, 2H), 8.66 (d, J = 9.6 Hz, 1H), 8.47 (d, J = 6.8 Hz, 1H), 7.57-7.52 (m, 2H), 7.47 (dd, J = 9.2, 2.8 Hz, 1H), 7.21-7.14 (m, 3H), 7.04-6.99 (m, 2H), 6.86-6.78 (m, 2H), 4.09 (brs, 2H), 3.81 (s, 3H), 3.63 (brs, 2H), 3.03 (brs, 2H), 2.12-2.02 (m, 2H), 1.33 (s, 9H).                                                                                                                                                  | 485.62 | 558.54 | 60.0 | 96.86 | 100   | 98.43  |
| <br>Structure3 | 3{1,8,3} | SJ000311236-1 | 13.59 (brs, 1H), 9.52 (brs, 1H), 9.38 (s, 2H), 8.66 (d, J = 9.6 Hz, 1H), 8.47 (d, J = 7.2 Hz, 1H), 7.57-7.52 (m, 2H), 7.47 (dd, J = 9.6, 2.4 Hz, 1H), 7.21-7.14 (m, 3H), 7.09 (d, J = 7.6 Hz, 1H), 6.96 (d, J = 7.2 Hz, 1H), 6.89 (t, J = 7.8 Hz, 1H), 6.85 (d, J = 9.2 Hz, 1H), 6.06 (s, 2H), 4.10 (s, 2H), 3.64 (brs, 2H), 3.07 (brs, 2H), 2.12-2.00 (m, 2H), 1.33 (s, 9H).                                                                                                  | 483.61 | 556.53 | 57.7 | 100   | 100   | 100    |

|                                                                                                  |          |               |                                                                                                                                                                                                                                                                                                                                                                                       |        |        |      |       |       |        |
|--------------------------------------------------------------------------------------------------|----------|---------------|---------------------------------------------------------------------------------------------------------------------------------------------------------------------------------------------------------------------------------------------------------------------------------------------------------------------------------------------------------------------------------------|--------|--------|------|-------|-------|--------|
| 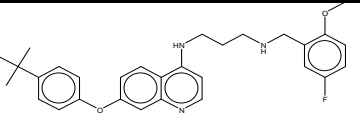<br>Structure4   | 3{1,8,4} | SJ000311237-1 | 13.54 (brs, 1H), 9.44 (brs, 1H), 9.10 (brs, 2H), 8.63 (brs, 1H), 8.48 (d, J = 7.2 Hz, 1H), 7.57-7.52 (m, 2H), 7.48 (dd, J = 9.6, 2.4 Hz, 1H), 7.44-7.38 (m, 1H), 7.25 (dt, J = 8.8, 2.8 Hz, 1H), 7.20-7.14 (m, 3H), 7.10 (dd, J = 9.2, 4.8 Hz, 1H), 6.85 (d, J = 6.8 Hz, 1H), 4.12 (s, 2H), 3.82 (s, 3H), 3.63 (brs, 2H), 3.05 (brs, 2H), 2.07 (brs, 2H), 1.33 (s, 9H).               | 487.61 | 560.53 | 61.1 | 98.02 | 100   | 99.01  |
| <br>Structure1   | 3{2,1,1} | SJ000311238-1 | 14.07 (brs, 1H), 9.57 (brs, 1H), 9.38 (brs, 2H), 8.71 (d, J = 8.8 Hz, 1H), 8.61 (d, J = 7.2 Hz, 1H), 8.16 (s, 1H), 8.07 (dd, J = 8.8, 2.0 Hz, 1H), 7.93-7.87 (m, 2H), 7.77 (dd, J = 1.8, 0.7 Hz, 1H), 7.47-7.40 (m, 2H), 6.93 (d, J = 7.2 Hz, 1H), 6.65 (d, J = 3.2 Hz, 1H), 6.52 (dd, J = 3.2, 2.0 Hz, 1H), 4.25 (s, 2H), 3.67 (brs, 2H), 3.05 (brs, 2H), 2.12-2.02 (m, 2H).         | 375.44 | 448.36 | 65.9 | 88.94 | 100   | 94.47  |
| <br>Structure2   | 3{2,1,2} | SJ000311239-1 | 14.04 (brs, 1H), 9.51 (brs, 1H), 9.38 (brs, 1H), 8.97 (brs, 2H), 8.68 (d, J = 8.8 Hz, 1H), 8.60 (d, J = 7.2 Hz, 1H), 8.15 (d, J = 1.6 Hz, 1H), 8.06 (dd, J = 8.8, 2.0 Hz, 1H), 7.93-7.87 (m, 2H), 7.47-7.40 (m, 2H), 7.03-6.98 (m, 2H), 6.92 (d, J = 7.2 Hz, 1H), 6.81 (t, J = 7.8 Hz, 1H), 4.11 (s, 2H), 3.81 (s, 3H), 3.66 (brs, 2H), 3.06 (brs, 2H), 2.12-2.02 (m, 2H).            | 431.5  | 504.42 | 61.9 | 100   | 100   | 100    |
| <br>Structure3   | 3{2,1,3} | SJ000311240-1 | 14.04 (brs, 1H), 9.57 (brs, 1H), 9.35 (brs, 2H), 8.70 (d, J = 8.8 Hz, 1H), 8.61 (d, J = 7.2 Hz, 1H), 8.16 (s, 1H), 8.07 (dd, J = 8.8, 1.8 Hz, 1H), 7.93-7.87 (m, 2H), 7.47-7.40 (m, 2H), 7.09 (d, J = 8.0 Hz, 1H), 6.97 (dd, J = 8.0, 1.2 Hz, 1H), 6.93 (d, J = 7.2 Hz, 1H), 6.90 (t, J = 8.0 Hz, 1H), 6.07 (s, 2H), 4.11 (s, 2H), 3.68 (brs, 2H), 3.09 (brs, 2H), 2.15-2.04 (m, 2H). | 429.49 | 502.41 | 55.4 | 100   | 100   | 100    |
| <br>Structure4   | 3{2,1,4} | SJ000311241-1 | 14.04 (brs, 1H), 9.57 (brs, 1H), 9.18 (brs, 2H), 8.71 (d, J = 8.8 Hz, 1H), 8.61 (d, J = 7.2 Hz, 1H), 8.16 (s, 1H), 8.06 (dd, J = 8.8, 1.2 Hz, 1H), 7.93-7.87 (m, 2H), 7.47-7.40 (m, 3H), 7.24 (dt, J = 3.2, 8.6 Hz, 1H), 7.09 (dd, J = 10.8, 2.4 Hz, 1H), 6.93 (d, J = 7.2 Hz, 1H), 4.12 (brs, 2H), 3.82 (s, 3H), 3.68 (brs, 2H), 3.07 (brs, 2H), 2.15-2.04 (m, 2H).                  | 433.49 | 506.41 | 63.3 | 100   | 100   | 100    |
| <br>Structure1  | 3{2,2,1} | SJ000311270-1 | 13.98 (brs, 1H), 9.66 (brs, 1H), 9.35 (brs, 2H), 8.78 (d, J = 8.8 Hz, 1H), 8.66 (d, J = 7.2 Hz, 1H), 8.52 (s, 2H), 8.35-8.26 (m, 3H), 7.77-7.76 (m, 1H), 6.70 (d, J = 7.6 Hz, 1H), 6.65 (d, J = 3.2 Hz, 1H), 6.52 (dd, J = 3.2, 2.0 Hz, 1H), 4.25 (brs, 2H), 3.68 (brs, 2H), 3.05 (brs, 2H), 2.15-2.04 (m, 2H).                                                                       | 493.45 | 566.37 | 79.1 | 65.58 | 76.56 | 71.07  |
| <br>Structure2 | 3{2,2,2} | SJ000311271-1 | 14.06 (brs, 1H), 9.70 (brs, 1H), 9.37 (brs, 1H), 9.06 (brs, 2H), 8.79 (d, J = 8.8 Hz, 1H), 8.64 (d, J = 7.2 Hz, 1H), 8.52 (s, 2H), 8.35 (d, J = 1.8 Hz, 1H), 8.30-8.25 (m, 2H), 7.04-6.99 (m, 2H), 6.97 (d, J = 7.2 Hz, 1H), 6.81 (t, J = 8.0 Hz, 1H), 4.11 (brs, 2H), 3.81 (s, 3H), 3.68 (brs, 2H), 3.06 (brs, 2H), 2.16-2.06 (m, 2H).                                               | 549.51 | 622.43 | 79.6 | 100   | 100   | 100    |
| <br>Structure3 | 3{2,2,3} | SJ000311272-1 | 14.05 (brs, 1H), 9.76 (brs, 1H), 9.44 (brs, 2H), 8.82 (d, J = 8.8 Hz, 1H), 8.65 (d, J = 7.2 Hz, 1H), 8.52 (s, 2H), 8.35 (d, J = 1.6 Hz, 1H), 8.30-8.25 (m, 2H), 7.11 (d, J = 8.0 Hz, 1H), 7.00-6.94 (m, 2H), 6.89 (t, J = 7.8 Hz, 1H), 6.07 (s, 2H), 4.11 (brs, 2H), 3.70 (brs, 2H), 3.10 (brs, 2H), 2.17-2.07 (m, 2H).                                                               | 547.5  | 620.42 | 79.1 | 96.37 | 100   | 98.185 |

|                                                                                    |          |               |                                                                                                                                                                                                                                                                                                                                                                                                                                                                            |        |        |      |       |       |        |
|------------------------------------------------------------------------------------|----------|---------------|----------------------------------------------------------------------------------------------------------------------------------------------------------------------------------------------------------------------------------------------------------------------------------------------------------------------------------------------------------------------------------------------------------------------------------------------------------------------------|--------|--------|------|-------|-------|--------|
| 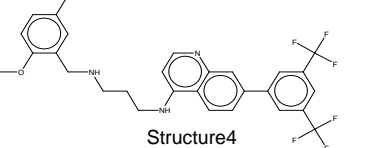   | 3{2,2,4} | SJ000311273-1 | 13.93 (brs, 1H), 9.62 (brs, 1H), 9.10 (brs, 2H), 8.76 (d, J = 8.8 Hz, 1H), 8.66 (d, J = 7.2 Hz, 1H), 8.52 (s, 2H), 8.32 (d, J = 1.6 Hz, 1H), 8.30-8.25 (m, 2H), 7.41 (dd, J = 8.8, 3.2 Hz, 1H), 7.25 (dt, J = 8.8, 3.2 Hz, 1H), 7.10 (dd, J = 8.8, 4.4 Hz, 1H), 6.97 (d, J = 7.2 Hz, 1H), 4.13 (brs, 2H), 3.82 (s, 3H), 3.68 (brs, 2H), 3.08 (brs, 2H), 2.16-2.06 (m, 2H).                                                                                                 | 551.5  | 624.42 | 64.1 | 97.66 | 100   | 98.83  |
|    | 3{2,3,1} | SJ000311274-1 | 14.04 (brs, 1H), 9.55 (brs, 1H), 9.29 (brs, 2H), 8.73 (d, J = 8.8 Hz, 1H), 8.66 (d, J = 7.2 Hz, 1H), 8.09 (d, J = 8.0 Hz, 2H), 8.03 (d, J = 1.5 Hz, 1H), 7.88 (dd, J = 8.4, 1.6 Hz, 1H), 7.83-7.78 (m, 2H), 7.68 (t, J = 7.2 Hz, 1H), 7.65-7.53 (m, 3H), 6.92 (d, J = 7.2 Hz, 1H), 6.65 (d, J = 3.2 Hz, 1H), 6.54 (dd, J = 3.2, 2.0 Hz, 1H), 4.27 (brs, 2H), 3.70 (brs, 2H), 3.07 (brs, 2H), 2.13-2.03 (m, 2H).                                                            | 407.51 | 480.43 | 76.8 | 76.6  | 89.78 | 83.19  |
|    | 3{2,3,2} | SJ000311275-1 | 14.09 (brs, 1H), 9.58 (brs, 1H), 9.40 (brs, 1H), 8.98 (brs, 2H), 8.74 (d, J = 8.8 Hz, 1H), 8.65 (d, J = 7.2 Hz, 1H), 8.09 (d, J = 8.0 Hz, 2H), 8.04 (d, J = 1.5 Hz, 1H), 7.87 (dd, J = 8.8, 1.6 Hz, 1H), 7.81 (d, J = 8.4 Hz, 1H), 7.81 (d, J = 8.4 Hz, 1H), 7.68 (t, J = 7.6 Hz, 1H), 7.65-7.53 (m, 3H), 7.04-6.96 (m, 3H), 6.83 (t, J = 8.0 Hz, 1H), 4.12 (brs, 2H), 3.82 (s, 3H), 3.69 (brs, 2H), 3.08 (brs, 2H), 2.17-2.06 (m, 2H).                                    | 463.57 | 536.49 | 75.5 | 100   | 100   | 100    |
|    | 3{2,3,3} | SJ000311276-1 | 14.13 (brs, 1H), 9.65 (brs, 1H), 9.40 (brs, 2H), 8.78 (d, J = 8.8 Hz, 1H), 8.65 (d, J = 7.2 Hz, 1H), 8.09 (d, J = 8.0 Hz, 2H), 8.05 (d, J = 1.6 Hz, 1H), 7.87 (dd, J = 8.8, 1.6 Hz, 1H), 7.81 (d, J = 8.4 Hz, 1H), 7.68 (t, J = 7.6 Hz, 1H), 7.65-7.53 (m, 3H), 7.11 (dd, J = 8.0, 0.8 Hz, 1H), 7.01-6.95 (m, 2H), 6.90 (t, J = 7.8 Hz, 1H), 6.08 (s, 2H), 4.12 (brs, 2H), 3.72 (brs, 2H), 3.11 (brs, 2H), 2.17-2.06 (m, 2H).                                              | 461.56 | 534.48 | 73.1 | 100   | 100   | 100    |
|    | 3{2,3,4} | SJ000311277-1 | 14.04 (brs, 1H), 9.58 (brs, 1H), 9.12 (brs, 2H), 8.75 (d, J = 8.8 Hz, 1H), 8.66 (d, J = 7.2 Hz, 1H), 8.09 (d, J = 8.0 Hz, 2H), 8.03 (d, J = 1.5 Hz, 1H), 7.88 (dd, J = 8.8, 1.5 Hz, 1H), 7.81 (d, J = 8.4 Hz, 1H), 7.68 (t, J = 7.6 Hz, 1H), 7.65-7.53 (m, 3H), 7.42 (dd, J = 9.2, 3.2 Hz, 1H), 7.26 (dt, J = 8.8, 3.2 Hz, 1H), 7.11 (dd, J = 9.2, 4.4 Hz, 1H), 6.99 (d, J = 7.2 Hz, 1H), 4.14 (brs, 2H), 3.83 (s, 3H), 3.71 (brs, 2H), 3.10 (brs, 2H), 2.17-2.06 (m, 2H). | 465.56 | 538.48 | 77.9 | 100   | 100   | 100    |
|   | 3{2,4,1} | SJ000311278-1 | 14.12 (brs, 1H), 9.61 (brs, 1H), 9.35 (brs, 2H), 8.76 (d, J = 9.2 Hz, 1H), 8.64 (d, J = 7.2 Hz, 1H), 8.25 (d, J = 1.6 Hz, 1H), 8.13 (dd, J = 8.8, 1.6 Hz, 1H), 8.07 (d, J = 8.0 Hz, 2H), 7.96 (d, J = 8.0 Hz, 2H), 7.78-7.76 (m, 1H), 6.95 (d, J = 7.2 Hz, 1H), 6.65 (d, J = 3.2 Hz, 1H), 6.52 (dd, J = 3.2, 2.0 Hz, 1H), 4.25 (brs, 2H), 3.68 (brs, 2H), 3.05 (brs, 2H), 2.12-2.03 (m, 2H).                                                                               | 425.45 | 498.37 | 57.1 | 77.14 | 88.8  | 82.97  |
|  | 3{2,4,2} | SJ000311279-1 | 14.11 (brs, 1H), 9.57 (brs, 1H), 9.38 (brs, 1H), 8.98 (brs, 2H), 8.74 (d, J = 9.2 Hz, 1H), 8.63 (d, J = 7.2 Hz, 1H), 8.25 (d, J = 1.6 Hz, 1H), 8.13 (dd, J = 8.8, 1.6 Hz, 1H), 8.07 (d, J = 8.0 Hz, 2H), 7.96 (d, J = 8.0 Hz, 2H), 7.05-6.93 (m, 2H), 6.95 (d, J = 7.2 Hz, 1H), 6.81 (t, J = 8.0 Hz, 1H), 4.11 (brs, 2H), 3.81 (s, 3H), 3.67 (brs, 2H), 3.06 (brs, 2H), 2.15-2.04 (m, 2H).                                                                                 | 481.51 | 554.43 | 77.5 | 97.23 | 100   | 98.615 |
|  | 3{2,4,3} | SJ000311280-1 | 14.00 (brs, 1H), 9.50 (brs, 1H), 9.20 (brs, 2H), 8.71 (d, J = 9.2 Hz, 1H), 8.64 (d, J = 7.2 Hz, 1H), 8.22 (d, J = 1.6 Hz, 1H), 8.14 (dd, J = 8.8, 1.6 Hz, 1H), 8.07 (d, J = 8.0 Hz, 2H), 7.96 (d, J = 8.0 Hz, 2H), 7.05 (d, J = 8.0 Hz, 1H), 7.00-6.87 (m, 3H), 6.07 (s, 2H), 4.12 (brs, 2H), 3.67 (brs, 2H), 3.10 (brs, 2H), 2.15-2.02 (m, 2H).                                                                                                                           | 479.5  | 552.42 | 76.7 | 100   | 100   | 100    |

|                                                                                                  |          |               |                                                                                                                                                                                                                                                                                                                                                                                                                                         |        |        |      |       |       |        |
|--------------------------------------------------------------------------------------------------|----------|---------------|-----------------------------------------------------------------------------------------------------------------------------------------------------------------------------------------------------------------------------------------------------------------------------------------------------------------------------------------------------------------------------------------------------------------------------------------|--------|--------|------|-------|-------|--------|
| 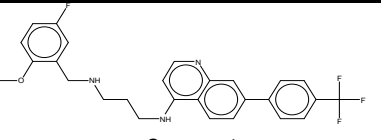<br>Structure4   | 3{2,4,4} | SJ000311281-1 | 14.09 (brs, 1H), 9.60 (brs, 1H), 9.15 (brs, 2H), 8.76 (d, J = 9.2 Hz, 1H), 8.64 (d, J = 7.2 Hz, 1H), 8.25 (d, J = 1.6 Hz, 1H), 8.13 (dd, J = 8.8, 1.6 Hz, 1H), 8.06 (d, J = 8.0 Hz, 2H), 7.97 (d, J = 8.0 Hz, 2H), 7.42 (dd, J = 9.0, 3.2 Hz, 1H), 7.24 (dt, J = 8.6, 2.8 Hz, 1H), 7.09 (dd, J = 8.8, 4.4 Hz, 1H), 6.96 (d, J = 7.2 Hz, 1H), 4.13 (brs, 2H), 3.82 (s, 3H), 3.69 (brs, 2H), 3.07 (brs, 2H), 2.16-2.06 (m, 2H).           | 483.5  | 556.42 | 77.2 | 100   | 100   | 100    |
| <br>Structure1   | 3{2,5,1} | SJ000311282-1 | 14.06 (brs, 1H), 9.54 (brs, 1H), 9.35 (brs, 2H), 8.70 (d, J = 8.8 Hz, 1H), 8.61 (d, J = 7.2 Hz, 1H), 8.19 (d, J = 1.6 Hz, 1H), 8.08 (dd, J = 8.8, 1.6 Hz, 1H), 7.87-7.82 (m, 2H), 7.78-7.76 (m, 1H), 7.63-7.56 (m, 2H), 7.55-7.50 (m, 1H), 6.93 (d, J = 6.8 Hz, 1H), 6.65 (d, J = 3.2 Hz, 1H), 6.52 (dd, J = 3.2, 2.0 Hz, 1H), 4.25 (s, 2H), 3.67 (brs, 2H), 3.05 (brs, 2H), 2.13-2.02 (m, 2H).                                         | 357.45 | 430.37 | 53.6 | 82.69 | 93.48 | 88.085 |
| <br>Structure2   | 3{2,5,2} | SJ000311283-1 | 13.99 (brs, 1H), 9.41 (brs, 2H), 8.91 (brs, 2H), 8.70 (d, J = 8.8 Hz, 1H), 8.62 (d, J = 7.2 Hz, 1H), 8.17 (d, J = 1.6 Hz, 1H), 8.09 (dd, J = 8.8, 1.6 Hz, 1H), 7.88-7.83 (m, 2H), 7.63-7.57 (m, 2H), 7.56-7.51 (m, 1H), 7.04-6.97 (m, 2H), 6.93 (d, J = 7.2 Hz, 1H), 6.82 (t, J = 8.0 Hz, 1H), 4.12 (s, 2H), 3.82 (s, 3H), 3.66 (brs, 2H), 3.07 (brs, 2H), 2.15-2.04 (m, 2H).                                                           | 413.51 | 486.43 | 62.1 | 100   | 100   | 100    |
| <br>Structure3   | 3{2,5,3} | SJ000311284-1 | 14.06 (brs, 1H), 9.55 (brs, 1H), 9.35 (brs, 2H), 8.71 (d, J = 8.8 Hz, 1H), 8.62 (d, J = 7.1 Hz, 1H), 8.19 (d, J = 1.6 Hz, 1H), 8.09 (dd, J = 8.8, 1.6 Hz, 1H), 7.88-7.83 (m, 2H), 7.63-7.57 (m, 2H), 7.56-7.51 (m, 1H), 7.10 (d, J = 7.6 Hz, 1H), 6.97 (dd, J = 8.0, 1.2 Hz, 1H), 6.94 (d, J = 7.6 Hz, 1H), 6.90 (t, J = 6.8 Hz, 1H), 6.07 (s, 2H), 4.12 (s, 2H), 3.69 (brs, 2H), 3.10 (brs, 2H), 2.15-2.05 (m, 2H).                    | 411.5  | 484.42 | 79.4 | 100   | 100   | 100    |
| <br>Structure4   | 3{2,5,4} | SJ000311285-1 | 13.99 (brs, 1H), 9.50 (brs, 1H), 9.10 (brs, 2H), 8.69 (d, J = 8.8 Hz, 1H), 8.61 (d, J = 7.2 Hz, 1H), 8.17 (d, J = 1.6 Hz, 1H), 8.08 (dd, J = 8.8, 1.6 Hz, 1H), 7.85 (d, J = 7.2 Hz, 2H), 7.63-7.56 (m, 2H), 7.56-7.51 (m, 1H), 7.41 (dd, J = 9.2, 3.2 Hz, 1H), 7.25 (dt, J = 8.8, 3.2 Hz, 1H), 7.10 (dd, J = 8.8, 4.0 Hz, 1H), 6.93 (d, J = 7.2 Hz, 1H), 4.12 (s, 2H), 3.82 (s, 3H), 3.68 (brs, 2H), 3.07 (brs, 2H), 2.15-2.05 (m, 2H). | 415.5  | 488.42 | 83.2 | 100   | 100   | 100    |
| <br>Structure1  | 3{2,6,1} | SJ000311286-1 | 14.01 (brs, 1H), 9.51 (brs, 1H), 9.33 (brs, 2H), 8.68 (d, J = 8.8 Hz, 1H), 8.60 (d, J = 7.2 Hz, 1H), 8.16 (d, J = 1.6 Hz, 1H), 8.07 (dd, J = 8.8, 1.6 Hz, 1H), 7.81-7.75 (m, 3H), 7.61 (d, J = 8.4 Hz, 2H), 6.92 (d, J = 7.2 Hz, 1H), 6.65 (d, J = 3.2 Hz, 1H), 6.52 (dd, J = 4.0, 2.0 Hz, 1H), 4.25 (s, 2H), 3.66 (brs, 2H), 3.05 (brs, 2H), 2.12-2.00 (m, 2H), 1.34 (s, 9H).                                                          | 413.56 | 486.48 | 46.4 | 71.11 | 83.1  | 77.105 |
| <br>Structure2 | 3{2,6,2} | SJ000311287-1 | 14.00 (brs, 1H), 9.48 (brs, 1H), 9.38 (brs, 1H), 8.95 (brs, 2H), 8.66 (d, J = 8.8 Hz, 1H), 8.59 (d, J = 7.2 Hz, 1H), 8.12 (d, J = 1.6 Hz, 1H), 8.06 (dd, J = 8.8, 1.6 Hz, 1H), 7.78 (d, J = 8.4 Hz, 2H), 7.61 (d, J = 8.4 Hz, 2H), 7.03-6.98 (m, 2H), 6.91 (d, J = 7.2 Hz, 1H), 6.81 (t, J = 8.0 Hz, 1H), 4.11 (s, 2H), 3.81 (s, 3H), 3.65 (brs, 2H), 3.05 (brs, 2H), 2.13-2.03 (m, 2H), 1.34 (s, 9H).                                  | 469.62 | 542.54 | 48.7 | 97.91 | 100   | 98.955 |
| <br>Structure3 | 3{2,6,3} | SJ000311288-1 | 13.96 (brs, 1H), 9.49 (brs, 1H), 9.26 (brs, 2H), 8.66 (d, J = 8.8 Hz, 1H), 8.60 (d, J = 7.2 Hz, 1H), 8.15 (d, J = 1.6 Hz, 1H), 8.07 (dd, J = 8.8, 1.6 Hz, 1H), 7.78 (d, J = 8.4 Hz, 2H), 7.61 (d, J = 8.4 Hz, 2H), 7.07 (dd, J = 7.2, 0.8 Hz, 1H), 6.97 (dd, J = 8.0, 0.8 Hz, 1H), 6.94-6.87 (m, 2H), 6.07 (s, 2H), 4.11 (s, 2H), 3.67 (brs, 2H), 3.09 (brs, 2H), 2.13-2.03 (m, 2H), 1.35 (s, 9H).                                      | 467.61 | 540.53 | 74.1 | 100   | 100   | 100    |

|                                                                                                  |          |               |                                                                                                                                                                                                                                                                                                                                                                                                                                                                           |        |        |      |       |       |        |
|--------------------------------------------------------------------------------------------------|----------|---------------|---------------------------------------------------------------------------------------------------------------------------------------------------------------------------------------------------------------------------------------------------------------------------------------------------------------------------------------------------------------------------------------------------------------------------------------------------------------------------|--------|--------|------|-------|-------|--------|
| 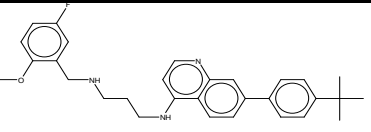<br>Structure4   | 3{2,6,4} | SJ000311289-1 | 14.01 (brs, 1H), 9.53 (brs, 1H), 9.14 (brs, 2H), 8.69 (d, J = 8.8 Hz, 1H), 8.60 (d, J = 7.2 Hz, 1H), 8.16 (d, J = 1.6 Hz, 1H), 8.06 (dd, J = 8.8, 1.6 Hz, 1H), 7.78 (d, J = 8.4 Hz, 2H), 7.61 (d, J = 8.4 Hz, 2H), 7.42 (dd, J = 8.8, 3.2 Hz, 1H), 7.24 (dt, J = 8.6, 3.2 Hz, 1H), 7.09 (dd, J = 9.2, 4.4 Hz, 1H), 6.92 (d, J = 7.2, 1H), 4.12 (s, 2H), 3.82 (s, 3H), 3.68 (brs, 2H), 3.07 (brs, 2H), 2.15-2.05 (m, 2H), 1.35 (s, 9H).                                    | 471.61 | 544.53 | 65.7 | 100   | 100   | 100    |
| <br>Structure1   | 3{2,7,1} | SJ000311290-1 | 13.97 (brs, 1H), 9.42 (brs, 1H), 9.25 (brs, 2H), 8.63-8.57 (m, 2H), 8.07 (d, J = 1.6 Hz, 1H), 8.03 (dd, J = 8.8, 1.6 Hz, 1H), 7.78-7.76 (m, 1H), 7.44 (d, J = 2.0 Hz, 1H), 7.35 (dd, J = 8.0, 2.0 Hz, 1H), 7.13 (d, J = 8.0 Hz, 1H), 6.90 (d, J = 7.6 Hz, 1H), 6.64 (d, J = 3.2 Hz, 1H), 6.52 (dd, J = 3.2, 2.0 Hz, 1H), 6.14 (s, 2H), 4.25 (s, 2H), 3.65 (brs, 2H), 3.06 (brs, 2H), 2.10-2.00 (m, 2H).                                                                   | 401.66 | 474.58 | 72.6 | 73.73 | 86.18 | 79.955 |
| <br>Structure2   | 3{2,7,2} | SJ000311291-1 | 14.00 (brs, 1H), 9.49 (brs, 1H), 9.37 (brs, 1H), 9.00 (brs, 2H), 8.64 (d, J = 8.8 Hz, 1H), 8.57 (d, J = 7.2 Hz, 1H), 8.10 (d, J = 1.6 Hz, 1H), 8.02 (dd, J = 8.8, 1.6 Hz, 1H), 7.44 (d, J = 1.8 Hz, 1H), 7.35 (dd, J = 8.0, 2.0 Hz, 1H), 7.13 (d, J = 8.0 Hz, 1H), 7.00 (d, J = 8.0, 8.0 Hz, 2H), 6.90 (d, J = 7.2 Hz, 1H), 6.81 (t, J = 8.0 Hz, 1H), 6.13 (s, 2H), 4.10 (s, 2H), 3.81 (s, 3H), 3.65 (brs, 2H), 3.05 (brs, 2H), 2.14-2.04 (m, 2H).                        | 457.72 | 530.64 | 72.3 | 100   | 100   | 100    |
| <br>Structure3   | 3{2,7,3} | SJ000311292-1 | 13.85 (brs, 1H), 9.40 (brs, 1H), 9.18 (brs, 2H), 8.62-8.57 (m, 2H), 8.06 (d, J = 1.6 Hz, 1H), 8.03 (dd, J = 8.8, 1.6 Hz, 1H), 7.44 (d, J = 1.8 Hz, 1H), 7.36 (dd, J = 8.0, 2.0 Hz, 1H), 7.13 (d, J = 8.0 Hz, 1H), 7.05 (d, J = 7.6 Hz, 1H), 6.97 (dd, J = 7.6, 0.8 Hz, 1H), 6.93-6.86 (m, 2H), 6.14 (s, 2H), 6.07 (s, 2H), 4.11 (s, 2H), 3.66 (brs, 2H), 3.09 (brs, 2H), 2.12-2.02 (m, 2H).                                                                               | 455.71 | 528.63 | 78.4 | 100   | 100   | 100    |
| <br>Structure4   | 3{2,7,4} | SJ000311293-1 | 13.97 (brs, 1H), 9.52 (brs, 1H), 9.16 (brs, 2H), 8.65 (d, J = 8.8 Hz, 1H), 8.58 (d, J = 7.2 Hz, 1H), 8.10 (d, J = 1.6 Hz, 1H), 8.03 (dd, J = 8.8, 1.6 Hz, 1H), 7.44 (d, J = 4.2 Hz, 1H), 7.42 (dd, J = 8.8, 3.2 Hz, 1H), 7.35 (dd, J = 8.0, 2.0 Hz, 1H), 7.23 (dd, J = 8.8, 3.2 Hz, 1H), 7.13 (d, J = 8.0 Hz, 1H), 7.09 (dd, J = 9.2, 4.4 Hz, 1H), 6.91 (d, J = 7.2 Hz, 1H), 6.14 (s, 2H), 4.12 (s, 2H), 3.82 (s, 3H), 3.67 (brs, 2H), 3.06 (brs, 2H), 2.15-2.04 (m, 2H). | 459.71 | 532.63 | 75.3 | 100   | 100   | 100    |
| <br>Structure1  | 3{2,8,1} | SJ000311294-1 | 14.01 (brs, 1H), 9.52 (brs, 1H), 9.38 (brs, 2H), 8.67 (d, J = 8.8 Hz, 1H), 8.59 (d, J = 7.2 Hz, 1H), 8.14 (d, J = 1.6 Hz, 1H), 8.06 (dd, J = 8.8, 1.6 Hz, 1H), 7.82 (d, J = 8.8 Hz, 2H), 7.78-7.76 (m, 1H), 7.15 (d, J = 8.8 Hz, 2H), 6.90 (d, J = 7.2 Hz, 1H), 6.66 (d, J = 3.2 Hz, 1H), 6.53 (dd, J = 3.2, 2.0 Hz, 1H), 4.25 (s, 2H), 3.85 (s, 3H), 3.67 (brs, 2H), 3.05 (brs, 2H), 2.13-2.00 (m, 2H).                                                                  | 387.48 | 460.4  | 69.4 | 80.43 | 92.14 | 86.285 |
| <br>Structure2 | 3{2,8,2} | SJ000311295-1 | 13.92 (brs, 1H), 9.40 (brs, 2H), 8.93 (brs, 2H), 8.63 (d, J = 8.8 Hz, 1H), 8.58 (d, J = 7.2 Hz, 1H), 8.11 (d, J = 1.6 Hz, 1H), 8.06 (dd, J = 8.8, 1.6 Hz, 1H), 7.82 (d, J = 8.8 Hz, 2H), 7.15 (d, J = 8.8 Hz, 2H), 7.00 (t, J = 7.6 Hz, 2H), 6.90 (d, J = 7.2 Hz, 1H), 6.82 (t, J = 8.0 Hz, 1H), 4.11 (s, 2H), 3.85 (s, 3H), 3.82 (s, 3H), 3.66 (brs, 2H), 3.06 (brs, 2H), 2.13-2.00 (m, 2H).                                                                             | 443.54 | 516.46 | 67.5 | 100   | 100   | 100    |
| <br>Structure3 | 3{2,8,3} | SJ000311296-1 | 13.90 (brs, 1H), 9.45 (brs, 1H), 9.28 (brs, 2H), 8.64 (d, J = 8.8 Hz, 1H), 8.58 (d, J = 7.2 Hz, 1H), 8.11 (d, J = 1.6 Hz, 1H), 8.05 (dd, J = 8.8, 1.6 Hz, 1H), 7.81 (d, J = 8.8 Hz, 2H), 7.15 (d, J = 8.8 Hz, 2H), 7.07 (dd, J = 8.0, 0.8 Hz, 1H), 6.97 (dd, J = 8.0, 1.0 Hz, 1H), 6.90-6.87 (m, 2H), 6.07 (s, 2H), 4.11 (s, 2H), 3.85 (s, 3H), 3.66 (brs, 2H), 3.09 (brs, 2H), 2.15-2.00 (m, 2H).                                                                        | 441.53 | 514.45 | 70.6 | 100   | 100   | 100    |

|                                                                                                  |           |               |                                                                                                                                                                                                                                                                                                                                                                                                                                         |        |        |      |       |       |        |
|--------------------------------------------------------------------------------------------------|-----------|---------------|-----------------------------------------------------------------------------------------------------------------------------------------------------------------------------------------------------------------------------------------------------------------------------------------------------------------------------------------------------------------------------------------------------------------------------------------|--------|--------|------|-------|-------|--------|
| 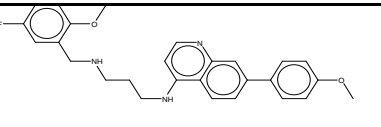<br>Structure4   | 3{2,8,4}  | SJ000311297-1 | 13.94 (brs, 1H), 9.48 (brs, 1H), 9.13 (brs, 2H), 8.66 (d, J = 8.8 Hz, 1H), 8.59 (d, J = 7.2 Hz, 1H), 8.12 (d, J = 1.6 Hz, 1H), 8.05 (dd, J = 8.8, 1.6 Hz, 1H), 7.82 (d, J = 8.8 Hz, 2H), 7.43 (dd, J = 8.8, 3.2, Hz, 1H), 7.25 (td, J = 8.8, 3.2 Hz, 1H), 7.15 (d, J = 8.8 Hz, 2H), 7.10 (dd, J = 8.8, 4.4, 1H), 6.91 (d, J = 7.2 Hz, 1H), 4.13 (s, 2H), 3.85 (s, 3H), 3.83 (s, 3H), 3.68 (brs, 2H), 3.07 (brs, 2H), 2.15-2.00 (m, 2H). | 445.53 | 518.45 | 71.9 | 100   | 100   | 100    |
| <br>Structure1   | 3{3,1,1}  | SJ000311242-1 | 13.91 (brs, 1H), 9.49 (brs, 1H), 9.41 (brs, 2H), 8.58 (d, J = 8.0 Hz, 1H), 8.52 (d, J = 7.2 Hz, 1H), 7.76 (d, J = 1.6 Hz, 1H), 7.70 (s, 1H), 7.61 (dd, J = 8.8, 1.2 Hz, 1H), 7.34 (dd, J = 8.8, 4.8 Hz, 2H), 7.17 (t, J = 8.8 Hz, 2H), 6.88 (d, J = 7.2, Hz, 1H), 6.64 (d, J = 3.2 Hz, 1H), 6.51 (dd, J = 3.2, 1.8 Hz, 1H), 4.23 (s, 2H), 4.20 (s, 2H), 3.64 (s, 2H), 3.02 (brs, 2H), 2.10-2.00 (m, 2H).                                | 389.47 | 462.39 | 85.9 | 56.63 | 70.44 | 63.535 |
| <br>Structure2   | 3{3,1,2}  | SJ000311243-1 | 13.89 (brs, 1H), 9.46 (brs, 1H), 9.36 (brs, 1H), 9.01 (brs, 2H), 8.55 (d, J = 8.8 Hz, 1H), 8.51 (d, J = 7.2 Hz, 1H), 7.69 (s, 1H), 7.61 (dd, J = 8.8, 1.2 Hz, 1H), 7.34 (dd, J = 8.8, 4.8 Hz, 2H), 7.18 (t, J = 8.8 Hz, 2H), 7.00 (d, J = 8.8, Hz, 2H), 6.87 (d, J = 7.2 Hz, 1H), 6.80 (t, J = 8.0 Hz, 1H), 4.20 (s, 2H), 4.09 (s, 2H), 3.81 (s, 3H), 3.63 (s, 2H), 3.02 (brs, 2H), 2.12-2.00 (m, 2H).                                  | 445.53 | 518.45 | 87.7 | 96.35 | 100   | 98.175 |
| <br>Structure3   | 3{3,1,3}  | SJ000311244-1 | 13.90 (brs, 1H), 9.52 (brs, 1H), 9.41 (brs, 2H), 8.58 (d, J = 8.8 Hz, 1H), 8.51 (d, J = 7.2 Hz, 1H), 7.70 (s, 1H), 7.61 (dd, J = 8.8, 1.2 Hz, 1H), 7.34 (dd, J = 8.8, 4.8 Hz, 2H), 7.18 (t, J = 8.8 Hz, 2H), 7.10 (d, J = 8.0, Hz, 1H), 6.95 (d, J = 7.2 Hz, 1H), 6.91-6.85 (m, 2H), 6.06 (s, 2H), 4.20 (s, 2H), 4.09 (brs, 2H), 3.63 (brs, 2H), 3.07 (brs, 2H), 2.12-2.00 (m, 2H).                                                     | 443.52 | 516.44 | 86.9 | 96.85 | 100   | 98.425 |
| <br>Structure4   | 3{3,1,4}  | SJ000311245-1 | 13.92 (brs, 1H), 9.54 (brs, 1H), 9.26 (brs, 2H), 8.63-8.56 (m, 1H), 8.54-8.49 (m, 1H), 7.70 (s, 1H), 7.61 (d, J = 8.8 Hz, 1H), 7.47-7.41 (m, 1H), 7.34(dd, J = 8.8, 4.8 Hz, 2H), 7.23 (dt, J = 8.8, 3.2 Hz, 1H), 7.18 (t, J = 8.8 Hz, 2H), 7.08 (dd, J = 9.2, 4.4 Hz, 1H), 6.89 (d, J = 7.2 Hz, 1H), 4.20 (s, 2H), 4.09 (brs, 2H), 3.81 (s, 3H), 3.65 (brs, 2H), 3.05 (brs, 2H), 2.14-2.04 (m, 2H).                                     | 447.52 | 520.44 | 87.4 | 97.4  | 100   | 98.7   |
| <br>Structure1  | 3{3,10,1} | SJ000311258-1 | 14.02 (brs, 1H), 9.48 (brs, 3H), 8.57 (d, J = 8.0 Hz, 1H), 8.53 (d, J = 7.2 Hz, 1H), 7.76 (s, 1H), 7.71 (s, 1H), 7.57 (d, J = 8.4 Hz, 1H), 6.88 (d, J = 7.2 Hz, 1H), 6.65 (d, J = 3.2 Hz, 1H), 6.52 (dd, J = 3.2, 2.0 Hz, 1H), 4.24 (brs, 2H), 3.65 (brs, 2H), 3.03 (brs, 2H), 2.69 (d, J = 7.2 Hz, 2H), 2.12-2.02 (m, 2H), 2.01-1.92 (m, 1H), 0.91 (d, J = 6.8 Hz, 6H).                                                                | 337.46 | 410.38 | 51.7 | 87.52 | 100   | 93.76  |
| <br>Structure2 | 3{3,10,2} | SJ000311259-1 | 13.92 (brs, 1H), 9.38 (brs, 2H), 8.98 (brs, 2H), 8.55-8.50 (m, 2H), 7.69 (brs, 1H), 7.59-7.57(m, 1H), 7.02-6.99 (m, 2H), 6.87 (d, J = 8.0 Hz, 1H), 6.81 (t, J = 8.0 Hz, 1H), 4.10 (brs, 2H), 3.82 (s, 3H), 3.63 (brs, 2H), 3.05 (brs, 2H), 2.69 (d, J = 7.2Hz, 2H), 2.12-2.02 (m, 2H), 2.02-1.92 (m, 1H), 0.91 (d, J = 6.8Hz, 6H).                                                                                                      | 393.52 | 466.44 | 53.8 | 96.35 | 100   | 98.175 |
| <br>Structure3 | 3{3,10,3} | SJ000311260-1 | 13.92 (brs, 1H), 9.45 (brs, 1H), 9.36 (brs, 2H), 8.56-8.52 (m, 2H), 7.69 (s, 1H), 7.58(dd, J = 8.8, 1.6Hz, 1H), 7.09 (d, J = 8.0 Hz, 1H), 6.97 (d, J = 8.4 Hz, 1H), 6.92-6.86 (m, 2H), 6.08 (s, 2H), 4.10 (brs, 2H), 3.65 (brs, 2H), 3.08 (brs, 2H), 2.69 (d, J = 7.2Hz, 2H), 2.12-2.02 (m, 2H), 2.02-1.92 (m, 1H), 0.91 (d, J = 6.8Hz, 6H).                                                                                            | 391.51 | 464.43 | 69.3 | 94.96 | 100   | 97.48  |

|                                                                                                      |           |               |                                                                                                                                                                                                                                                                                                                                                                                                                  |        |        |      |       |     |        |
|------------------------------------------------------------------------------------------------------|-----------|---------------|------------------------------------------------------------------------------------------------------------------------------------------------------------------------------------------------------------------------------------------------------------------------------------------------------------------------------------------------------------------------------------------------------------------|--------|--------|------|-------|-----|--------|
| 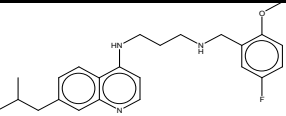 <p>Structure4</p>   | 3{3,10,4} | SJ000311261-1 | 13.90 (brs, 1H), 9.45 (brs, 1H), 9.16 (brs, 2H), 8.56-8.51 (m, 2H), 7.69 (s, 1H), 7.58 (d, J = 8.4 Hz, 1H), 7.42 (dd, J = 8.8, 3.2 Hz, 1H), 7.24 (dt, J = 8.4, 3.2 Hz, 1H), 7.09 (dd, J = 9.2, 4.4 Hz, 1H), 6.89 (d, J = 7.2, 1H), 4.12 (s, 2H), 3.82 (s, 3H), 3.66 (brs, 2H), 3.06 (brs, 2H), 2.69 (d, J = 7.2Hz, 2H), 2.12-2.02 (m, 2H), 2.02-1.92 (m, 1H), 0.91 (d, J = 6.8Hz, 6H).                           | 395.51 | 468.43 | 82.4 | 94.89 | 100 | 97.445 |
|  <p>Structure1</p>   | 3{3,11,1} | SJ000311262-1 | 13.89 (brs, 1H), 9.30(brs, 3H), 8.54 (d, J = 7.2 Hz, 1H), 8.50 (d, J = 8.8Hz, 1H), 7.77-7.76 (m, 1H), 7.71 (brs, 1H), 7.66 (d, J = 8.4 Hz, 1H), 6.86 (d, J = 7.2 Hz, 1H), 6.65 (d, J = 3.2 Hz, 1H), 6.52 (dd, J = 3.2, 2.0 Hz, 1H), 4.23 (brs, 2H), 3.63 (brs, 2H), 3.03 (brs, 2H), 2.80-2.72 (m, 1H), 2.12-2.02 (m, 2H), 1.94-1.81 (m, 4H), 1.78-1.73 (m, 1H), 1.54-1.37 (m, 4H), 1.35-1.24 (m, 1H).            | 363.5  | 436.42 | 45.7 | 82.21 | 100 | 91.105 |
|  <p>Structure2</p>   | 3{3,11,2} | SJ000311263-1 | 14.00 (brs, 1H), 9.42 (brs, 1H), 9.36 (brs, 1H), 9.02 (brs, 2H), 8.55-8.50 (m, 2H), 7.75 (brs, 1H), 7.66-7.58 (m, 1H), 7.01 (d, J = 7.2 Hz, 2H), 6.87 (d, J = 8.0 Hz, 1H), 6.81 (t, J = 8.0 Hz, 1H), 4.09 (brs, 2H), 3.01 (s,3H), 3.63 (brs, 2H), 3.04 (brs, 2H), 2.80-2.72 (m, 1H), 2.12-2.02 (m, 2H), 1.94-1.81 (m, 4H), 1.78-1.73 (m, 1H), 1.54-1.37 (m, 4H), 1.35-1.24 (m, 1H).                              | 419.56 | 492.48 | 45.1 | 94.64 | 100 | 97.32  |
|  <p>Structure3</p>   | 3{3,11,3} | SJ000311264-1 | 13.98 (brs, 1H), 9.43 (brs, 1H), 9.35 (brs, 2H), 8.56-8.52 (m, 2H), 7.74 (s, 1H), 7.66 (dd, J = 8.8, 1.2 Hz, 1H), 7.09 (d, J = 8.0 Hz, 1H), 7.00-6.87 (m, 3H), 6.06 (s, 2H), 4.10 (brs, 2H), 3.65 (brs, 2H), 3.07 (brs, 2H), 2.81-2.72 (m, 1H), 2.12-2.02 (m, 2H), 1.94-1.81 (m, 4H), 1.78-1.72 (m, 1H), 1.54-1.37 (m, 4H), 1.35-1.24 (m, 1H).                                                                   | 417.55 | 490.47 | 70.8 | 92.64 | 100 | 96.32  |
|  <p>Structure4</p>   | 3{3,11,4} | SJ000311265-1 | 13.87 (brs, 1H), 9.36 (brs, 1H), 9.09 (brs, 2H), 8.56-8.51 (m, 2H), 7.72 (s, 1H), 7.66 (d, J = 8.4 Hz, 1H), 7.41 (dd, J = 8.8, 3.2 Hz, 1H), 7.24 (dt, J = 8.4, 3.2 Hz, 1H), 7.09 (dd, J = 9.2, 4.4 Hz, 1H), 6.88 (d, J = 7.2, 1H), 4.11 (s, 2H), 3.82 (s, 3H), 3.65 (brs, 2H), 3.05 (brs, 2H), 2.81-2.72 (m, 1H), 2.12-2.02 (m, 2H), 1.94-1.81 (m, 4H), 1.78-1.72 (m, 1H), 1.54-1.37 (m, 4H), 1.35-1.24 (m, 1H). | 421.55 | 494.47 | 73.7 | 93.15 | 100 | 96.575 |
|  <p>Structure1</p>  | 3{3,12,1} | SJ000311266-1 | 14.12 (brs, 1H), 9.48 (brs, 3H), 8.76 (d, J = 9.2 Hz, 1H), 8.64-8.52 (m, 1H), 7.75 (d, J = 8.0 Hz, 2H), 7.66-7.58 (m, 1H), 6.87 (d, J = 7.2 Hz, 1H), 6.65 (d, J = 3.2 Hz, 1H), 6.52 (dd, J = 3.2, 2.0 Hz, 1H), 4.24 (brs, 2H), 3.65 (brs, 2H), 3.03 (brs, 2H), 2.81 (m, 1H), 2.08-2.02 (m, 2H), 1.72-1.57 (m, 2H), 1.33-1.27 (m, 5H), 0.90-0.84 (m, 3H).                                                         | 351.49 | 424.41 | 36.5 | 99.01 | 100 | 99.505 |
|  <p>Structure2</p> | 3{3,12,2} | SJ000311267-1 | 14.00 (brs, 1H), 9.42 (brs, 1H), 9.37 (brs, 1H), 9.01 (brs, 2H), 8.55-8.50 (m, 2H), 7.73 (brs, 1H), 7.66-7.58 (m, 1H), 7.01 (d, J = 7.2 Hz, 2H), 6.87 (d, J = 8.0 Hz, 1H), 6.81 (t, J = 8.0 Hz, 1H), 4.10 (brs, 2H), 3.02 (s, 3H), 3.63 (brs, 2H), 3.04 (brs, 2H), 2.82-2.78 (m, 1H), 2.12-2.02 (m, 2H), 1.72-1.57 (m, 2H), 1.38-1.10 (m, 5H), 0.90-0.84 (m, 3H).                                                | 407.55 | 480.47 | 43.0 | 98.27 | 100 | 99.135 |
|  <p>Structure3</p> | 3{3,12,3} | SJ000311268-1 | 13.82 (brs, 1H), 9.37 (brs, 1H), 9.25 (brs, 2H), 8.56-8.48 (m, 2H), 7.70 (s, 1H), 7.67-7.59 (m, 1H), 7.06 (d, J = 8.0 Hz, 1H), 6.97 (d, J = 8.4Hz, 1H), 6.92-6.86 (m, 2H), 6.07 (s, 2H), 4.11 (brs, 2H), 3.65 (brs, 2H), 3.08 (brs, 2H), 2.82-2.78 (m, 1H), 2.12-2.02 (m, 2H), 1.72-1.57 (m, 2H), 1.38-1.10 (m, 5H), 0.90-0.84 (m, 3H).                                                                          | 405.54 | 478.46 | 70.2 | 97.22 | 100 | 98.61  |



|                                                                                                  |           |               |                                                                                                                                                                                                                                                                                                                                                                                               |        |        |      |       |       |        |
|--------------------------------------------------------------------------------------------------|-----------|---------------|-----------------------------------------------------------------------------------------------------------------------------------------------------------------------------------------------------------------------------------------------------------------------------------------------------------------------------------------------------------------------------------------------|--------|--------|------|-------|-------|--------|
| 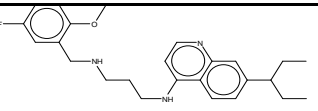<br>Structure4   | 3{3,12,4} | SJ000311269-1 | 13.91 (brs, 1H), 9.46 (brs, 1H), 9.20 (brs, 2H), 8.56-8.51 (m, 2H), 7.69 (s, 1H), 7.62 (d, J = 8.4 Hz, 1H), 7.43 (dd, J = 8.8, 3.2 Hz, 1H), 7.24 (dt, J = 8.4, 3.2 Hz, 1H), 7.09 (dd, J = 9.2, 4.4 Hz, 1H), 6.88 (d, J = 7.2, 1H), 4.11 (s, 2H), 3.82 (s, 3H), 3.66 (brs, 2H), 3.05 (brs, 2H), 2.82-2.78 (m, 1H), 2.12-2.02 (m, 2H), 1.72-1.57 (m, 2H), 1.38-1.10 (m, 5H), 0.90-0.84 (m, 3H). | 409.54 | 482.46 | 72.3 | 97.75 | 100   | 98.875 |
| <br>Structure1   | 3{3,2,1}  | SJ000311298-1 | 13.87 (brs, 1H), 9.48 (brs, 1H), 9.36 (brs, 2H), 8.58 (d, J = 8.8 Hz, 1H), 8.52 (d, J = 7.2 Hz, 1H), 7.76-7.75 (m, 1H), 7.73 (brs, 1H), 7.71 (brs, 1H), 7.68-7.56(m, 4H), 6.88 (d, J = 7.2 Hz, 1H), 6.64 (d, J = 3.2 Hz, 1H), 6.51 (dd, J = 3.2, 1.8 Hz, 1H), 4.33 (s, 2H), 4.23 (s, 2H), 3.63 (brs, 2H), 3.02 (brs, 2H), 2.10-1.99 (m, 2H).                                                  | 439.48 | 512.4  | 81.0 | 92.01 | 100   | 96.005 |
| <br>Structure2   | 3{3,2,2}  | SJ000311299-1 | 13.80 (brs, 1H), 9.38 (brs, 2H), 8.90 (brs, 2H), 8.52 (s, 1H), 8.50 (s, 1H), 7.71 (s, 2H), 7.68-7.56 (m, 4H), 6.98 (t, J = 7.2 Hz, 2H), 6.87 (d, J = 7.2 Hz, 1H), 6.80 (t, J = 8.0 Hz, 1H), 4.33 (s, 2H), 4.09 (s, 2H), 3.62 (brs, 2H), 3.03 (brs, 2H), 2.10-2.00 (m, 2H).                                                                                                                    | 495.54 | 568.46 | 76.2 | 100   | 100   | 100    |
| <br>Structure3   | 3{3,2,3}  | SJ000311300-1 | 13.78 (brs, 1H), 9.38 (brs, 1H), 9.22 (brs, 2H), 8.54 (d, J = 2.8Hz, 1H), 8.51 (s, 1H), 7.71 (s, 2H), 7.68-7.56 (m, 4H), 7.05 (d, J = 8.0 Hz, 1H), 6.96 (dd, J = 8.0, 0.8 Hz, 1H), 6.91-6.86 (m, 2H), 6.06 (s, 2H), 4.33 (s, 2H), 4.10 (s, 2H), 3.64 (brs, 2H), 3.07 (brs, 2H), 2.10-2.00 (m, 2H).                                                                                            | 493.53 | 566.45 | 80.7 | 97.9  | 100   | 98.95  |
| <br>Structure4   | 3{3,2,4}  | SJ000311301-1 | 13.82 (brs, 1H), 9.43 (brs, 1H), 9.10 (brs, 2H), 8.55 (d, J = 8.8 Hz, 1H), 8.52 (d, J = 6.8 Hz, 1H), 7.71 (s, 2H), 7.68-7.56 (m, 4H), 7.40 (dd, J = 8.8, 3.2 Hz, 1H), 7.23 (dt, J = 9.0, 3.2 Hz, 1H), 7.08 (dd, J = 8.8, 4.4 Hz, 1H), 6.88 (d, J = 7.2 Hz, 1H), 4.33 (s, 2H), 4.11 (s, 2H), 3.01 (brs, 3H), 3.64 (brs, 2H), 3.05 (brs, 2H), 2.10-2.00 (m, 2H).                                | 497.53 | 570.45 | 74.9 | 100   | 100   | 100    |
| <br>Structure1  | 3{3,3,1}  | SJ000311302-1 | 13.89 (brs, 1H), 9.46 (brs, 1H), 9.34 (brs, 2H), 8.56 (d, J = 8.8 Hz, 1H), 8.53 (d, J = 7.2 Hz, 1H), 7.83 (d, J = 8.0 Hz, 2H), 7.70-7.75 (m, 1H), 7.71 (s, 1H), 7.63 (dd, J = 8.8, 1.2 Hz, 1H), 7.52 (d, J = 8.8 Hz, 2H), 6.88 (d, J = 7.2, Hz, 1H), 6.64 (d, J = 3.2 Hz, 1H), 6.52 (dd, J = 3.2, 1.8 Hz, 1H), 4.32 (s, 2H), 4.23 (s, 2H), 3.63 (s, 2H), 3.02 (brs, 2H), 2.10-2.00 (m, 2H).   | 396.49 | 469.41 | 79.6 | 94.81 | 100   | 97.405 |
| <br>Structure2 | 3{3,3,2}  | SJ000311303-1 | 13.80 (brs, 1H), 9.39 (brs, 2H), 8.88 (brs, 2H), 8.52 (d, J = 7.2 Hz, 1H), 8.51 (d, J = 8.8 Hz, 1H), 7.83 (d, J = 8.0 Hz, 2H), 7.70 (s, 1H), 7.63 (d, J = 8.0 Hz, 1H), 7.52 (d, J = 8.0 Hz, 2H), 6.98 (dd, J = 8.0, 10.0, Hz, 2H), 6.87 (d, J = 7.2 Hz, 1H), 6.80 (t, J = 7.6 Hz, 1H), 4.32 (s, 2H), 4.09 (s, 2H), 3.81 (s, 3H), 3.62 (s, 2H), 3.03 (brs, 2H), 2.10-2.00 (m, 2H).             | 452.55 | 525.47 | 76.4 | 87.72 | 95.72 | 91.72  |
| <br>Structure3 | 3{3,3,3}  | SJ000311304-1 | 13.84 (brs, 1H), 9.45 (brs, 1H), 9.28 (brs, 2H), 8.55 (d, J = 8.8 Hz, 1H), 8.53 (d, J = 7.2 Hz, 1H), 7.83 (d, J = 8.0 Hz, 2H), 7.70 (s, 1H), 7.63 (dd, J = 8.8, 1.2 Hz, 1H), 7.52 (d, J = 8.0 Hz, 2H), 7.07 (d, J = 8.0, Hz, 1H), 6.96 (d, J = 7.6 Hz, 1H), 6.91-6.86 (m, 2H), 6.06 (s, 2H), 4.32 (s, 2H), 4.10 (s, 2H), 3.64 (s, 2H), 3.07 (brs, 2H), 2.10-2.00 (m, 2H).                     | 450.54 | 523.46 | 61.8 | 91.83 | 100   | 95.915 |

|                                                                                                  |          |               |                                                                                                                                                                                                                                                                                                                                                                                                |        |        |      |       |      |        |
|--------------------------------------------------------------------------------------------------|----------|---------------|------------------------------------------------------------------------------------------------------------------------------------------------------------------------------------------------------------------------------------------------------------------------------------------------------------------------------------------------------------------------------------------------|--------|--------|------|-------|------|--------|
| 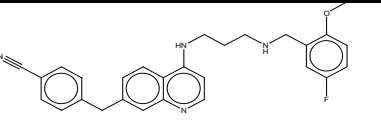<br>Structure4   | 3{3,3,4} | SJ000311305-1 | 13.79 (brs, 1H), 9.39 (brs, 1H), 9.04 (brs, 2H), 8.53 (d, J = 8.0 Hz, 2H), 7.83 (d, J = 8.0 Hz, 2H), 7.70 (s, 1H), 7.64 (dd, J = 8.8, 1.2 Hz, 1H), 7.52 (d, J = 8.0 Hz, 2H), 7.39 (dd, J = 8.8, 2.8 Hz, 1H), 7.24 (dt, J = 8.6, 2.8 Hz, 1H), 7.09 (dd, J = 8.8, 4.4, 1H), 6.88 (d, J = 6.8 Hz, 1H), 4.32 (s, 2H), 4.11 (s, 2H), 3.81 (s, 3H), 3.63 (s, 2H), 3.05 (brs, 2H), 2.10-2.00 (m, 2H). | 454.54 | 527.46 | 52.9 | 81.69 | 91.5 | 86.595 |
| <br>Structure1   | 3{3,4,1} | SJ000311306-1 | 13.82 (brs, 1H), 9.40 (brs, 1H), 9.30 (brs, 2H), 8.53 (d, J = 8.8 Hz, 1H), 8.52 (d, J = 6.8 Hz, 1H), 7.77-7.75 (m, 1H), 7.70 (s, 1H), 7.62 (dd, J = 8.8, 1.2 Hz, 1H), 7.38-7.22 (m, 5H), 6.87 (d, J = 7.2 Hz, 1H), 6.63 (d, J = 3.2 Hz, 1H), 6.51 (dd, J = 3.2, 1.8 Hz, 1H), 4.23 (s, 2H), 4.20 (s, 2H), 3.63 (brs, 2H), 3.02 (brs, 2H), 2.10-1.98 (m, 2H).                                    | 371.48 | 444.4  | 55.9 | 97.13 | 100  | 98.565 |
| <br>Structure2   | 3{3,4,2} | SJ000311307-1 | 13.82 (brs, 1H), 9.38 (brs, 2H), 8.93 (brs, 2H), 8.51 (d, J = 8.0 Hz, 2H), 7.70 (s, 1H), 7.62 (dd, J = 8.8, 1.2 Hz, 1H), 7.38-7.22 (m, 5H), 7.01-6.96 (m, 2H), 6.87 (d, J = 7.2 Hz, 1H), 6.80 (t, J = 8.0 Hz, 1H), 4.20 (s, 2H), 4.09 (s, 2H), 3.81 (s, 3H), 3.62 (brs, 2H), 3.03 (brs, 2H), 2.10-2.00 (m, 2H).                                                                                | 427.54 | 500.46 | 74.4 | 100   | 100  | 100    |
| <br>Structure3   | 3{3,4,3} | SJ000311308-1 | 13.85 (brs, 1H), 9.42 (brs, 1H), 9.31 (brs, 2H), 8.53 (d, J = 8.8 Hz, 1H), 8.51 (d, J = 7.2 Hz, 1H), 7.70 (s, 1H), 7.62 (dd, J = 8.8, 1.2 Hz, 1H), 7.38-7.22 (m, 5H), 7.07 (d, J = 7.6 Hz, 1H), 6.95 (d, J = 7.2 Hz, 1H), 6.88 (t, J = 7.2 Hz, 2H), 6.06 (s, 2H), 4.20 (s, 2H), 4.09 (s, 2H), 3.64 (brs, 2H), 3.06 (brs, 2H), 2.10-2.00 (m, 2H).                                               | 425.53 | 498.45 | 35.7 | 100   | 100  | 100    |
| <br>Structure4   | 3{3,4,4} | SJ000311309-1 | 13.84 (brs, 1H), 9.44 (brs, 1H), 9.14 (brs, 2H), 8.55 (d, J = 8.8 Hz, 1H), 8.51 (d, J = 7.2 Hz, 1H), 7.70 (s, 1H), 7.62 (dd, J = 8.8, 1.2 Hz, 1H), 7.41 (dd, J = 8.8, 3.2 Hz, 1H), 7.38-7.19 (m, 6H), 7.08 (dd, J = 9.2, 4.4 Hz, 1H), 6.88 (d, J = 7.2 Hz, 1H), 4.20 (s, 2H), 4.11 (s, 2H), 3.81 (s, 3H), 3.65 (brs, 2H), 3.04 (brs, 2H), 2.10-2.00 (m, 2H).                                   | 429.53 | 502.45 | 30.1 | 100   | 100  | 100    |
| <br>Structure1  | 3{3,5,1} | SJ000311318-1 | 13.83 (brs, 1H), 9.32 (brs, 3H), 8.53 (d, J = 8.8 Hz, 1H), 8.52 (d, J = 7.2 Hz, 1H), 7.76 (brs, 1H), 7.69 (brs, 1H), 7.60 (dd, J = 8.8, 1.2 Hz, 1H), 6.89-6.86 (m, 3H), 6.63 (d, J = 3.2 Hz, 1H), 6.52 (dd, J = 3.2, 2.0 Hz, 1H), 4.23 (s, 2H), 4.11 (brs, 2H), 3.63 (brs, 2H), 3.02 (brs, 2H), 2.24 (s, 6H), 2.08-2.00 (m, 2H).                                                               | 399.53 | 472.45 | 80.7 | 96.16 | 100  | 98.08  |
| <br>Structure2 | 3{3,5,2} | SJ000311319-1 | 13.82 (brs, 1H), 9.38 (brs, 2H), 8.96 (brs, 2H), 8.52-8.49 (m, 2H), 7.69 (s, 1H), 7.60 (d, J = 8.8 Hz, 1H), 6.99 (d, J = 8.0 Hz, 2H), 6.89-6.85 (m, 4H), 6.80 (t, J = 8.0 Hz, 1H), 4.11 (s, 2H), 4.09 (brs, 2H), 3.81 (s, 3H), 3.62 (brs, 2H), 3.03 (brs, 2H), 2.24 (s, 6H), 2.11-2.02 (m, 2H).                                                                                                | 455.59 | 528.51 | 40.3 | 100   | 100  | 100    |
| <br>Structure3 | 3{3,5,3} | SJ000311320-1 | 13.81 (brs, 1H), 9.42 (brs, 1H), 9.30 (brs, 2H), 8.53 (d, J = 8.8 Hz, 1H), 8.51 (d, J = 7.2 Hz, 1H), 7.69 (s, 1H), 7.60 (d, J = 8.4 Hz, 1H), 7.07 (d, J = 8.0 Hz, 1H), 6.96 (d, J = 7.6 Hz, 1H), 6.90-6.86 (m, 5H), 6.91-6.87 (m, 2H), 6.06 (s, 2H), 4.11 (s, 2H), 4.10 (brs, 2H), 3.64 (brs, 2H), 3.07 (brs, 2H), 2.24 (s, 6H), 2.10-2.02 (m, 2H).                                            | 453.58 | 526.5  | 80.9 | 100   | 100  | 100    |

|                                                                                                  |          |               |                                                                                                                                                                                                                                                                                                                                                                               |        |        |      |       |       |        |
|--------------------------------------------------------------------------------------------------|----------|---------------|-------------------------------------------------------------------------------------------------------------------------------------------------------------------------------------------------------------------------------------------------------------------------------------------------------------------------------------------------------------------------------|--------|--------|------|-------|-------|--------|
| 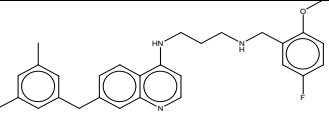<br>Structure4   | 3{3,5,4} | SJ000311321-1 | 13.79 (brs, 1H), 9.43 (brs, 1H), 9.10 (brs, 2H), 8.54-8.50 (m, 2H), 7.69 (s, 1H), 7.61 (dd, J = 8.8, 1.2 Hz, 1H), 7.40 (dd, J = 9.2, 3.6 Hz, 1H), 7.24 (dt, J = 8.8, 3.2 Hz, 1H), 7.09 (dd, J = 9.2, 4.4 Hz, 1H), 6.90-6.87 (m, 4H), 4.11 (brs, 4H), 3.81 (s, 3H), 3.65 (brs, 2H), 3.04 (brs, 2H), 2.24 (s, 3H), 2.11-2.04 (m, 2H).                                           | 457.58 | 530.5  | 29.6 | 100   | 100   | 100    |
| <br>Structure1   | 3{3,6,1} | SJ000311322-1 | 13.81 (brs, 1H), 9.46 (brs, 1H), 9.33 (brs, 2H), 8.56 (d, J = 8.8 Hz, 1H), 8.52 (d, J = 7.2 Hz, 1H), 7.76 (brs, 1H), 7.61-7.50 (m, 5H), 7.29 (dt, J = 8.4, 2.8 Hz, 1H), 6.87 (d, J = 7.2 Hz, 1H), 6.65 (d, J = 3.2 Hz, 1H), 6.52 (dd, J = 3.2, 2.0 Hz, 1H), 4.32 (s, 2H), 4.23 (brs, 2H), 3.63 (brs, 2H), 3.03 (brs, 2H), 2.09-2.00 (m, 2H).                                  | 423.91 | 496.83 | 80.5 | 95.3  | 100   | 97.65  |
| <br>Structure2   | 3{3,6,2} | SJ000311323-1 | 13.75 (brs, 1H), 9.39 (brs, 2H), 8.88 (brs, 2H), 8.52-8.49 (m, 2H), 7.61-7.51 (m, 4H), 7.29 (dt, J = 8.0, 2.8 Hz, 1H), 7.01-6.96 (m, 2H), 6.87 (d, J = 8.0 Hz, 1H), 6.80 (t, J = 8.0 Hz, 1H), 4.32 (s, 2H), 4.09 (brs, 2H), 3.81 (s, 3H), 3.62 (brs, 2H), 3.03 (brs, 2H), 2.09-2.02 (m, 2H).                                                                                  | 479.97 | 552.89 | 77.5 | 100   | 100   | 100    |
| <br>Structure3   | 3{3,6,3} | SJ000311324-1 | 13.77 (brs, 1H), 9.43 (brs, 1H), 9.27 (brs, 2H), 8.55 (d, J = 8.8 Hz, 1H), 8.52 (d, J = 7.2 Hz, 1H), 7.61-7.50 (m, 5H), 7.29 (dt, J = 8.4, 2.8 Hz, 1H), 7.06 (d, J = 8.0 Hz, 1H), 6.96 (dd, J = 8.4, 1.2 Hz, 1H), 6.91-6.87 (m, 2H), 6.06 (s, 2H), 4.32 (s, 2H), 4.10 (brs, 2H), 3.64 (brs, 2H), 3.07 (brs, 2H), 2.10-2.02 (m, 2H).                                           | 477.96 | 550.88 | 79.8 | 100   | 100   | 100    |
| <br>Structure4   | 3{3,6,4} | SJ000311325-1 | 13.78 (brs, 1H), 9.44 (brs, 1H), 9.11 (brs, 2H), 8.55 (d, J = 8.8 Hz, 1H), 8.52 (d, J = 7.2 Hz, 1H), 7.61-7.50 (m, 4H), 7.40 (dd, J = 8.8, 3.2 Hz, 1H), 7.29 (dt, J = 8.4, 2.8 Hz, 1H), 7.24 (dt, J = 8.4, 3.2 Hz, 1H), 7.09 (dd, J = 8.8, 4.4 Hz, 1H), 6.88 (d, J = 7.2, 1H), 4.32 (s, 2H), 4.11 (s, 2H), 3.81 (s, 3H), 3.64 (brs, 2H), 3.05 (brs, 2H), 2.11-2.04 (m, 2H).   | 481.96 | 554.88 | 21.3 | 100   | 100   | 100    |
| <br>Structure1  | 3{3,7,1} | SJ000311246-1 | 14.01 (brs, 1H), 9.48 (brs, 3H), 8.57 (d, J = 9.2 Hz, 1H), 8.53 (d, J = 7.2 Hz, 1H), 7.76 (d, J = 1.2 Hz, 1H), 7.75 (s, 1H), 7.61 (d, J = 8.4 Hz, 1H), 6.87 (d, J = 7.2 Hz, 1H), 6.65 (d, J = 3.2 Hz, 1H), 6.52 (dd, J = 3.2, 2.0 Hz, 1H), 4.24 (brs, 2H), 3.64 (brs, 2H), 3.03 (brs, 2H), 2.84-2.80 (m, 2H), 2.12-2.02 (m, 2H), 1.62-1.53 (m, 3H), 0.94 (d, J = 6.0 Hz, 6H). | 351.49 | 424.41 | 79.4 | 66.96 | 85.03 | 75.995 |
| <br>Structure2 | 3{3,7,2} | SJ000311247-1 | 13.99 (brs, 1H), 9.44 (brs, 1H), 9.37 (brs, 1H), 9.05 (brs, 2H), 8.55-8.50 (m, 2H), 7.71 (brs, 1H), 7.61 (d, J = 8.8 Hz, 1H), 7.03-7.00 (m, 2H), 6.87 (d, J = 8.0 Hz, 1H), 6.81 (t, J = 8.0 Hz, 1H), 4.10 (brs, 2H), 3.82 (s, 3H), 3.63 (brs, 2H), 3.04 (brs, 2H), 2.84-2.80 (m, 2H), 2.12-2.02 (m, 2H), 1.62-1.53 (m, 3H), 0.95 (d, J = 6.0 Hz, 6H).                         | 407.55 | 480.47 | 76.4 | 89.95 | 100   | 94.975 |
| <br>Structure3 | 3{3,7,3} | SJ000311248-1 | 13.95 (brs, 1H), 9.45 (brs, 3H), 8.59-8.51 (m, 2H), 7.73 (s, 1H), 7.60 (d, J = 8.8 Hz, 1H), 7.10 (d, J = 8.0 Hz, 1H), 6.95 (dd, J = 8.4, 1.2 Hz, 1H), 6.90-6.86 (m, 2H), 6.06 (s, 2H), 4.09 (brs, 2H), 3.65 (brs, 2H), 3.06 (brs, 2H), 2.83-2.79 (m, 2H), 2.12-2.02 (m, 2H), 1.61-1.52 (m, 3H), 0.95 (d, J = 6.0 Hz, 6H).                                                     | 405.54 | 478.46 | 78.2 | 96.46 | 100   | 98.23  |

|                                                                                                  |          |               |                                                                                                                                                                                                                                                                                                                                                                                                     |        |        |      |       |       |        |
|--------------------------------------------------------------------------------------------------|----------|---------------|-----------------------------------------------------------------------------------------------------------------------------------------------------------------------------------------------------------------------------------------------------------------------------------------------------------------------------------------------------------------------------------------------------|--------|--------|------|-------|-------|--------|
| 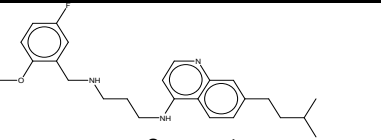<br>Structure4   | 3{3,7,4} | SJ000311249-1 | 13.94 (brs, 1H), 9.46 (brs, 1H), 9.22 (brs, 2H), 8.56-8.51 (m, 2H), 7.73 (s, 1H), 7.60 (d, J = 8.4 Hz, 1H), 7.43 (dd, J = 8.8, 3.2 Hz, 1H), 7.24 (dt, J = 8.4, 3.2 Hz, 1H), 7.09 (dd, J = 9.2, 4.4 Hz, 1H), 6.88 (d, J = 7.2, 1H), 4.11 (s, 2H), 3.81 (s, 3H), 3.65 (brs, 2H), 3.04 (brs, 2H), 2.83-2.79 (m, 2H), 2.12-2.02 (m, 2H), 1.61-1.52 (m, 3H), 0.94 (d, J = 6.0 Hz, 6H).                   | 409.54 | 482.46 | 79.1 | 96.75 | 100   | 98.375 |
| <br>Structure1   | 3{3,8,1} | SJ000311250-1 | 13.97 (brs, 1H), 9.47 (brs, 1H), 9.40 (brs, 2H), 8.55 (d, J = 9.2 Hz, 1H), 8.53 (d, J = 7.2 Hz, 1H), 7.76 (s, 1H), 7.68 (s, 1H), 7.56 (d, J = 8.4 Hz, 1H), 6.87 (d, J = 7.2 Hz, 1H), 6.64 (d, J = 3.2 Hz, 1H), 6.51 (dd, J = 3.2, 2.0 Hz, 1H), 4.23 (brs, 2H), 3.64 (brs, 2H), 3.02 (brs, 2H), 2.69 (d, J = 7.2 Hz, 2H), 2.12-2.02 (m, 2H), 1.70-1.55 (m, 6H), 1.24-1.10 (m, 3H), 1.3-0.93 (m, 2H). | 377.53 | 450.45 | 76.5 | 77.78 | 95.93 | 86.855 |
| <br>Structure2   | 3{3,8,2} | SJ000311251-1 | 13.97 (brs, 1H), 9.44 (brs, 1H), 9.27 (brs, 1H), 9.03 (brs, 2H), 8.55-8.50 (m, 2H), 7.69 (brs, 1H), 7.56 (d, J = 8.8 Hz, 1H), 7.02-6.99 (m, 2H), 6.87 (d, J = 8.0 Hz, 1H), 6.81 (t, J = 8.0 Hz, 1H), 4.10 (brs, 2H), 3.82 (s, 3H), 3.63 (brs, 2H), 3.04 (brs, 2H), 2.70 (d, J = 7.2 Hz, 2H), 2.12-2.02 (m, 2H), 1.70-1.55 (m, 6H), 1.24-1.10 (m, 3H), 1.3-0.93 (m, 2H).                             | 433.59 | 506.51 | 75.4 | 90.63 | 100   | 95.315 |
| <br>Structure3   | 3{3,8,3} | SJ000311252-1 | 14.02 (brs, 1H), 9.51 (brs, 3H), 8.61-8.52 (m, 2H), 7.70 (s, 1H), 7.57 (d, J = 8.8 Hz, 1H), 7.12 (dd, J = 8.0, 3.2 Hz, 1H), 6.97 (dd, J = 8.4, 1.2 Hz, 1H), 6.92-6.86 (m, 2H), 6.08 (s, 2H), 4.11 (brs, 2H), 3.66 (brs, 2H), 3.08 (brs, 2H), 2.70 (d, J = 7.2 Hz, 2H), 2.12-2.02 (m, 2H), 1.70-1.55 (m, 6H), 1.24-1.10 (m, 3H), 1.3-0.93 (m, 2H).                                                   | 431.58 | 504.5  | 78.2 | 91.37 | 100   | 95.685 |
| <br>Structure4   | 3{3,8,4} | SJ000311253-1 | 13.91 (brs, 1H), 9.45 (brs, 1H), 9.19 (brs, 2H), 8.59-8.51 (m, 2H), 7.67 (s, 1H), 7.56 (d, J = 8.4 Hz, 1H), 7.42 (dd, J = 8.8, 3.2 Hz, 1H), 7.24 (dt, J = 8.4, 3.2 Hz, 1H), 7.09 (dd, J = 9.2, 4.4 Hz, 1H), 6.88 (d, J = 7.2, 1H), 4.11 (s, 2H), 3.81 (s, 3H), 3.65 (brs, 2H), 3.05 (brs, 2H), 2.69 (d, J = 7.2 Hz, 2H), 2.12-2.02 (m, 2H), 1.70-1.55 (m, 6H), 1.24-1.10 (m, 3H), 1.3-0.93 (m, 2H). | 435.58 | 508.5  | 78.8 | 80.2  | 98.62 | 89.41  |
| <br>Structure1  | 3{3,9,1} | SJ000311254-1 | 13.88 (brs, 1H), 9.42 (brs, 3H), 8.53 (d, J = 8.4 Hz, 1H), 8.50 (d, J = 6.8 Hz, 1H), 7.76 (d, J = 1.6 Hz, 1H), 7.69 (s, 1H), 7.63 (dd, J = 8.8, 1.2 Hz, 1H), 7.33-7.23 (m, 5H), 7.20-7.16 (m, 1H), 6.86 (d, J = 7.2 Hz, 1H), 6.63 (d, J = 3.2 Hz, 1H), 6.51 (dd, J = 3.2, 2.0 Hz, 1H), 4.23 (brs, 2H), 3.63 (brs, 2H), 3.15-3.11 (m, 2H), 3.05-2.97 (m, 4H), 2.07-2.00 (m, 2H).                     | 385.51 | 458.43 | 55.5 | 66.53 | 78.46 | 72.495 |
| <br>Structure2 | 3{3,9,2} | SJ000311255-1 | 13.83 (brs, 1H), 9.36 (brs, 2H), 8.94 (brs, 2H), 8.51 (d, J = 7.2 Hz, 1H), 8.49 (d, J = 9.2 Hz, 1H), 7.69 (d, J = 1.6 Hz, 1H), 7.64 (dd, J = 9.2, 1.6 Hz, 1H), 7.33-7.24 (m, 5H), 7.21-7.17 (m, 1H), 7.02-6.98 (m, 2H), 6.86 (d, J = 7.2 Hz, 1H), 6.82 (t, J = 8.0 Hz, 1H), 4.12 (s, 2H), 3.82 (s, 3H), 3.63 (brs, 2H), 3.16-3.12 (m, 2H), 3.08-2.98 (m, 4H), 2.09-2.02 (m, 2H).                    | 441.57 | 514.49 | 63.3 | 90.63 | 100   | 95.315 |
| <br>Structure3 | 3{3,9,3} | SJ000311256-1 | 13.86 (brs, 1H), 9.42 (brs, 1H), 9.14 (brs, 2H), 8.53 (d, J = 9.6 Hz, 1H), 8.52 (d, J = 6.8 Hz, 1H), 7.69 (d, J = 1.6 Hz, 1H), 7.64 (dd, J = 8.8, 1.6 Hz, 1H), 7.42 (dd, J = 8.8, 3.2 Hz, 1H), 7.33-7.24 (m, 5H), 7.22-7.17 (m, 1H), 7.09 (dd, J = 9.2, 4.4 Hz, 1H), 6.88 (d, J = 7.2 Hz, 1H), 4.12 (s, 2H), 3.82 (s, 3H), 3.65 (brs, 2H), 3.16-3.12 (m, 2H), 3.08-2.98 (m, 4H), 2.12-2.04 (m, 2H). | 439.56 | 512.48 | 67.5 | 96.89 | 100   | 98.445 |

|                                                                                                    |          |               |                                                                                                                                                                                                                                                                                                                                            |        |        |      |       |     |       |
|----------------------------------------------------------------------------------------------------|----------|---------------|--------------------------------------------------------------------------------------------------------------------------------------------------------------------------------------------------------------------------------------------------------------------------------------------------------------------------------------------|--------|--------|------|-------|-----|-------|
| 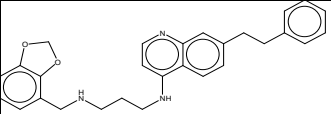 <p>Structure4</p> | 3{3,9,4} | SJ000311257-1 | <p>13.92 (brs, 1H), 9.48 (brs, 1H), 9.71 (brs, 2H), 8.56-8.50 (m, 2H), 7.70 (d, J = 1.6 Hz, 1H), 7.63 (dd, J = 8.8, 1.6 Hz, 1H), 7.33-7.23 (m, 5H), 7.20-7.16 (m, 1H), 7.10 (d, J = 7.6 Hz, 1H), 6.95 (d, J = 7.6 Hz, 1H), 6.88 (t, J = 7.6 Hz, 1H), 6.05 (s, 2H), 4.09 (s, 2H), 3.65 (brs, 2H), 3.16-2.97 (m, 6H), 2.15-2.05 (m, 2H).</p> | 443.56 | 516.48 | 67.0 | 97.98 | 100 | 98.99 |
|----------------------------------------------------------------------------------------------------|----------|---------------|--------------------------------------------------------------------------------------------------------------------------------------------------------------------------------------------------------------------------------------------------------------------------------------------------------------------------------------------|--------|--------|------|-------|-----|-------|

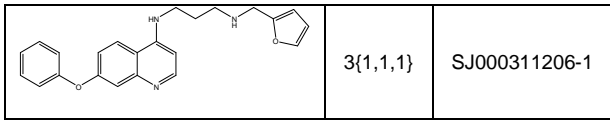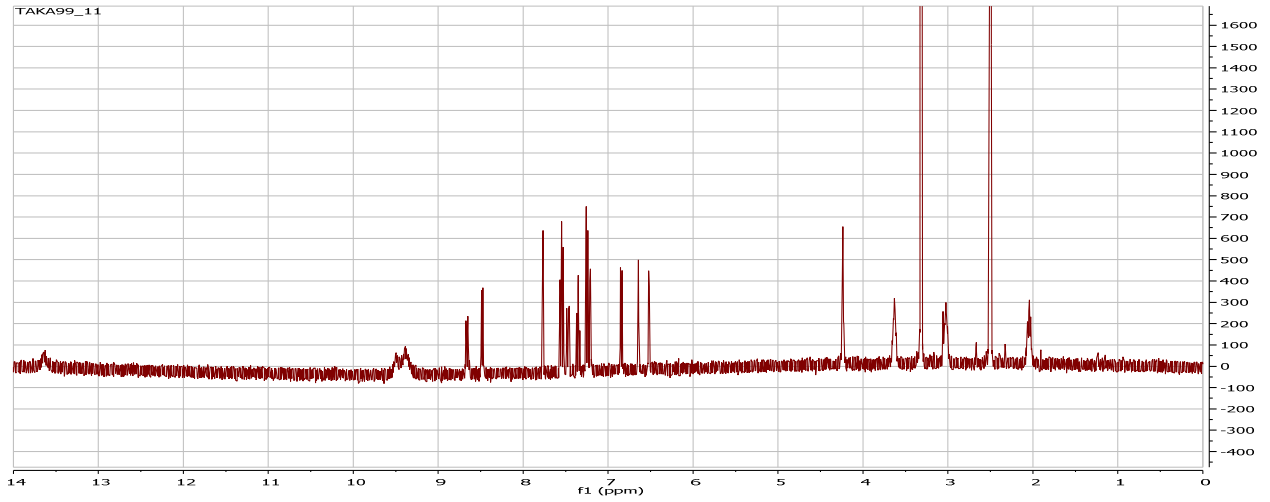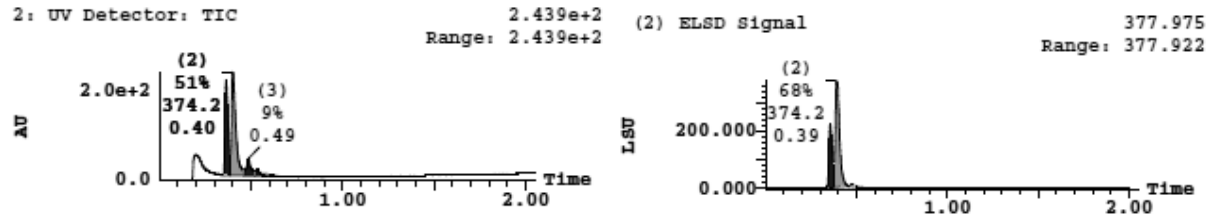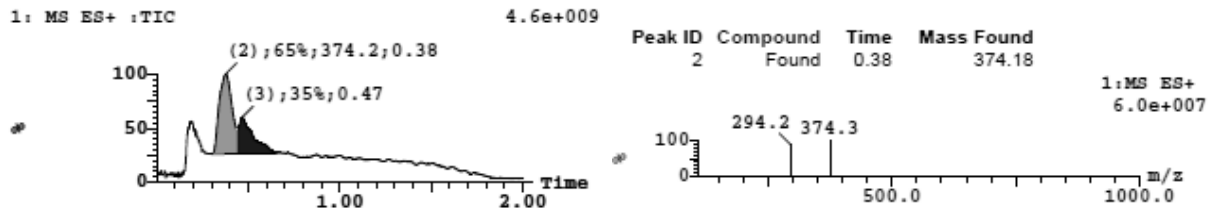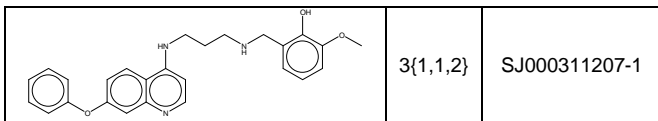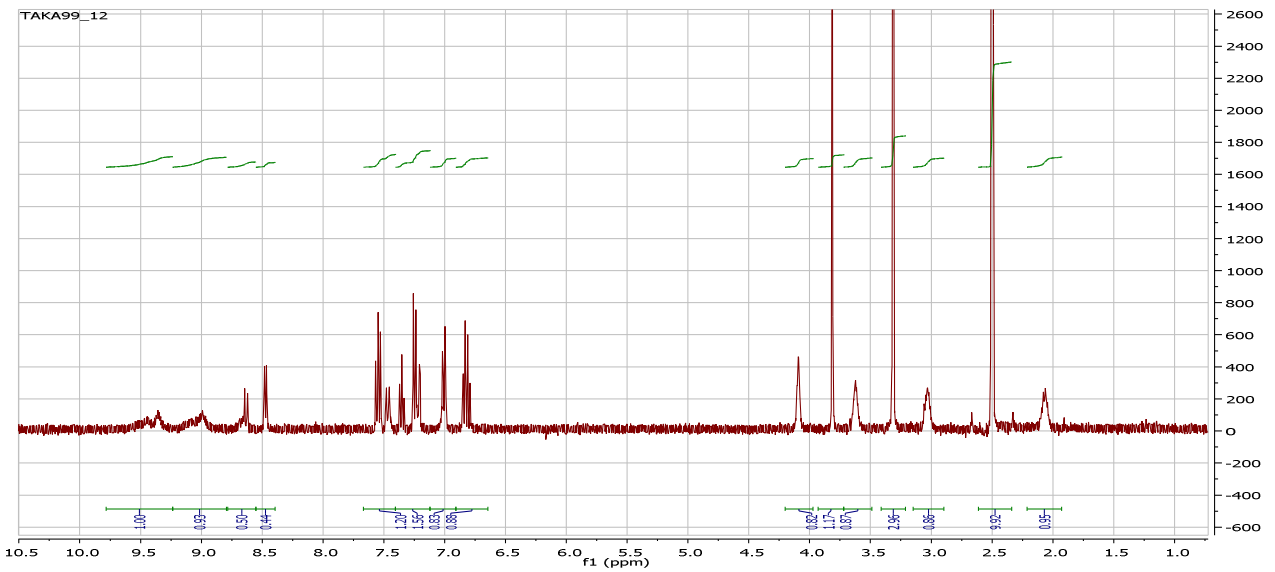

2: UV Detector: TIC

3.081e+2  
Range: 3.08e+2

(2) ELSD signal

1314.627  
Range: 1314.614

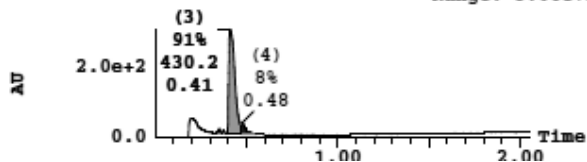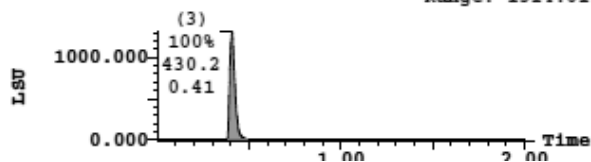

| Peak ID | Compound | Time | Mass Found |
|---------|----------|------|------------|
| 3       | Found    | 0.40 | 430.21     |

1:MS ES+  
8.4e+007

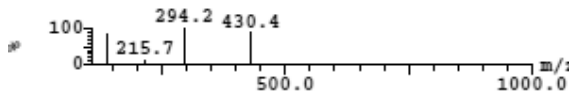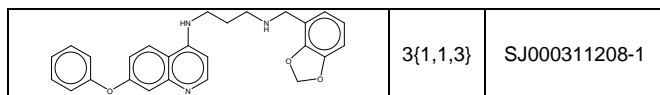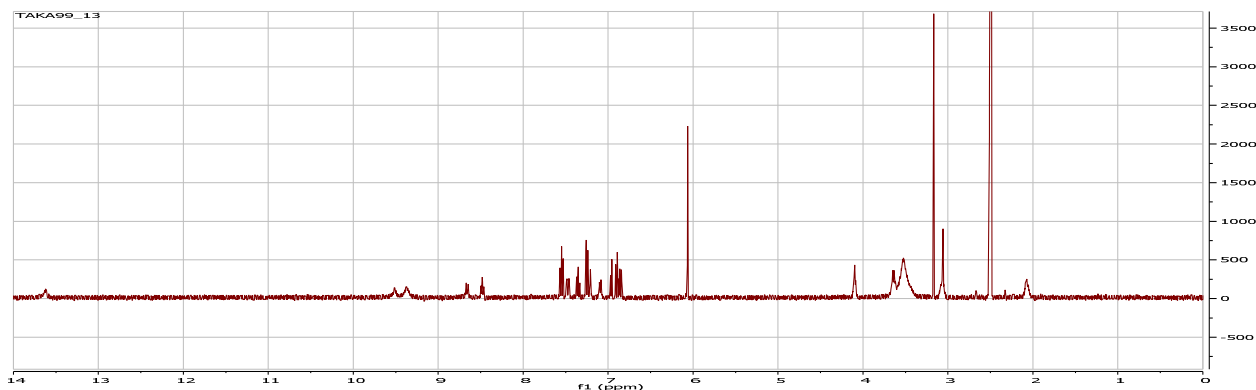

2: UV Detector: TIC

3.404e+2  
Range: 3.404e+2

(2) ELSD signal

1973.276  
Range: 1973.138

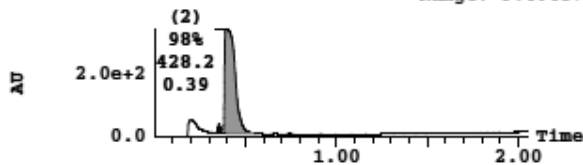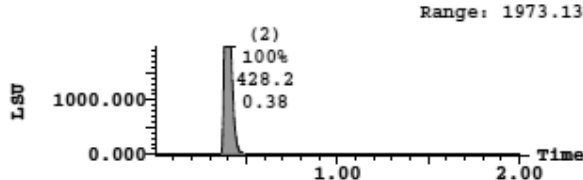

| Peak ID | Compound | Time | Mass Found |
|---------|----------|------|------------|
| 2       | Found    | 0.38 | 428.19     |

1:MS ES+  
9.9e+007

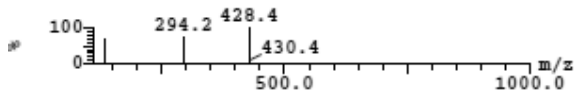

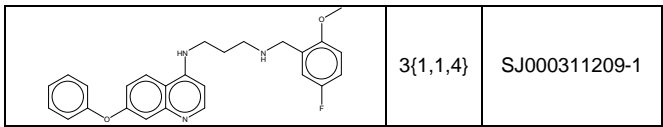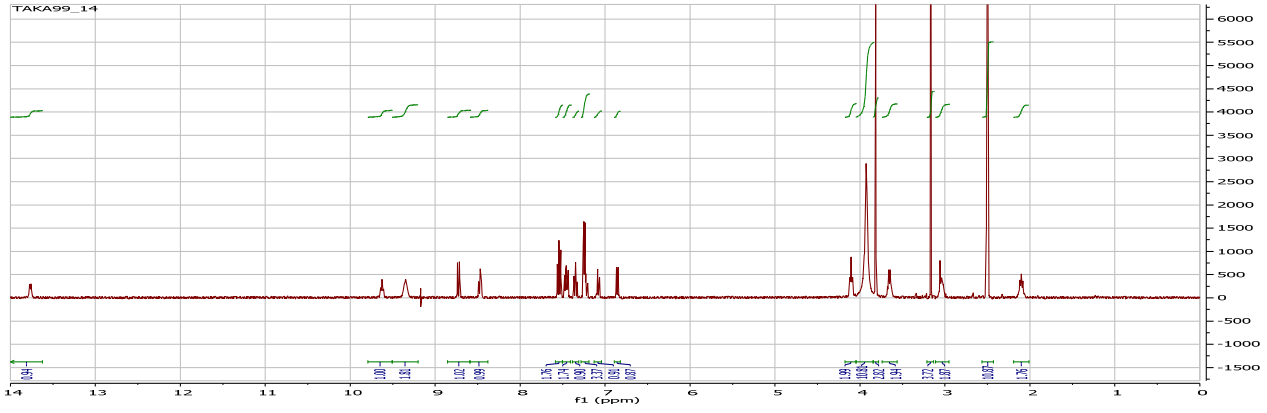

2: UV Detector: TIC 3.347e+2 (2) ELSD Signal 1973.105  
 Range: 3.346e+2 Range: 1973.046

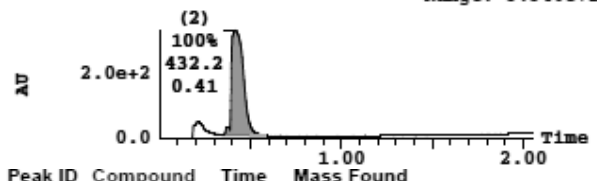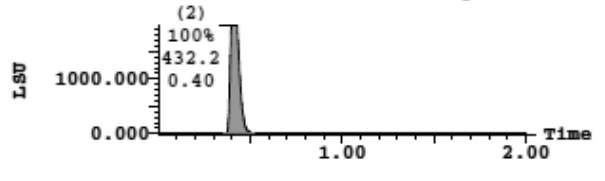

| Peak ID | Compound Found | Time | Mass Found |
|---------|----------------|------|------------|
| 2       | Found          | 0.40 | 432.20     |

1:MS ES+  
1.0e+008

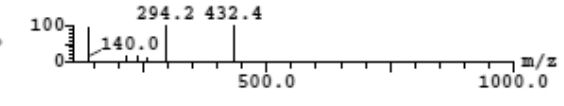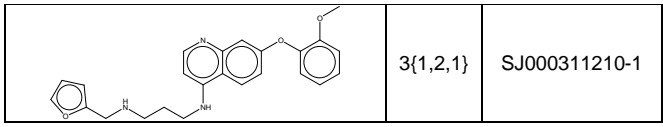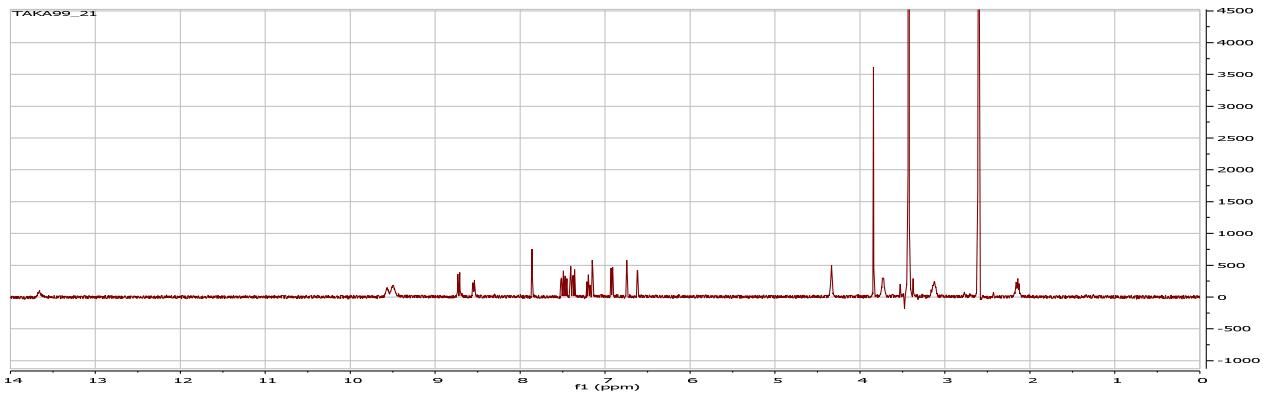



2: UV Detector: TIC

3.369e+2  
Range: 3.369e+2

(2) ELSD signal

1973.365  
Range: 1973.325

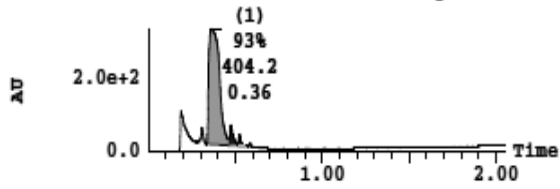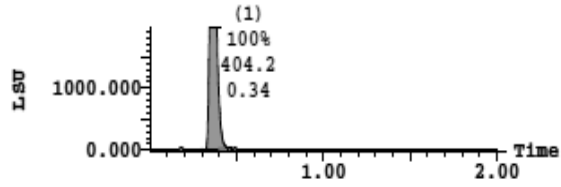

| Peak ID | Compound | Time | Mass Found |
|---------|----------|------|------------|
| 1       | Found    | 0.34 | 404.19     |

1:MS ES+  
7.6e+007

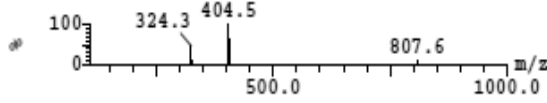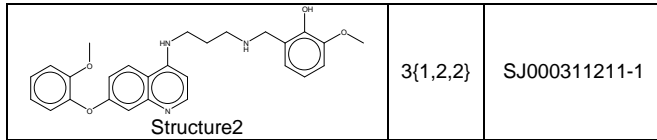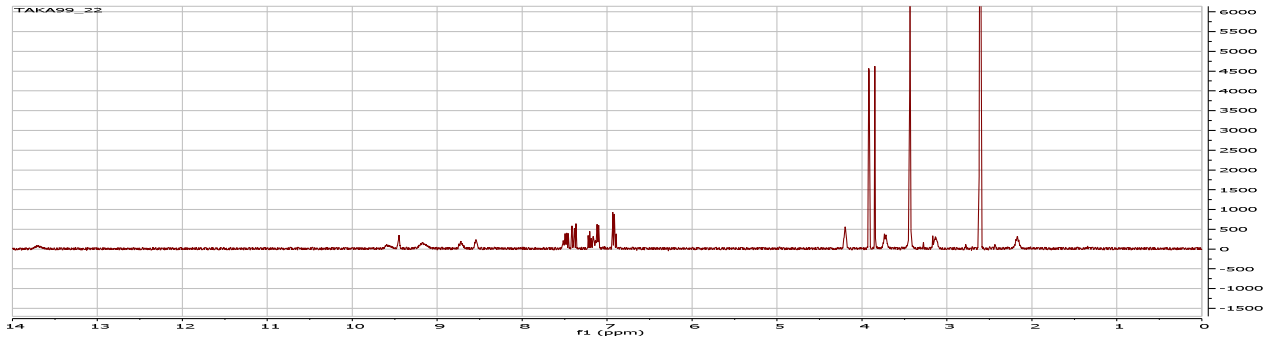

2: UV Detector: TIC

3.1e+2  
Range: 3.1e+2

(2) ELSD signal

1447.316  
Range: 1447.287

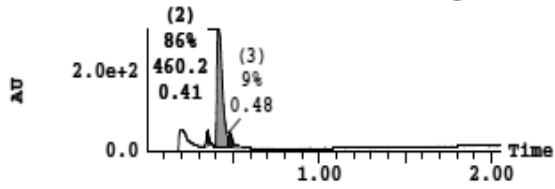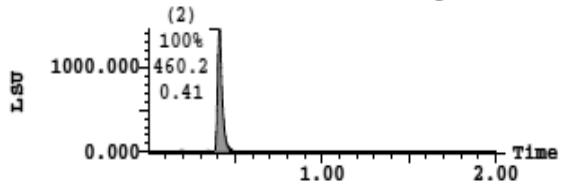

| Peak ID | Compound | Time | Mass Found |
|---------|----------|------|------------|
| 2       | Found    | 0.40 | 460.22     |

1:MS ES+  
7.3e+007

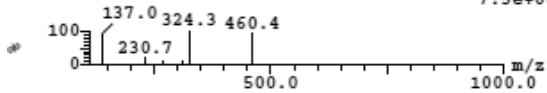

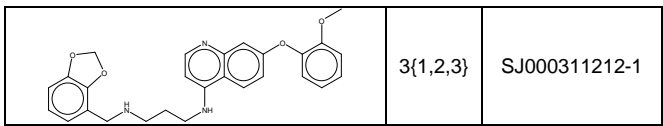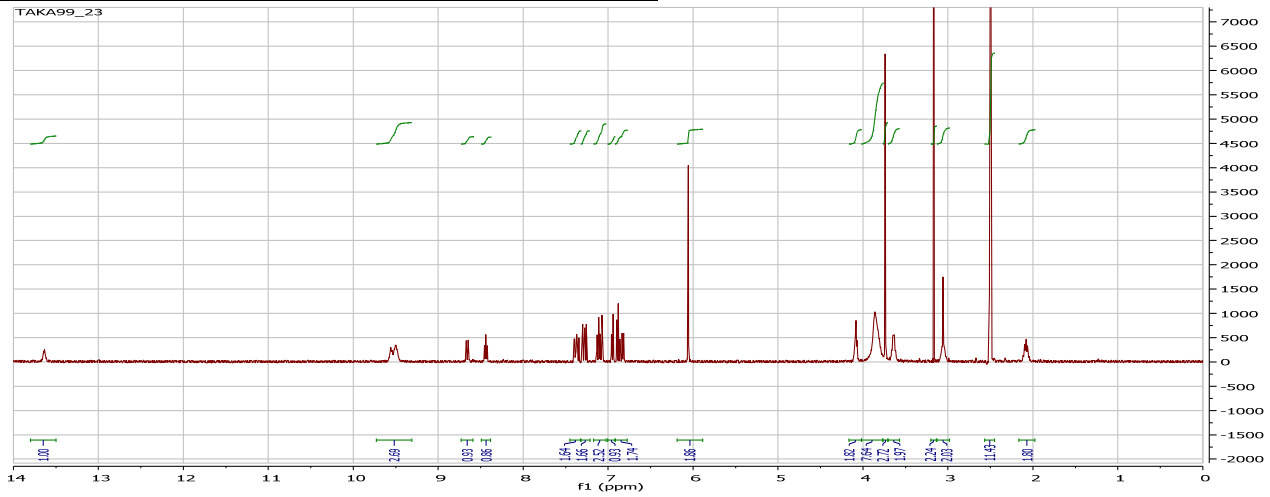

2: UV Detector: TIC

3.311e+2 (2) ELSD signal  
Range: 3.311e+2

1962.653  
Range: 1962.614

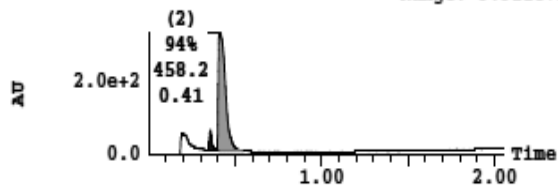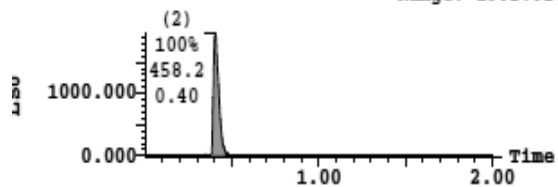

| Peak ID | Compound | Time | Mass Found |
|---------|----------|------|------------|
| 2       | Found    | 0.40 | 458.20     |

1:MS ES+  
9.0e+007

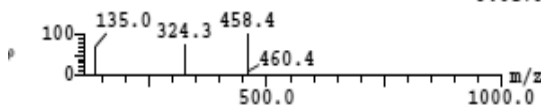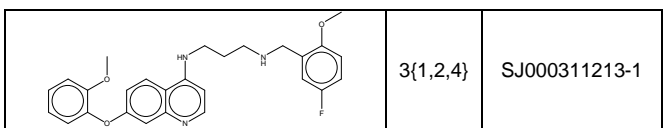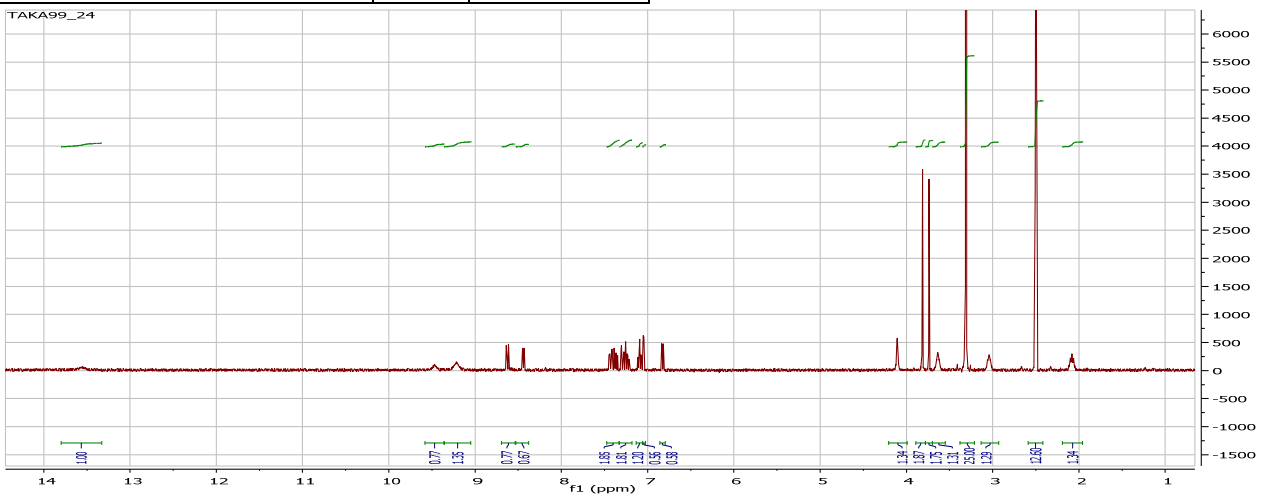

2: UV Detector: TIC

3.155e+2 (2) ELSD signal  
Range: 3.155e+2

1474.565  
Range: 1474.477

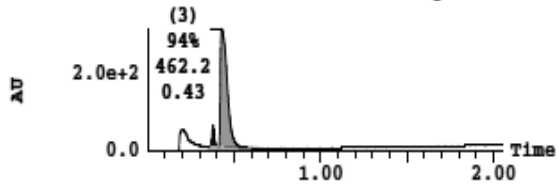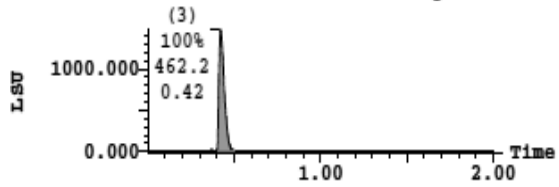

| Peak ID | Compound | Time | Mass Found |
|---------|----------|------|------------|
| 3       | Found    | 0.41 | 462.21     |

1:MS ES+  
8.0e+007

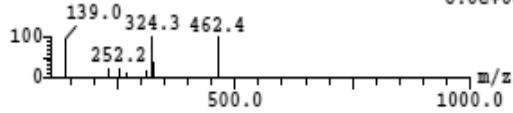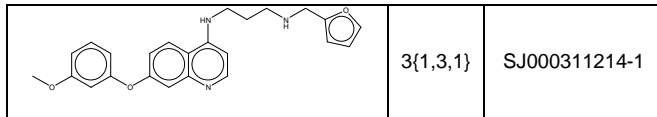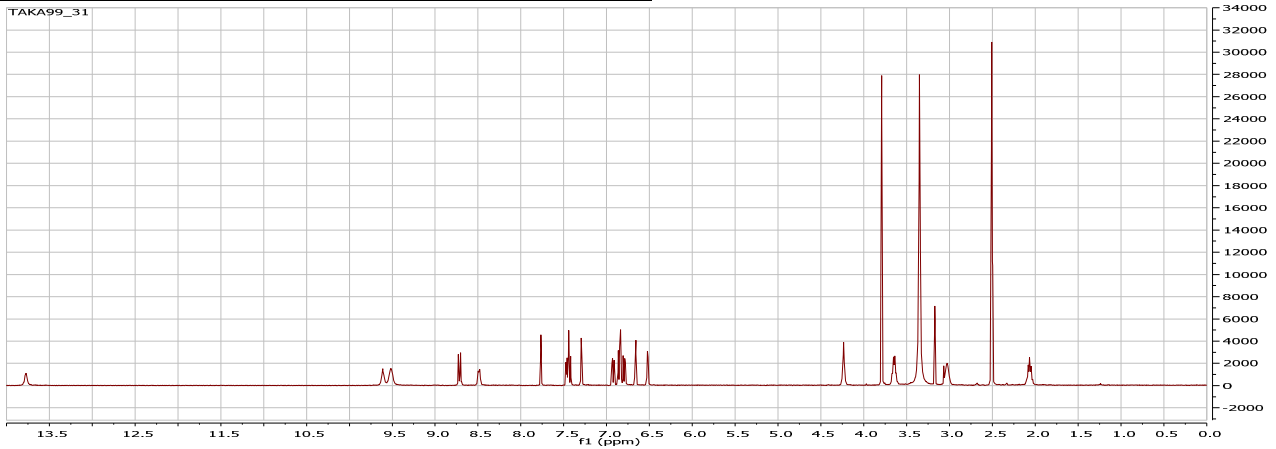

2: UV Detector: TIC

3.271e+2 (2) ELSD signal  
Range: 3.271e+2

1972.963  
Range: 1972.904

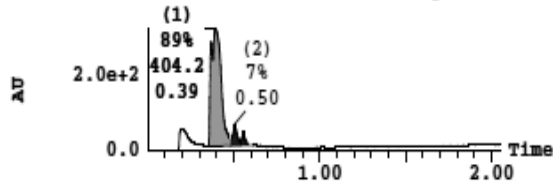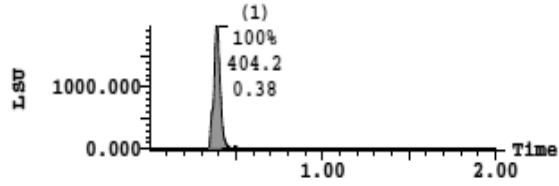

| Peak ID | Compound | Time | Mass Found |
|---------|----------|------|------------|
| 1       | Found    | 0.37 | 404.19     |

1:MS ES+  
7.0e+007

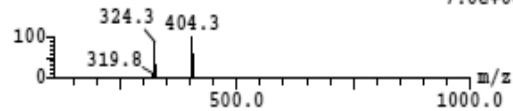

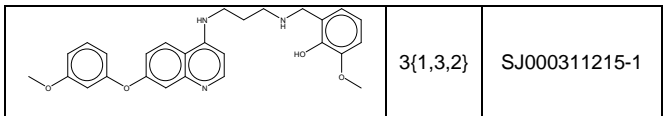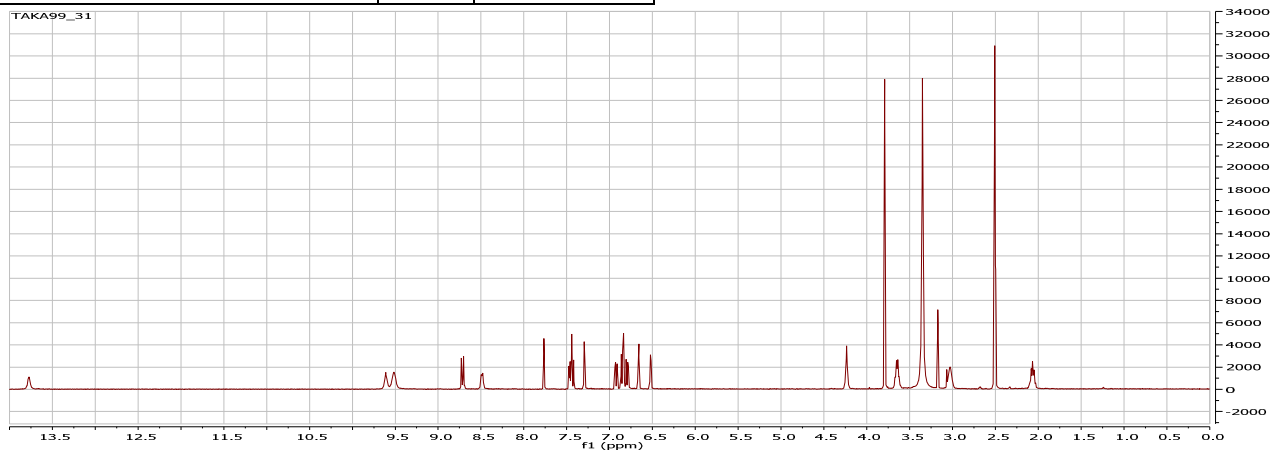

2: UV Detector: TIC

3.009e+2 (2) ELSD Signal  
Range: 3.009e+2

1001.676  
Range: 1001.585

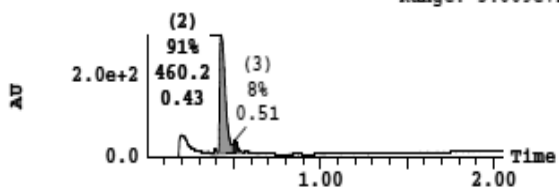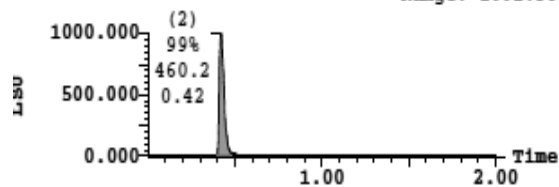

| Peak ID | Compound | Time | Mass Found |
|---------|----------|------|------------|
| 2       | Found    | 0.41 | 460.22     |

1:MS ES+  
7.8e+007

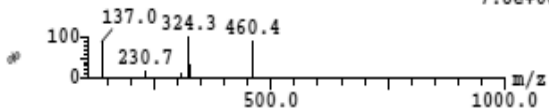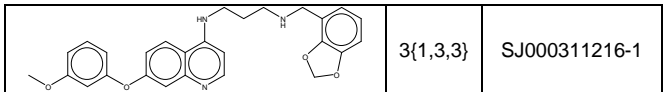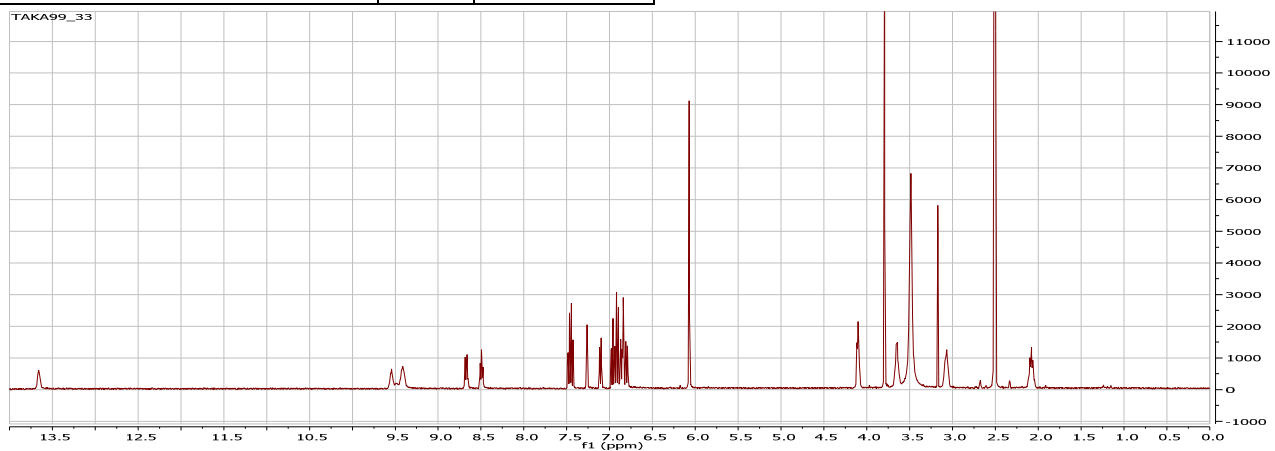

2: UV Detector: TIC

3.197e+2  
Range: 3.197e+2

(2) ELSD Signal

1378.798  
Range: 1378.743

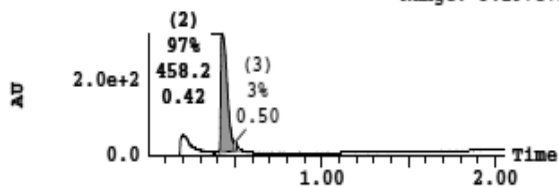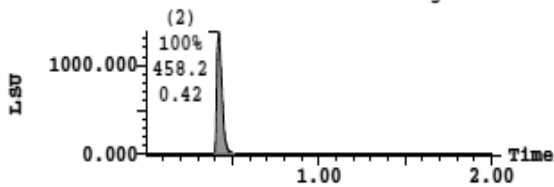

| Peak ID | Compound | Time | Mass Found |
|---------|----------|------|------------|
| 2       | Found    | 0.41 | 458.20     |

1:MS ES+  
9.0e+007

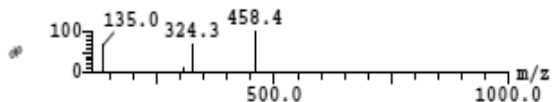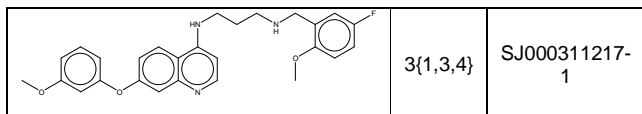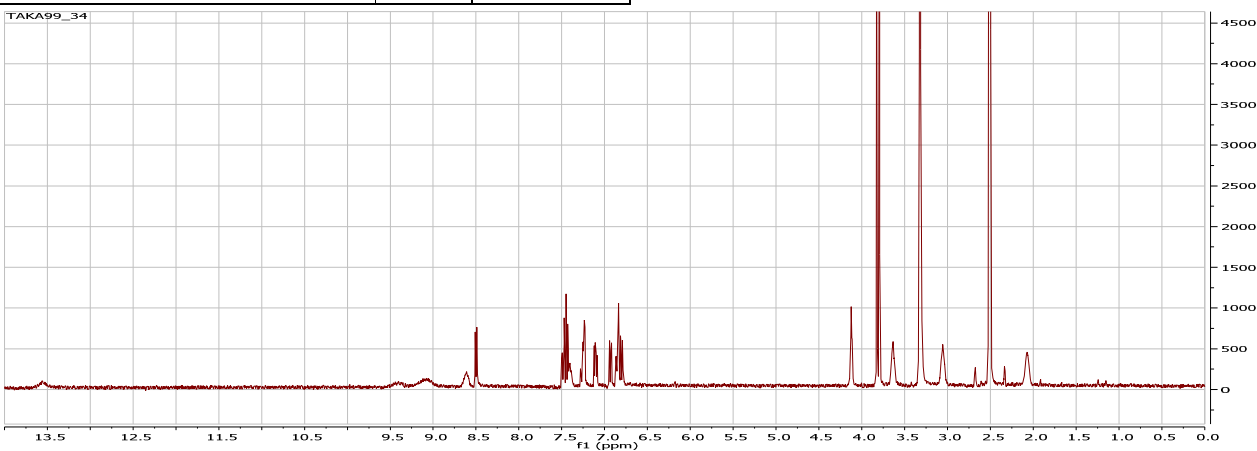

2: UV Detector: TIC

3.213e+2  
Range: 3.213e+2

(2) ELSD Signal

1742.850  
Range: 1742.815

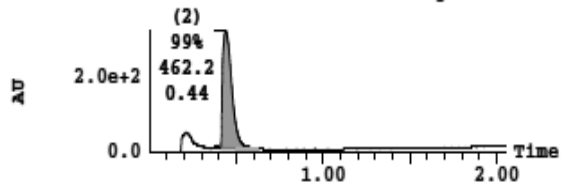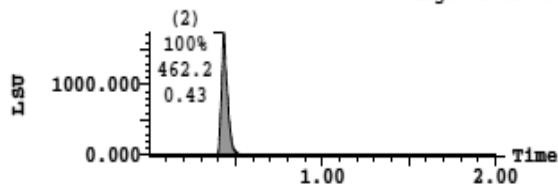

| Peak ID | Compound | Time | Mass Found |
|---------|----------|------|------------|
| 2       | Found    | 0.42 | 462.21     |

1:MS ES+  
9.4e+007

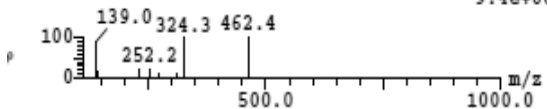

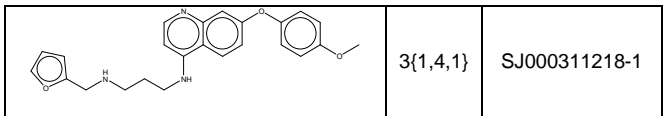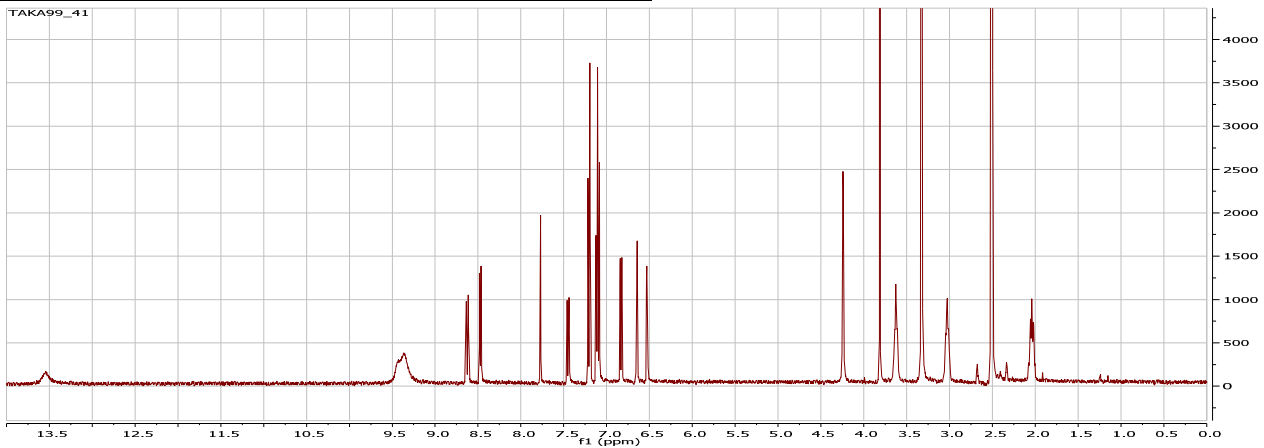

2: UV Detector: TIC

3.436e+2 (2) ELSD signal  
Range: 3.436e+2

1973.094  
Range: 1973.054

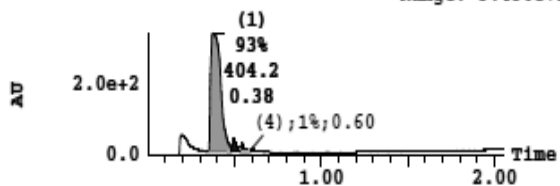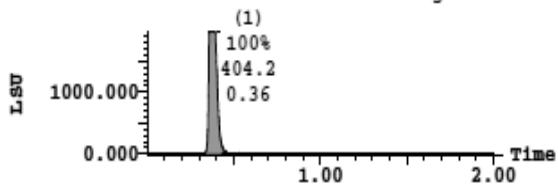

| Peak ID | Compound | Time | Mass Found |
|---------|----------|------|------------|
| 1       | Found    | 0.38 | 404.19     |

1:MS ES+  
8.5e+007

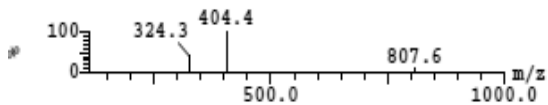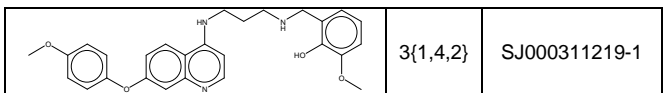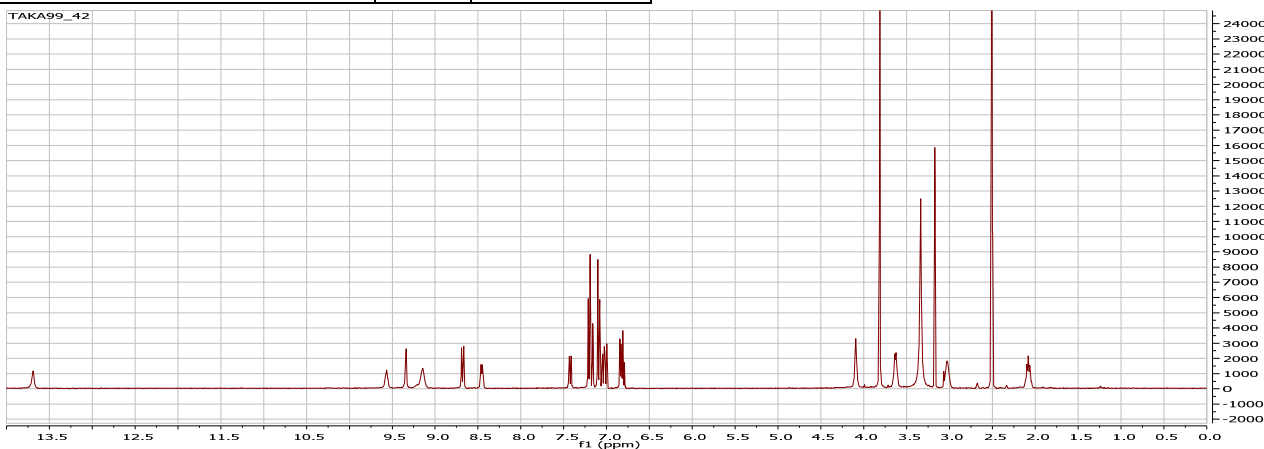

2: UV Detector: TIC

3.336e+2  
Range: 3.336e+2

(2) ELSD Signal

1973.198  
Range: 1973.139

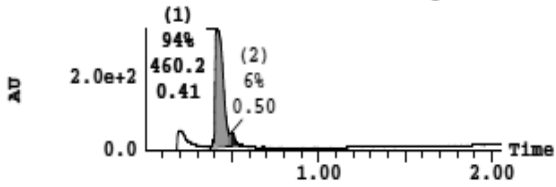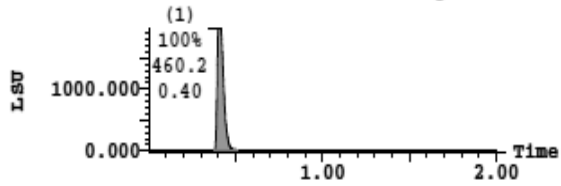

| Peak ID | Compound | Time | Mass Found |
|---------|----------|------|------------|
| 1       | Found    | 0.40 | 460.22     |

1:MS ES+  
8.3e+007

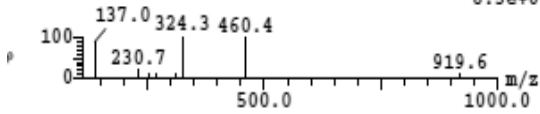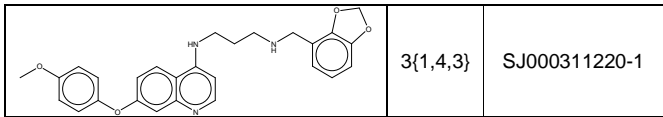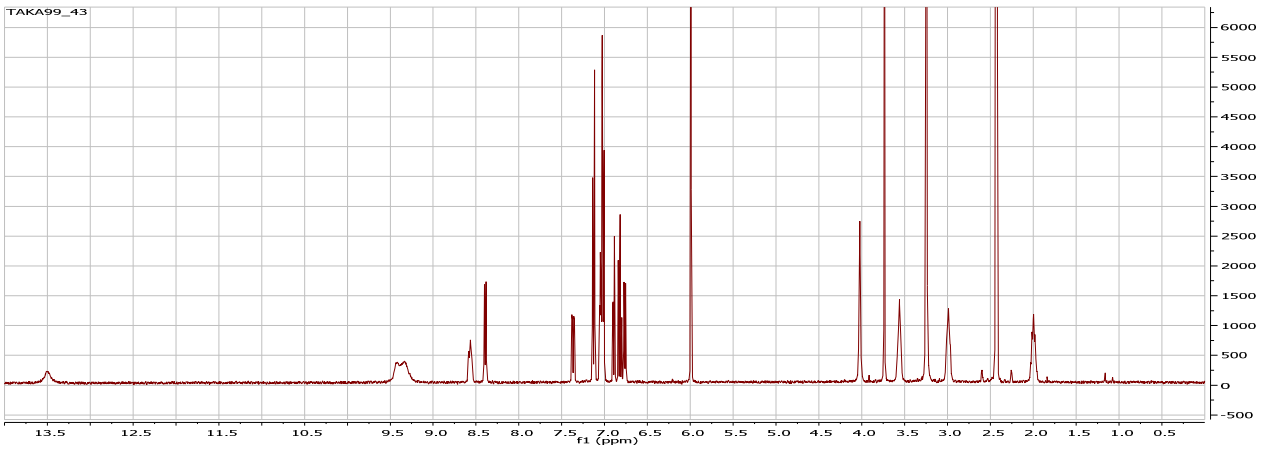

2: UV Detector: TIC

3.254e+2  
Range: 3.254e+2

(2) ELSD Signal

1402.075  
Range: 1401.893

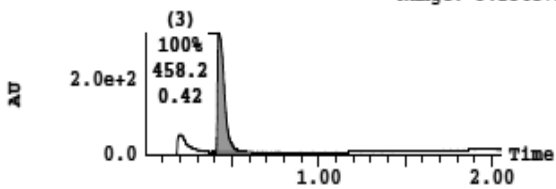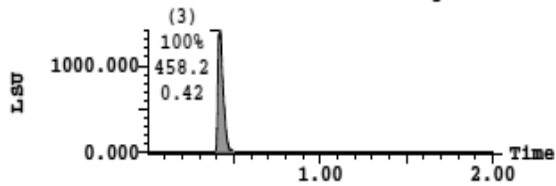

| Peak ID | Compound | Time | Mass Found |
|---------|----------|------|------------|
| 3       | Found    | 0.41 | 458.20     |

1:MS ES+  
8.7e+007

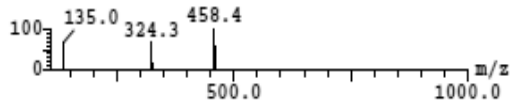

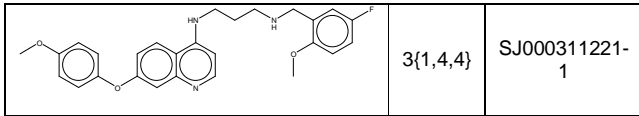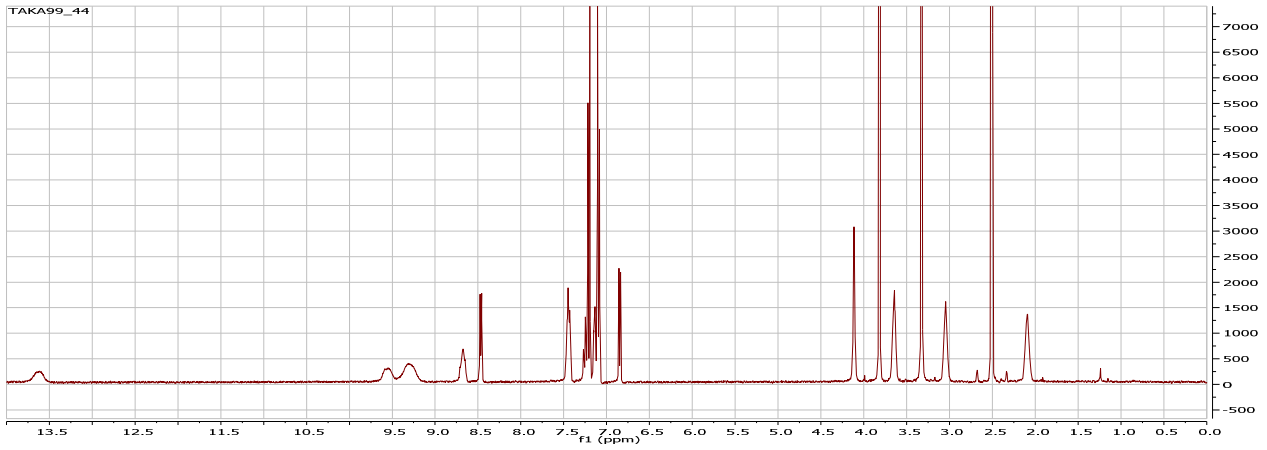

2: UV Detector: TIC

3.201e+2 (2) ELSD signal  
Range: 3.201e+2

1416.251  
Range: 1416.166

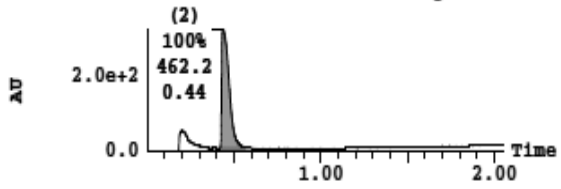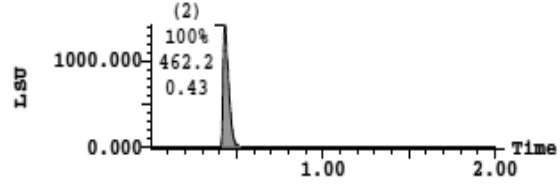

| Peak ID | Compound | Time | Mass Found |
|---------|----------|------|------------|
| 2       | Found    | 0.42 | 462.21     |

1:MS ES+  
8.3e+007

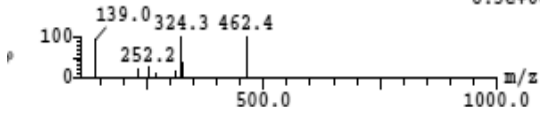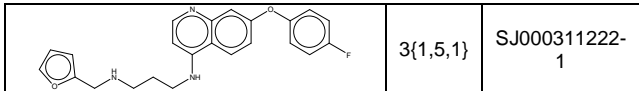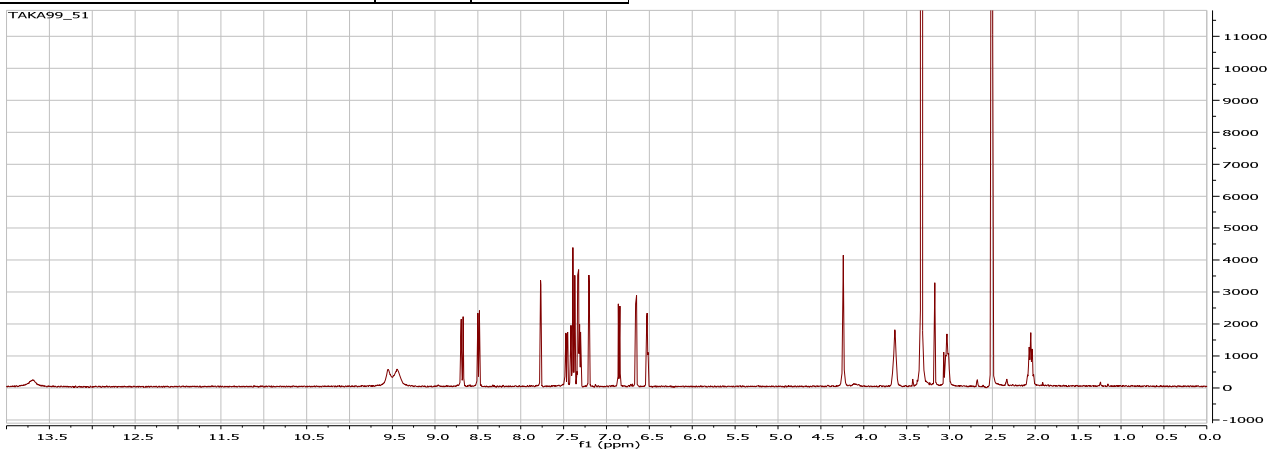



2: UV Detector: TIC

2.919e+2 (2) ELSD Signal

1049.791

Range: 2.919e+2

Range: 1049.717

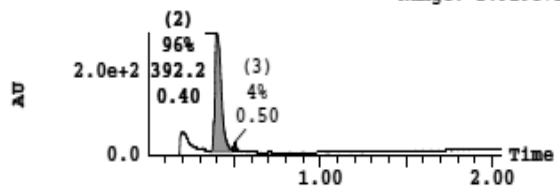

| Peak ID | Compound | Time | Mass Found |
|---------|----------|------|------------|
| 2       | Found    | 0.38 | 392.17     |

1:MS ES+  
8.1e+007

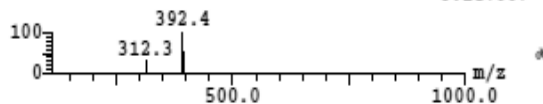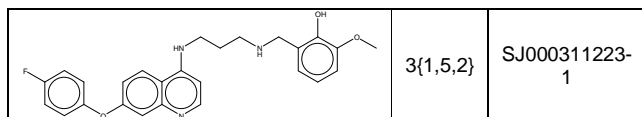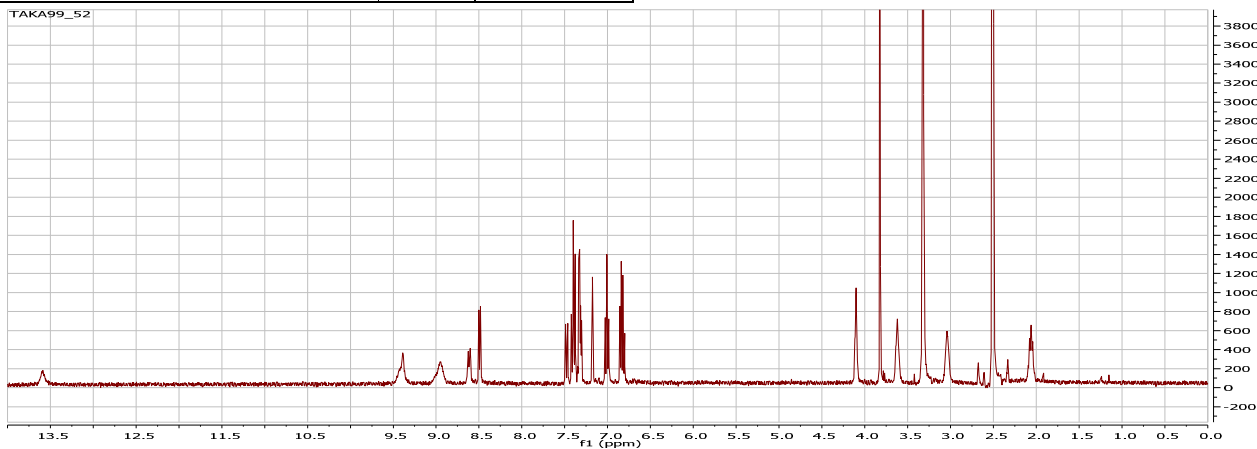

2: UV Detector: TIC

3.089e+2 (2) ELSD Signal

1457.820

Range: 3.089e+2

Range: 1457.776

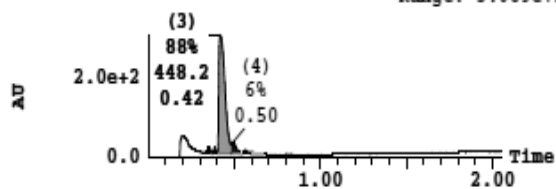

| Peak ID | Compound | Time | Mass Found |
|---------|----------|------|------------|
| 3       | Found    | 0.40 | 448.20     |

1:MS ES+  
8.1e+007

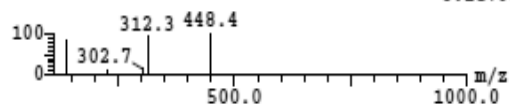

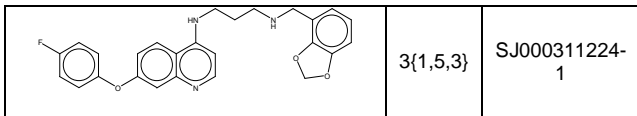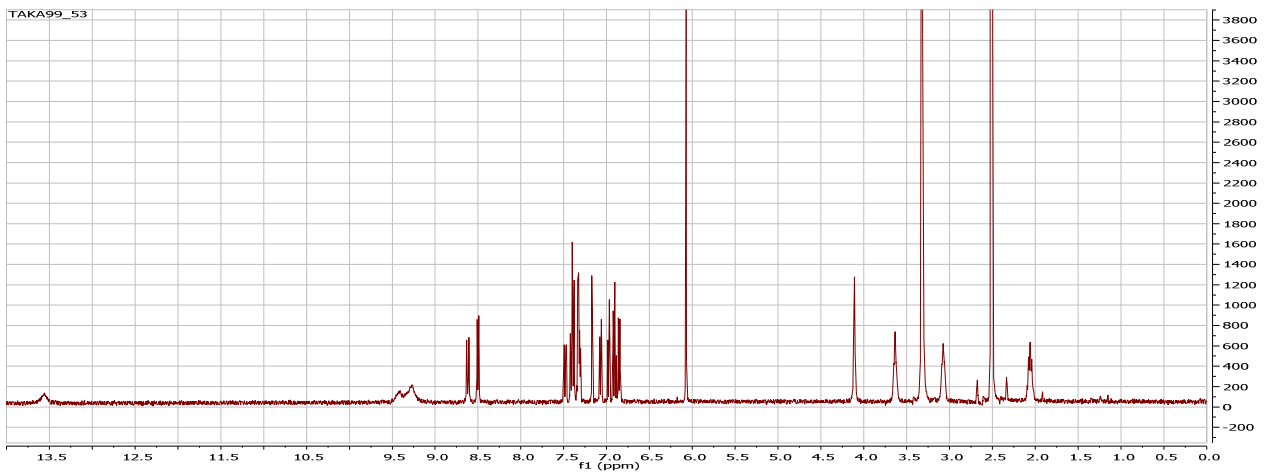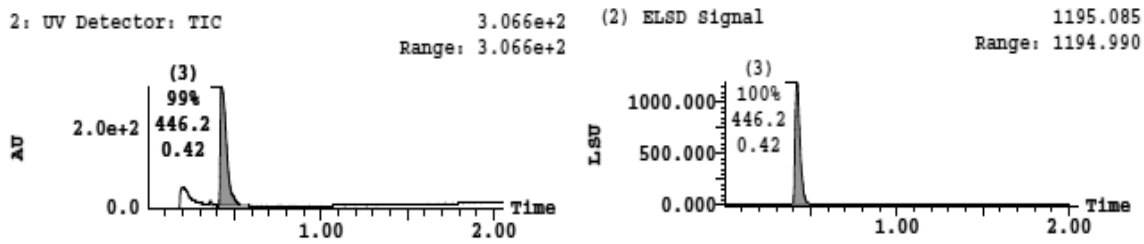

| Peak ID | Compound | Time | Mass Found |
|---------|----------|------|------------|
| 3       | Found    | 0.41 | 446.18     |

1:MS ES+  
9.2e+007

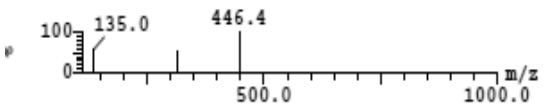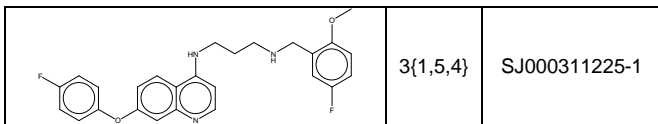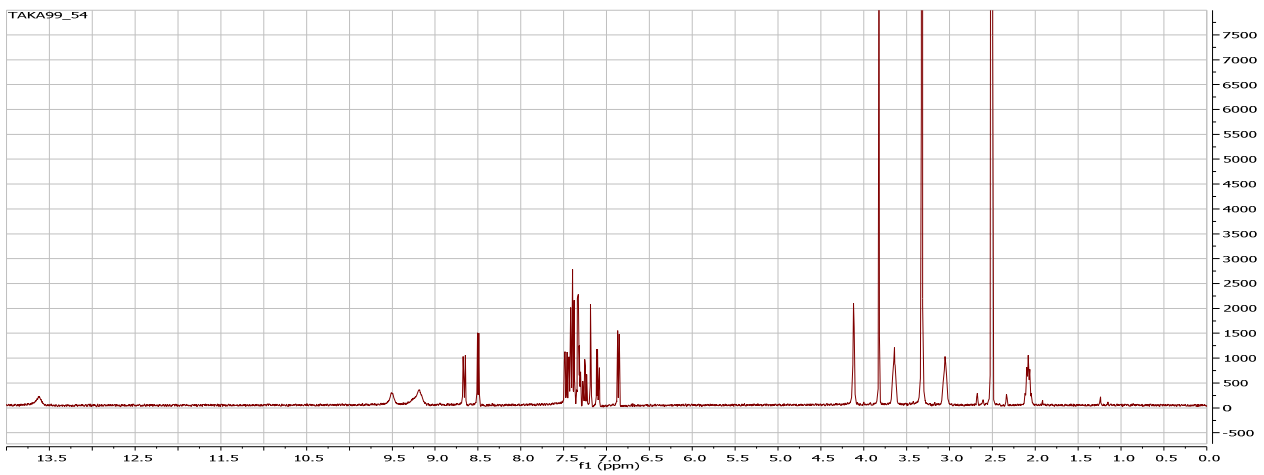

2: UV Detector: TIC

2.903e+2  
Range: 2.903e+2

(2) ELSD signal

1056.806  
Range: 1056.774

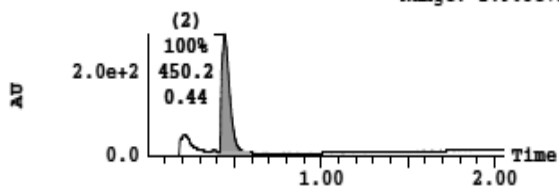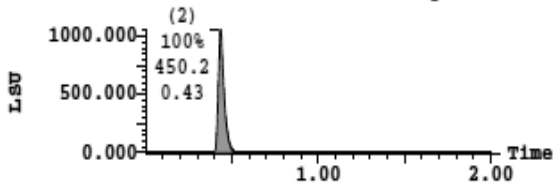

| Peak ID | Compound | Time | Mass Found |
|---------|----------|------|------------|
| 2       | Found    | 0.43 | 450.19     |

1:MS ES+  
9.0e+007

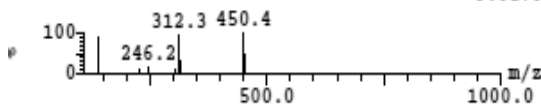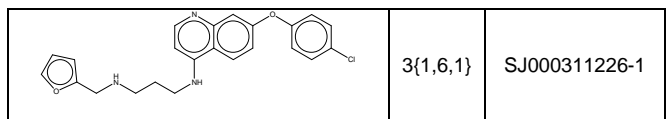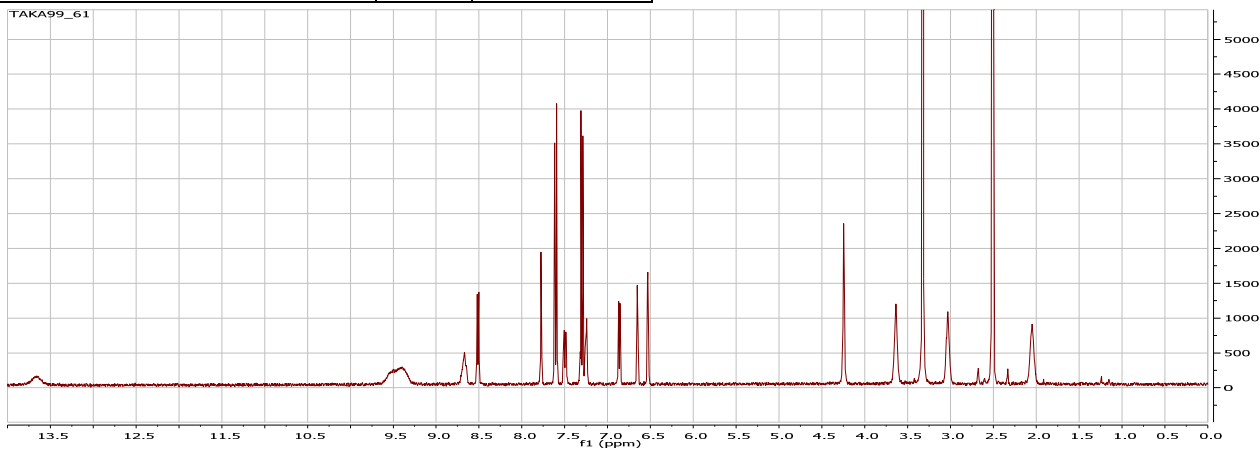

2: UV Detector: TIC

2.933e+2  
Range: 2.933e+2

(2) ELSD signal

1264.564  
Range: 1264.400

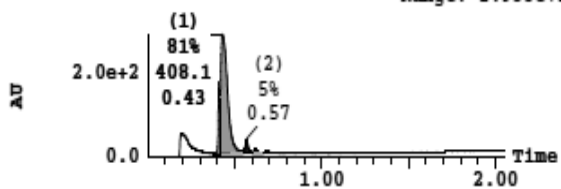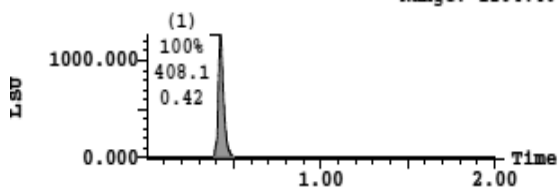

| Peak ID | Compound | Time | Mass Found |
|---------|----------|------|------------|
| 1       | Found    | 0.41 | 408.14     |

1:MS ES+  
7.0e+007

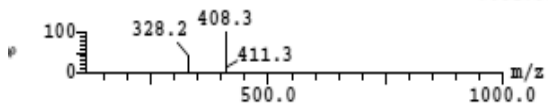

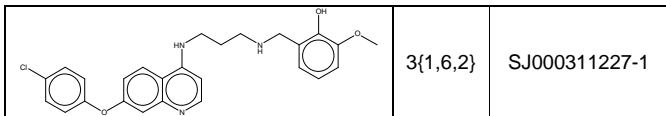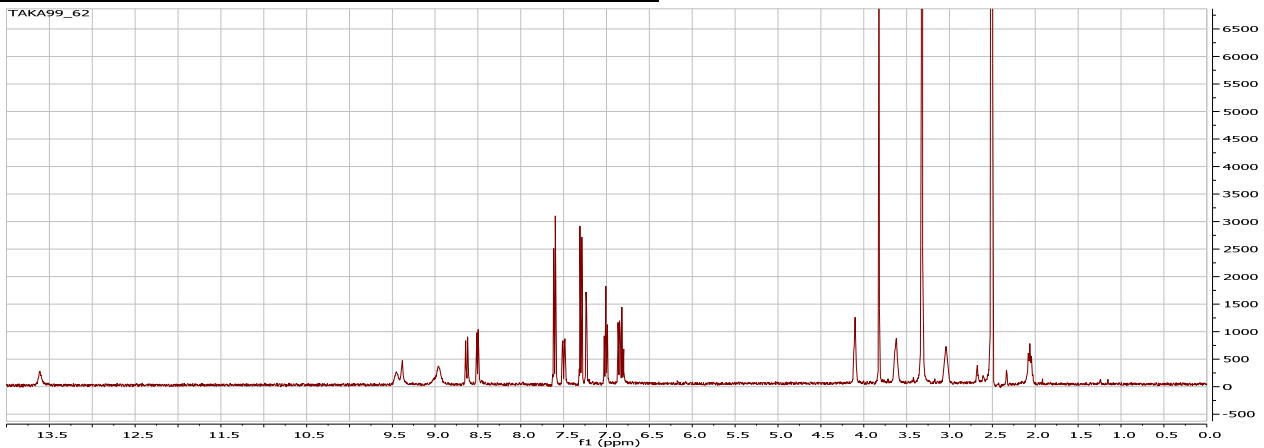

2: UV Detector: TIC

2.953e+2 (2) ELSD signal  
Range: 2.953e+2

1110.261  
Range: 1110.172

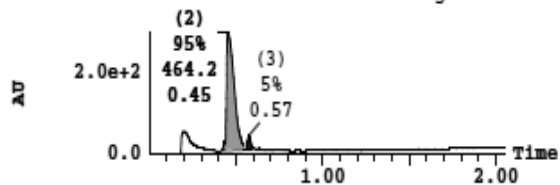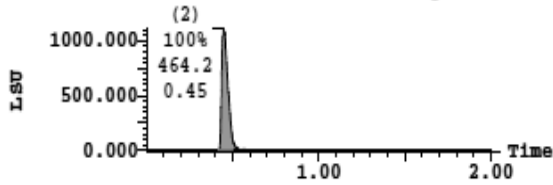

| Peak ID | Compound | Time | Mass Found |
|---------|----------|------|------------|
| 2       | Found    | 0.44 | 464.17     |

1:MS ES+  
7.5e+007

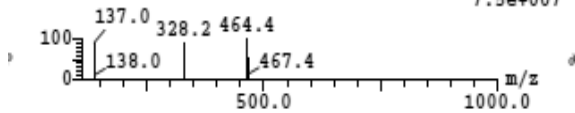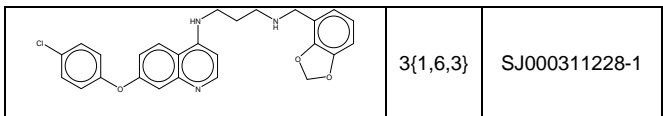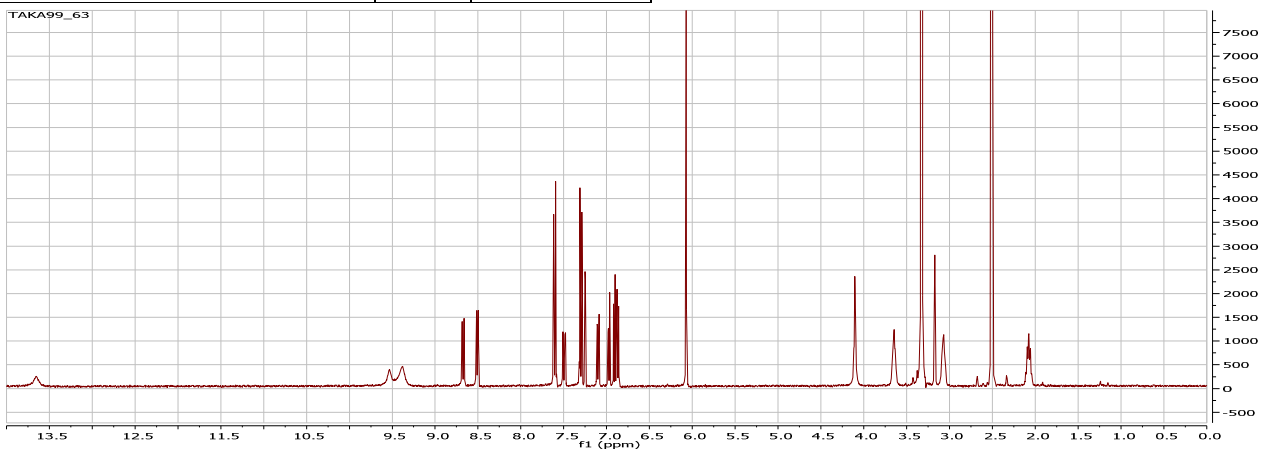

2: UV Detector: TIC

2.996e+2  
Range: 2.996e+2

(2) ELSD Signal

1162.589  
Range: 1162.543

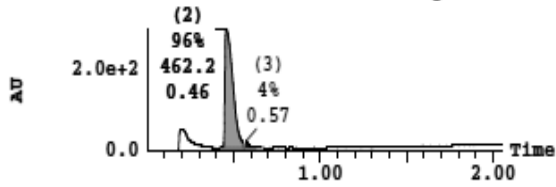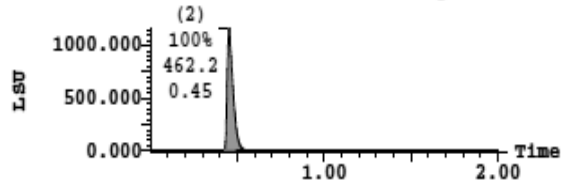

| Peak ID | Compound | Time | Mass Found |
|---------|----------|------|------------|
| 2       | Found    | 0.45 | 462.15     |

1:MS ES+  
8.5e+007

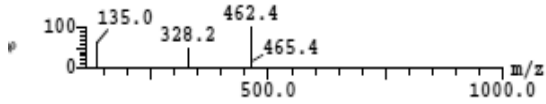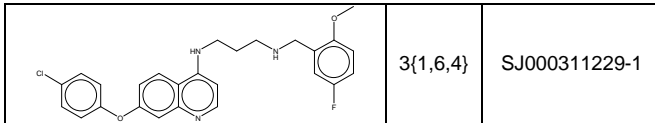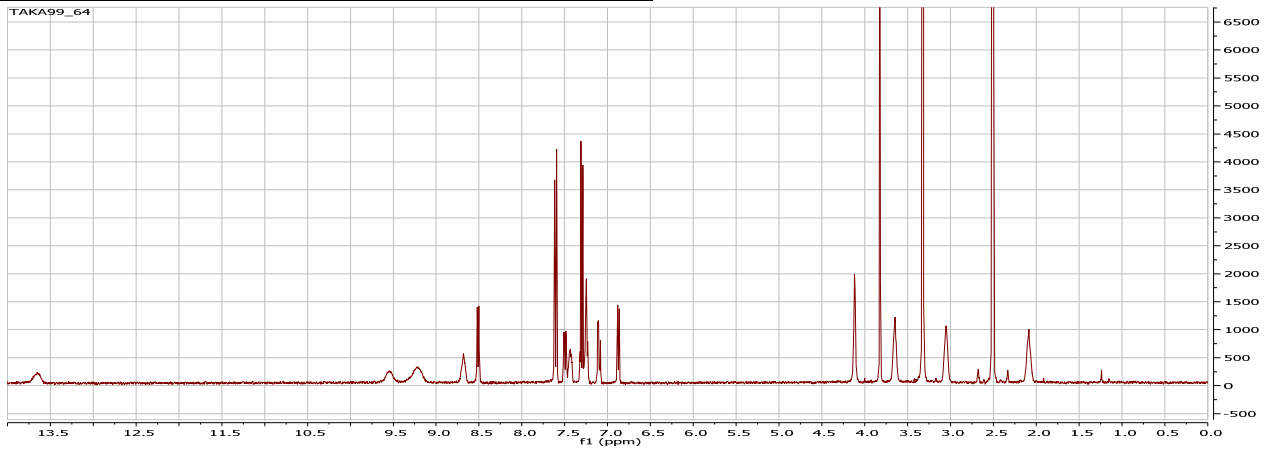

2: UV Detector: TIC

2.908e+2  
Range: 2.908e+2

(2) ELSD signal

975.362  
Range: 975.216

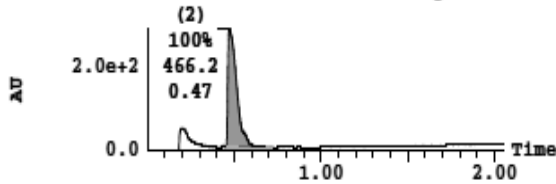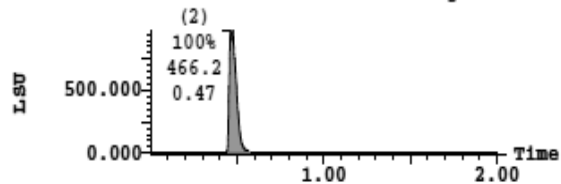

| Peak ID | Compound | Time | Mass Found |
|---------|----------|------|------------|
| 2       | Found    | 0.48 | 466.16     |

1:MS ES+  
8.1e+007

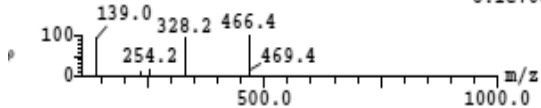

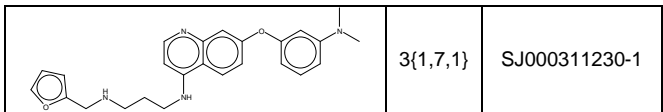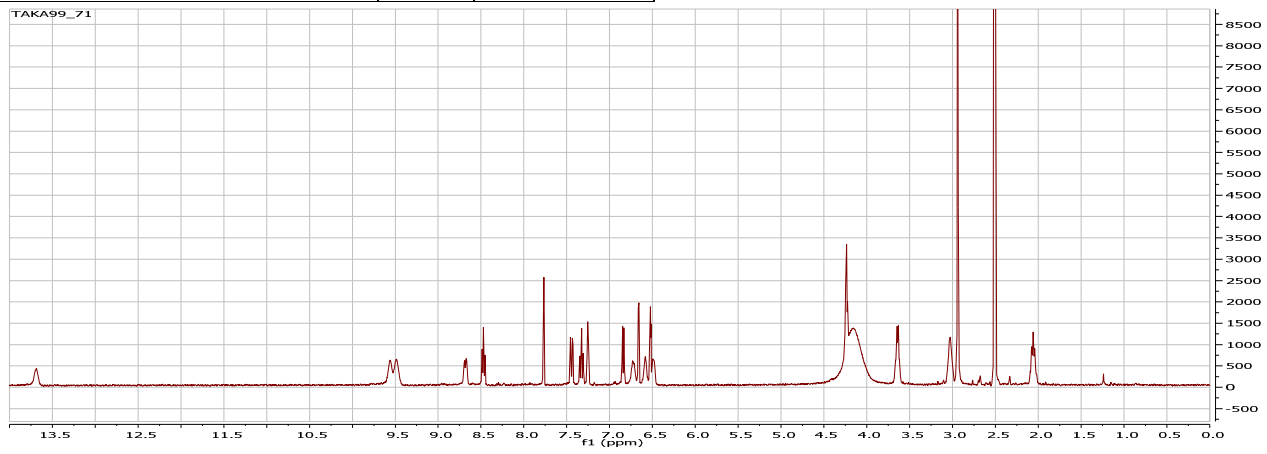

2: UV Detector: TIC

3.11e+2  
Range: 3.11e+2

(2) ELSD signal

1241.109  
Range: 1241.084

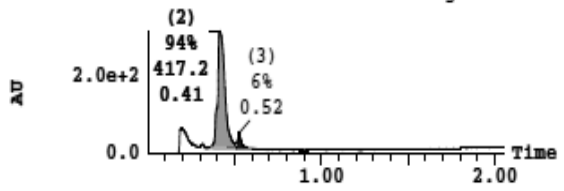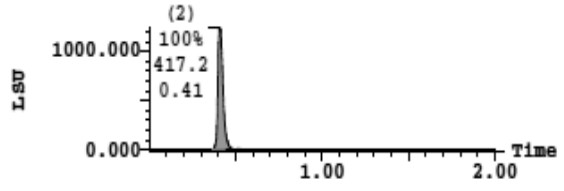

| Peak ID | Compound | Time | Mass Found |
|---------|----------|------|------------|
| 2       | Found    | 0.39 | 417.22     |

1:MS ES+  
7.3e+007

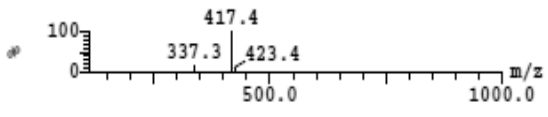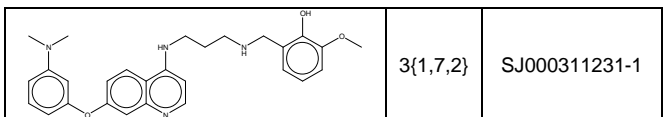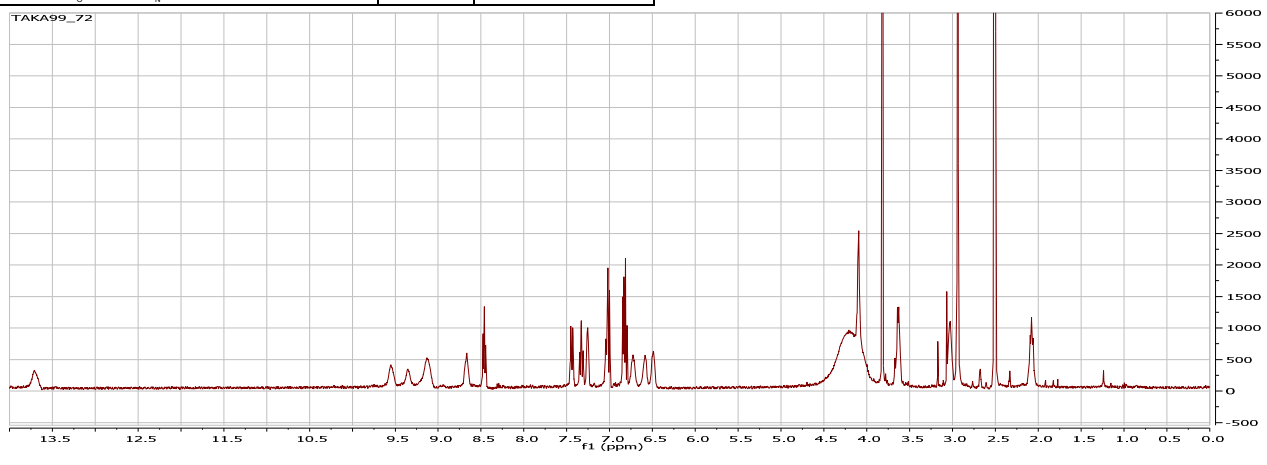

2: UV Detector: TIC

3.132e+2  
Range: 3.132e+2

1: MS ES+ :TIC

9.2e+00

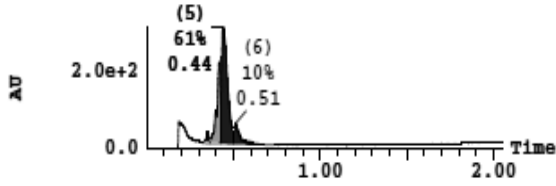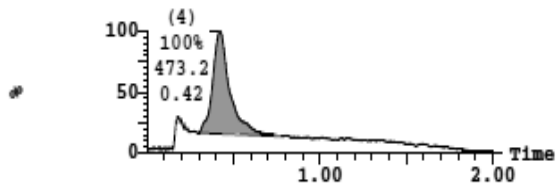

(2) ELSD Signal

1140.537  
Range: 1140.446

| Peak ID | Compound | Time | Mass Found |
|---------|----------|------|------------|
| 4       | Found    | 0.42 | 473.25     |

1:MS ES+  
7.8e+007

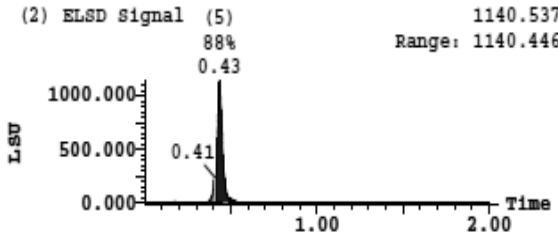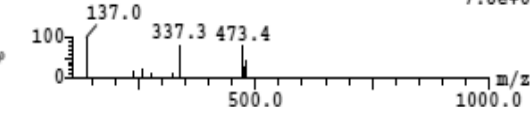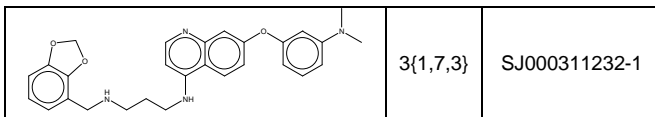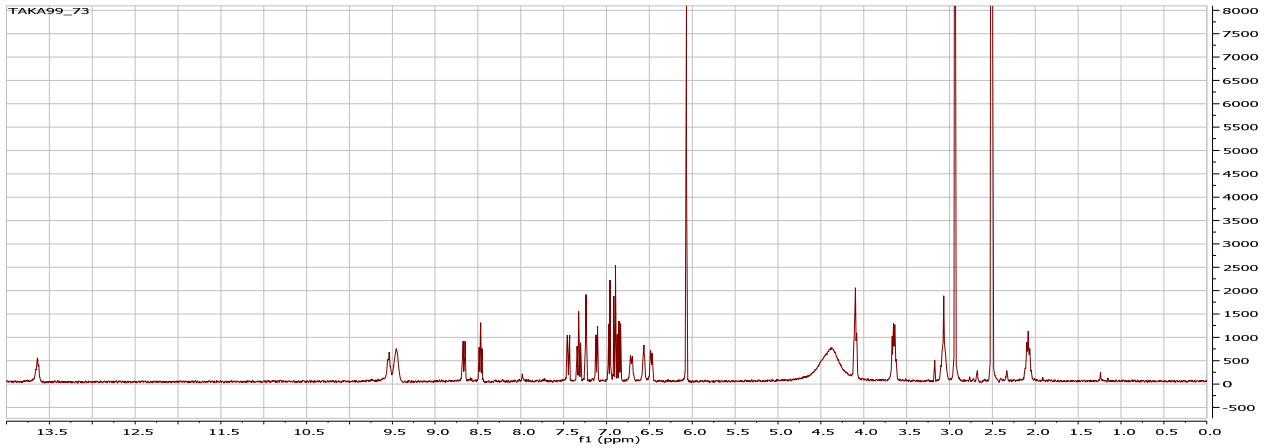

2: UV Detector: TIC

1.408e+2  
Range: 1.408e+2

(2) ELSD signal

105.344  
Range: 105.324

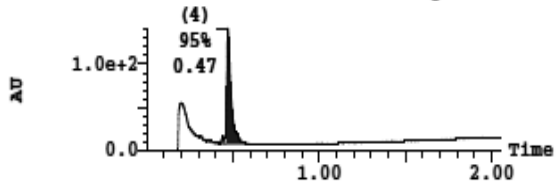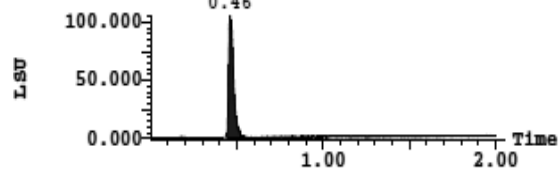

| Peak ID | Compound | Time | Mass Found |
|---------|----------|------|------------|
| 3       | Found    | 0.45 | 471.23     |

1:MS ES+  
4.5e+007

1: MS ES+ :TIC

4.6e+009

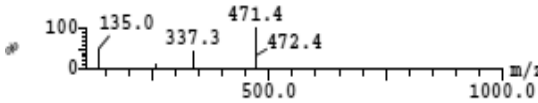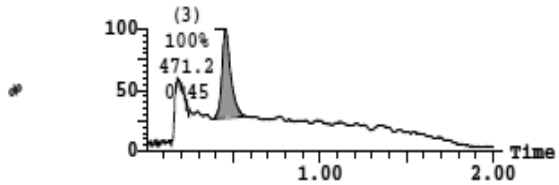

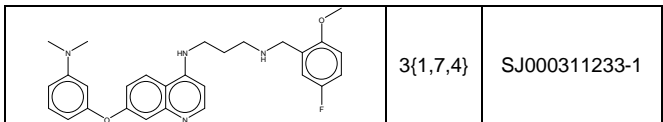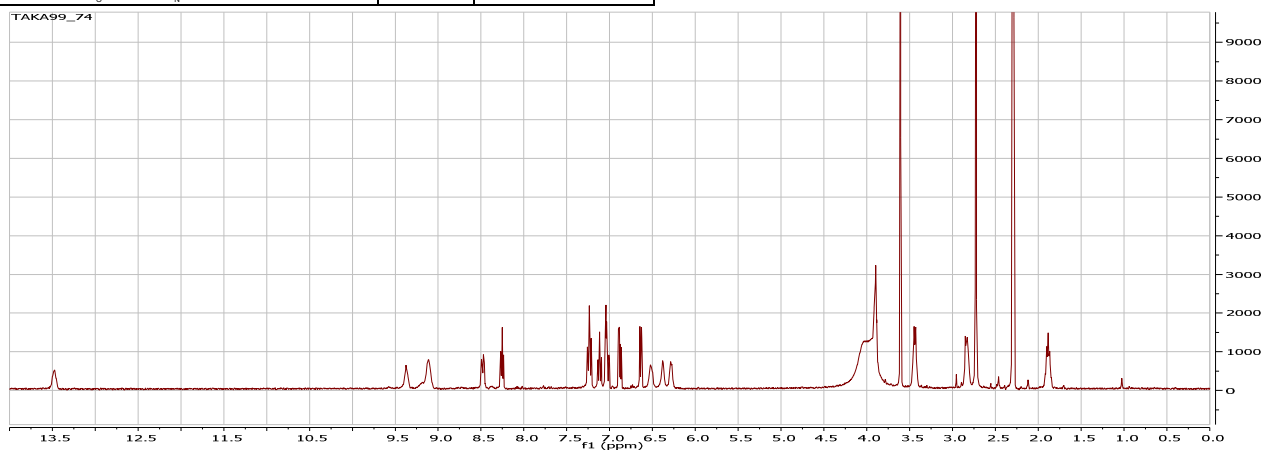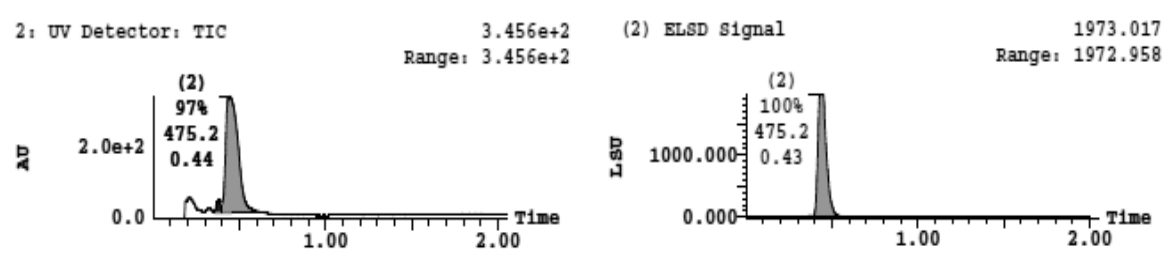

| Peak ID | Compound | Time | Mass Found |
|---------|----------|------|------------|
| 2       | Found    | 0.42 | 475.24     |

1:MS ES+  
8.9e+007

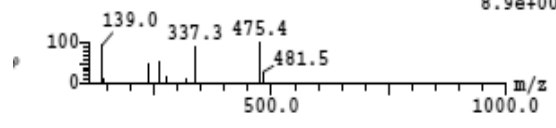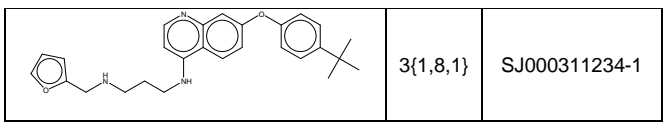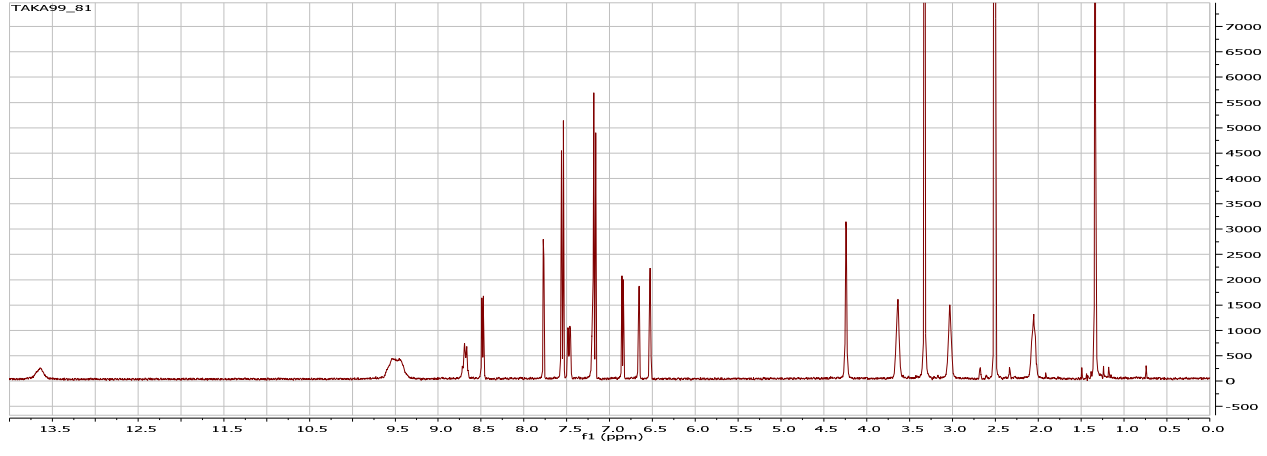



2: UV Detector: TIC 2.157e+2  
Range: 2.157e+2

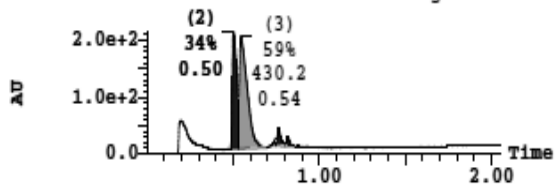

1: MS ES+ :TIC 5.6e+009

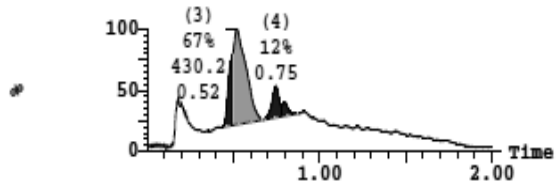

(2) ELSD signal 526.063  
Range: 525.984

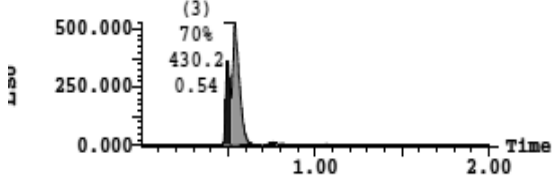

| Peak ID | Compound | Time | Mass Found |
|---------|----------|------|------------|
| 3       | Found    | 0.52 | 430.24     |

1:MS ES+  
6.8e+007

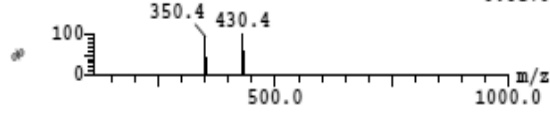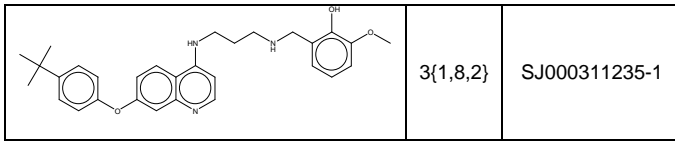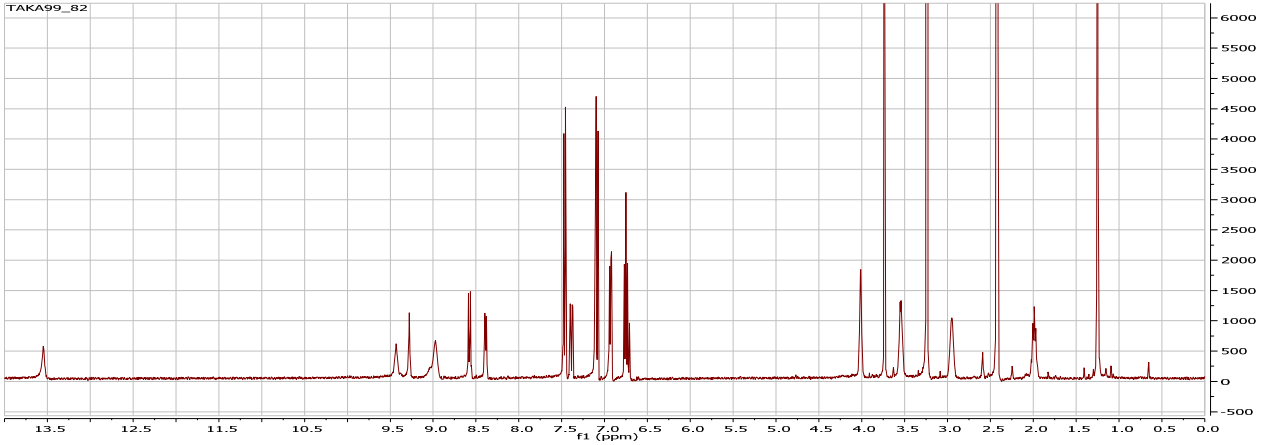

2: UV Detector: TIC 2.827e+2  
Range: 2.827e+2

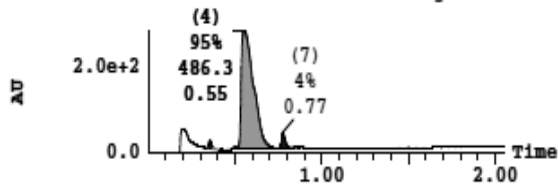

(2) ELSD Signal 1360.029  
Range: 1360.002

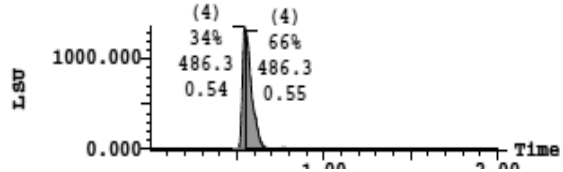

| Peak ID | Compound | Time | Mass Found |
|---------|----------|------|------------|
| 5       | Found    | 0.59 | 486.27     |

1:MS ES+  
4.1e+007

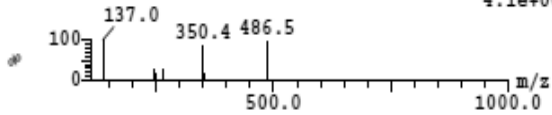

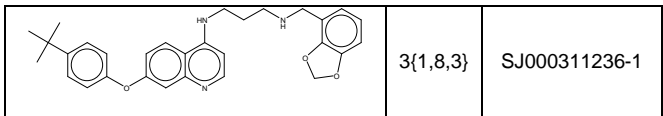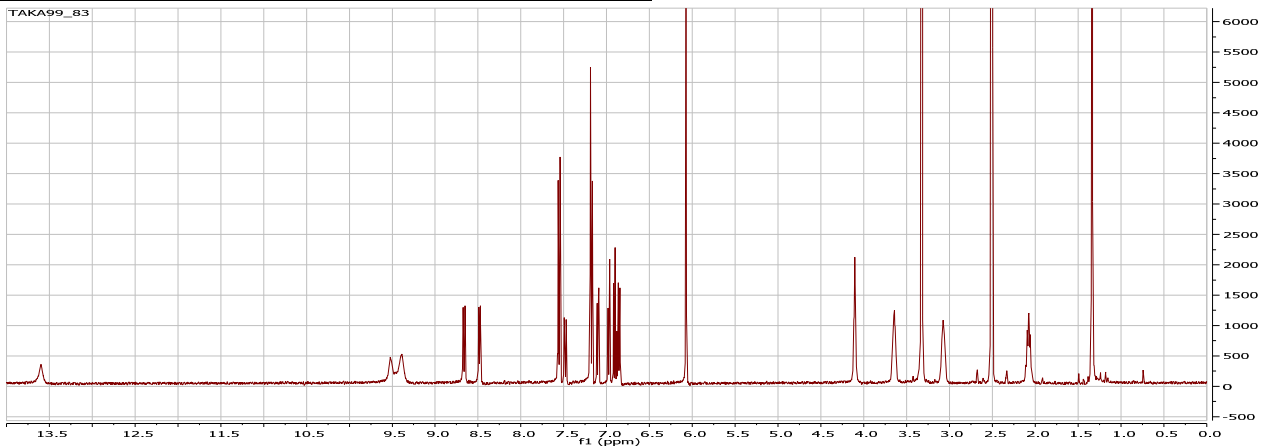

2: UV Detector: TIC

2.547e+2  
Range: 2.547e+2

(2) ELSD Signal

834.972  
Range: 834.947

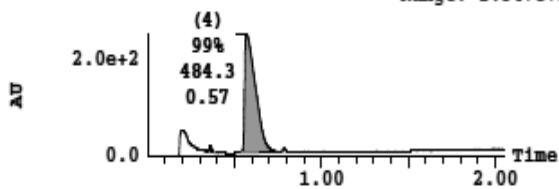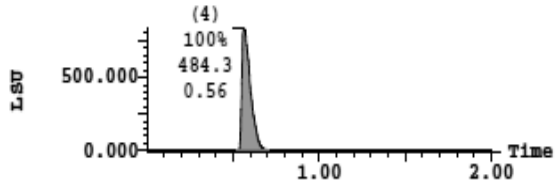

| Peak ID | Compound | Time | Mass Found |
|---------|----------|------|------------|
| 4       | Found    | 0.56 | 484.25     |

1:MS ES+  
1.1e+008

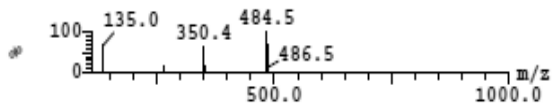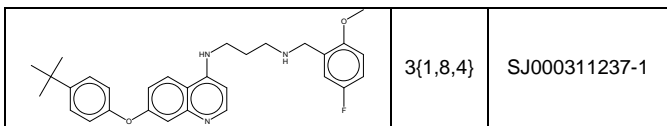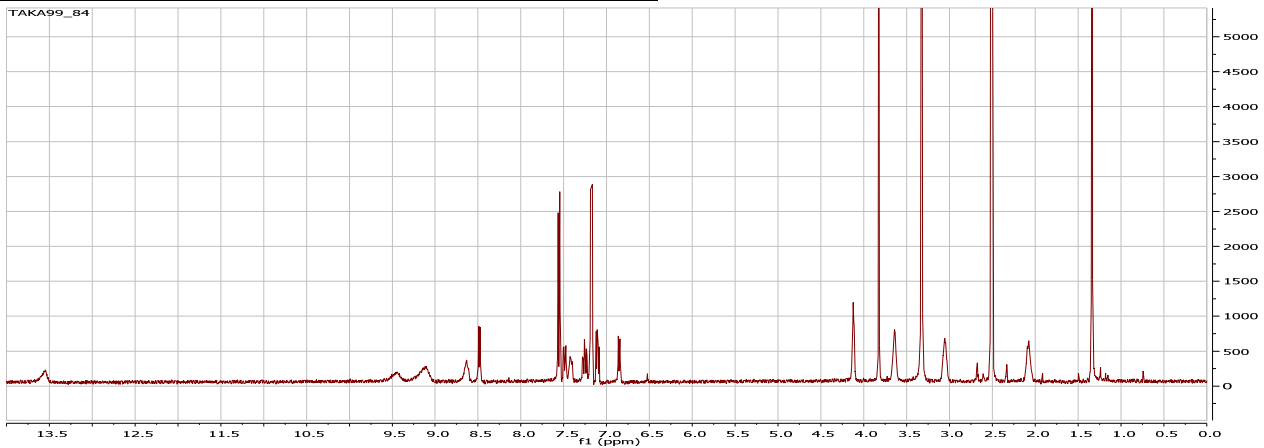

2: UV Detector: TIC 2.315e+2  
 Range: 2.315e+2

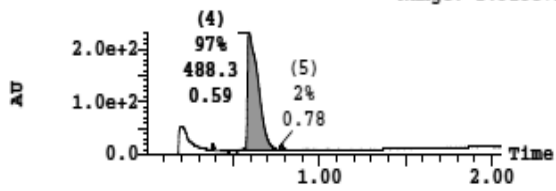

(2) ELSD Signal 651.556  
 Range: 651.530

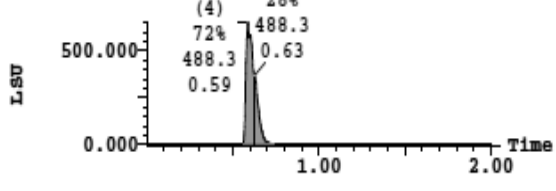

| Peak ID | Compound | Time | Mass Found |
|---------|----------|------|------------|
| 4       | Found    | 0.58 | 488.28     |

1:MS ES+  
 9.4e+007

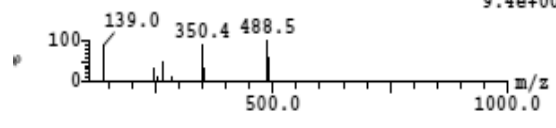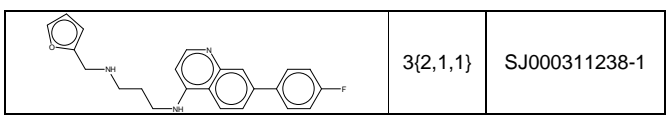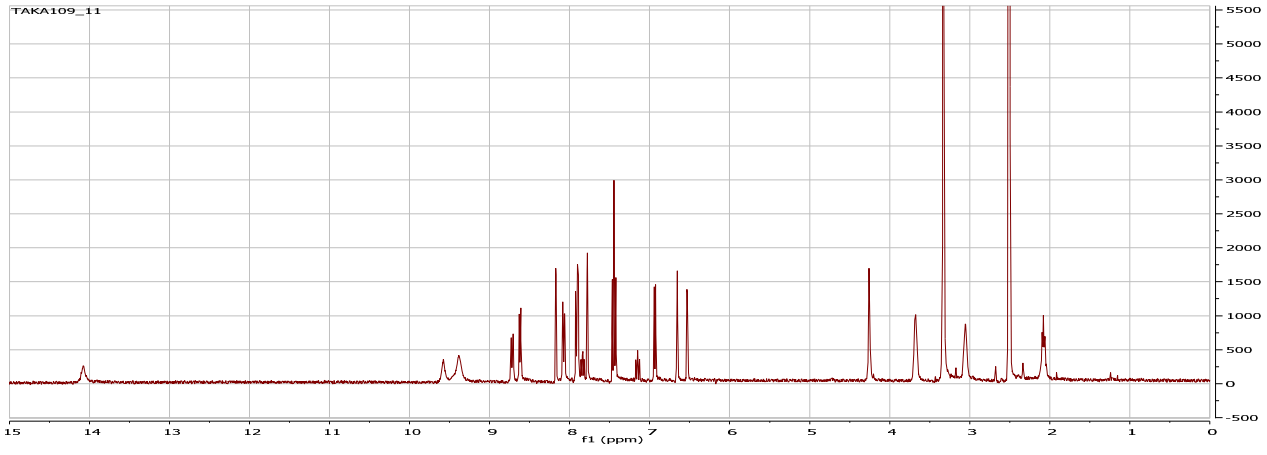

2: UV Detector: TIC 3.471e+2  
 Range: 3.471e+2

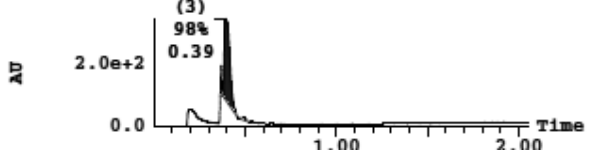

(2) ELSD Signal 1016.209  
 Range: 1016.169

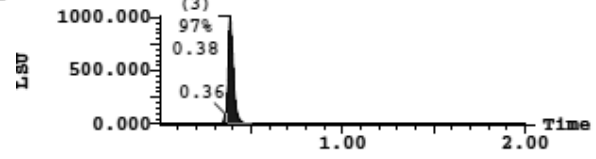

| Peak ID | Compound | Time | Mass Found |
|---------|----------|------|------------|
| 2       | Found    | 0.37 | 376.17     |

1:MS ES+  
 7.8e+007

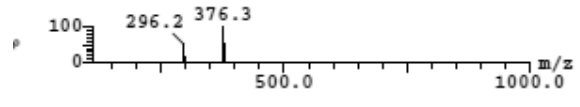

1: MS ES+ :TIC 4.8e+009 1:

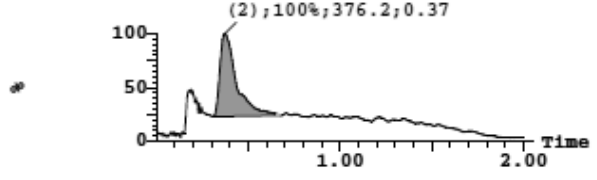

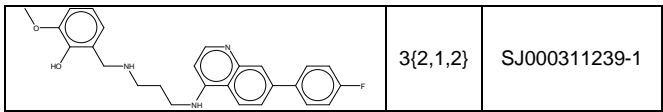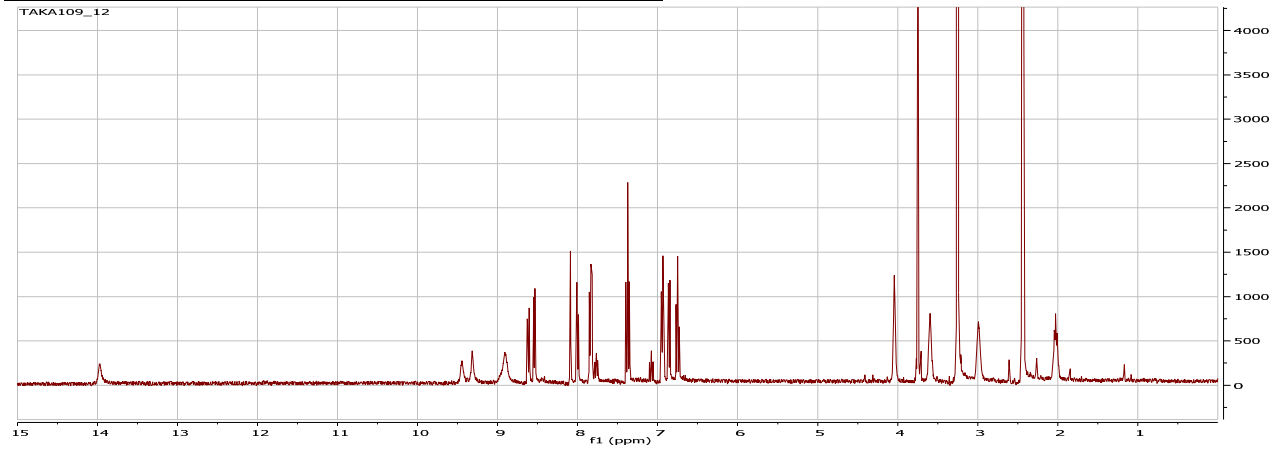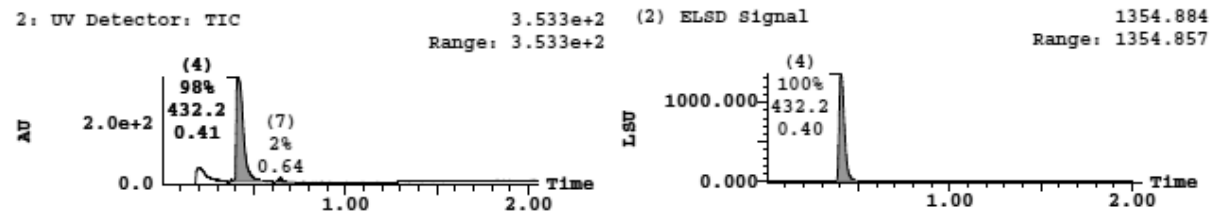

| Peak ID | Compound | Time | Mass Found |
|---------|----------|------|------------|
| 4       | Found    | 0.40 | 432.20     |

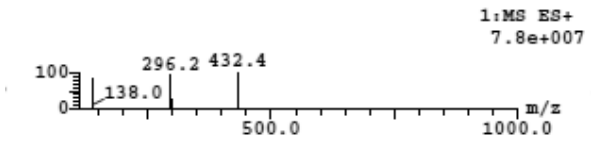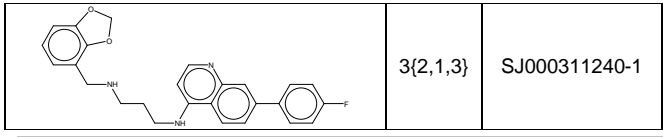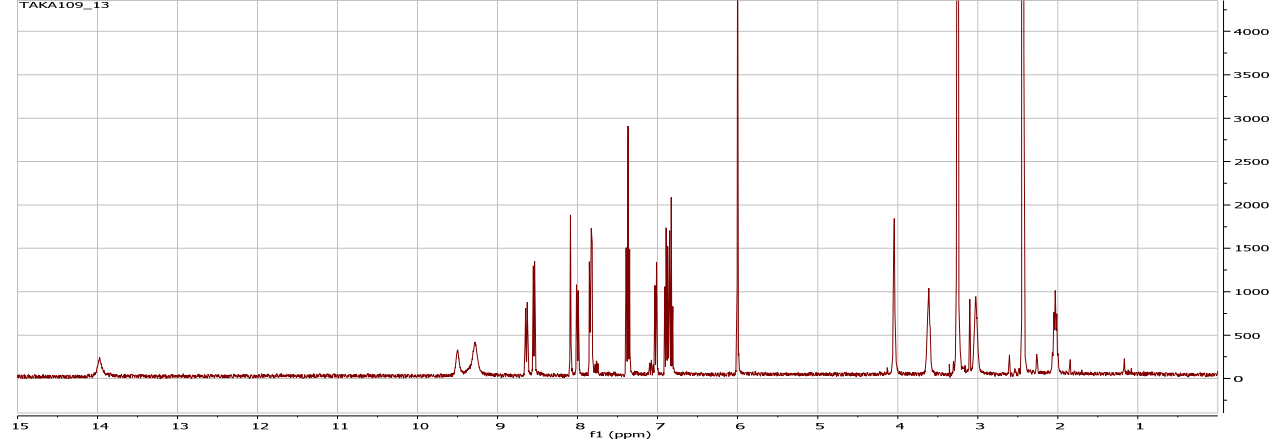

2: UV Detector: TIC

3.514e+2  
Range: 3.514e+2

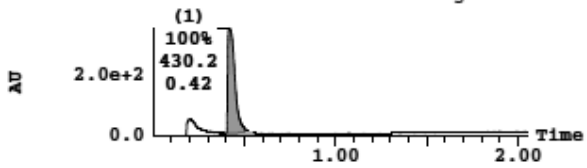

(2) ELSD Signal

1342.332  
Range: 1342.292

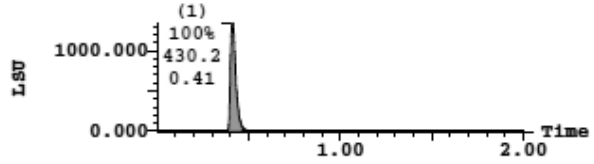

| Peak ID | Compound | Time | Mass Found |
|---------|----------|------|------------|
| 1       | Found    | 0.40 | 430.19     |

1:MS ES+  
8.6e+007

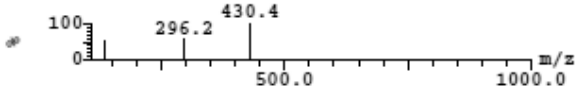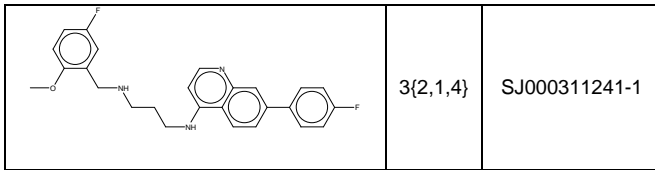

TAKA109\_14

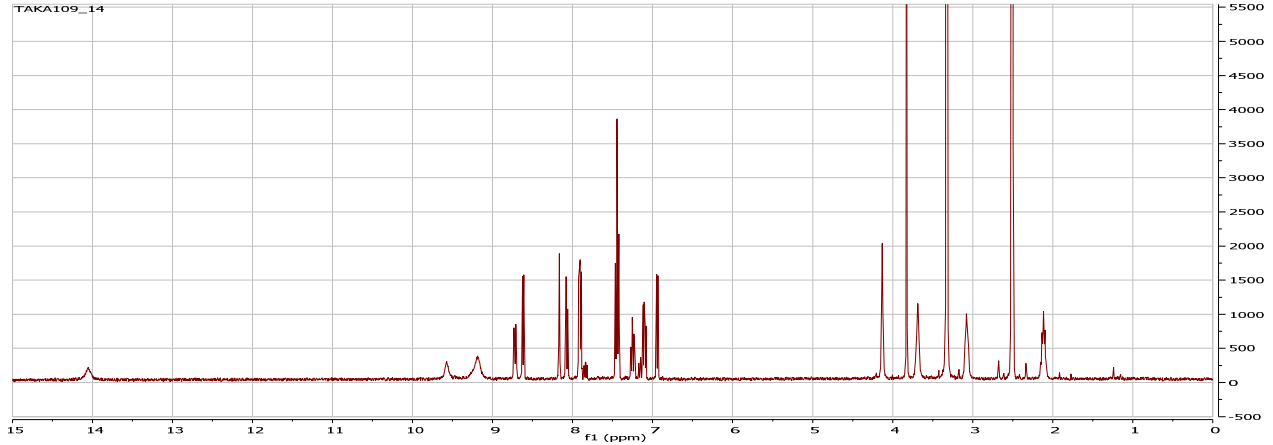

2: UV Detector: TIC

3.368e+2  
Range: 3.368e+2

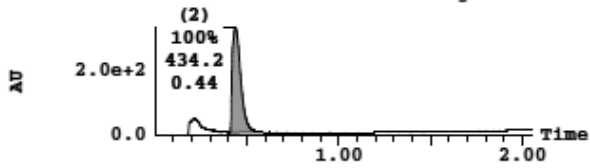

(2) ELSD Signal

1039.268  
Range: 1039.247

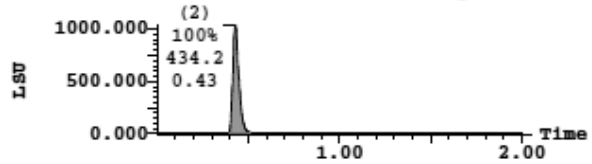

| Peak ID | Compound | Time | Mass Found |
|---------|----------|------|------------|
| 2       | Found    | 0.42 | 434.20     |

1:MS ES+  
9.3e+007

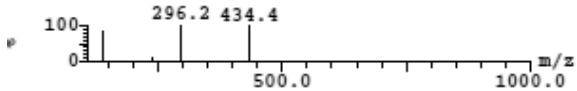

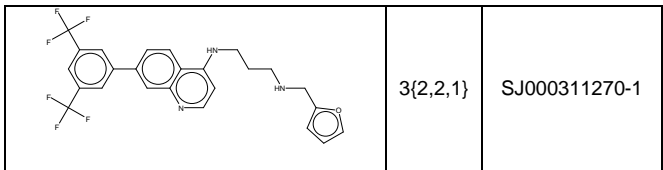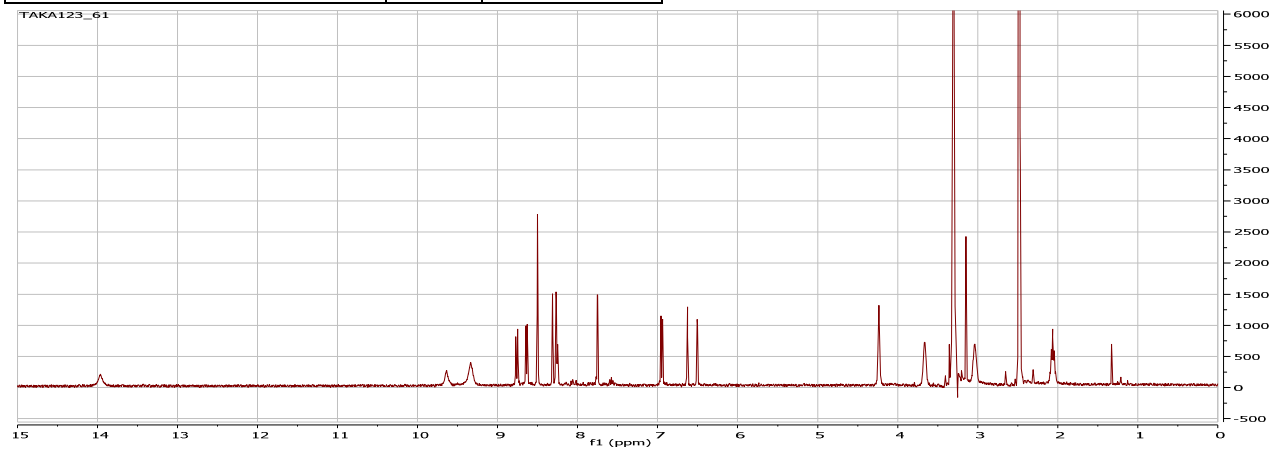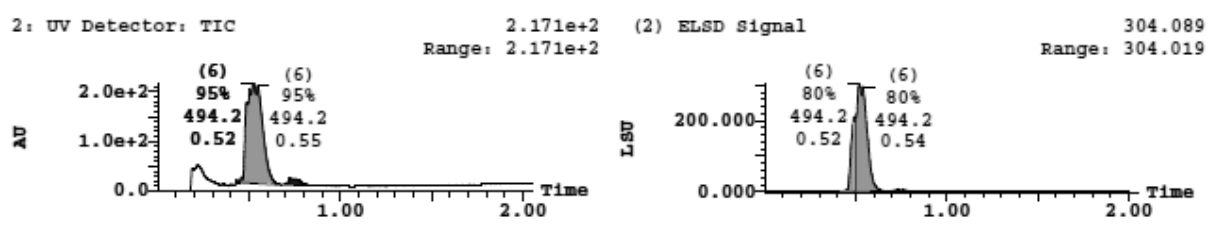

| Peak ID | Compound | Time | Mass Found |
|---------|----------|------|------------|
| 6       | Found    | 0.50 | 494.16     |

1:MS ES+  
8.0e+007

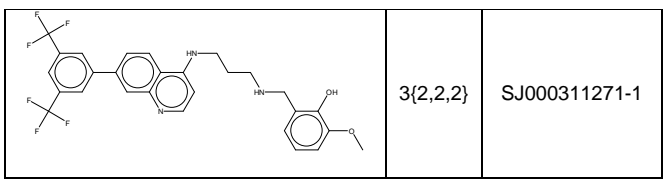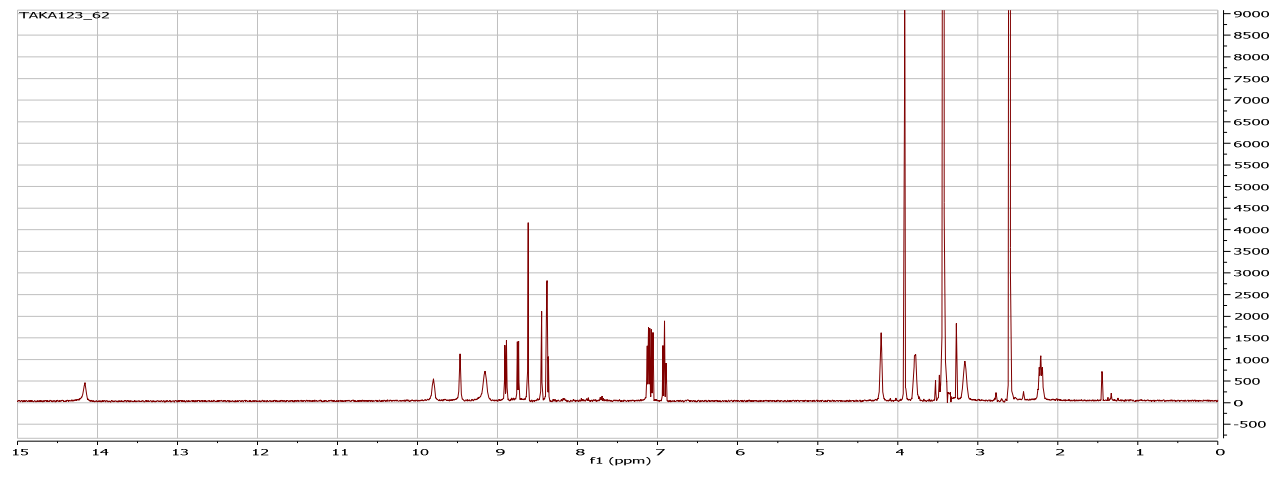

2: UV Detector: TIC

2.933e+2  
Range: 2.933e+2

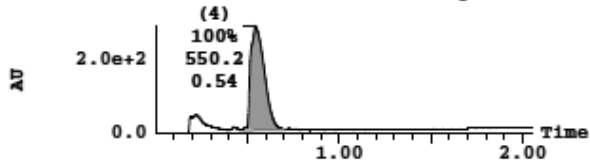

(2) ELSD Signal

785.831  
Range: 785.634

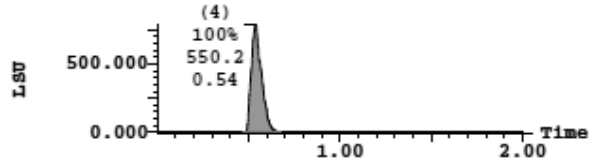

| Peak ID | Compound | Time | Mass Found |
|---------|----------|------|------------|
| 4       | Found    | 0.53 | 550.19     |

1:MS ES+  
1.2e+008

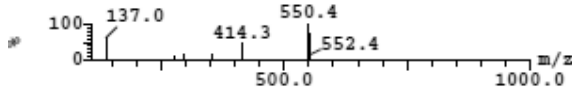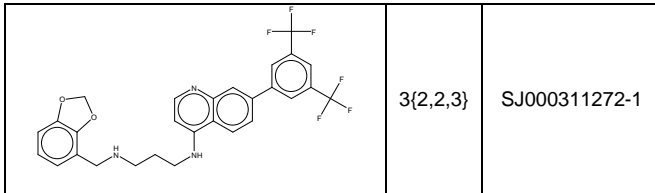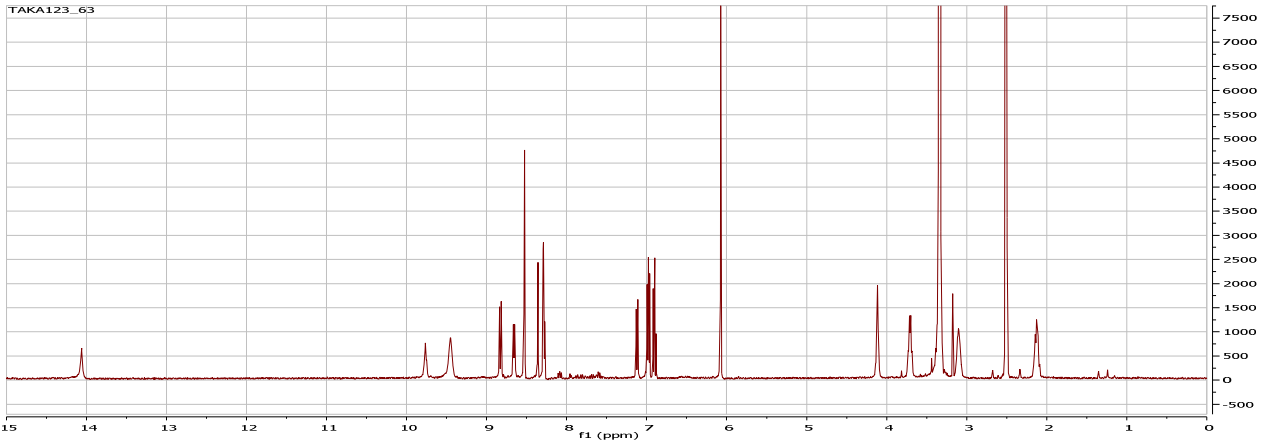

2: UV Detector: TIC

2.858e+2  
Range: 2.858e+2

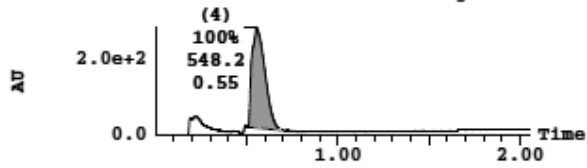

(2) ELSD Signal

681.303  
Range: 681.248

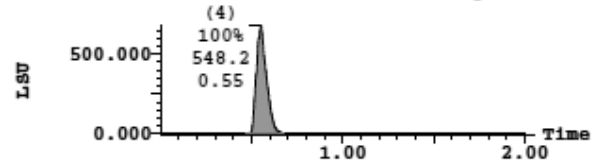

| Peak ID | Compound | Time | Mass Found |
|---------|----------|------|------------|
| 4       | Found    | 0.54 | 548.17     |

1:MS ES+  
1.3e+008

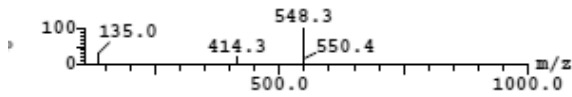

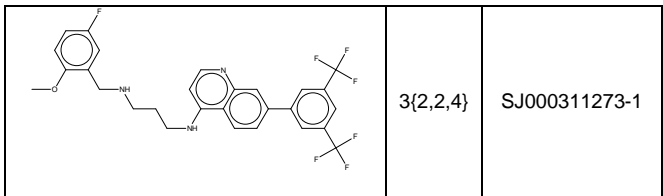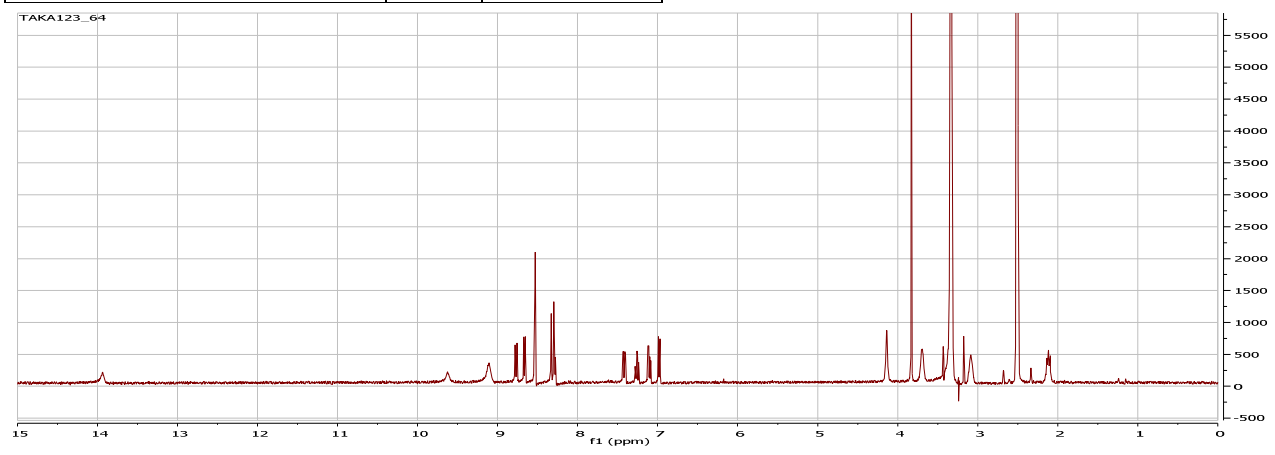

2: UV Detector: TIC 2.932e+2 (2) ELSD Signal 747.933  
 Range: 2.932e+2 Range: 747.850

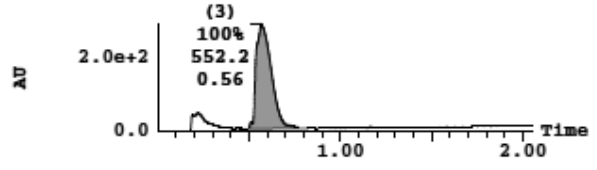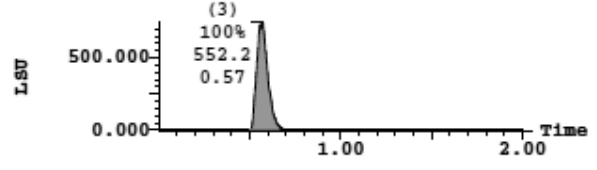

| Peak ID | Compound | Time | Mass Found |
|---------|----------|------|------------|
| 3       | Found    | 0.56 | 552.18     |

1: MS ES+  
1.2e+008

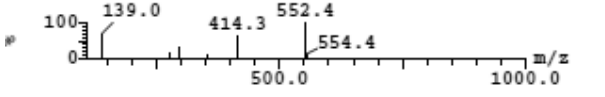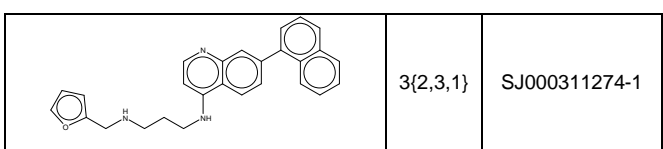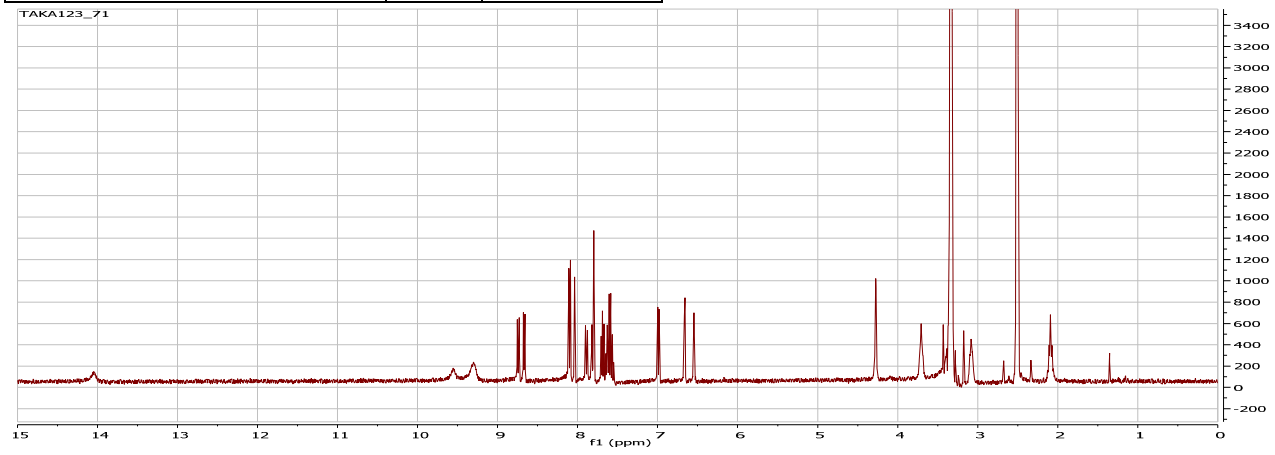



2: UV Detector: TIC

3.092e+2  
Range: 3.092e+2

(2) ELSD signal (3)

852.270  
Range: 852.211

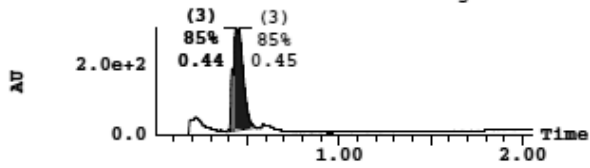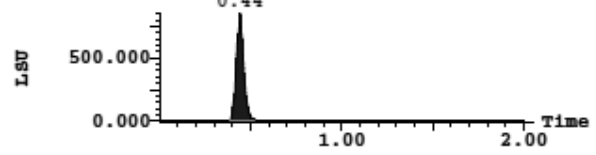

| Peak ID | Compound | Time | Mass Found |
|---------|----------|------|------------|
| 2       | Found    | 0.42 | 408.20     |

1:MS ES+  
7.9e+007

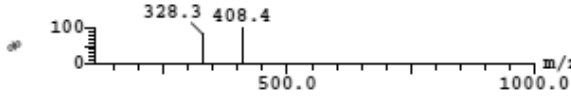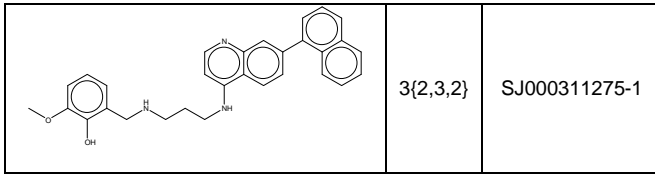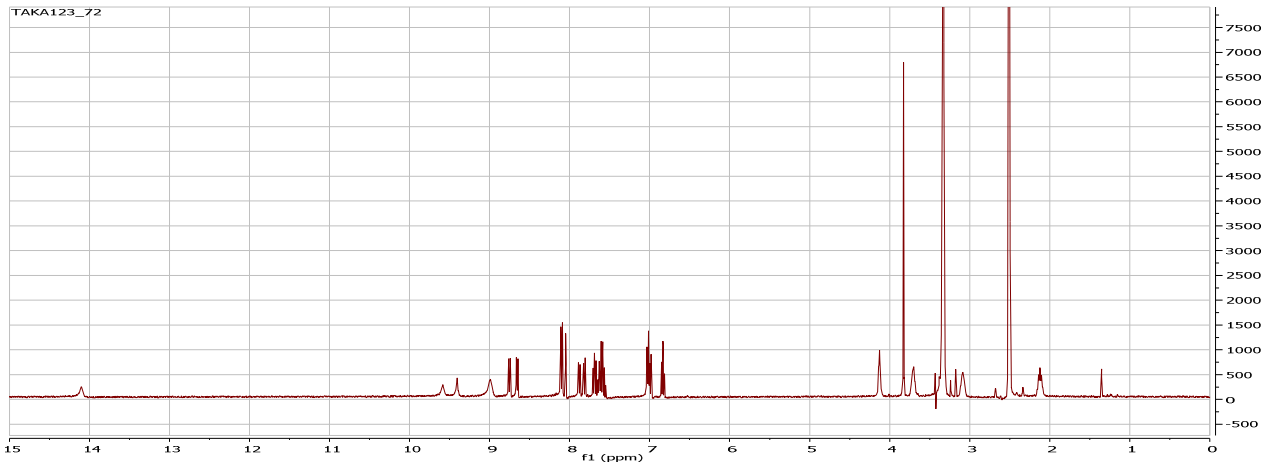

2: UV Detector: TIC

3.291e+2  
Range: 3.291e+2

(2) ELSD signal

1108.180  
Range: 1108.003

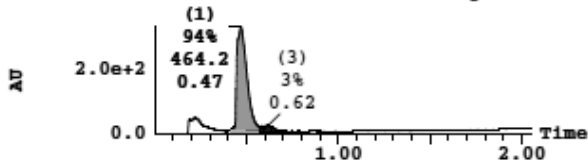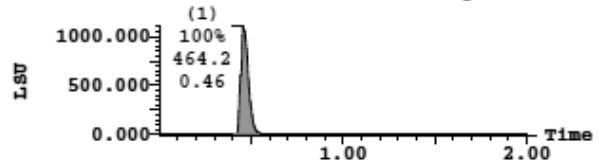

| Peak ID | Compound | Time | Mass Found |
|---------|----------|------|------------|
| 1       | Found    | 0.45 | 464.23     |

1:MS ES+  
9.1e+007

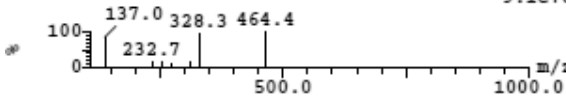

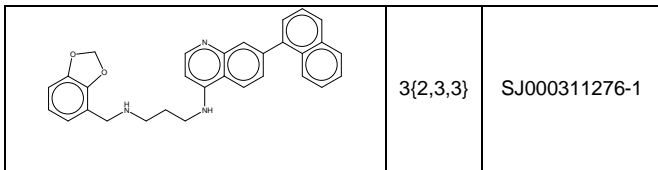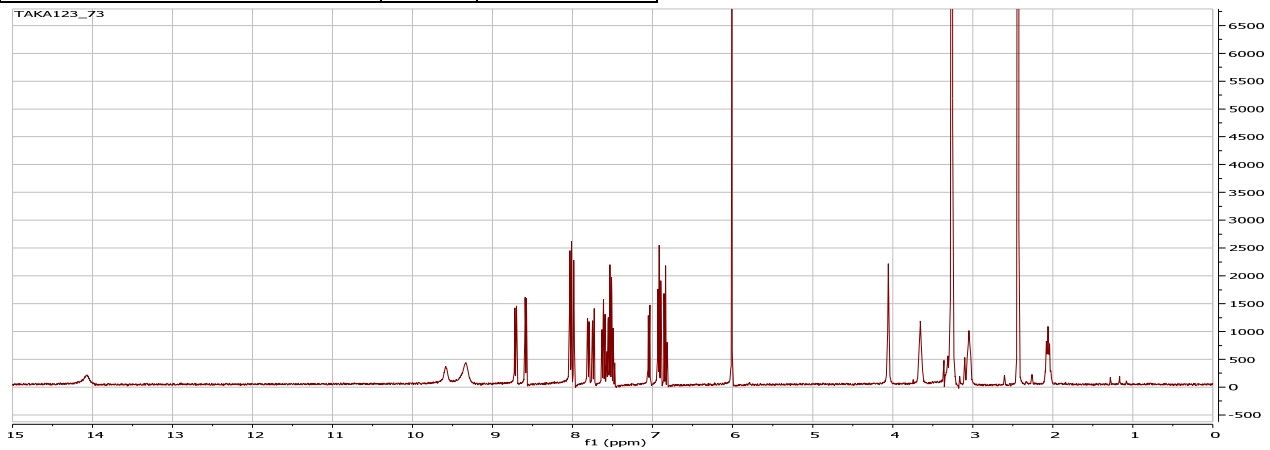

2: UV Detector: TIC

3.531e+2  
Range: 3.531e+2

(2) ELSD Signal

1429.924  
Range: 1429.896

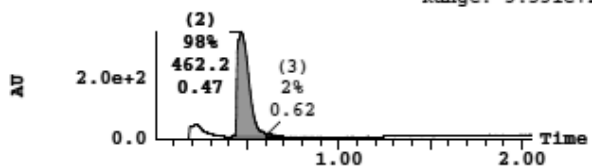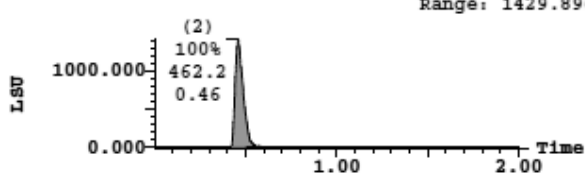

| Peak ID | Compound | Time | Mass Found |
|---------|----------|------|------------|
| 2       | Found    | 0.45 | 462.21     |

1:MS ES+  
1.1e+008

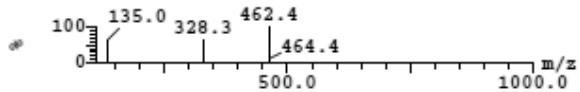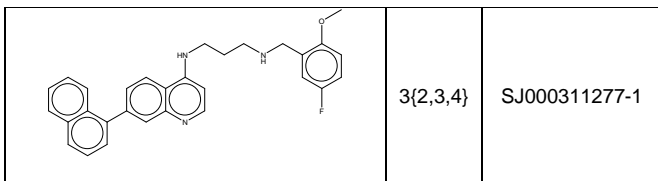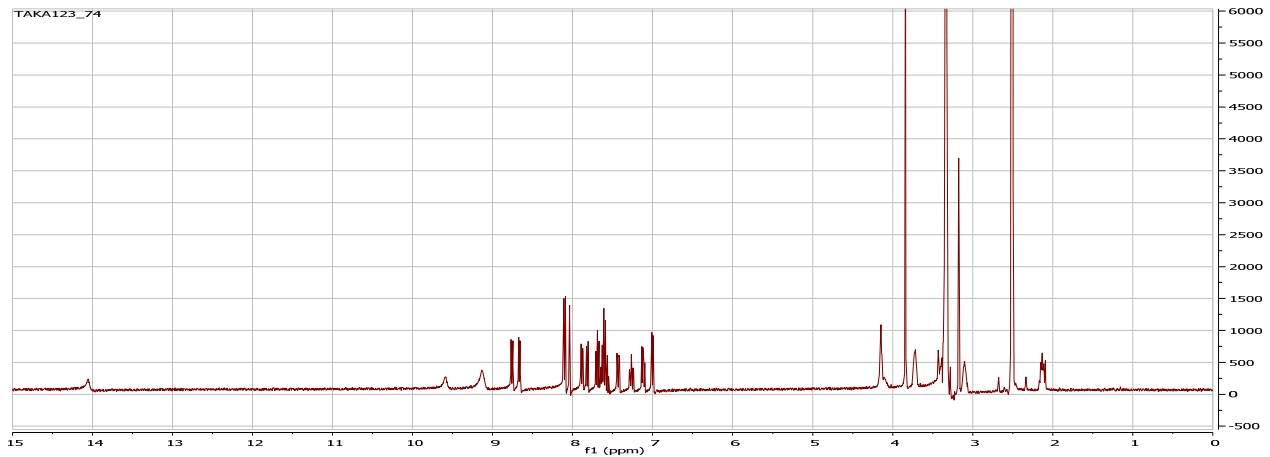

2: UV Detector: TIC

3.28e+2  
Range: 3.28e+2

(2) ELSD Signal

989.378  
Range: 989.348

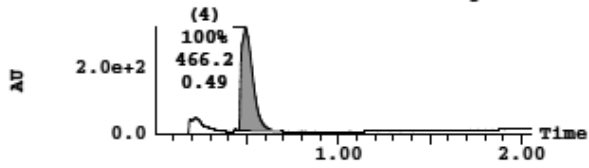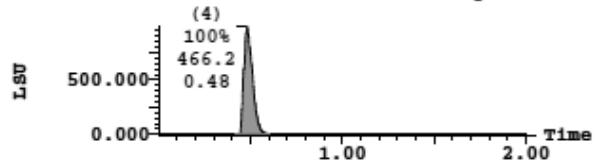

| Peak ID | Compound | Time | Mass Found |
|---------|----------|------|------------|
| 4       | Found    | 0.47 | 466.22     |

1:MS ES+  
1.0e+008

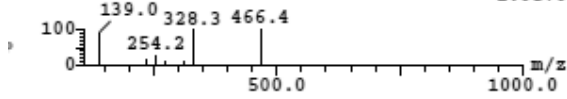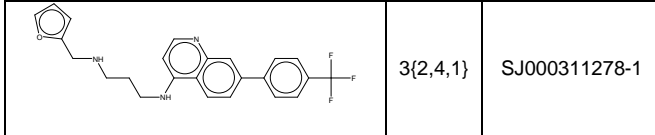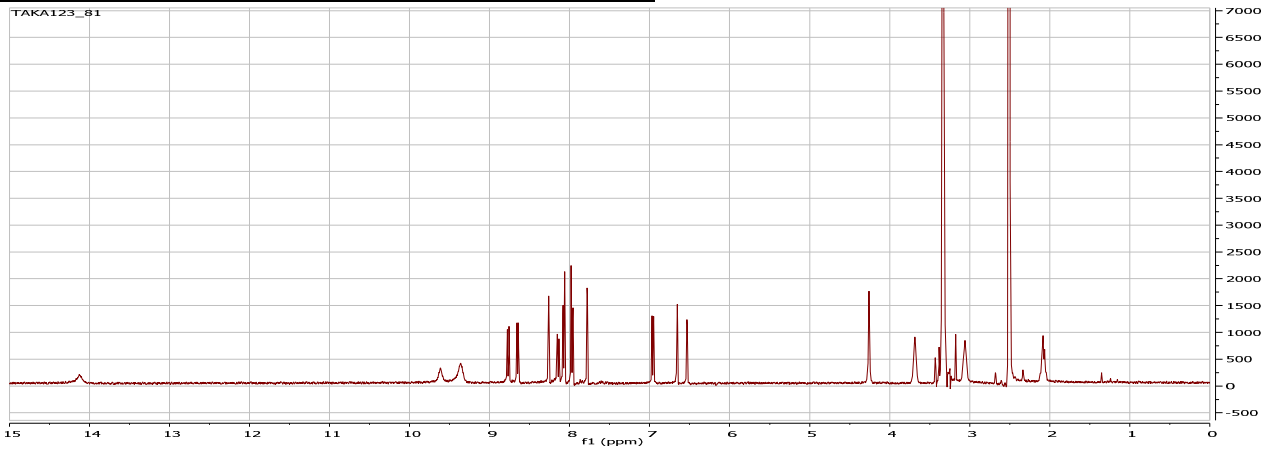

2: UV Detector: TIC

3.077e+2  
Range: 3.077e+2

(2) ELSD Signal

627.190  
Range: 627.102

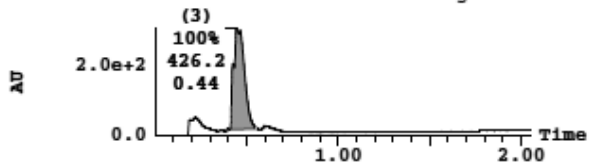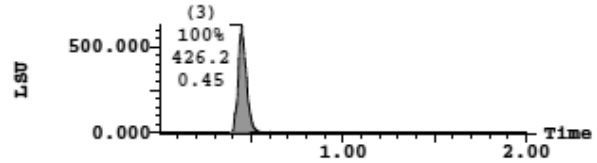

| Peak ID | Compound | Time | Mass Found |
|---------|----------|------|------------|
| 3       | Found    | 0.43 | 426.17     |

1:MS ES+  
7.9e+007

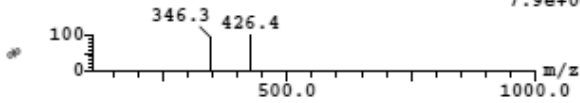

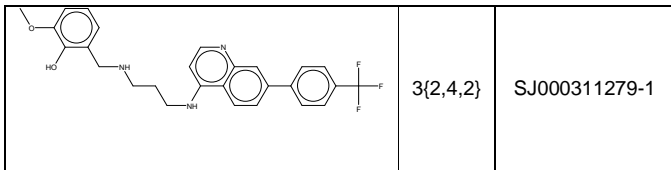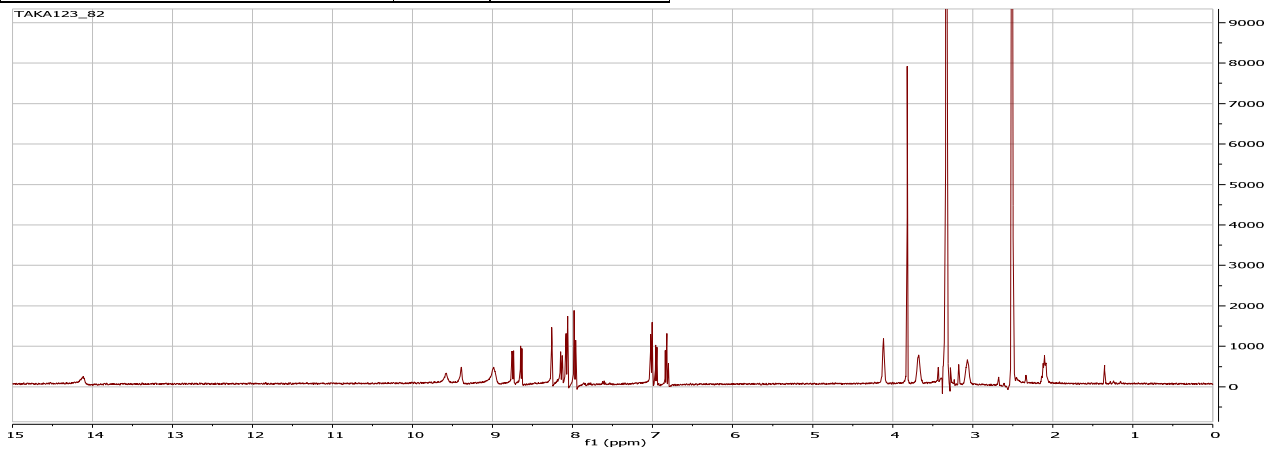

2: UV Detector: TIC 3.229e+2 (2) ELSD signal 1046.748  
Range: 3.229e+2 Range: 1046.727

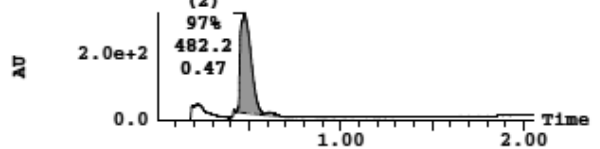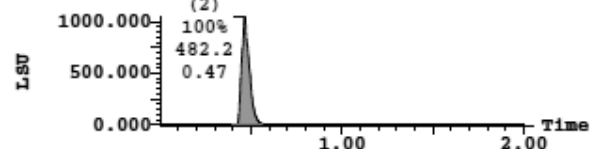

| Peak ID | Compound | Time | Mass Found |
|---------|----------|------|------------|
| 2       | Found    | 0.45 | 482.20     |

1: MS ES+  
9.8e+007

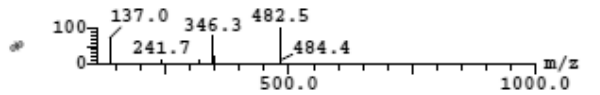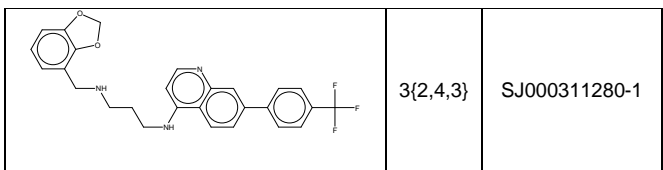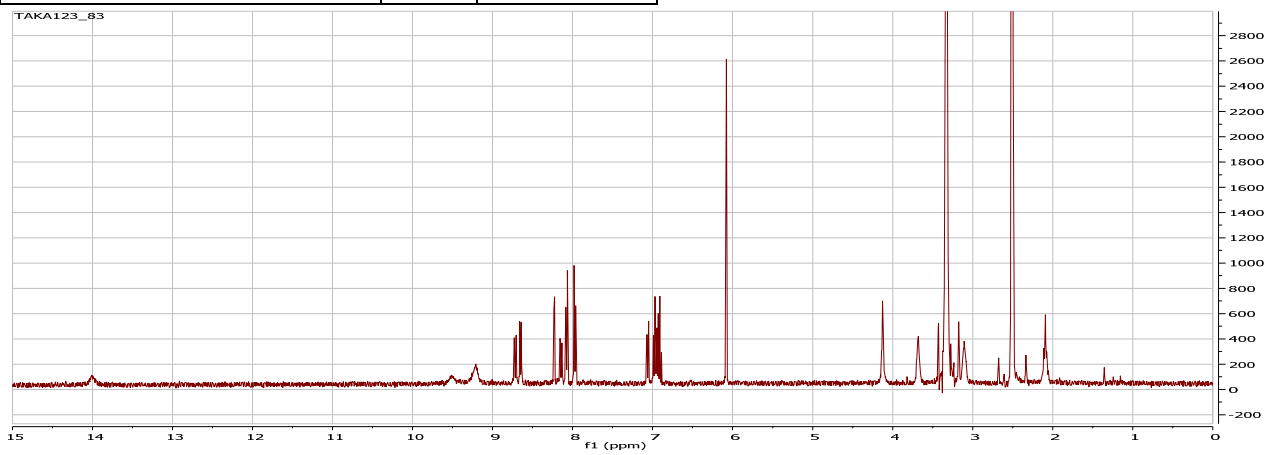

2: UV Detector: TIC

3.014e+2  
Range: 3.014e+2

(2) ELSD Signal

660.448  
Range: 660.421

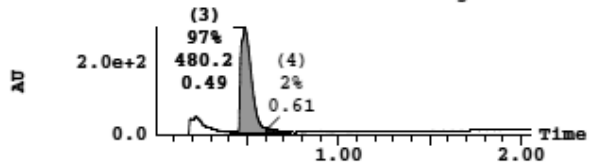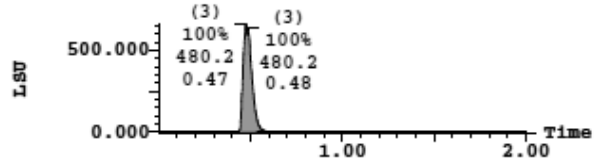

| Peak ID | Compound | Time | Mass Found |
|---------|----------|------|------------|
| 3       | Found    | 0.46 | 480.18     |

1:MS ES+  
1.1e+008

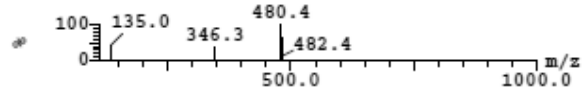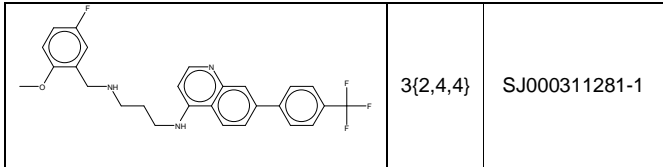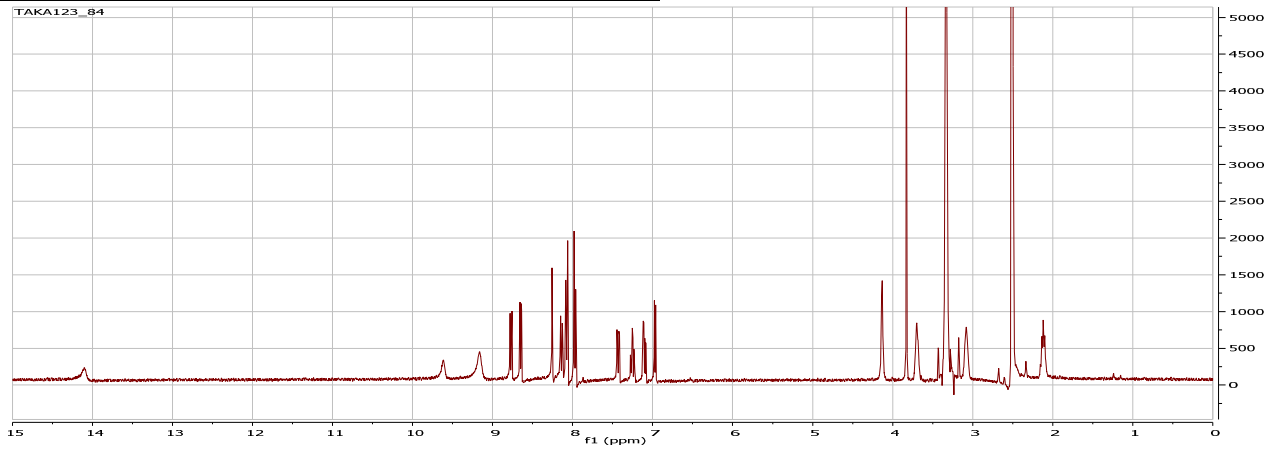

2: UV Detector: TIC

2.818e+2  
Range: 2.818e+2

(2) ELSD Signal

569.739  
Range: 569.620

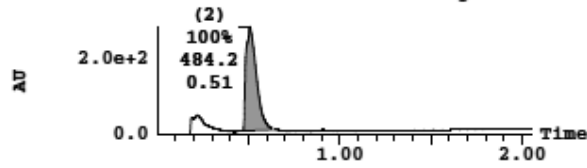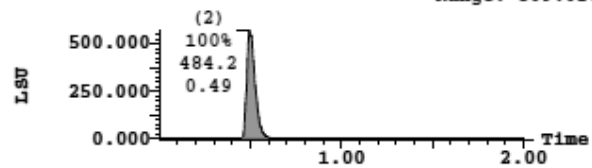

| Peak ID | Compound | Time | Mass Found |
|---------|----------|------|------------|
| 2       | Found    | 0.49 | 484.19     |

1:MS ES+  
1.1e+008

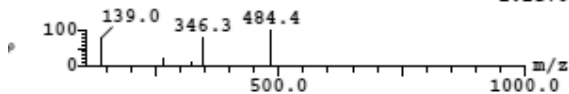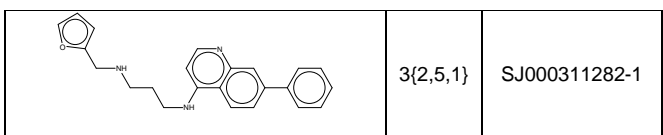

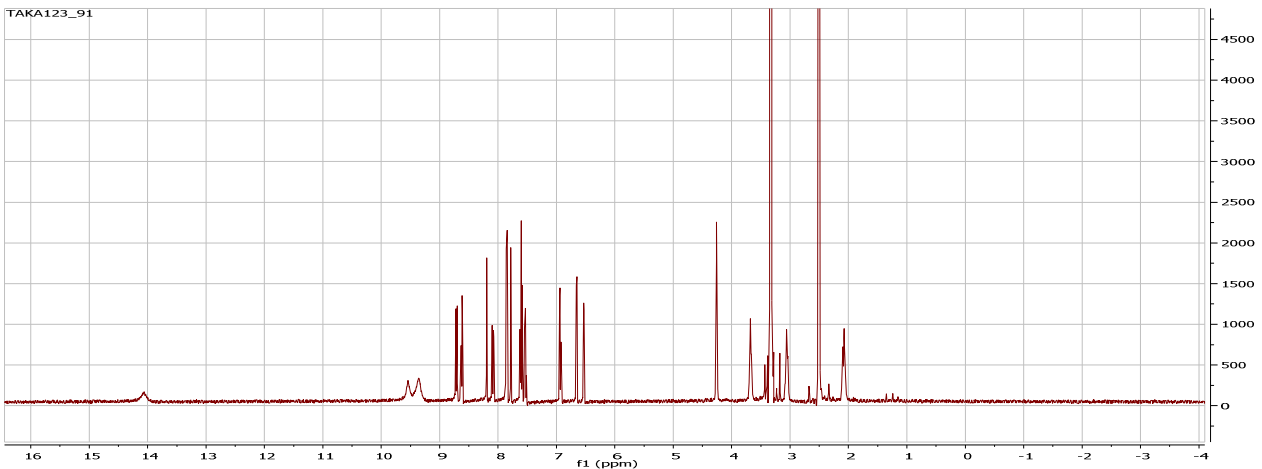

2: UV Detector: TIC

3.295e+2  
Range: 3.295e+2

(2) ELSD signal

752.256  
Range: 752.226

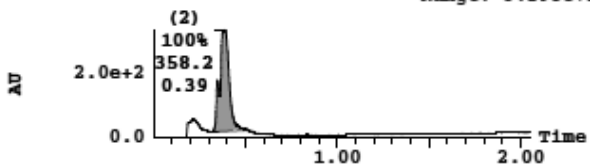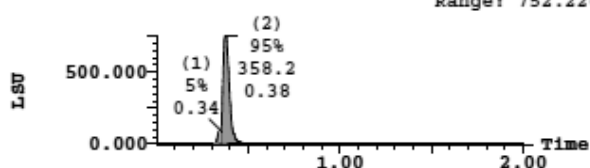

| Peak ID | Compound | Time | Mass Found |
|---------|----------|------|------------|
| 2       | Found    | 0.38 | 358.18     |

1: MS ES+  
7.6e+007

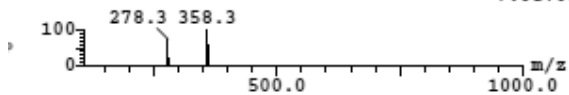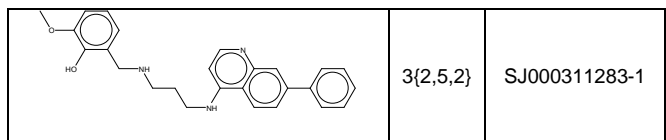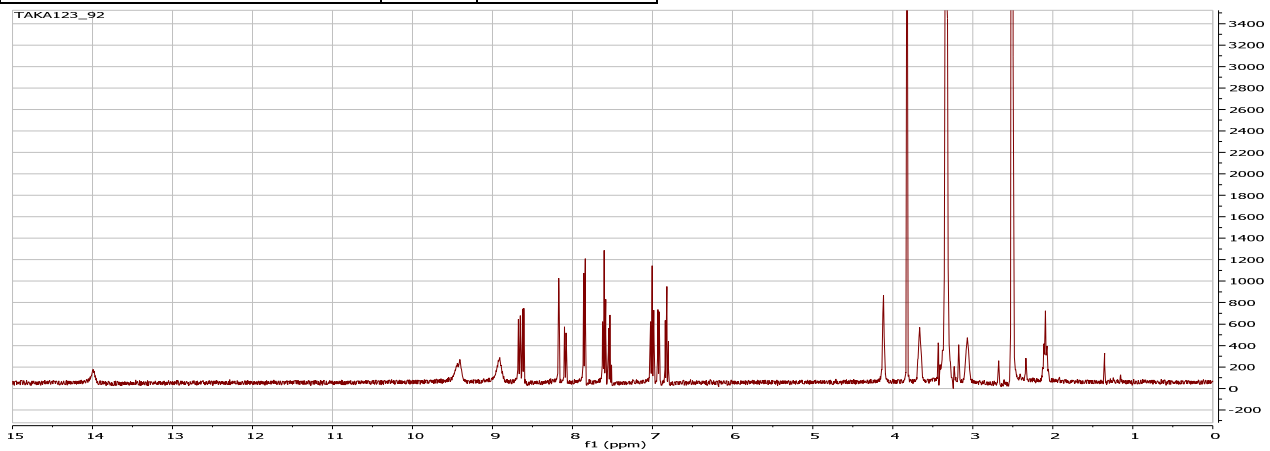

2: UV Detector: TIC

3.419e+2  
Range: 3.419e+2

(2) ELSD Signal

1111.511  
Range: 1111.445

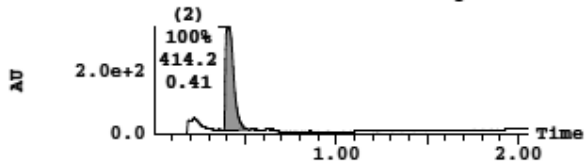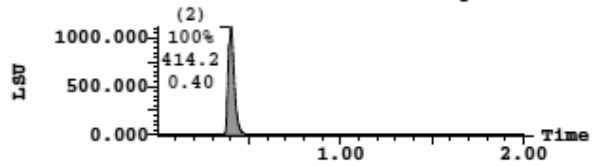

| Peak ID | Compound | Time | Mass Found |
|---------|----------|------|------------|
| 2       | Found    | 0.39 | 414.21     |

1:MS ES+  
8.1e+007

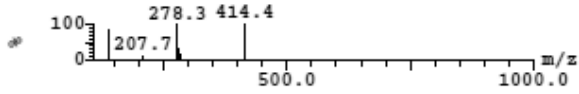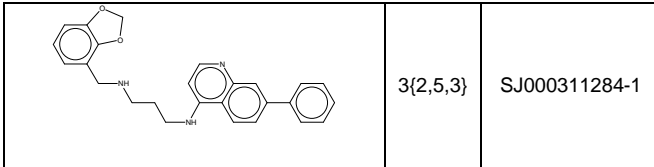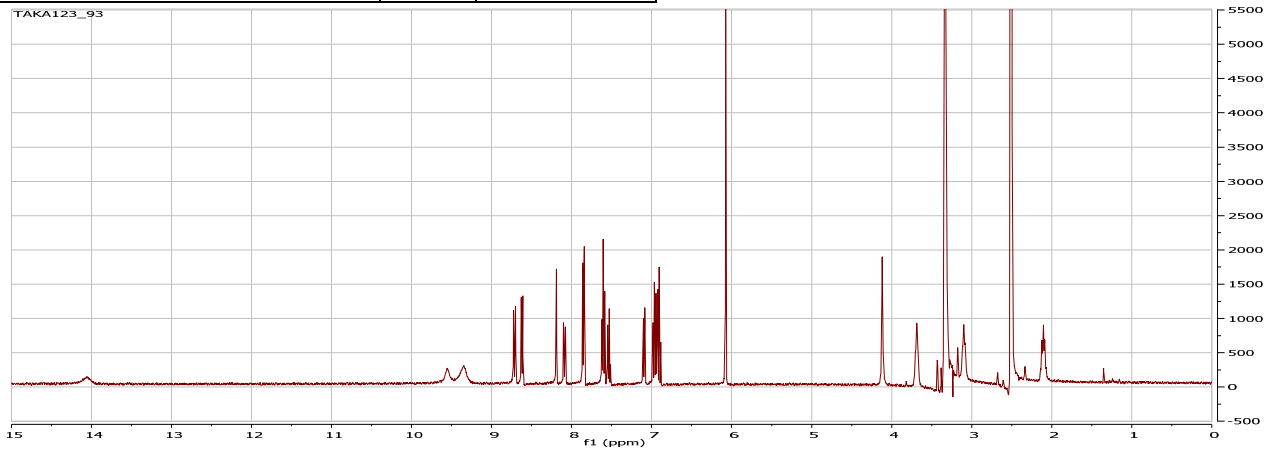

2: UV Detector: TIC

3.529e+2  
Range: 3.529e+2

(2) ELSD Signal

1330.226  
Range: 1330.159

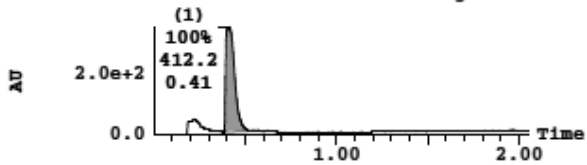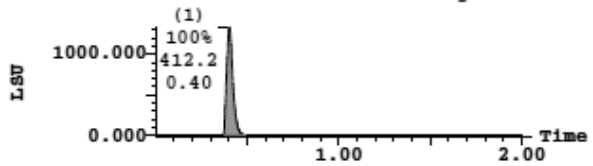

| Peak ID | Compound | Time | Mass Found |
|---------|----------|------|------------|
| 1       | Found    | 0.39 | 412.19     |

1:MS ES+  
9.1e+007

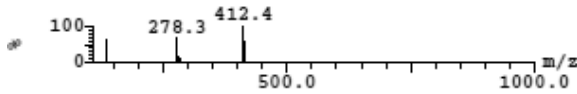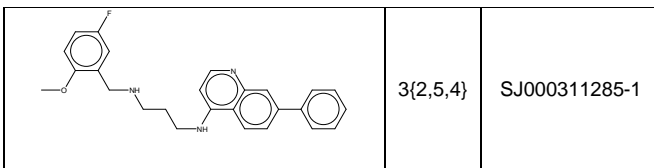

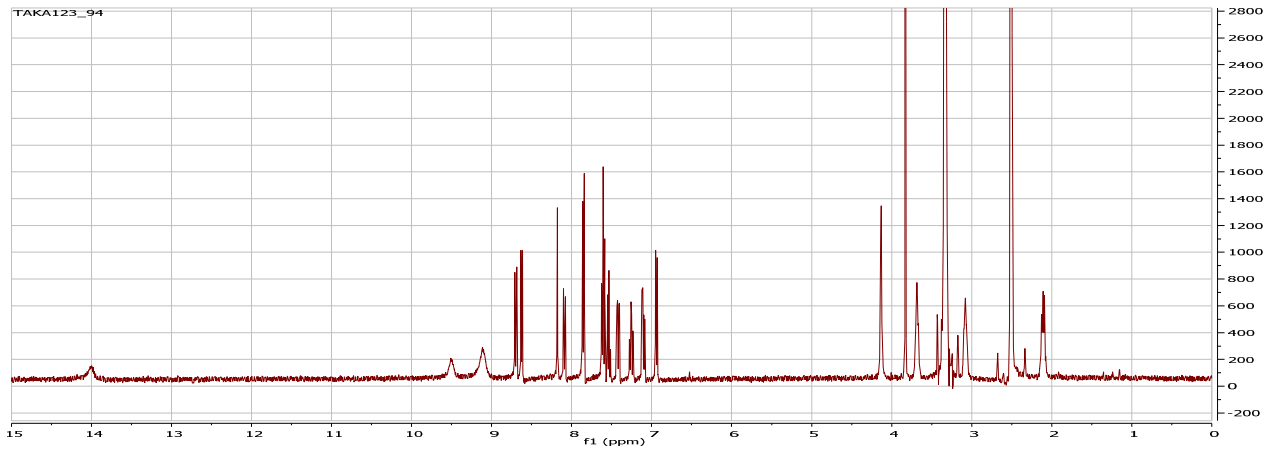

2: UV Detector: TIC

3.516e+2  
Range: 3.516e+2

(2) ELSD Signal

1463.979  
Range: 1463.906

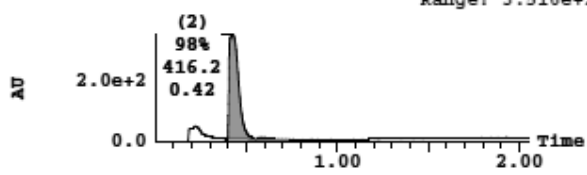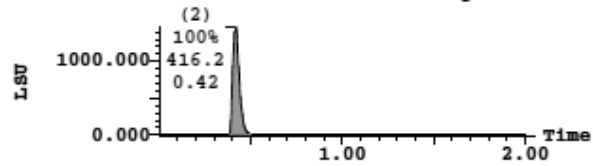

| Peak ID | Compound | Time | Mass Found |
|---------|----------|------|------------|
| 2       | Found    | 0.41 | 416.21     |

1:MS ES+  
9.3e+007

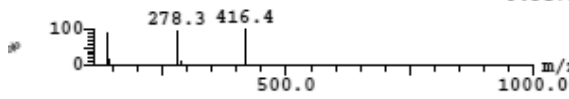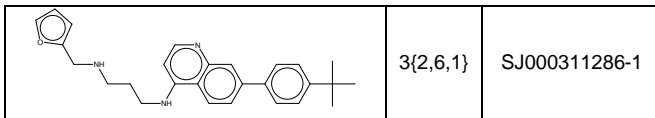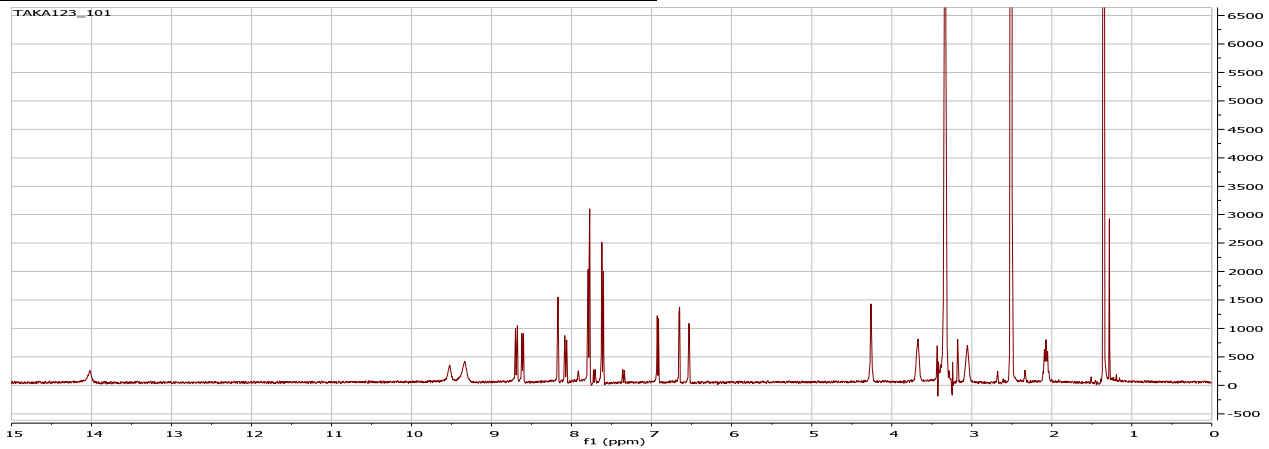



2: UV Detector: TIC 2.687e+2  
Range: 2.687e+2

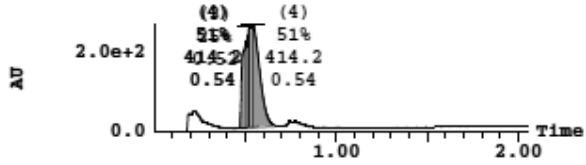

(2) ELSD Signal 474.544  
Range: 474.516

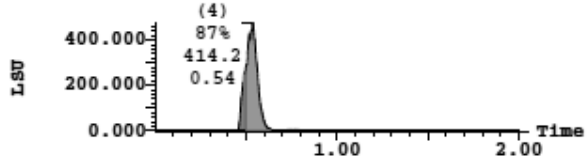

| Peak ID | Compound Found | Time | Mass Found |
|---------|----------------|------|------------|
| 4       | Found          | 0.58 | 414.25     |

1:MS ES+  
8.0e+007

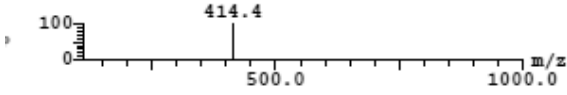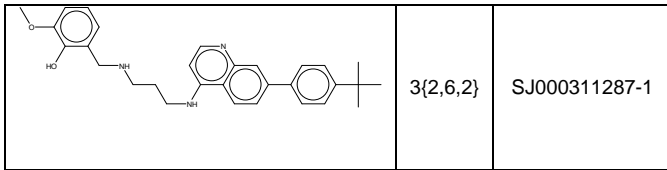

TAKA123\_102

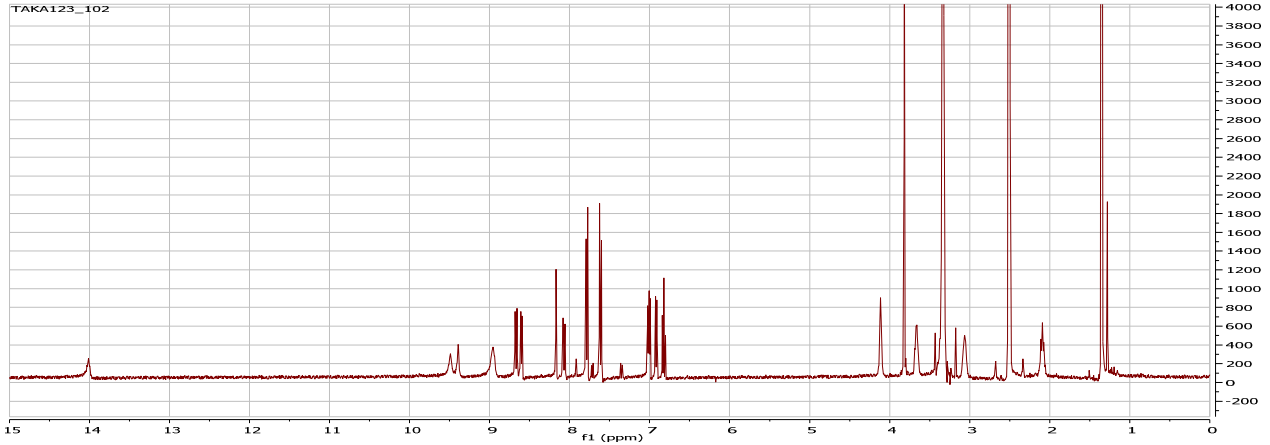

2: UV Detector: TIC 3.321e+2  
Range: 3.321e+2

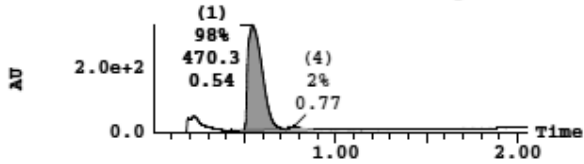

(2) ELSD Signal 1114.774  
Range: 1114.741

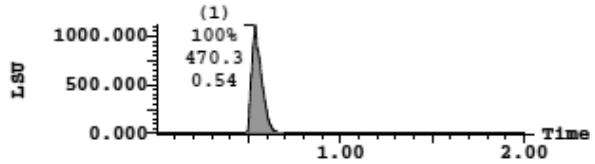

| Peak ID | Compound Found | Time | Mass Found |
|---------|----------------|------|------------|
| 1       | Found          | 0.53 | 470.27     |

1:MS ES+  
1.0e+008

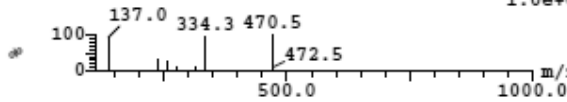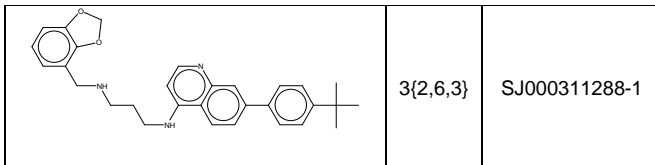

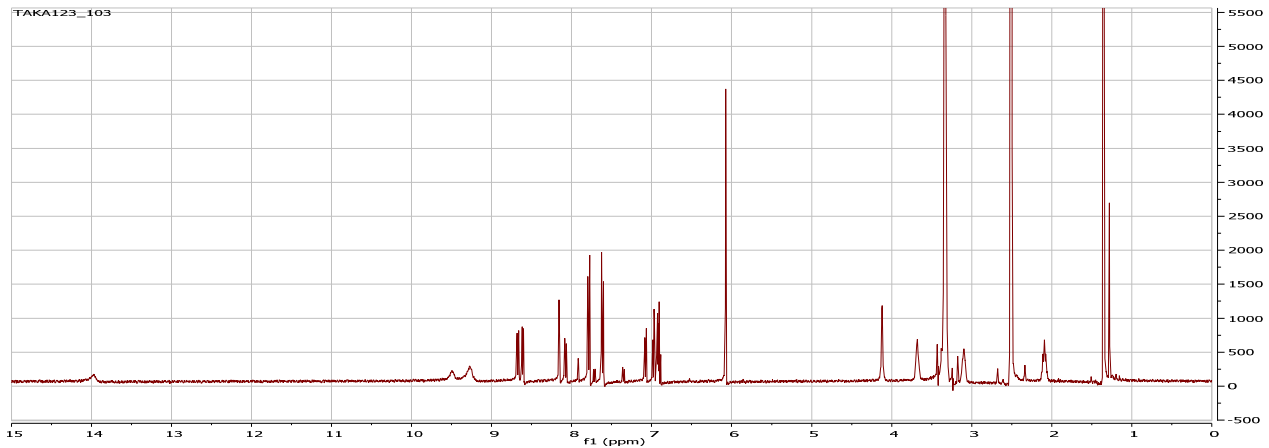

2: UV Detector: TIC

3.332e+2  
Range: 3.332e+2

(2) ELSD signal

980.542  
Range: 980.533

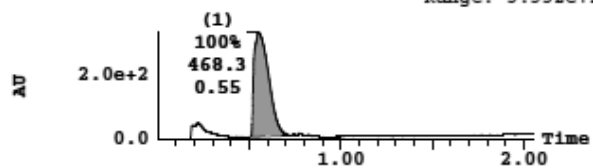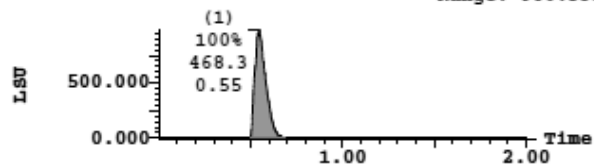

| Peak ID | Compound | Time | Mass Found |
|---------|----------|------|------------|
| 1       | Found    | 0.54 | 468.26     |

1:MS ES+  
1.2e+008

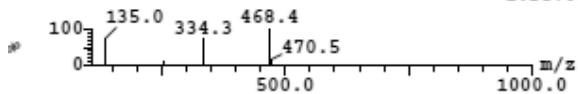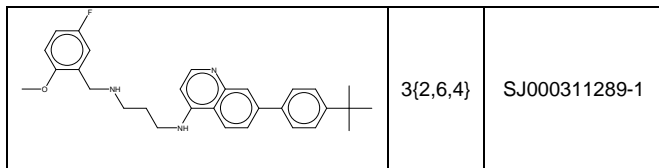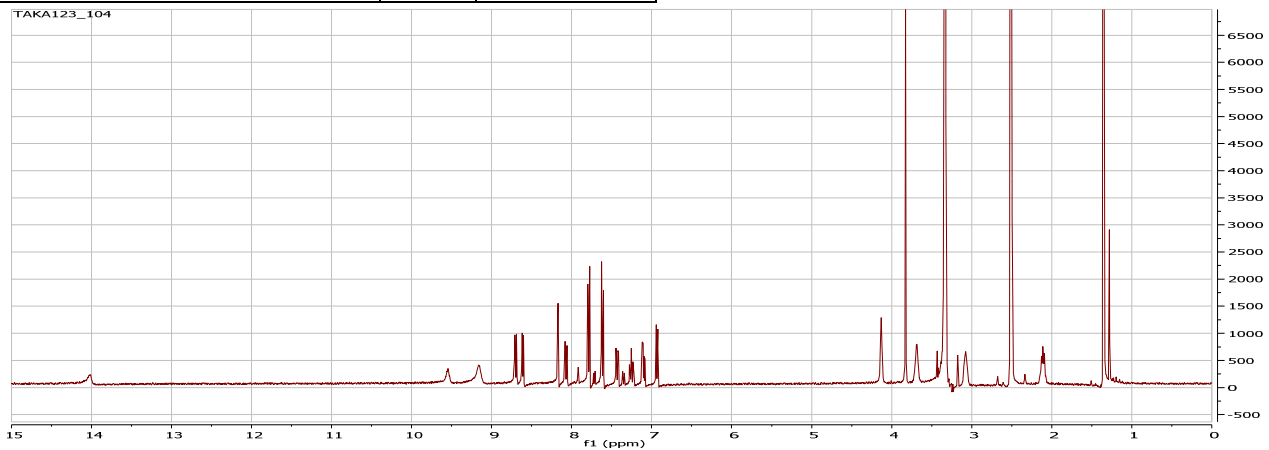

2: UV Detector: TIC 3.098e+2  
Range: 3.098e+2

(2) ELSD Signal

876.415  
Range: 876.301

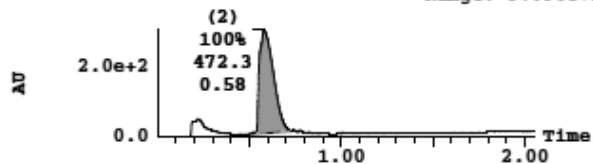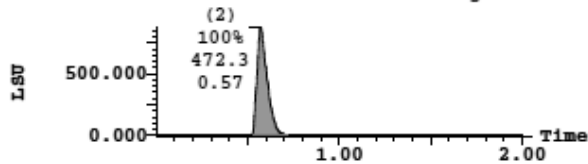

| Peak ID | Compound | Time | Mass Found |
|---------|----------|------|------------|
| 2       | Found    | 0.58 | 472.27     |

1:MS ES+  
1.1e+008

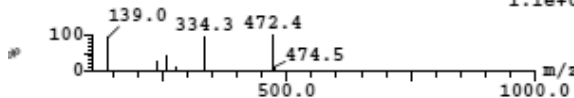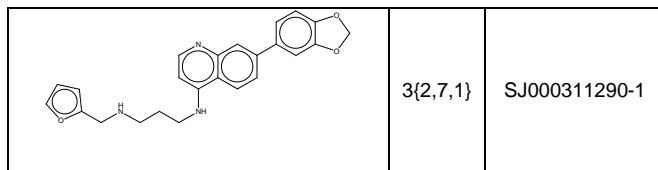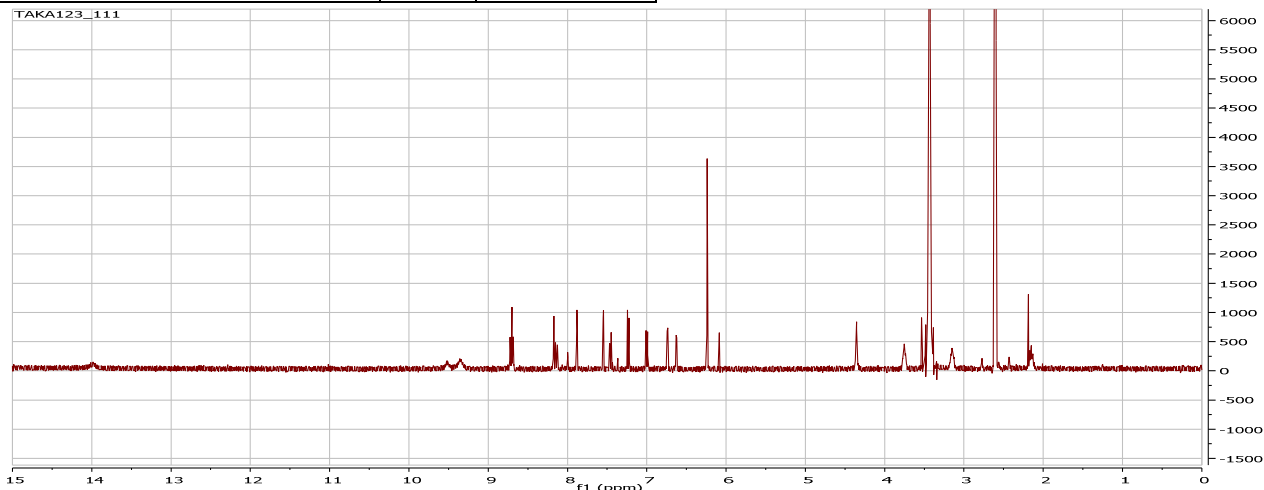

2: UV Detector: TIC

3.721e+2  
Range: 3.721e+2

(2) ELSD Signal

635.899  
Range: 635.702

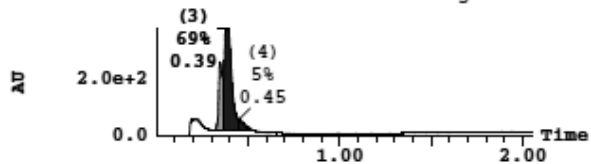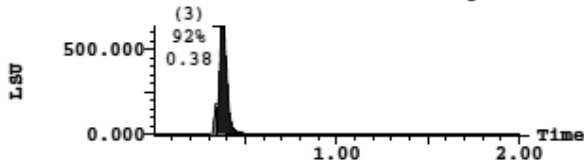

1: MS ES+ :TIC

5.1e+009

| Peak ID | Compound | Time | Mass Found |
|---------|----------|------|------------|
| 2       | Found    | 0.36 | 402.17     |

1:MS ES+  
7.5e+007

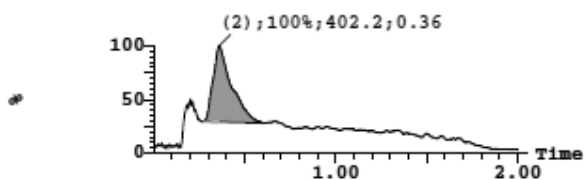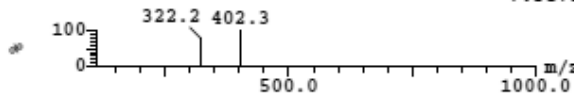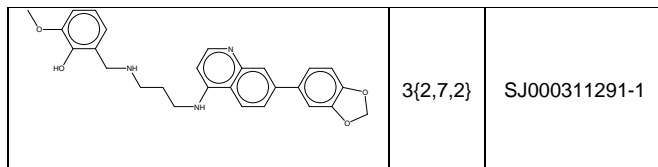

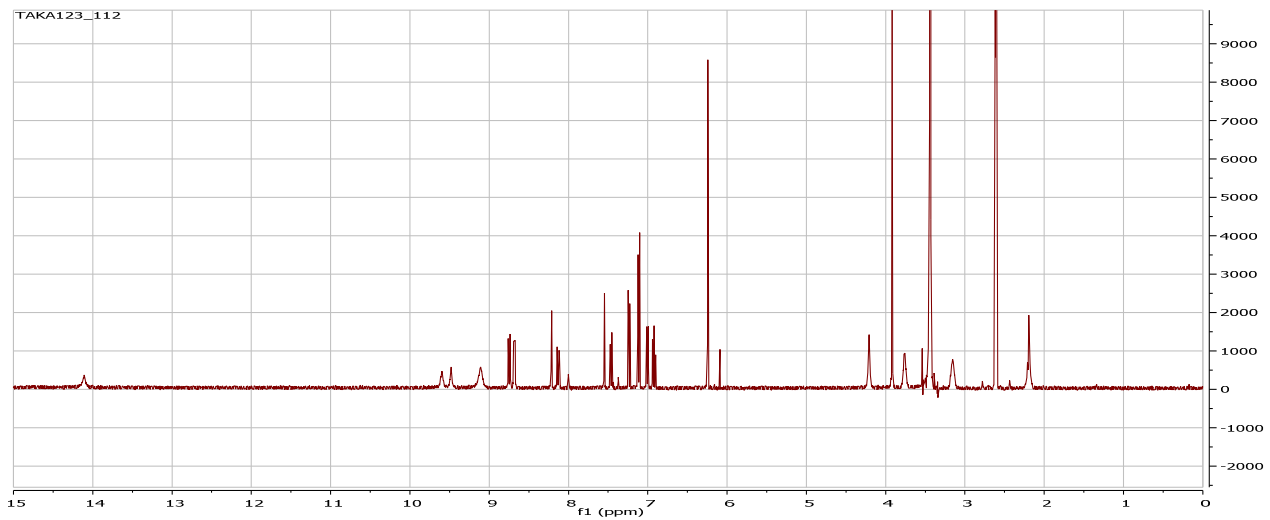

2: UV Detector: TIC

4.113e+2  
Range: 4.113e+2

(2) ELSD Signal

1973.171  
Range: 1973.111

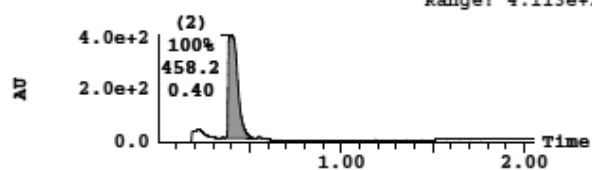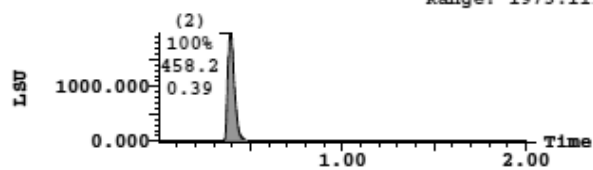

| Peak ID | Compound | Time | Mass Found |
|---------|----------|------|------------|
| 2       | Found    | 0.38 | 458.20     |

1:MS ES+  
8.7e+007

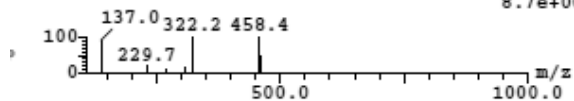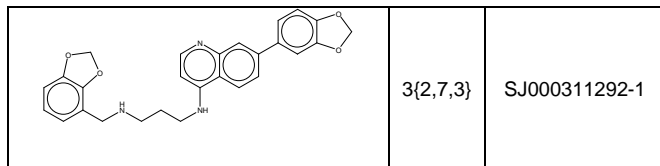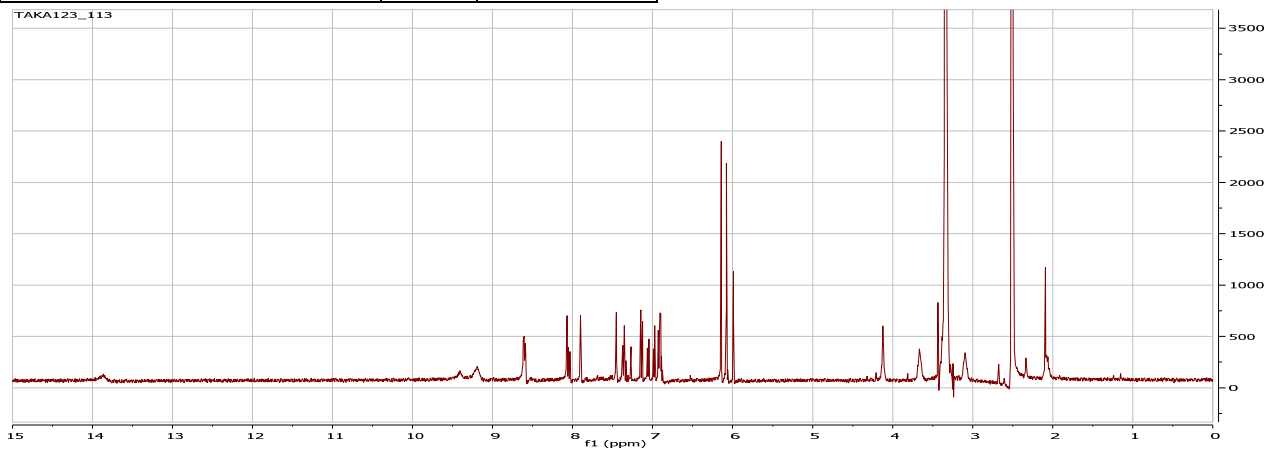

2: UV Detector: TIC

3.842e+2  
Range: 3.842e+2

(2) ELSD Signal

1113.967  
Range: 1113.956

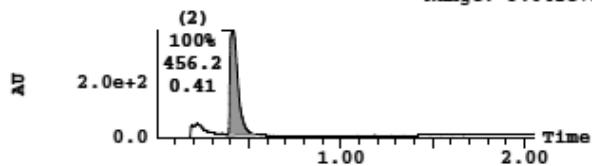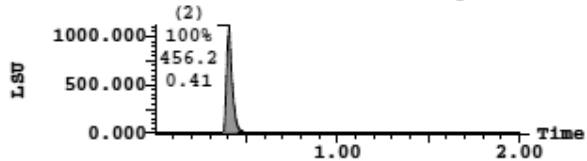

| Peak ID | Compound | Time | Mass Found |
|---------|----------|------|------------|
| 2       | Found    | 0.39 | 456.18     |

1:MS ES+  
8.7e+007

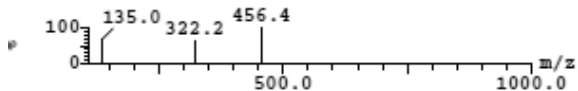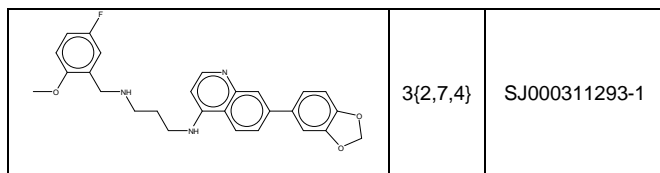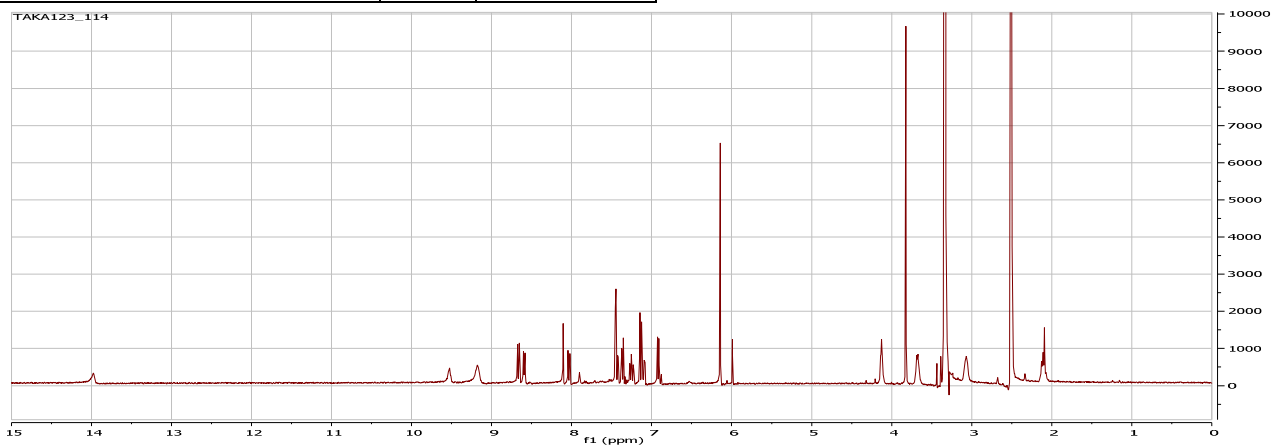

2: UV Detector: TIC

3.93e+2  
Range: 3.93e+2

(2) ELSD signal

1278.421  
Range: 1278.319

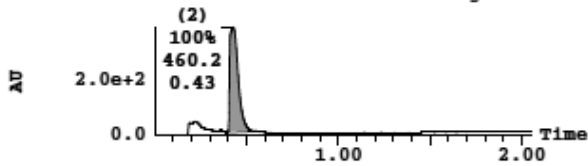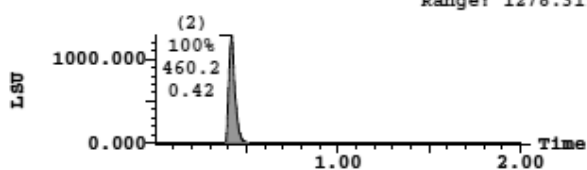

| Peak ID | Compound | Time | Mass Found |
|---------|----------|------|------------|
| 2       | Found    | 0.41 | 460.20     |

1:MS ES+  
8.3e+007

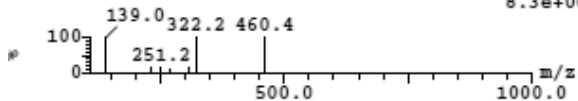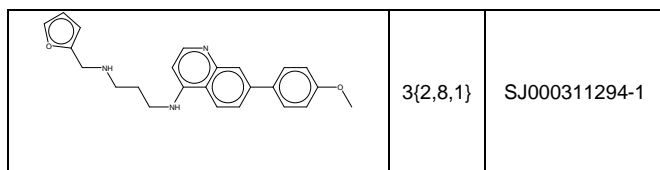

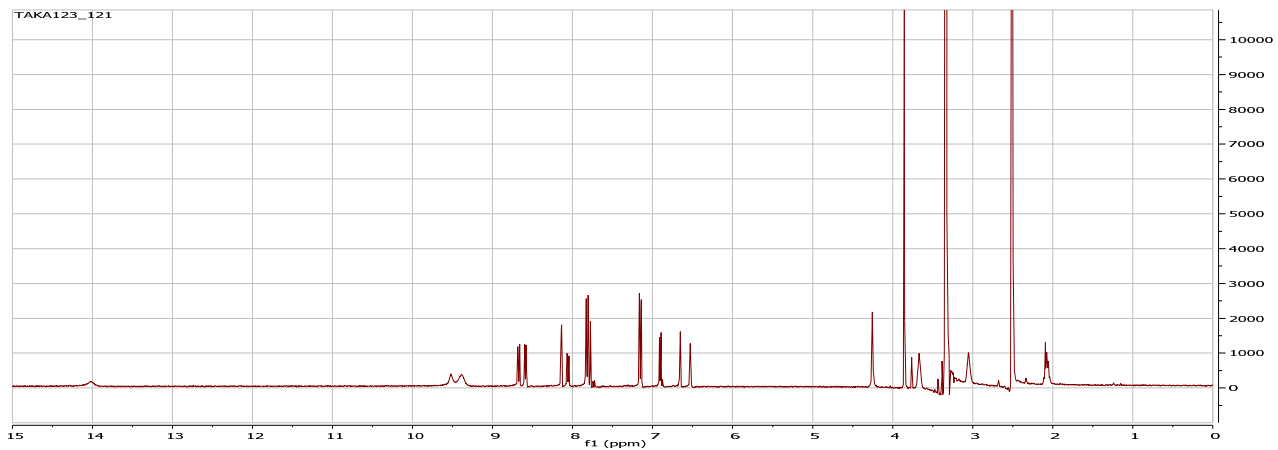

2: UV Detector: TIC

3.678e+2  
Range: 3.678e+2

(2) ELSD Signal

977.543  
Range: 977.376

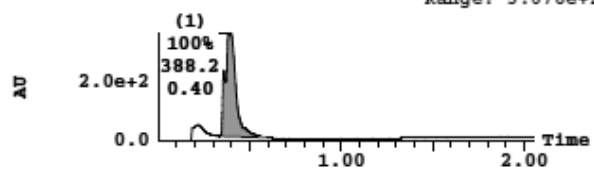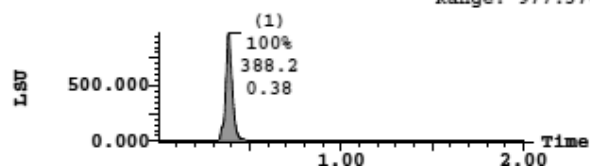

| Peak ID | Compound | Time | Mass Found |
|---------|----------|------|------------|
| 1       | Found    | 0.37 | 388.19     |

1:MS ES+  
7.9e+007

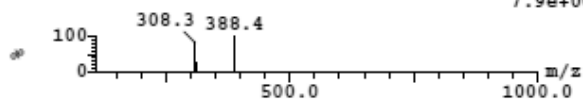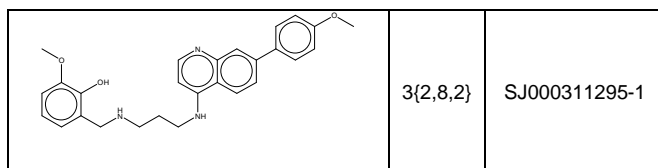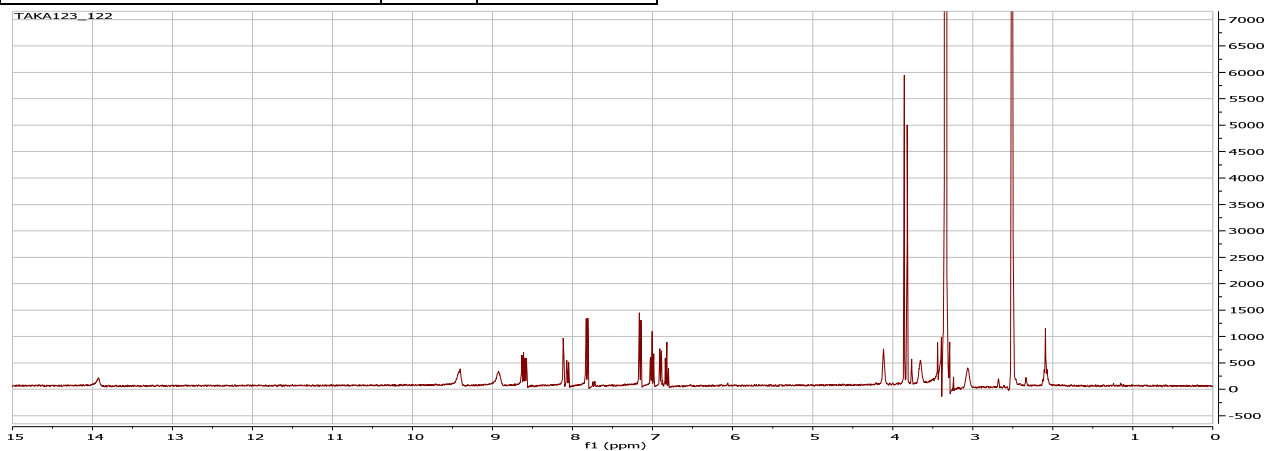

2: UV Detector: TIC

3.729e+2  
Range: 3.729e+2

(2) ELSD Signal

1295.556  
Range: 1295.491

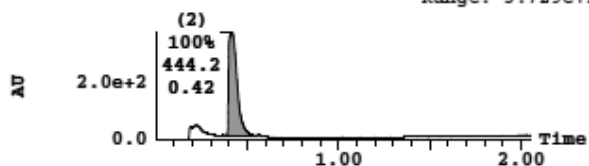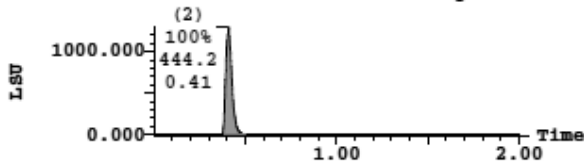

| Peak ID | Compound Found | Time | Mass Found |
|---------|----------------|------|------------|
| 2       | Found          | 0.39 | 444.22     |

1:MS ES+  
8.3e+007

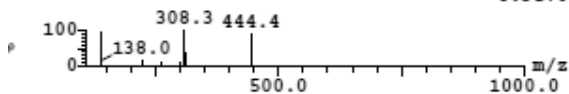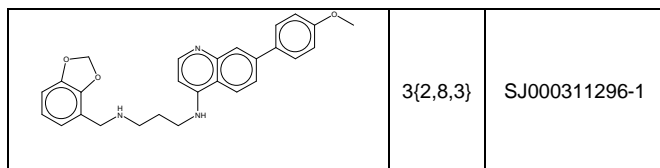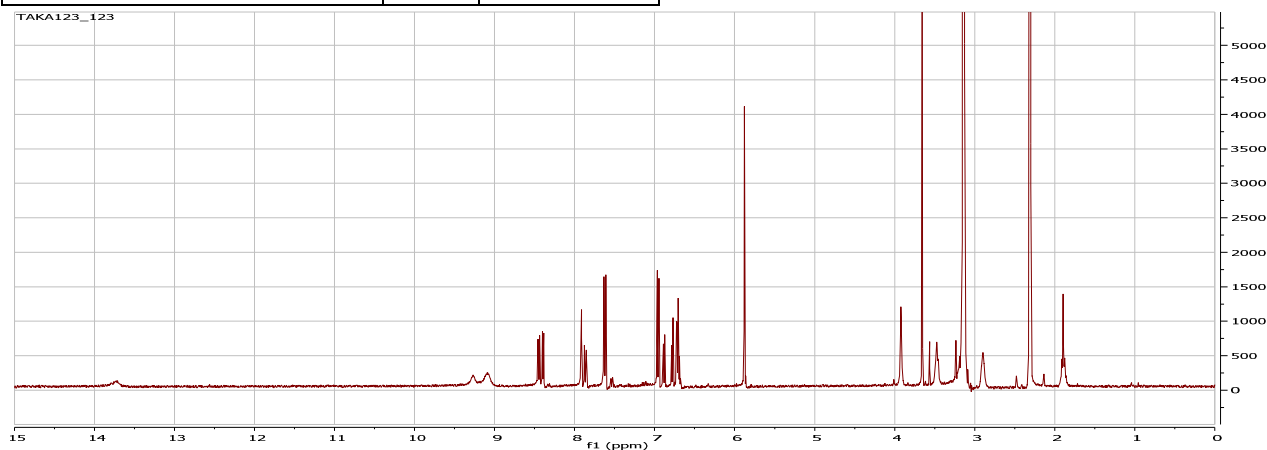

2: UV Detector: TIC

3.77e+2  
Range: 3.77e+2

(2) ELSD Signal

1388.959  
Range: 1388.931

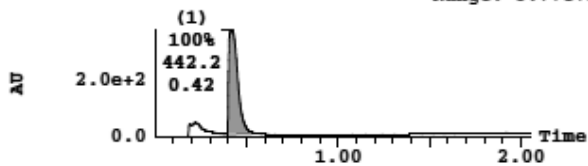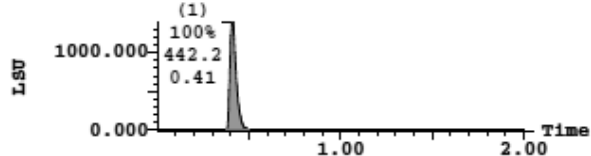

| Peak ID | Compound Found | Time | Mass Found |
|---------|----------------|------|------------|
| 1       | Found          | 0.40 | 442.21     |

1:MS ES+  
9.5e+007

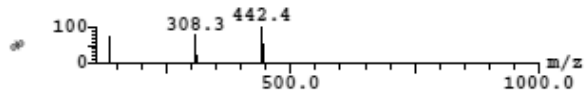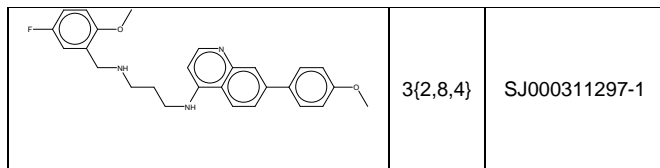

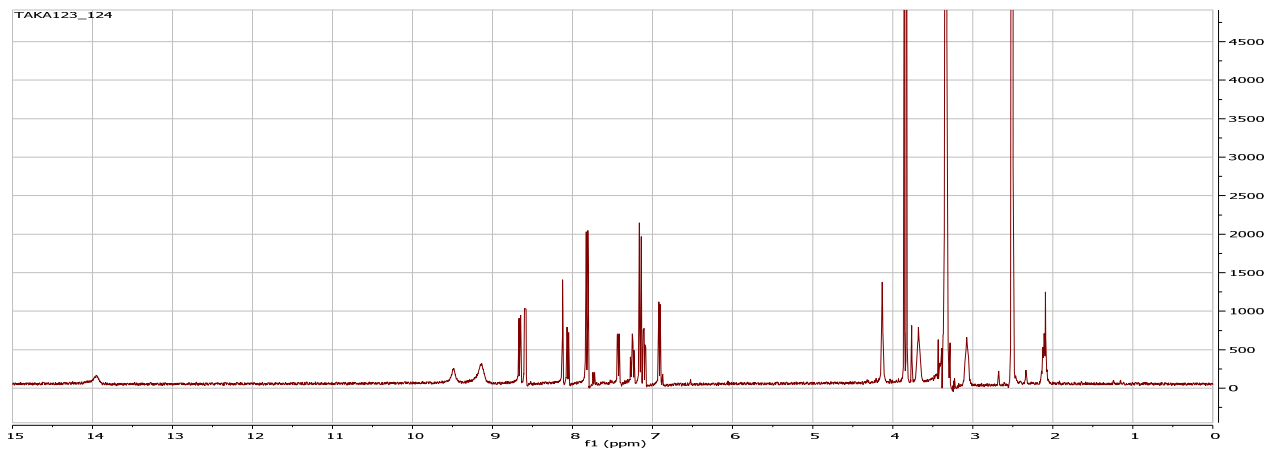

2: UV Detector: TIC

3.734e+2 (2) ELSD Signal  
Range: 3.734e+2

1331.206  
Range: 1331.139

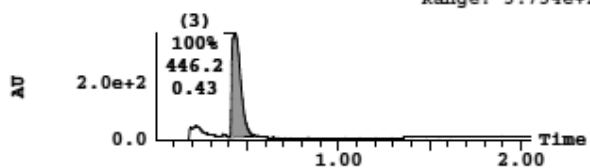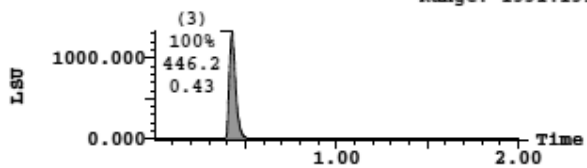

| Peak ID | Compound | Time | Mass Found |
|---------|----------|------|------------|
| 3       | Found    | 0.41 | 446.22     |

1:MS ES+  
8.9e+007

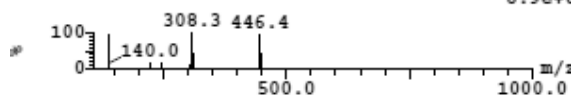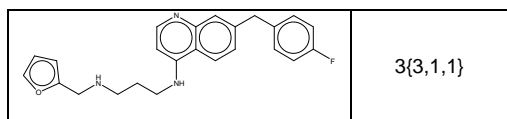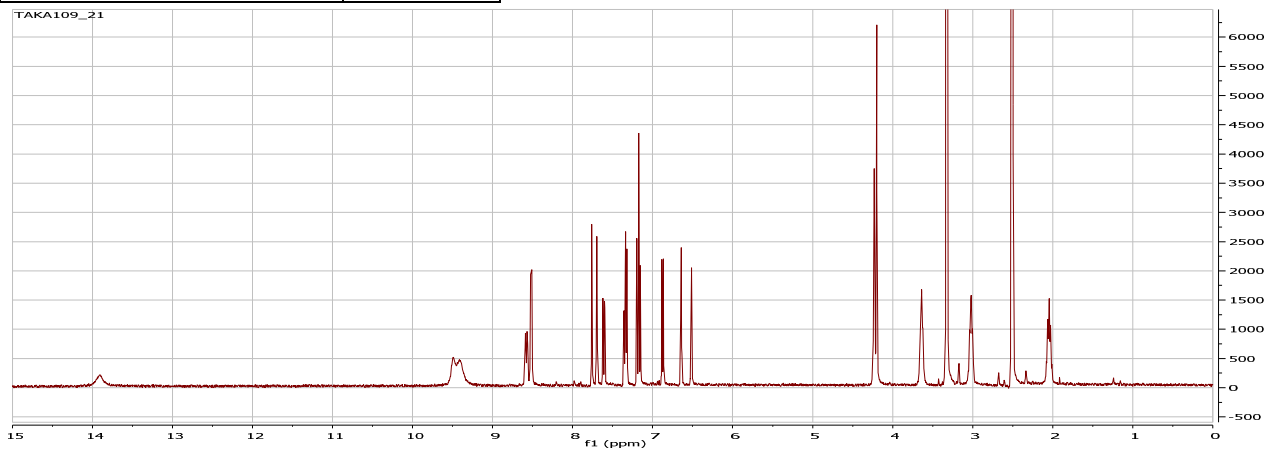



2: UV Detector: TIC Range: 2.608e+2

(2) ELSD Signal Range: 797.244  
797.189

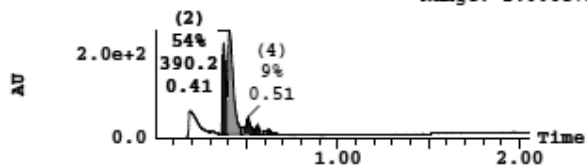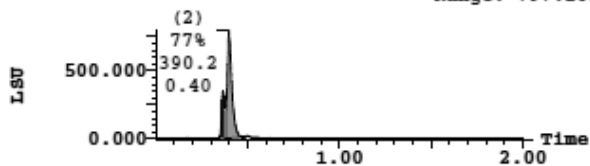

| Peak ID | Compound | Time | Mass Found |
|---------|----------|------|------------|
| 2       | Found    | 0.38 | 390.19     |

1:MS ES+  
6.5e+007

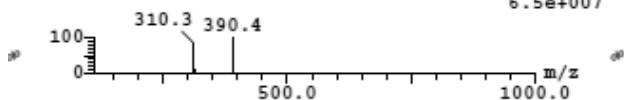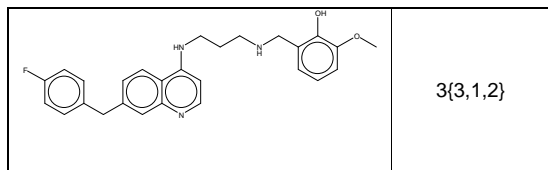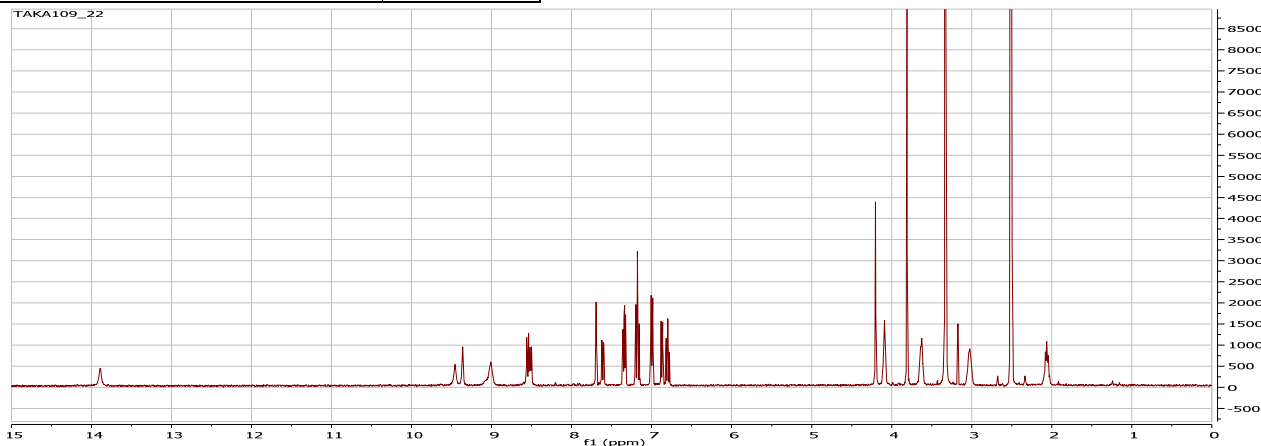

2: UV Detector: TIC Range: 2.846e+2

(2) ELSD Signal Range: 1299.995  
1299.930

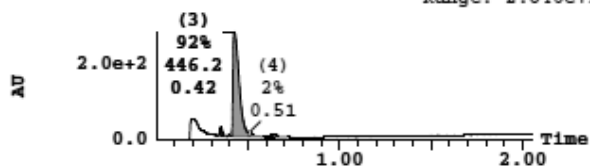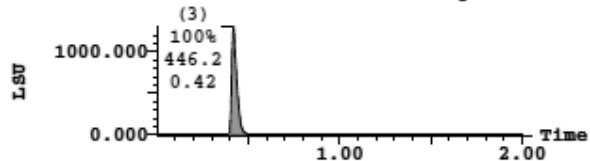

| Peak ID | Compound | Time | Mass Found |
|---------|----------|------|------------|
| 3       | Found    | 0.41 | 446.22     |

1:MS ES+  
7.6e+007

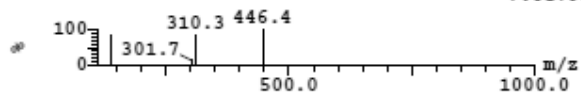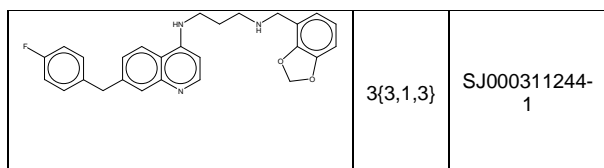

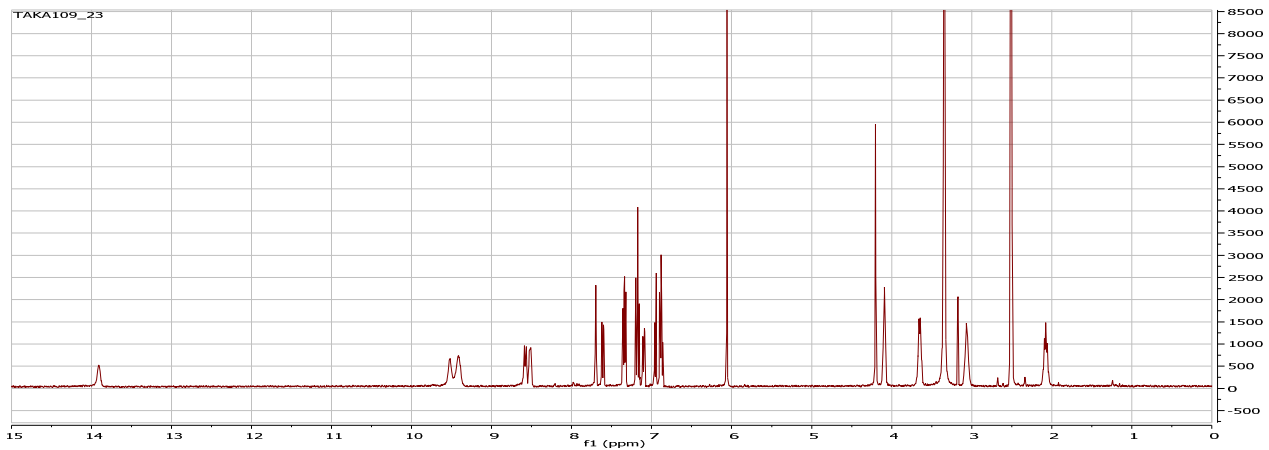

2: UV Detector: TIC

2.979e+2 (2) ELSD Signal

1332.146

Range: 2.979e+2

Range: 1332.106

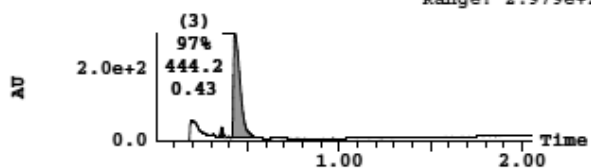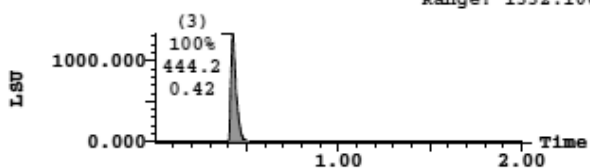

| Peak ID | Compound | Time | Mass Found |
|---------|----------|------|------------|
| 3       | Found    | 0.41 | 444.20     |

1:MS ES+  
8.4e+007

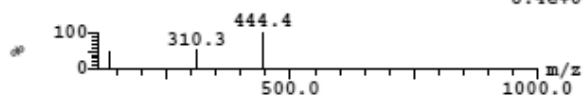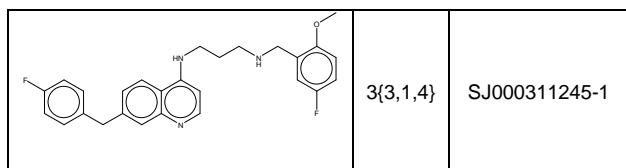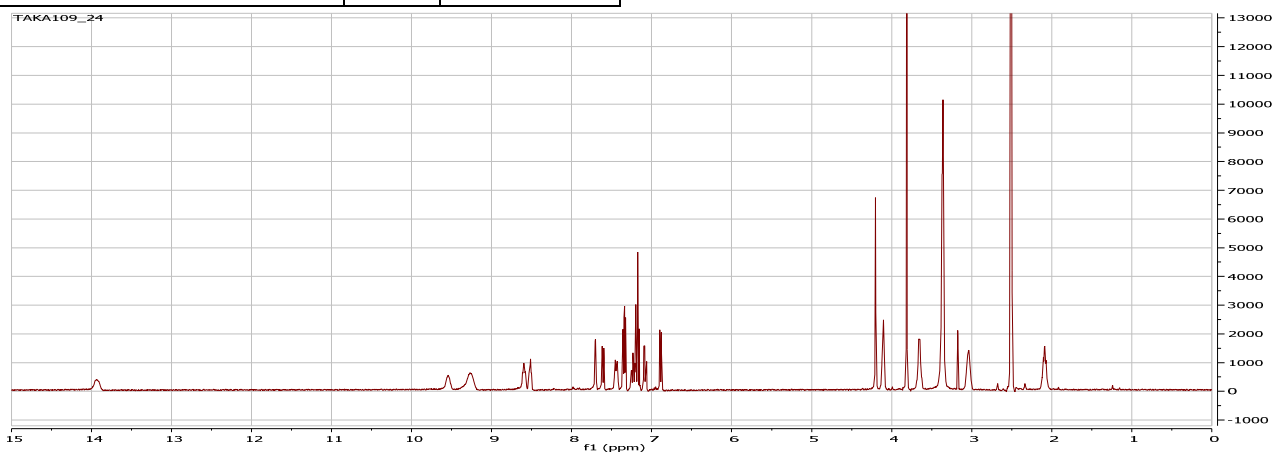

2: UV Detector: TIC

3.27e+2 (2) ELSD Signal  
Range: 3.27e+2

1973.116  
Range: 1972.938

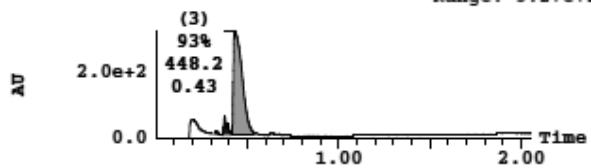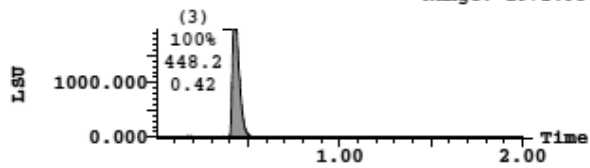

| Peak ID | Compound | Time | Mass Found |
|---------|----------|------|------------|
| 3       | Found    | 0.42 | 448.21     |

1:MS ES+  
8.9e+007

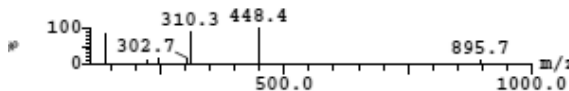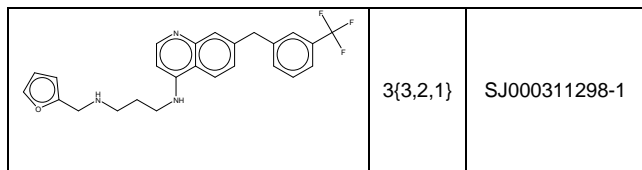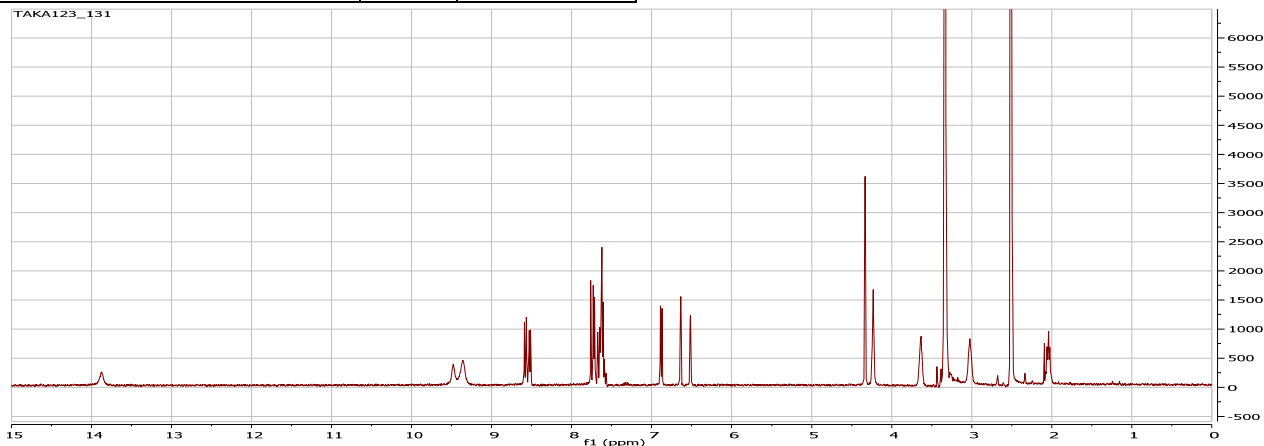

2: UV Detector: TIC

2.447e+2 (2) ELSD Signal  
Range: 2.447e+2

944.683  
Range: 944.674

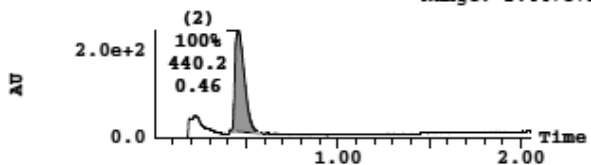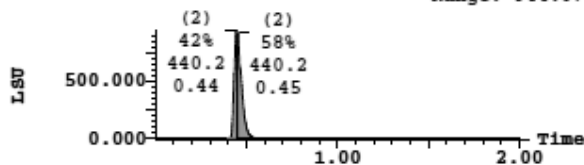

| Peak ID | Compound | Time | Mass Found |
|---------|----------|------|------------|
| 2       | Found    | 0.43 | 440.19     |

1:MS ES+  
9.0e+007

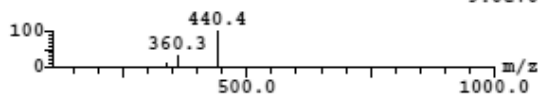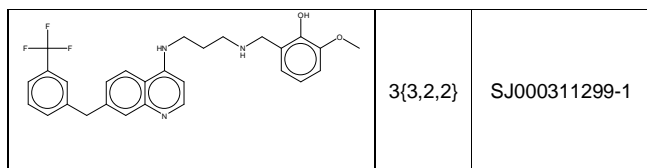

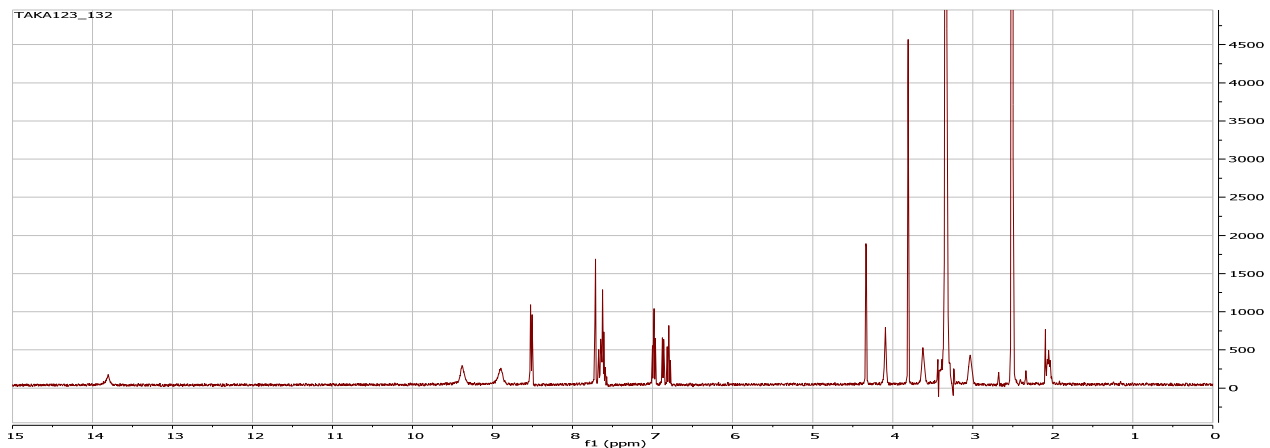

2: UV Detector: TIC

2.598e+2  
Range: 2.598e+2

(2) ELSD Signal

1119.397  
Range: 1119.319

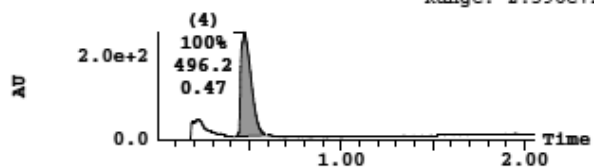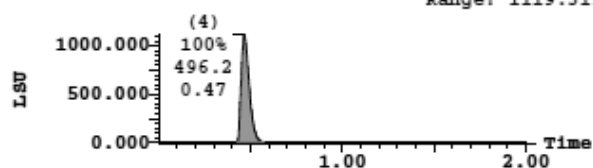

| Peak ID | Compound | Time | Mass Found |
|---------|----------|------|------------|
| 4       | Found    | 0.46 | 496.21     |

1:MS ES+  
1.1e+008

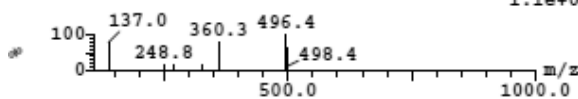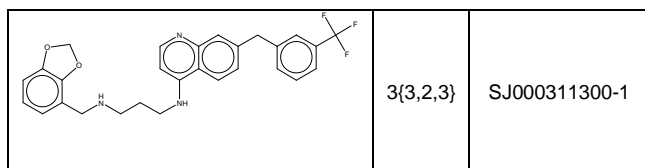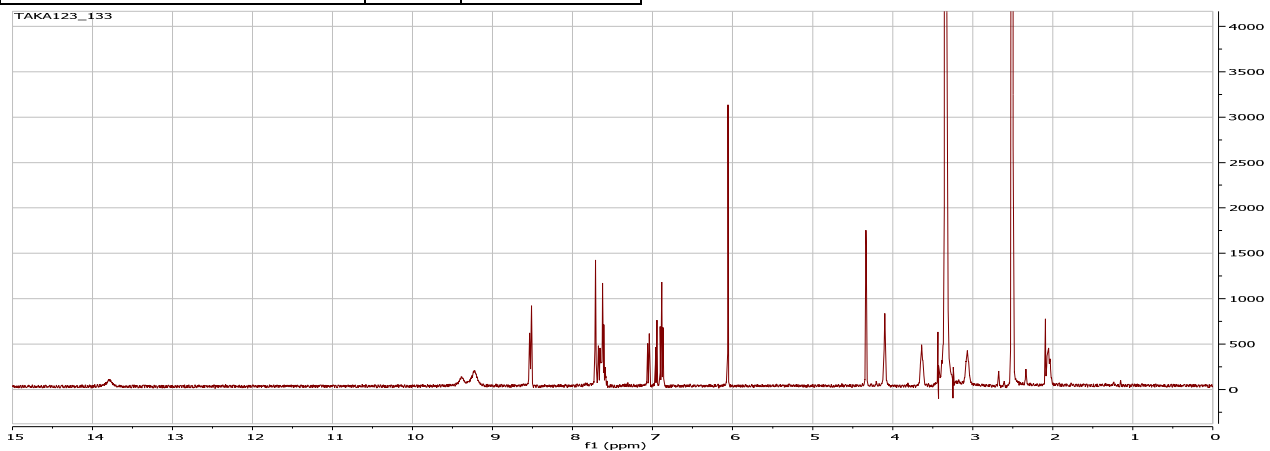

2: UV Detector: TIC

2.618e+2  
Range: 2.618e+2

(2) ELSD signal

1112.085  
Range: 1111.907

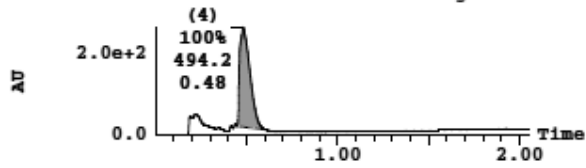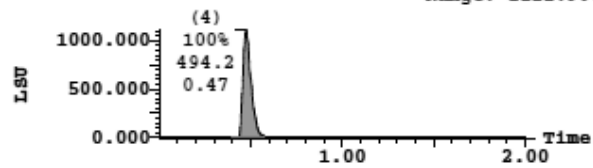

| Peak ID | Compound | Time | Mass Found |
|---------|----------|------|------------|
| 4       | Found    | 0.48 | 494.20     |

1:MS ES+  
1.0e+008

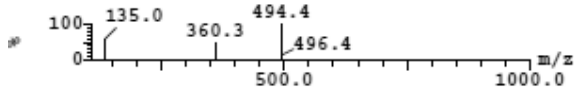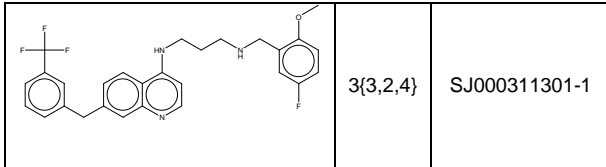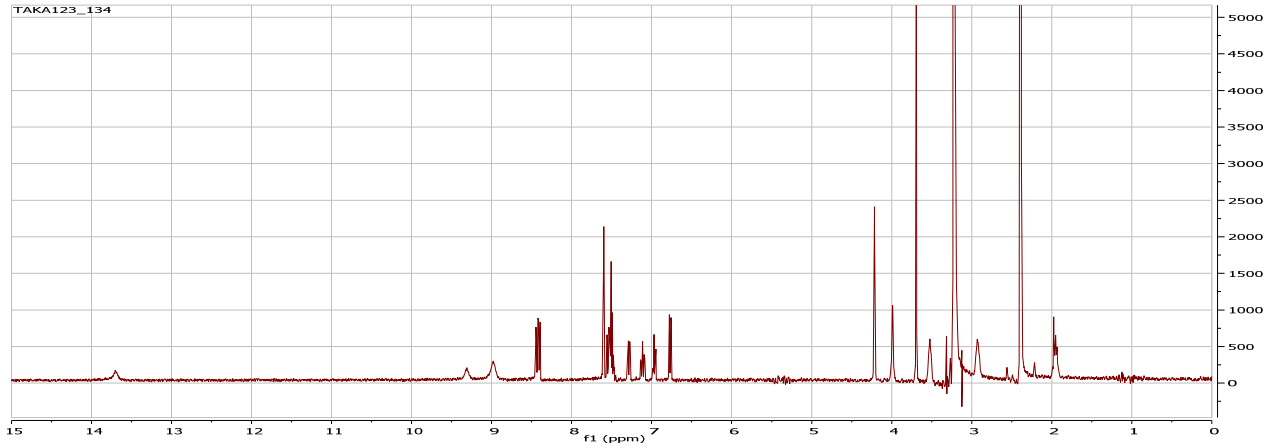

2: UV Detector: TIC

2.603e+2  
Range: 2.603e+2

(2) ELSD signal

1136.186  
Range: 1136.163

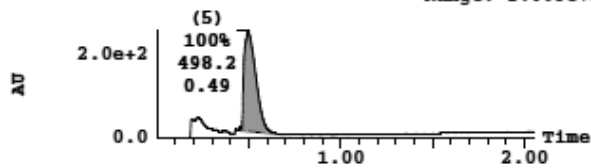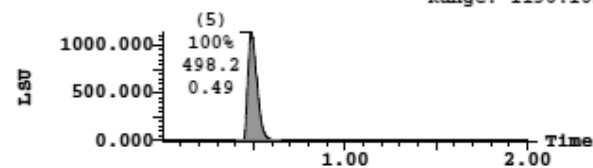

| Peak ID | Compound | Time | Mass Found |
|---------|----------|------|------------|
| 5       | Found    | 0.47 | 498.21     |

1:MS ES+  
1.1e+008

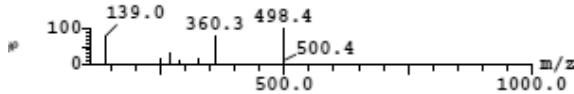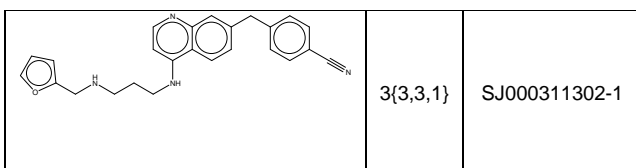

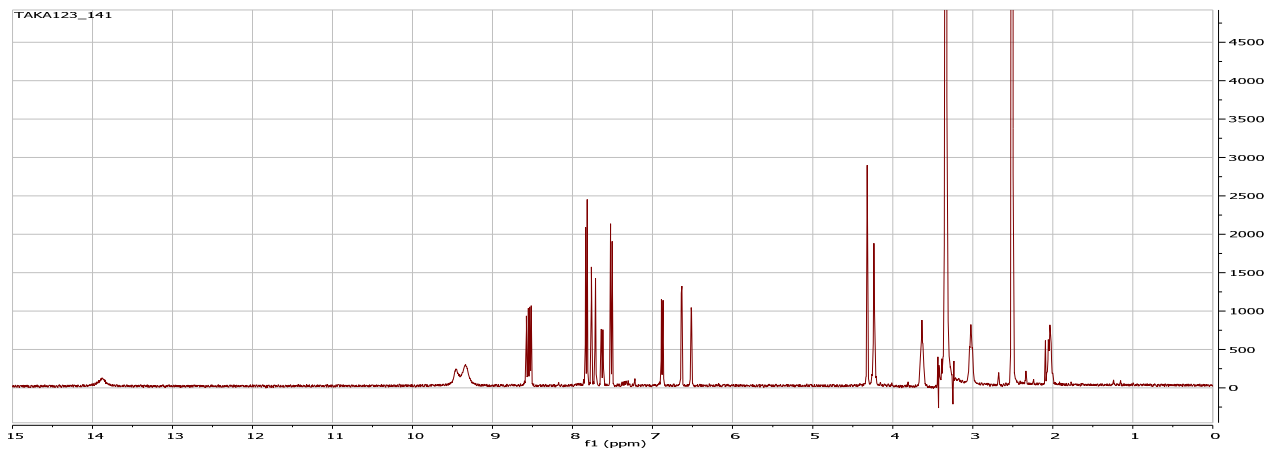

2: UV Detector: TIC

2.634e+2  
Range: 2.634e+2

(2) ELSD Signal

1024.433  
Range: 1024.331

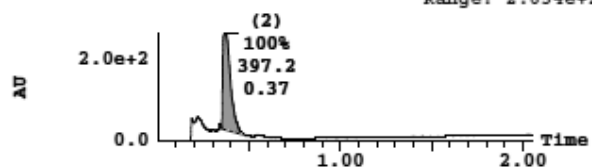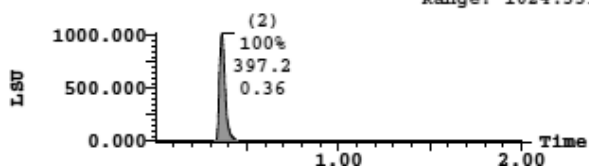

| Peak ID | Compound | Time | Mass Found |
|---------|----------|------|------------|
| 2       | Found    | 0.35 | 397.20     |

1:MS ES+  
9.0e+007

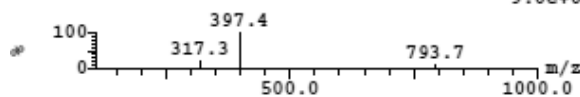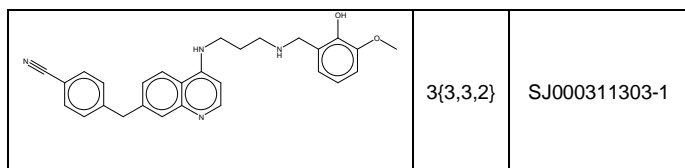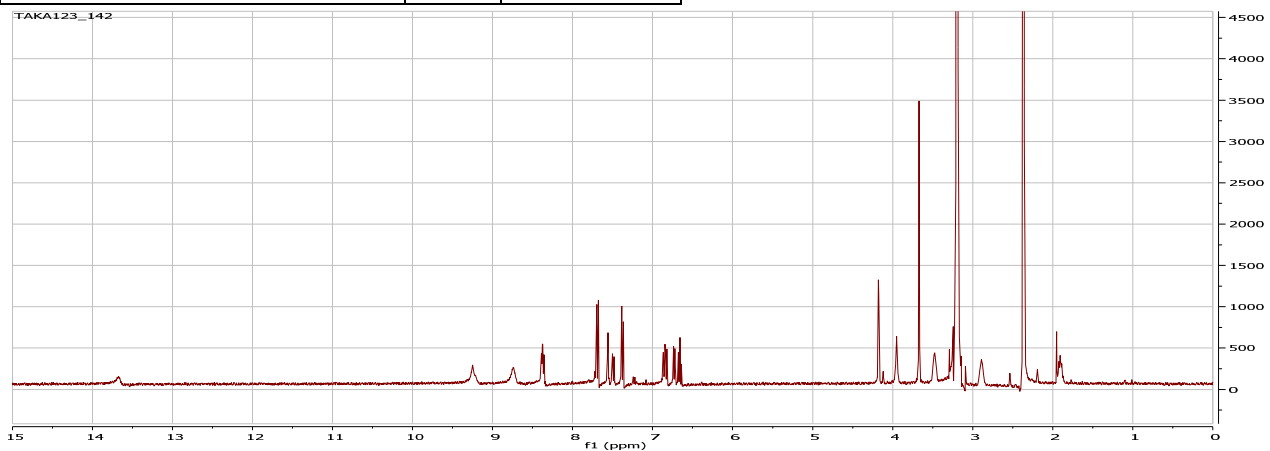

2: UV Detector: TIC

2.829e+2  
Range: 2.829e+2

(2) ELSD Signal

1320.579  
Range: 1320.487

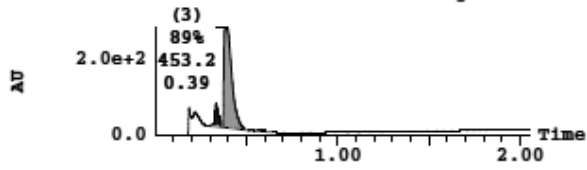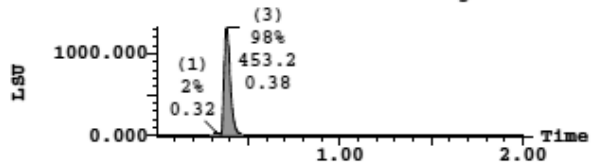

| Peak ID | Compound Found | Time | Mass Found |
|---------|----------------|------|------------|
| 3       | Found          | 0.37 | 453.22     |

1:MS ES+  
8.6e+007

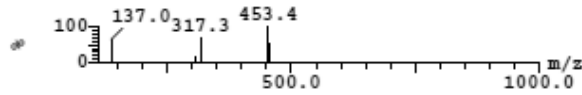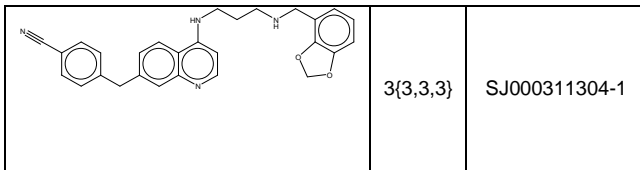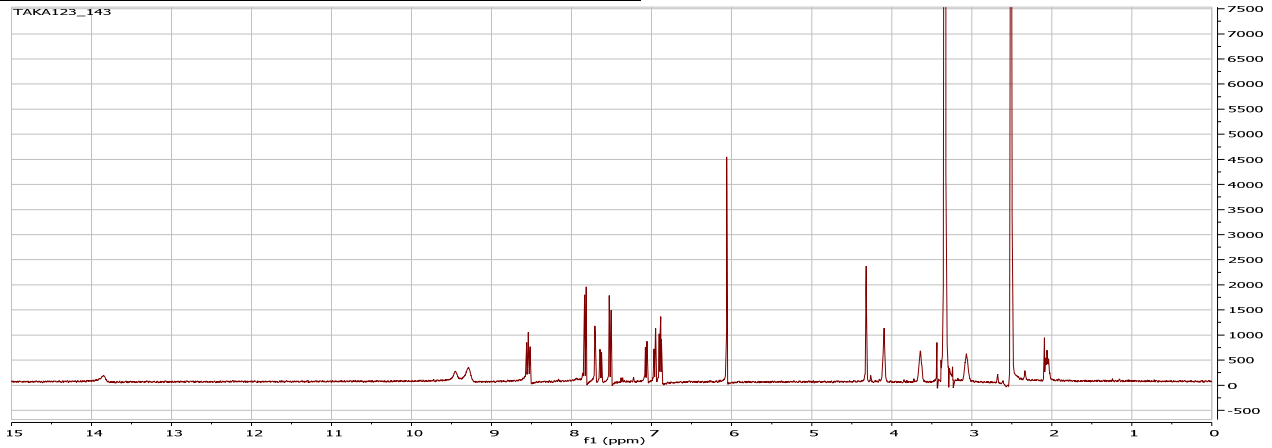

2: UV Detector: TIC

2.779e+2  
Range: 2.779e+2

(2) ELSD Signal

1173.306  
Range: 1173.271

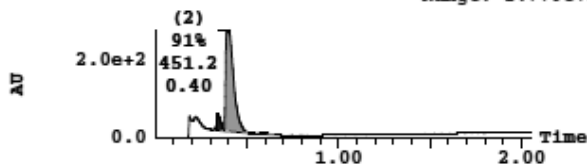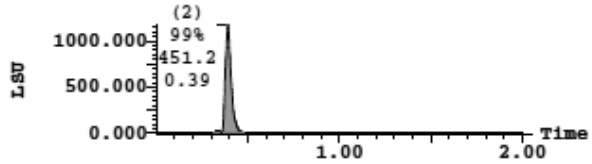

| Peak ID | Compound Found | Time | Mass Found |
|---------|----------------|------|------------|
| 2       | Found          | 0.38 | 451.21     |

1:MS ES+  
9.0e+007

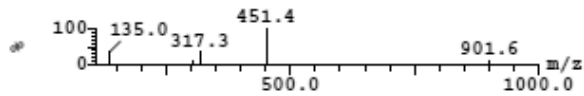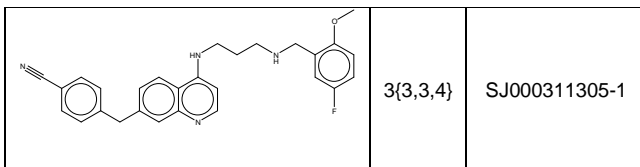

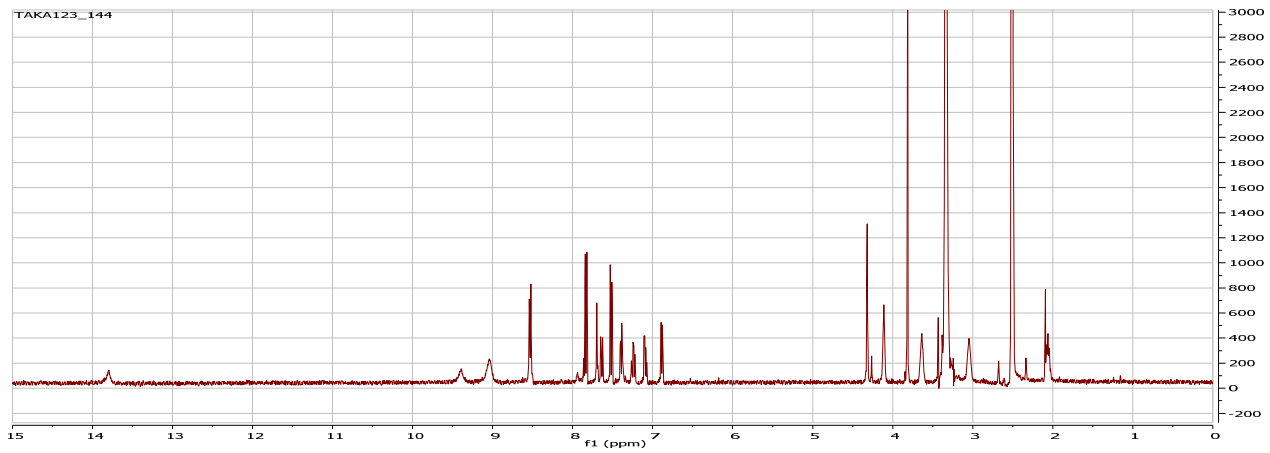

2: UV Detector: TIC

2.713e+2  
Range: 2.713e+2

(2) ELSD Signal

1053.533  
Range: 1053.428

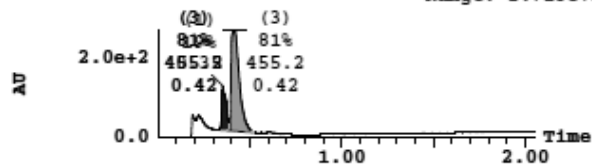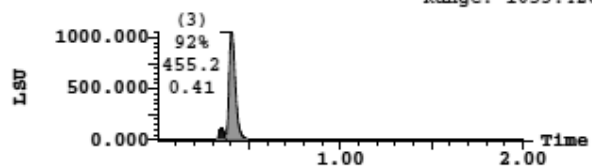

| Peak ID | Compound | Time | Mass Found |
|---------|----------|------|------------|
| 3       | Found    | 0.39 | 455.22     |

1:MS ES+  
8.2e+007

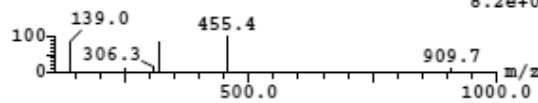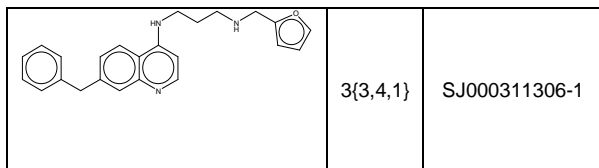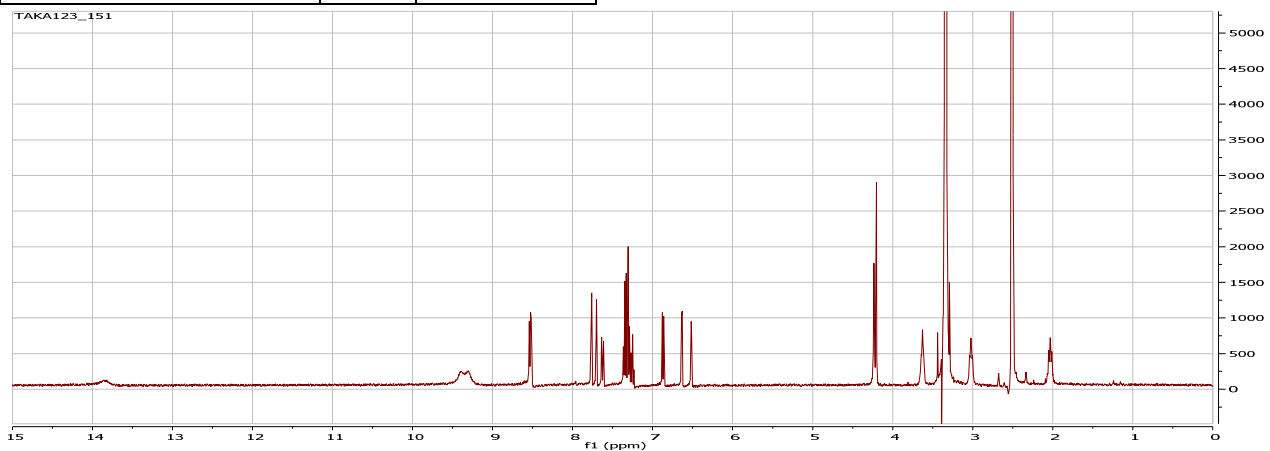



2: UV Detector: TIC

2.562e+2  
Range: 2.562e+2

(2) ELSD Signal

923.104  
Range: 923.030

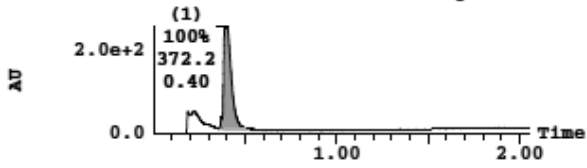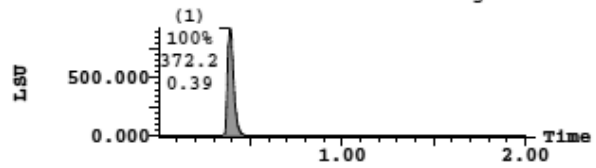

| Peak ID | Compound Found | Time | Mass Found |
|---------|----------------|------|------------|
| 1       | Found          | 0.38 | 372.20     |

1:MS ES+  
9.0e+007

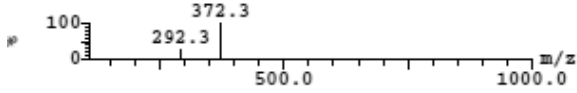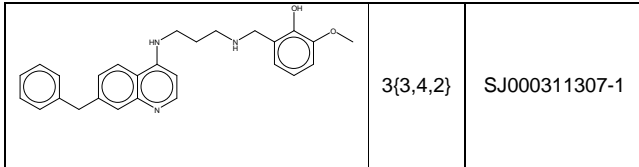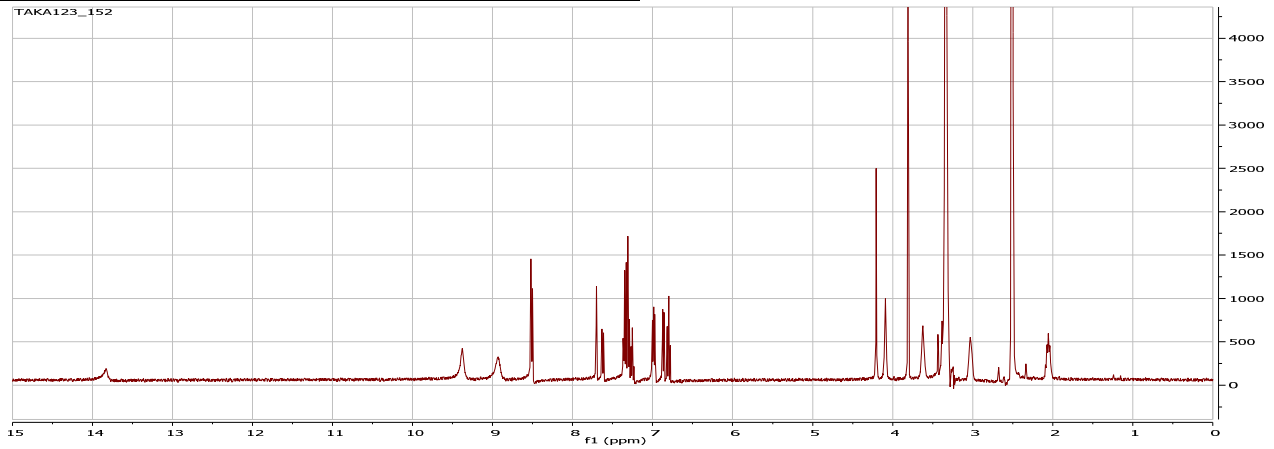

2: UV Detector: TIC

2.804e+2  
Range: 2.804e+2

(2) ELSD Signal

1344.506  
Range: 1344.493

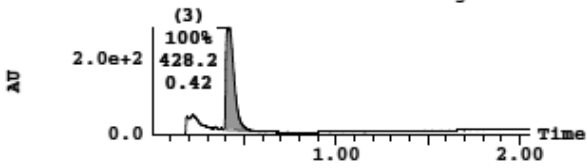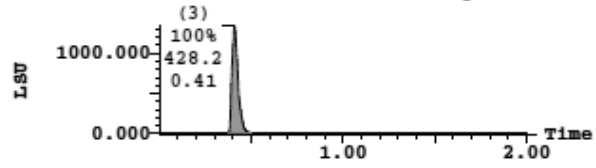

| Peak ID | Compound Found | Time | Mass Found |
|---------|----------------|------|------------|
| 3       | Found          | 0.40 | 428.23     |

1:MS ES+  
8.7e+007

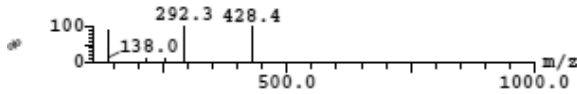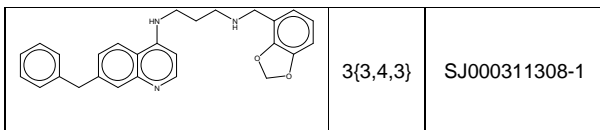

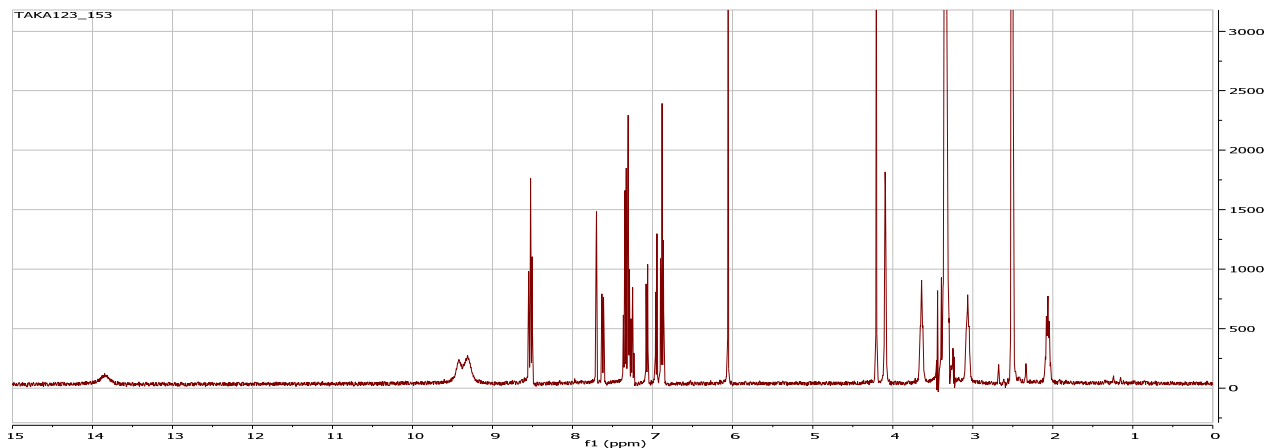

2: UV Detector: TIC

2.838e+2  
Range: 2.837e+2

(2) ELSD Signal

1227.290  
Range: 1227.266

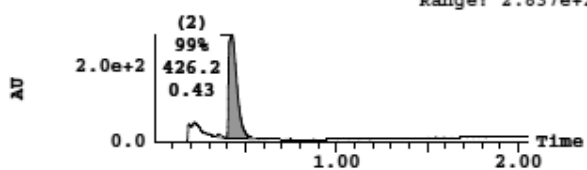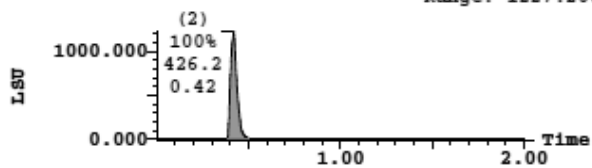

| Peak ID | Compound | Time | Mass Found |
|---------|----------|------|------------|
| 2       | Found    | 0.41 | 426.21     |

1:MS ES+  
9.6e+007

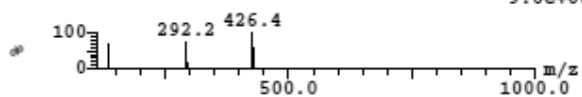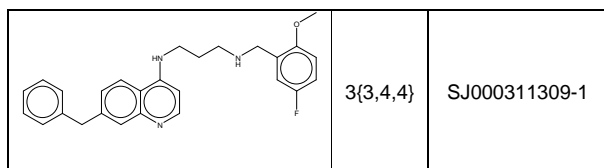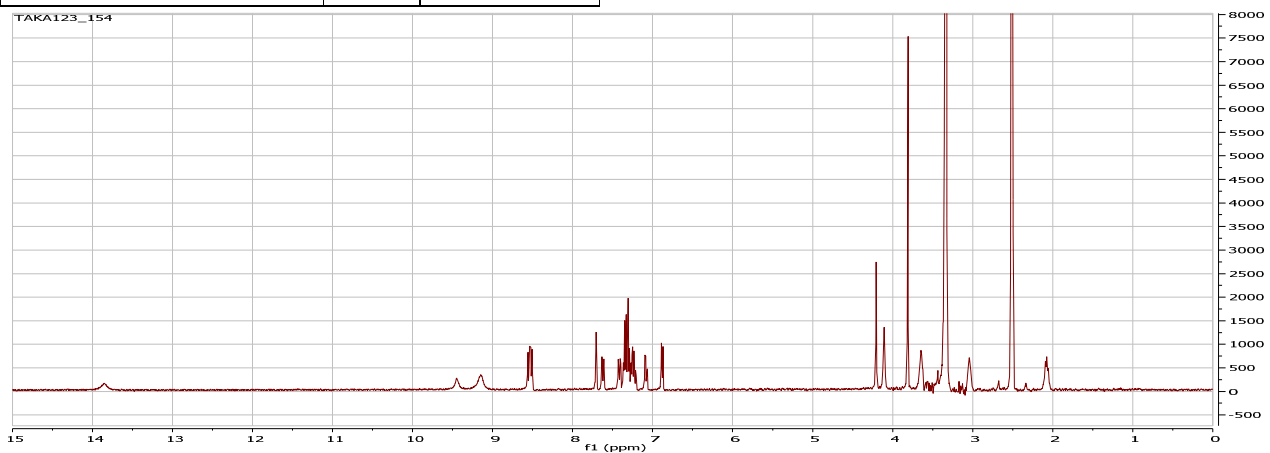

2: UV Detector: TIC

2.871e+2 (2) ELSD signal  
Range: 2.871e+2

1421.634  
Range: 1421.478

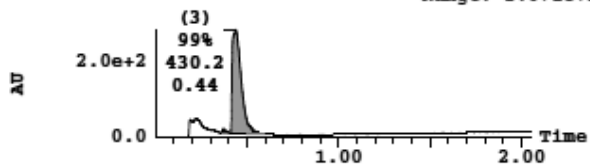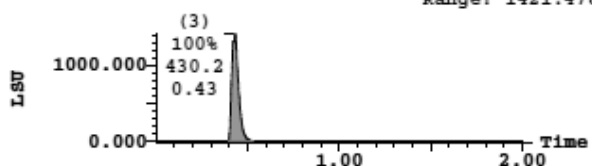

| Peak ID | Compound | Time | Mass Found |
|---------|----------|------|------------|
| 3       | Found    | 0.42 | 430.22     |

1:MS ES+  
9.1e+007

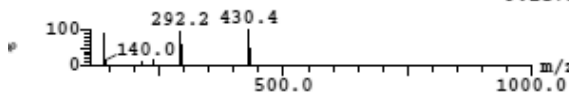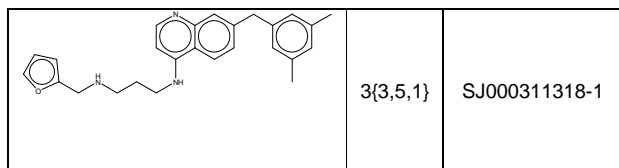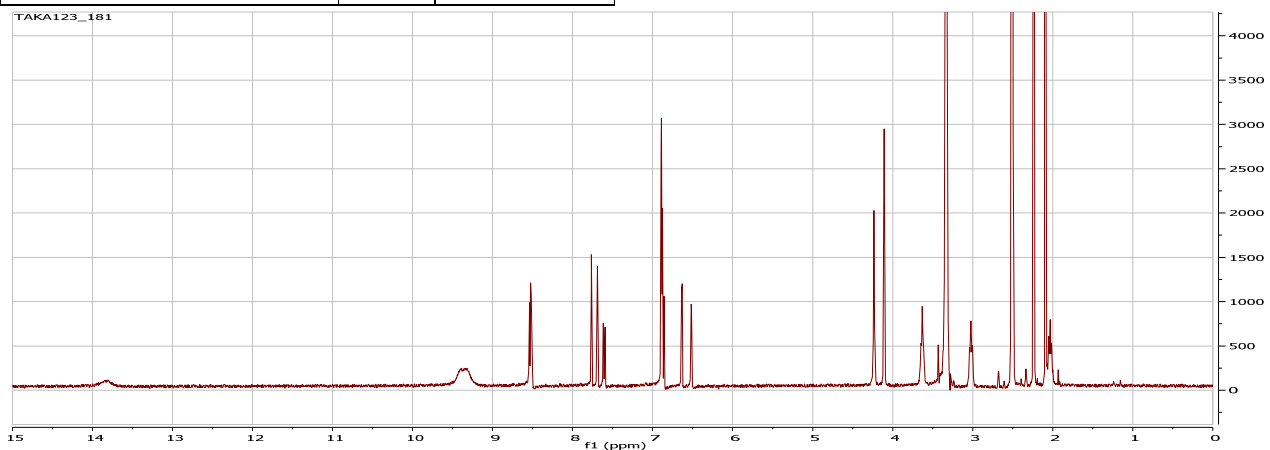

2: UV Detector: TIC

2.519e+2 (2) ELSD signal  
Range: 2.519e+2

984.691  
Range: 984.534

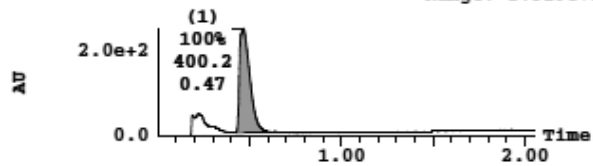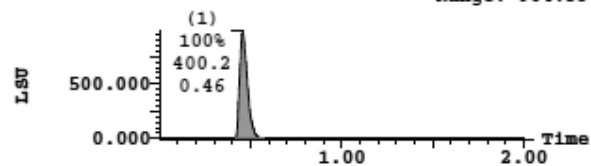

| Peak ID | Compound | Time | Mass Found |
|---------|----------|------|------------|
| 1       | Found    | 0.44 | 400.23     |

1:MS ES+  
8.9e+007

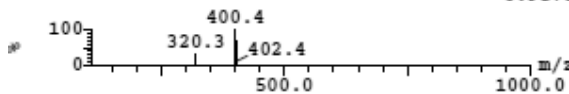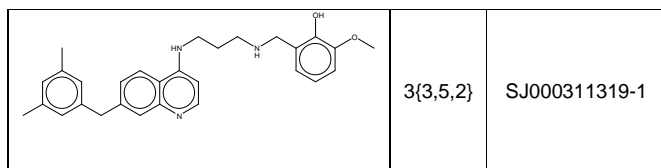

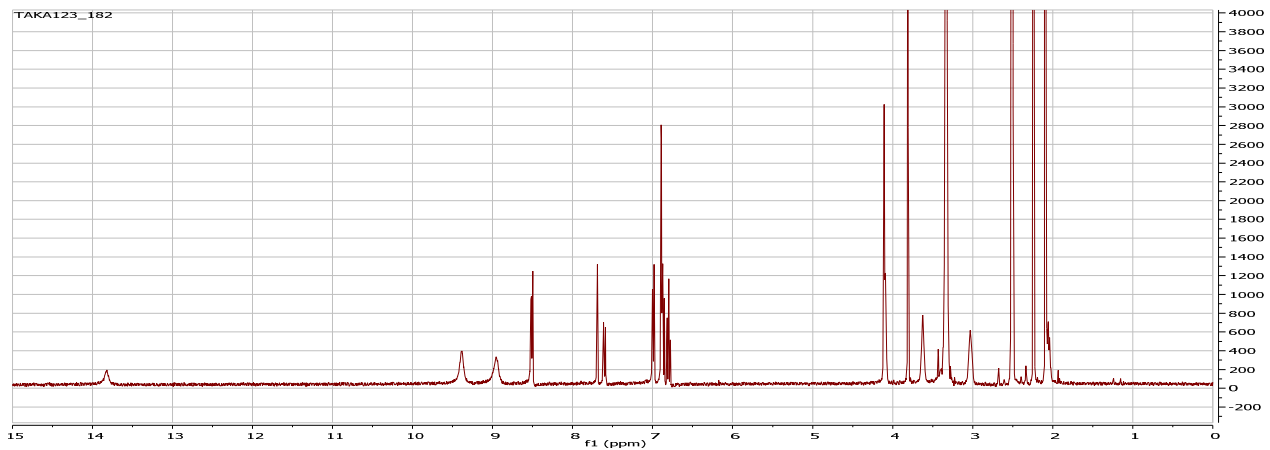

2: UV Detector: TIC

2.775e+2 (2) ELSD Signal  
Range: 2.775e+2

1387.543  
Range: 1387.529

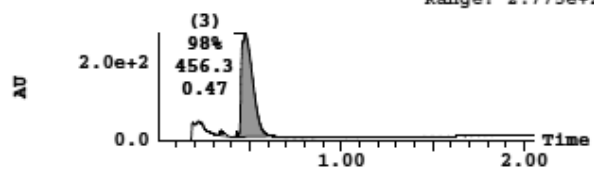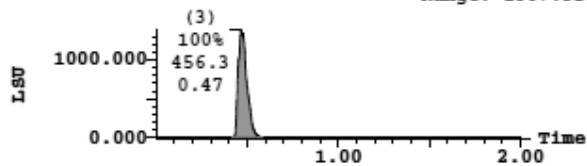

| Peak ID | Compound | Time | Mass Found |
|---------|----------|------|------------|
| 3       | Found    | 0.48 | 456.28     |

1: MS ES+  
9.8e+007

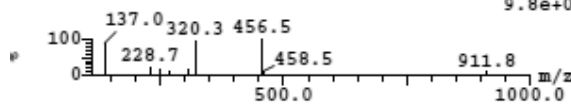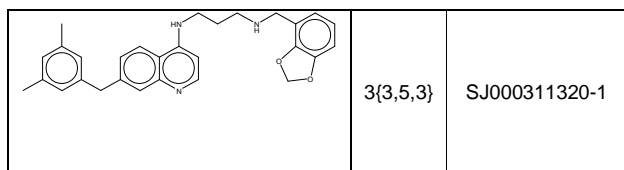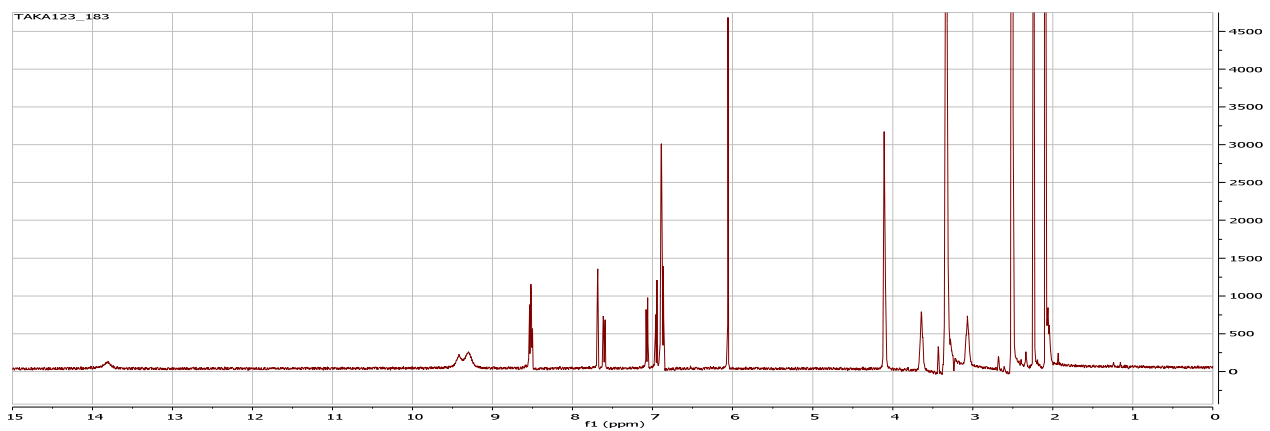

2: UV Detector: TIC

2.436e+2  
Range: 2.436e+2

(2) ELSD signal

951.739  
Range: 951.701

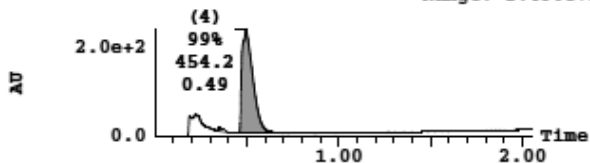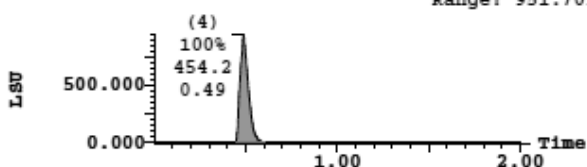

| Peak ID | Compound | Time | Mass Found |
|---------|----------|------|------------|
| 4       | Found    | 0.47 | 454.24     |

1:MS ES+  
1.0e+008

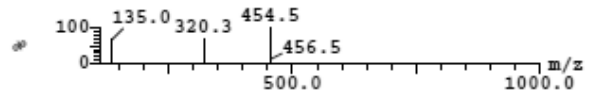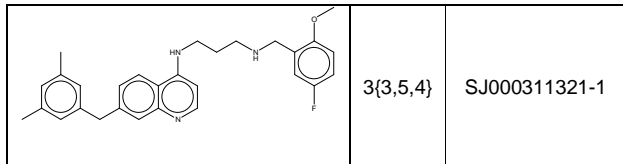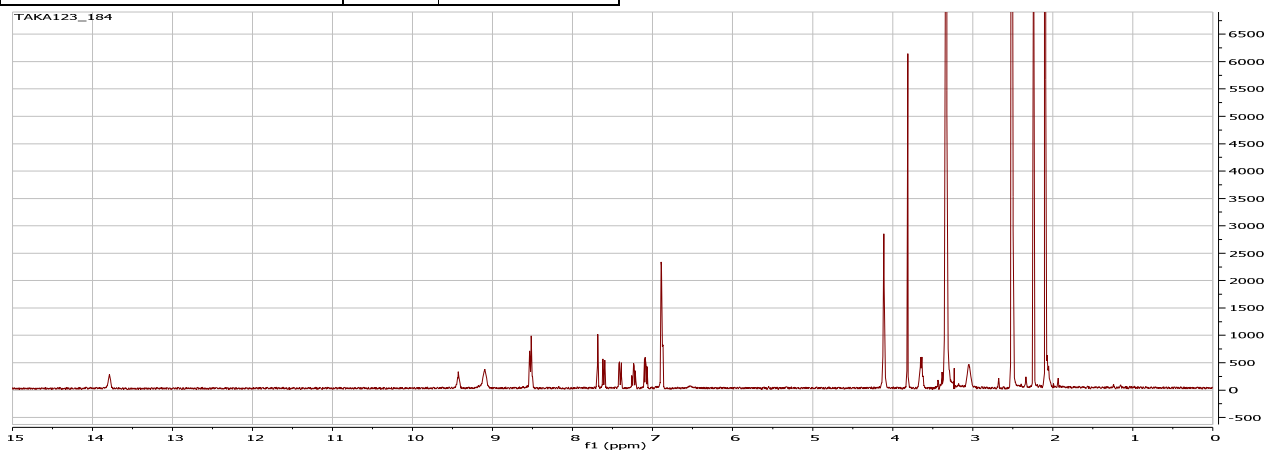

2: UV Detector: TIC

2.657e+2  
Range: 2.657e+2

(2) ELSD signal

1132.513  
Range: 1132.366

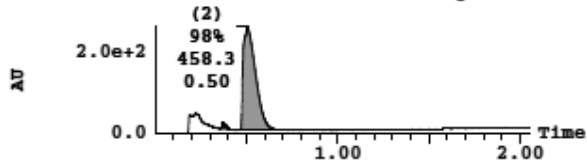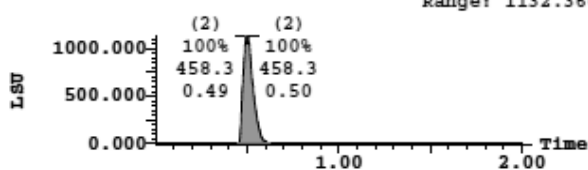

| Peak ID | Compound | Time | Mass Found |
|---------|----------|------|------------|
| 2       | Found    | 0.48 | 458.25     |

1:MS ES+  
1.0e+008

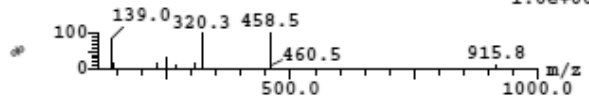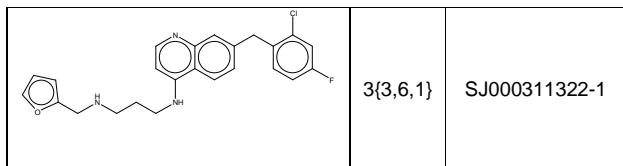

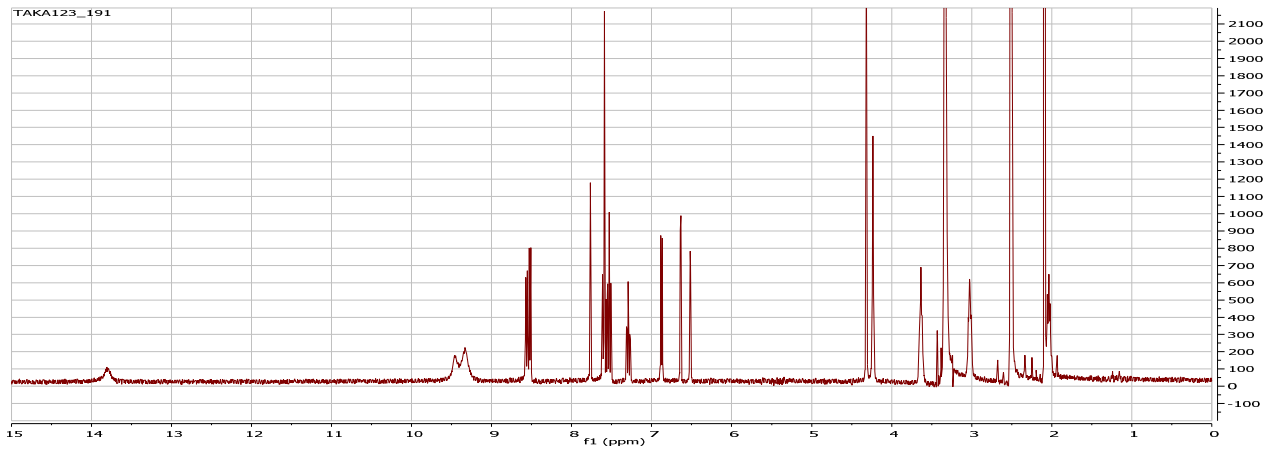

2: UV Detector: TIC

2.47e+2 (2) ELSD Signal

994.057

Range: 2.47e+2

Range: 994.007

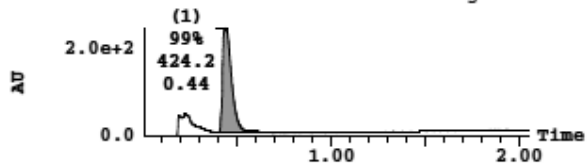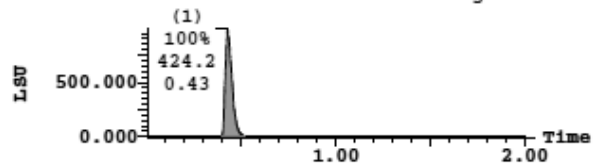

| Peak ID | Compound | Time | Mass Found |
|---------|----------|------|------------|
| 1       | Found    | 0.41 | 424.15     |

1:MS ES+  
8.9e+007

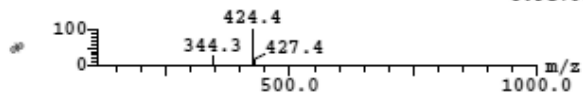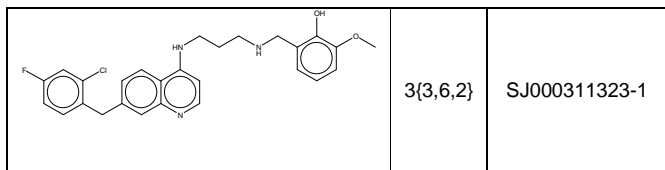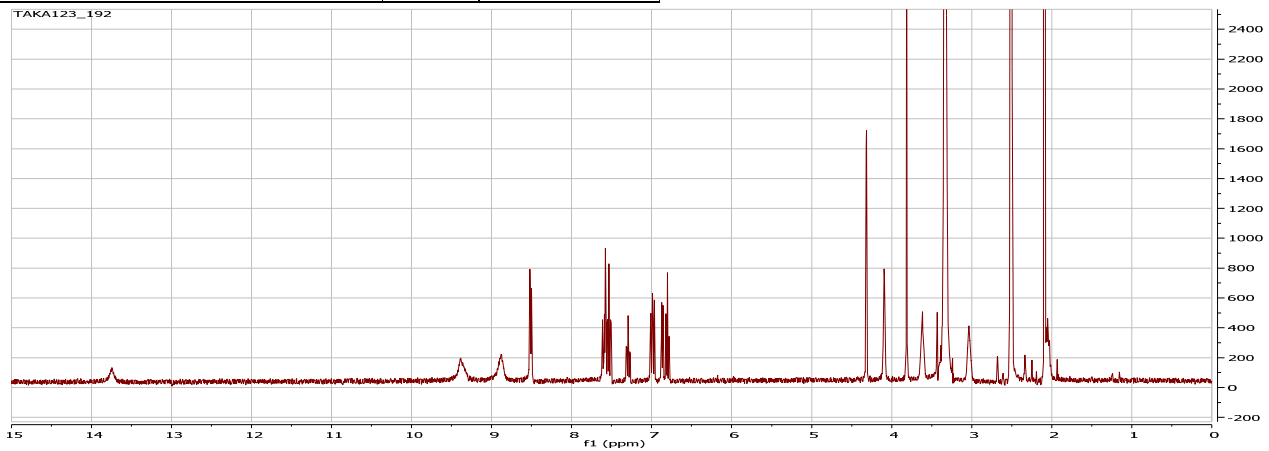

2: UV Detector: TIC

2.687e+2  
Range: 2.687e+2

(2) ELSD Signal

1343.382  
Range: 1343.073

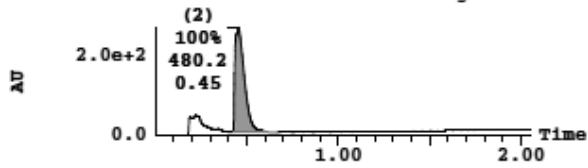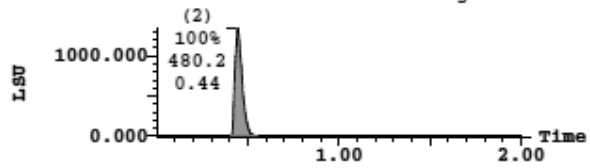

| Peak ID | Compound | Time | Mass Found |
|---------|----------|------|------------|
| 2       | Found    | 0.44 | 480.18     |

1:MS ES+  
9.2e+007

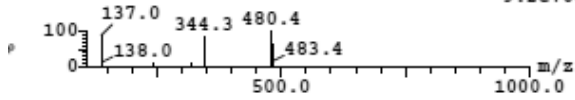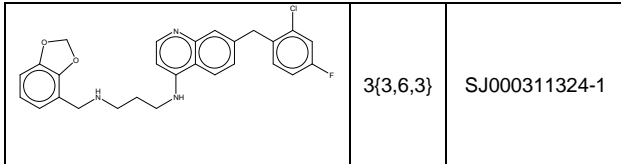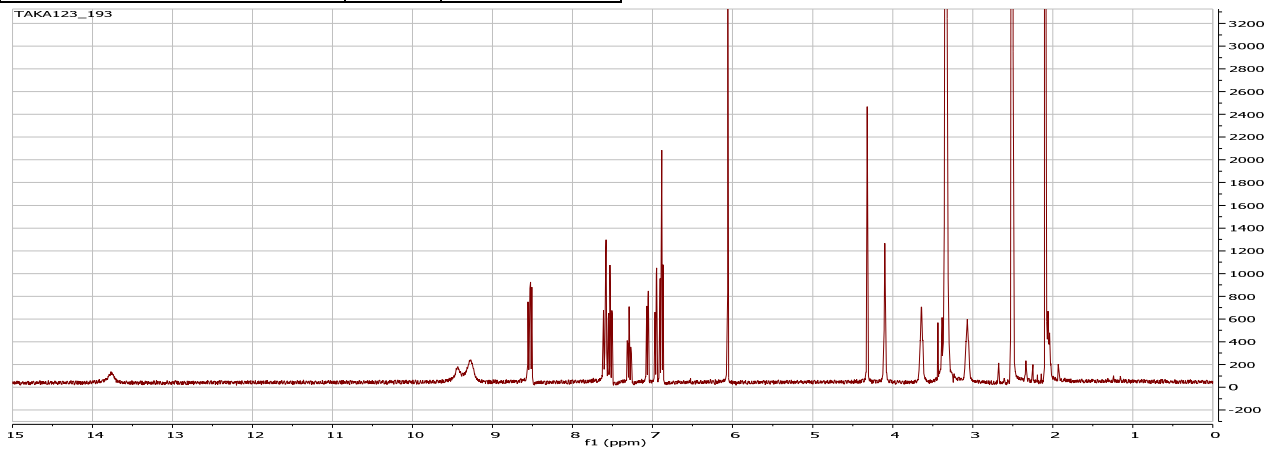

2: UV Detector: TIC

2.66e+2  
Range: 2.66e+2

(2) ELSD Signal

1140.233  
Range: 1140.187

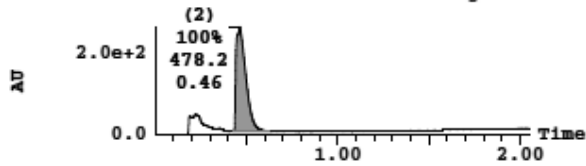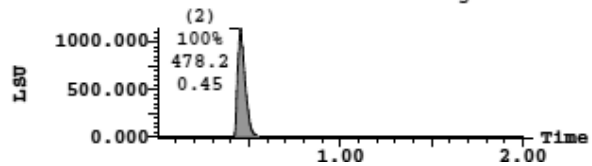

| Peak ID | Compound | Time | Mass Found |
|---------|----------|------|------------|
| 2       | Found    | 0.44 | 478.16     |

1:MS ES+  
1.0e+008

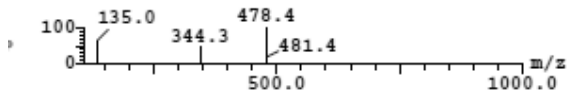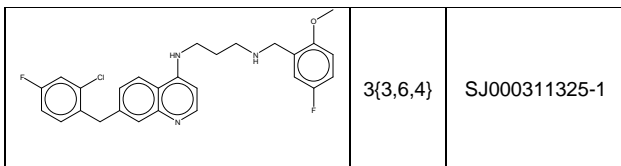

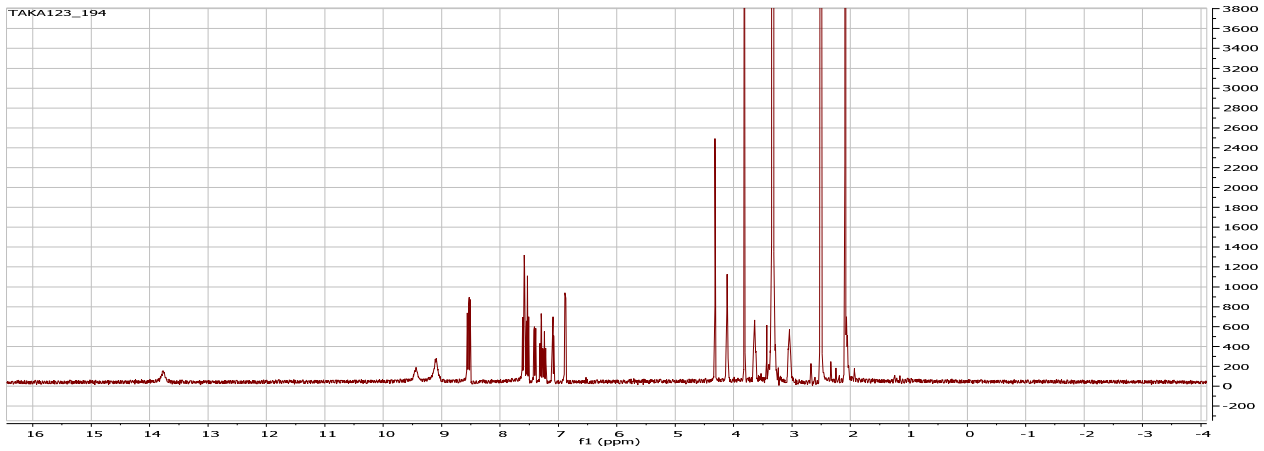

2: UV Detector: TIC

2.505e+2  
Range: 2.505e+2

(2) ELSD Signal

1018.996  
Range: 1018.945

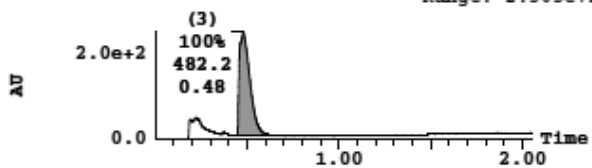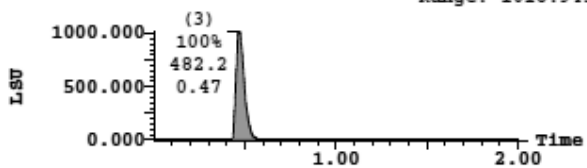

| Peak ID | Compound | Time | Mass Found |
|---------|----------|------|------------|
| 3       | Found    | 0.48 | 482.17     |

1:MS ES+  
9.6e+007

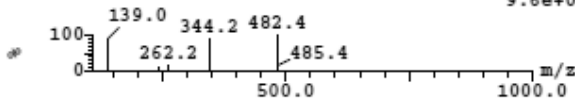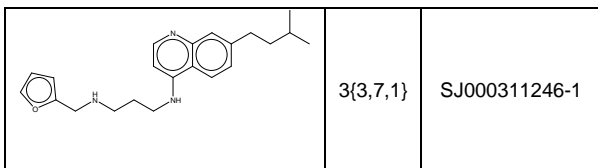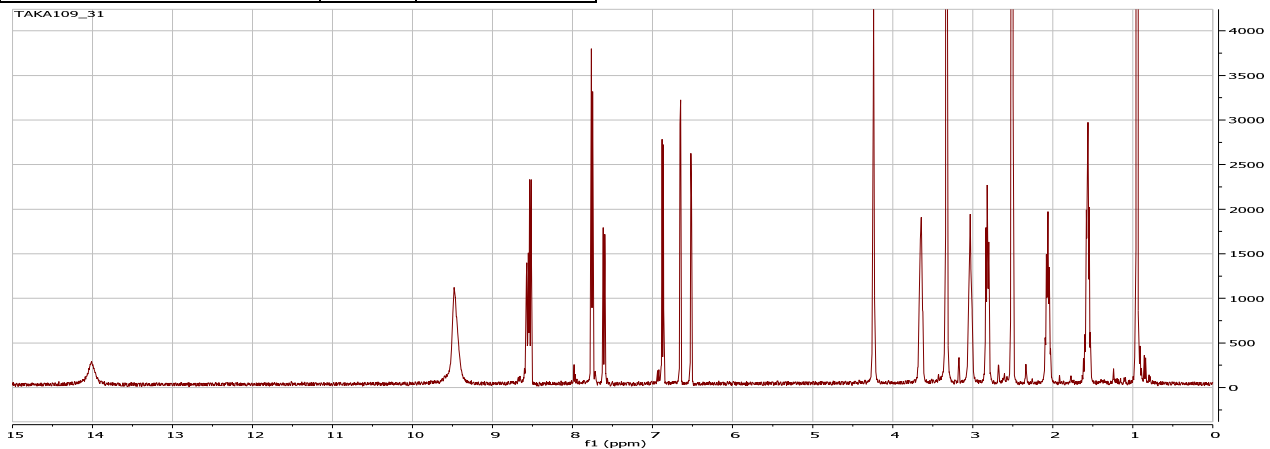



2: UV Detector: TIC

2.073e+2  
Range: 2.073e+2

(2) ELSD Signal

429.915  
Range: 429.760

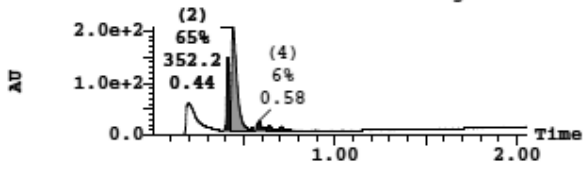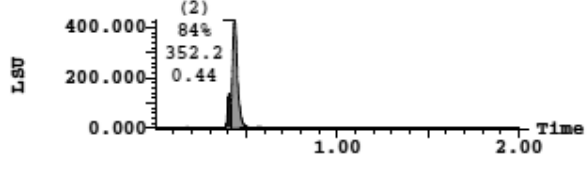

| Peak ID | Compound | Time | Mass Found |
|---------|----------|------|------------|
| 2       | Found    | 0.42 | 352.23     |

1:MS ES+  
7.3e+007

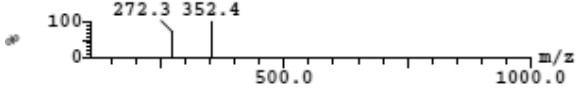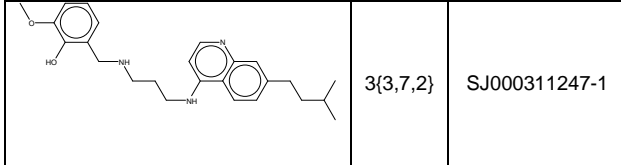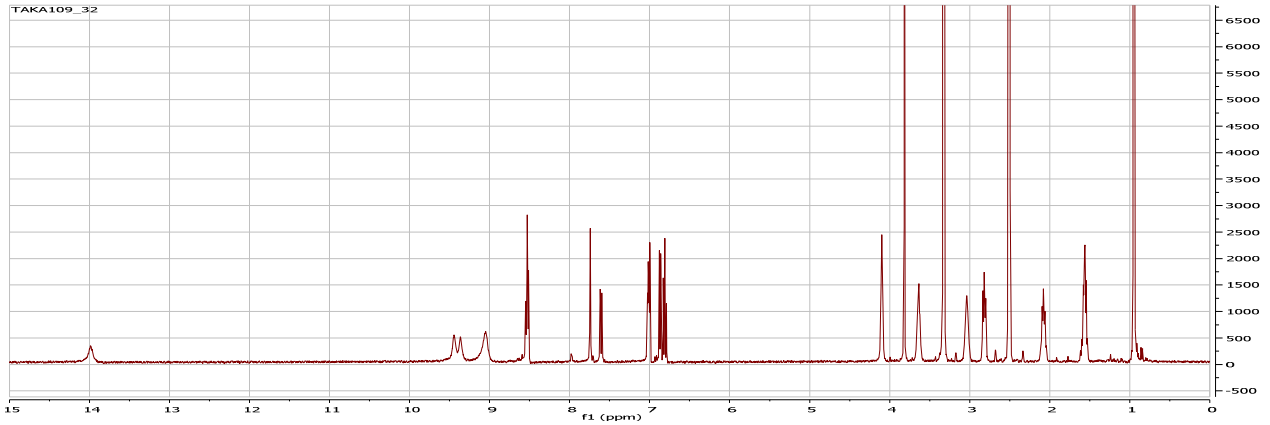

2: UV Detector: TIC

2.432e+2  
Range: 2.432e+2

(2) ELSD Signal

765.502  
Range: 765.464

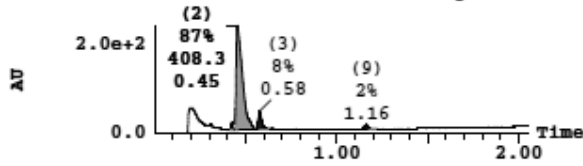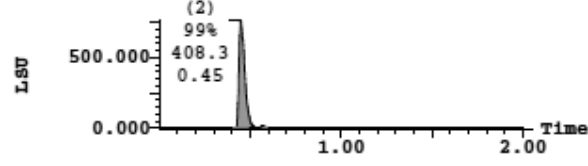

| Peak ID | Compound | Time | Mass Found |
|---------|----------|------|------------|
| 2       | Found    | 0.44 | 408.26     |

1:MS ES+  
8.0e+007

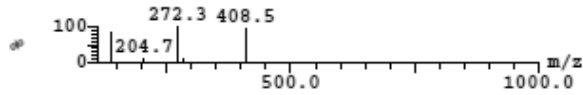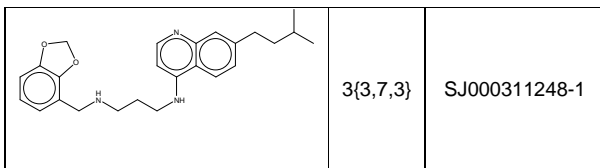

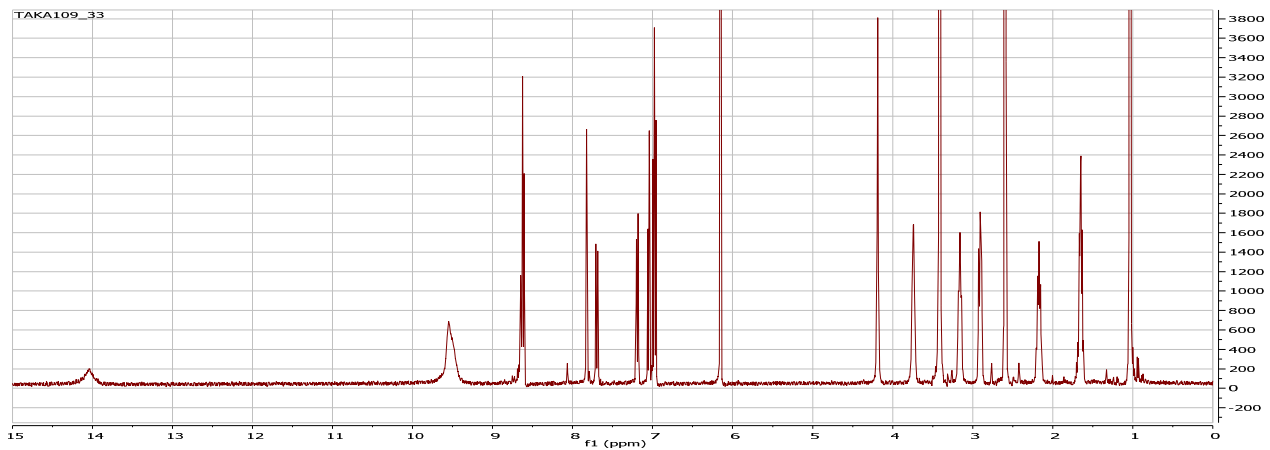

2: UV Detector: TIC 2.982e+2 (2) ELSD signal 1651.719  
 Range: 2.982e+2 Range: 1651.488

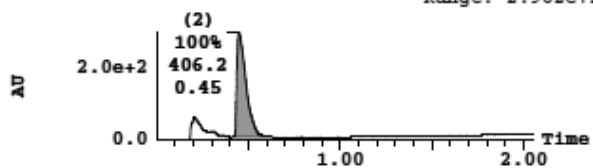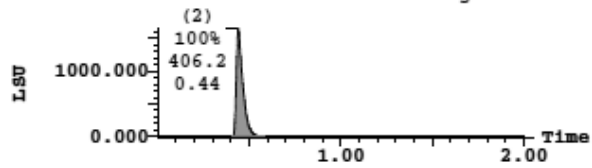

| Peak ID | Compound | Time | Mass Found |
|---------|----------|------|------------|
| 2       | Found    | 0.44 | 406.24     |

1:MS ES+  
9.0e+007

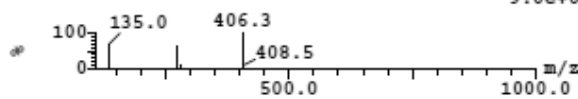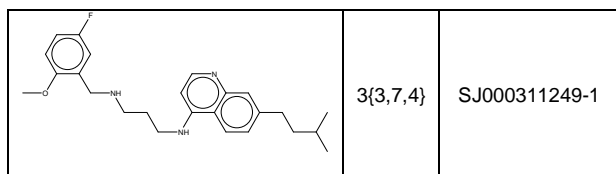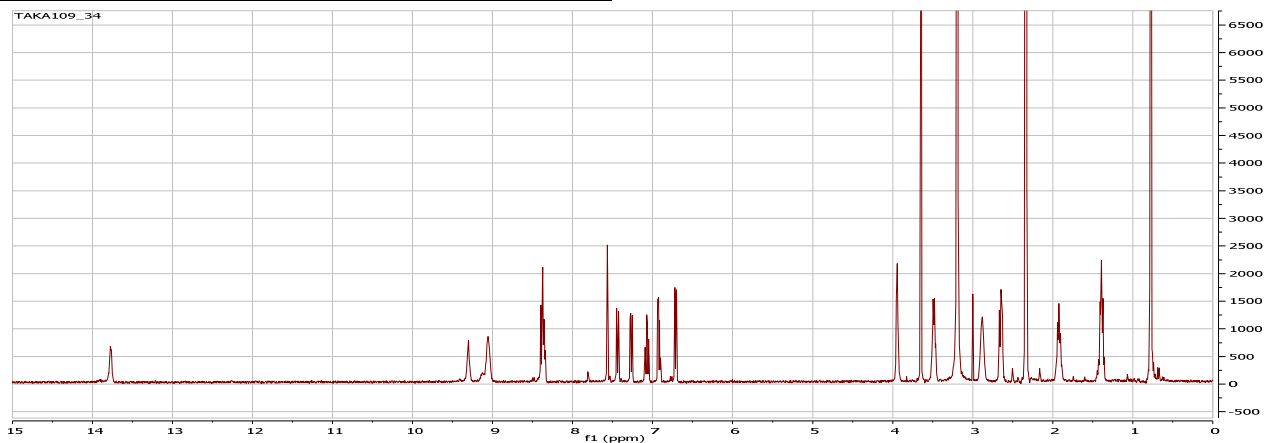

2: UV Detector: TIC 2.324e+2  
Range: 2.324e+2

(2) ELSD Signal 720.869  
Range: 720.826

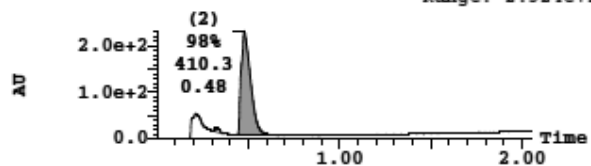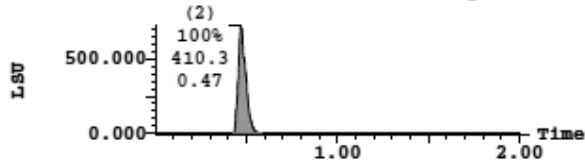

| Peak ID | Compound | Time | Mass Found |
|---------|----------|------|------------|
| 2       | Found    | 0.48 | 410.25     |

1:MS ES+  
9.9e+007

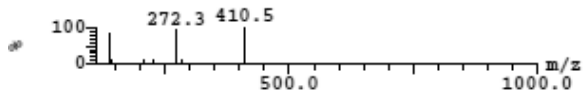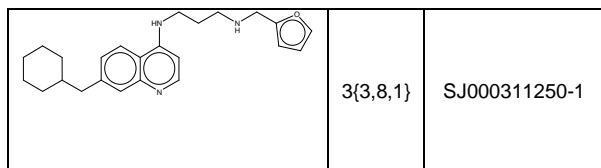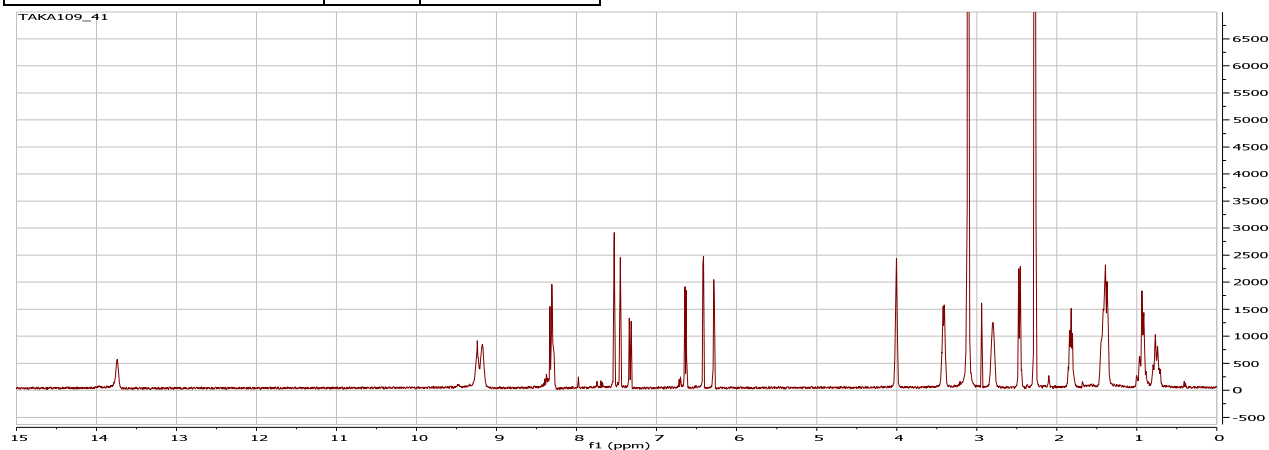

2: UV Detector: TIC 2.341e+2  
Range: 2.341e+2

(2) ELSD Signal 761.950  
Range: 761.920

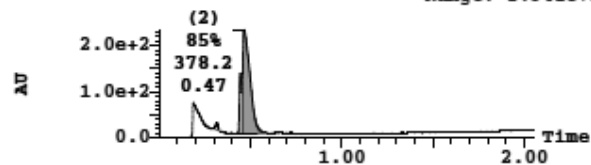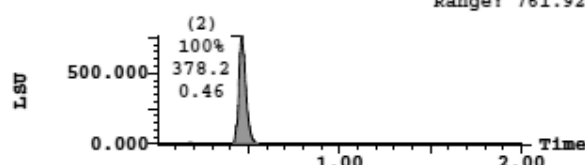

| Peak ID | Compound | Time | Mass Found |
|---------|----------|------|------------|
| 2       | Found    | 0.44 | 378.25     |

1:MS ES+  
7.6e+007

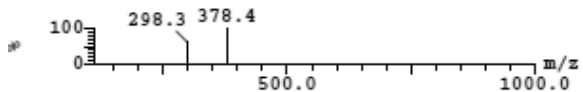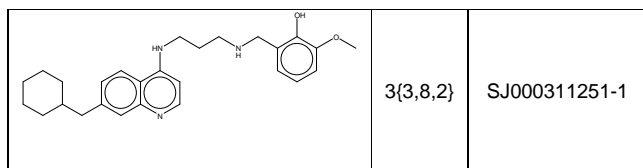

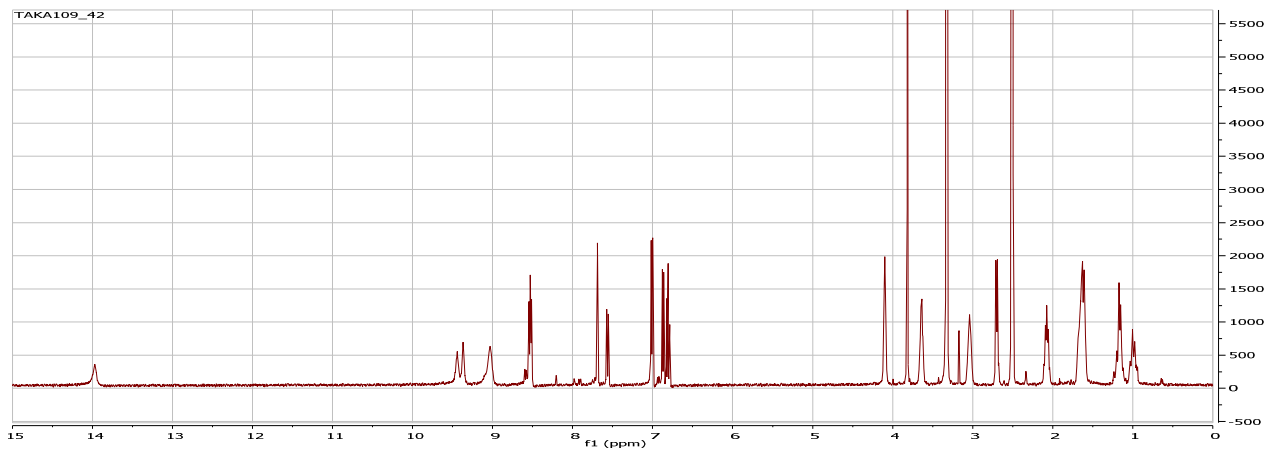

2: UV Detector: TIC 2.213e+2 (2) ELSD Signal 746.412  
 Range: 2.213e+2 Range: 746.382

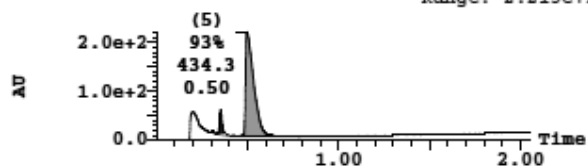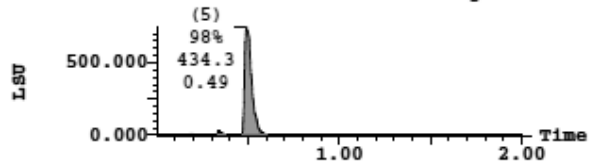

| Peak ID | Compound | Time | Mass Found |
|---------|----------|------|------------|
| 5       | Found    | 0.48 | 434.27     |

1:MS ES+  
8.0e+007

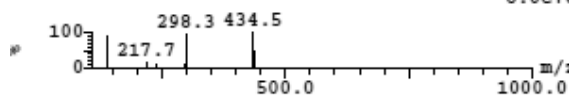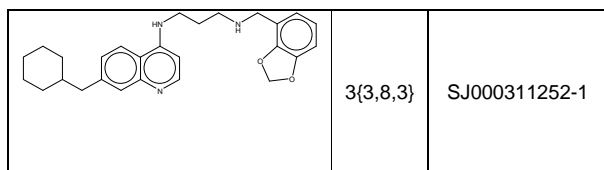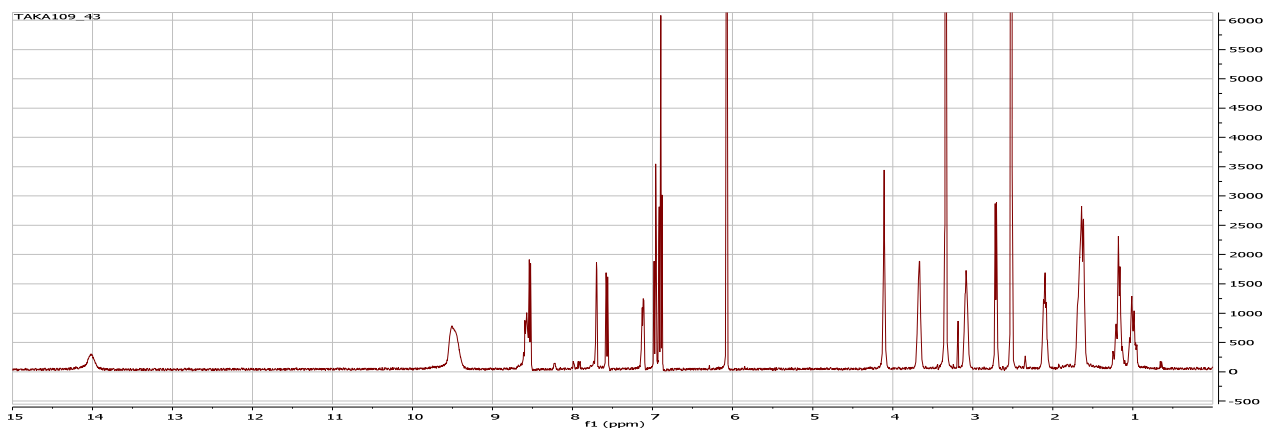

2: UV Detector: TIC

2.479e+2 (2) ELSD Signal  
Range: 2.479e+2

965.782  
Range: 965.695

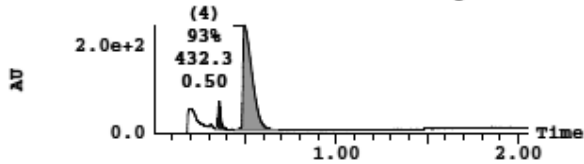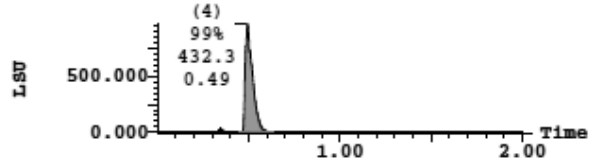

| Peak ID | Compound | Time | Mass Found |
|---------|----------|------|------------|
| 4       | Found    | 0.49 | 432.26     |

1:MS ES+  
9.8e+007

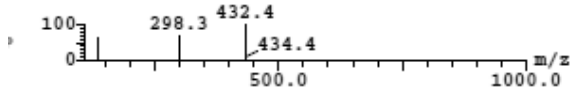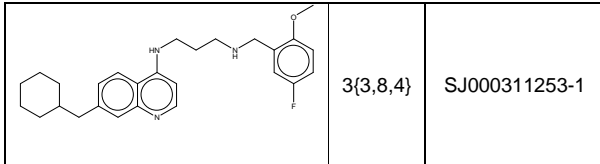

TAKA109\_44

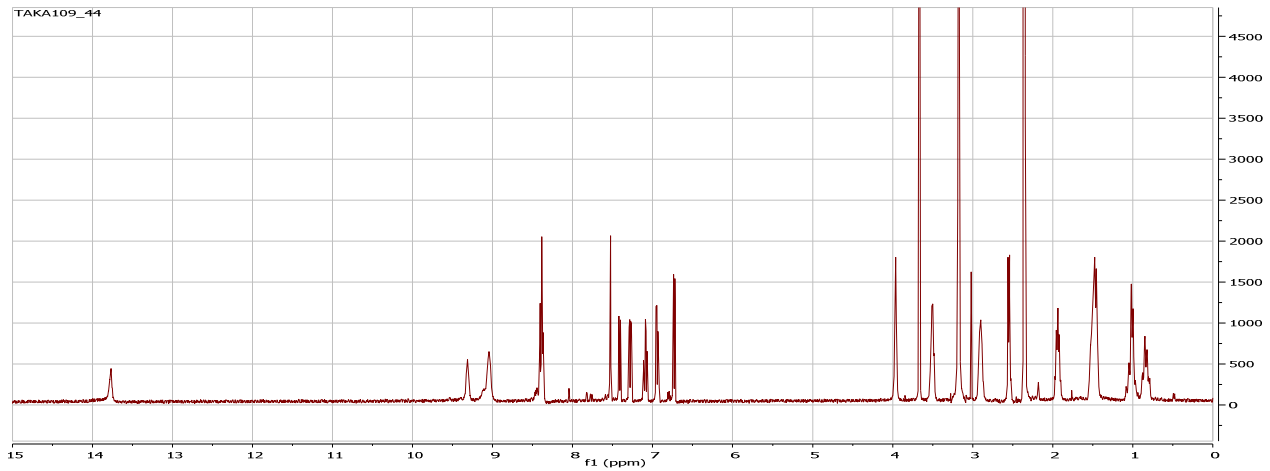

2: UV Detector: TIC

2.106e+2 (2) ELSD Signal  
Range: 2.106e+2

629.029  
Range: 628.928

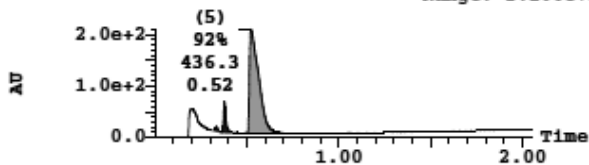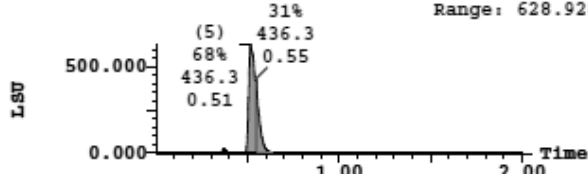

| Peak ID | Compound | Time | Mass Found |
|---------|----------|------|------------|
| 5       | Found    | 0.51 | 436.27     |

1:MS ES+  
8.6e+007

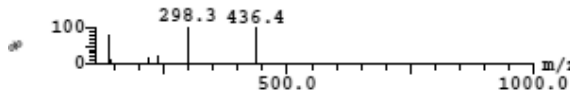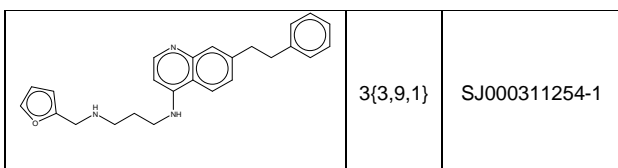

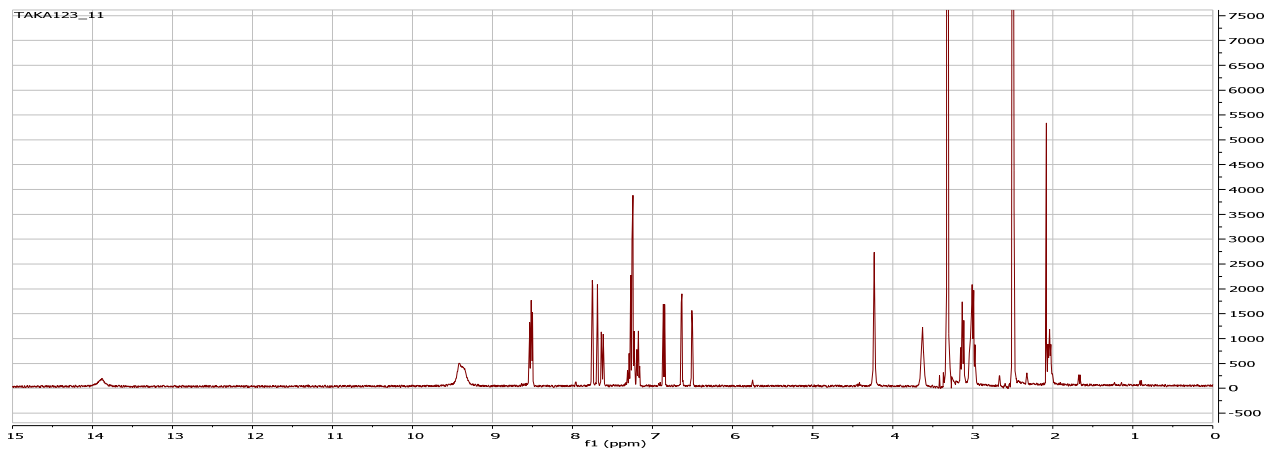

2: UV Detector: TIC 2.327e+2 (2) ELSD signal 676.086  
 Range: 2.327e+2 Range: 676.018

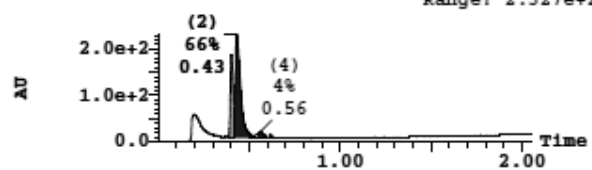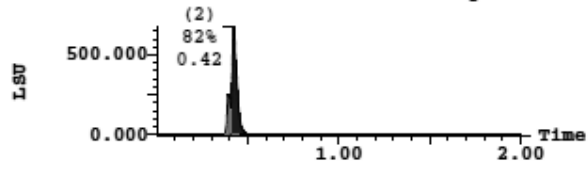

| Peak ID | Compound | Time | Mass Found |
|---------|----------|------|------------|
| 1       | Found    | 0.40 | 386.22     |

1: MS ES+  
6.5e+007

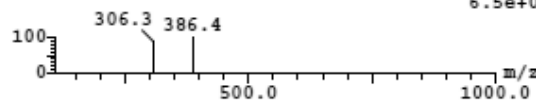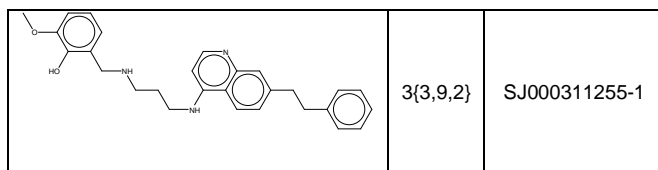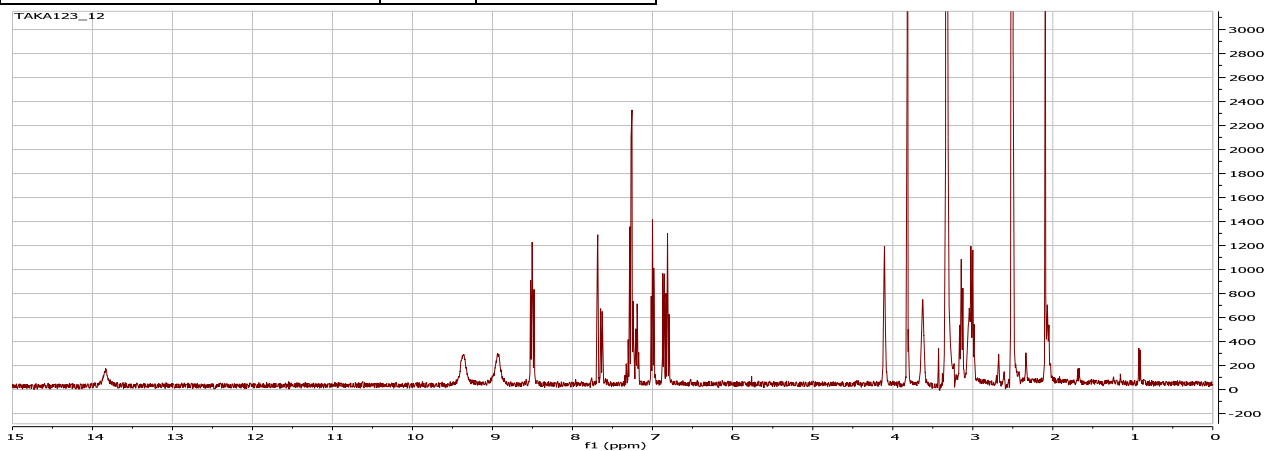

2: UV Detector: TIC

2.734e+2  
Range: 2.733e+2

(2) ELSD Signal

1129.778  
Range: 1129.767

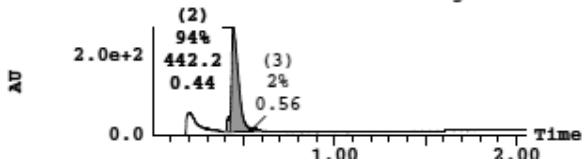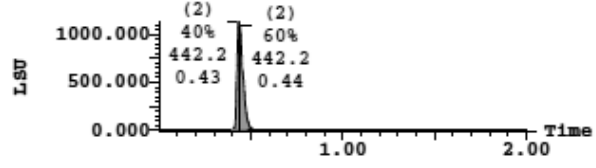

| Peak ID | Compound Found | Time | Mass Found |
|---------|----------------|------|------------|
| 2       | Found          | 0.43 | 442.24     |

1:MS ES+  
8.7e+007

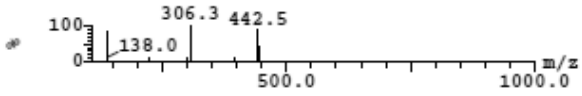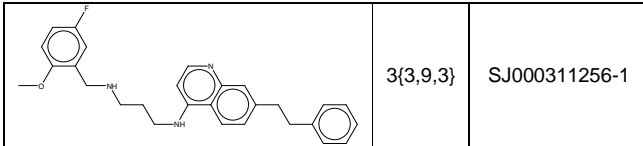

TAKA123\_13

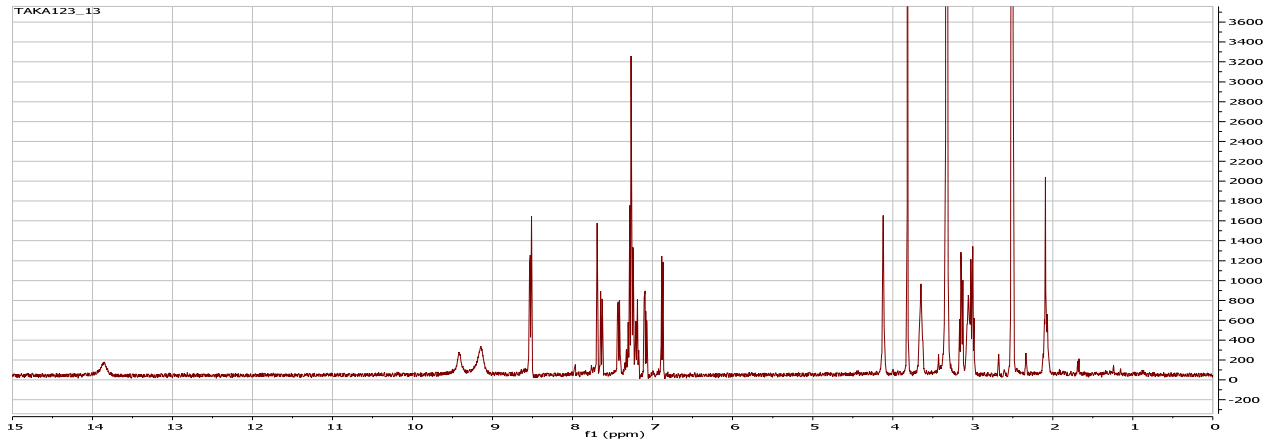

2: UV Detector: TIC

2.8e+2  
Range: 2.8e+2

(2) ELSD Signal (1)

1260.844  
Range: 1260.755

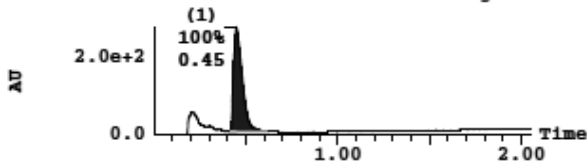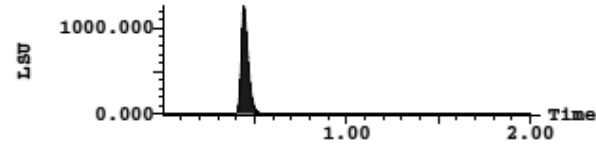

| Peak ID | Compound Found | Time | Mass Found |
|---------|----------------|------|------------|
| 1       | Found          | 0.44 | 440.4      |

1:MS ES+  
1.0e+008

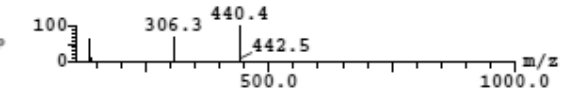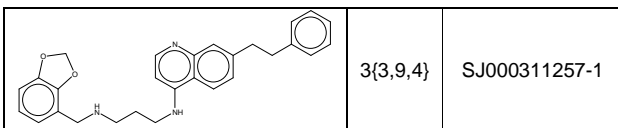

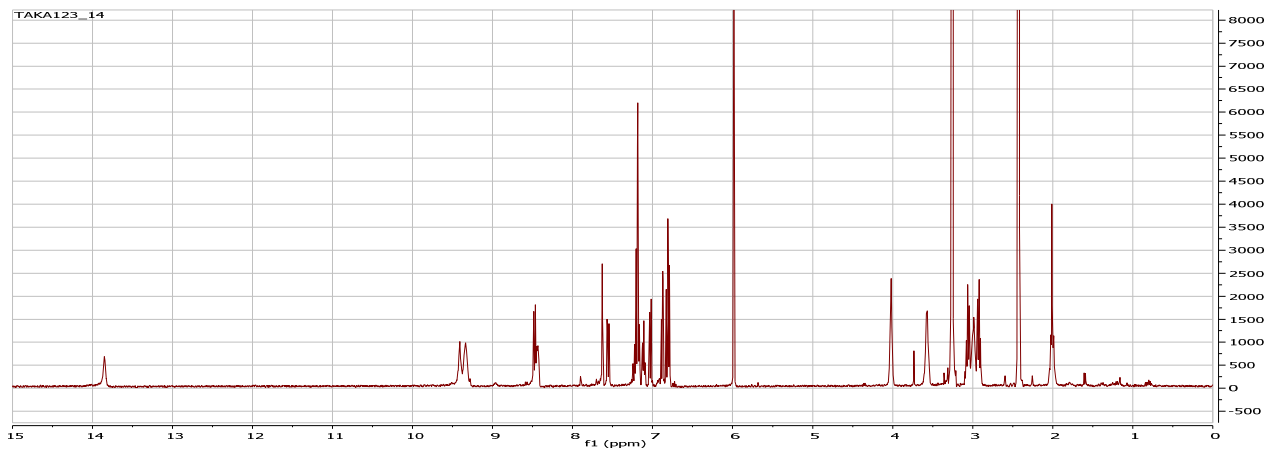

2: UV Detector: TIC 2.294e+2 (2) ELSD Signal (3) 800.374  
 Range: 2.293e+2 100% Range: 800.246  
0.47 0.46

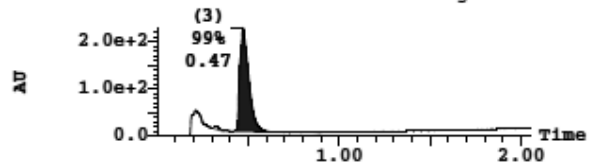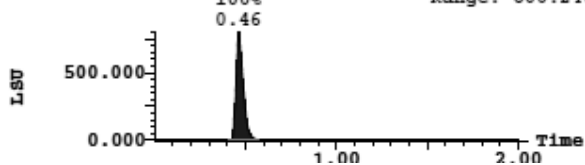

| Peak ID | Compound | Time | Mass Found |
|---------|----------|------|------------|
| 3       |          | 0.45 |            |

1:MS ES+  
9.0e+007

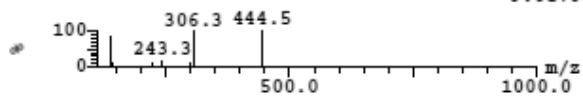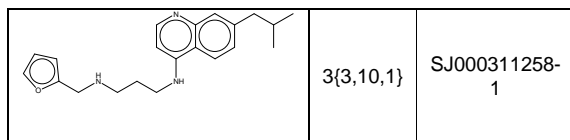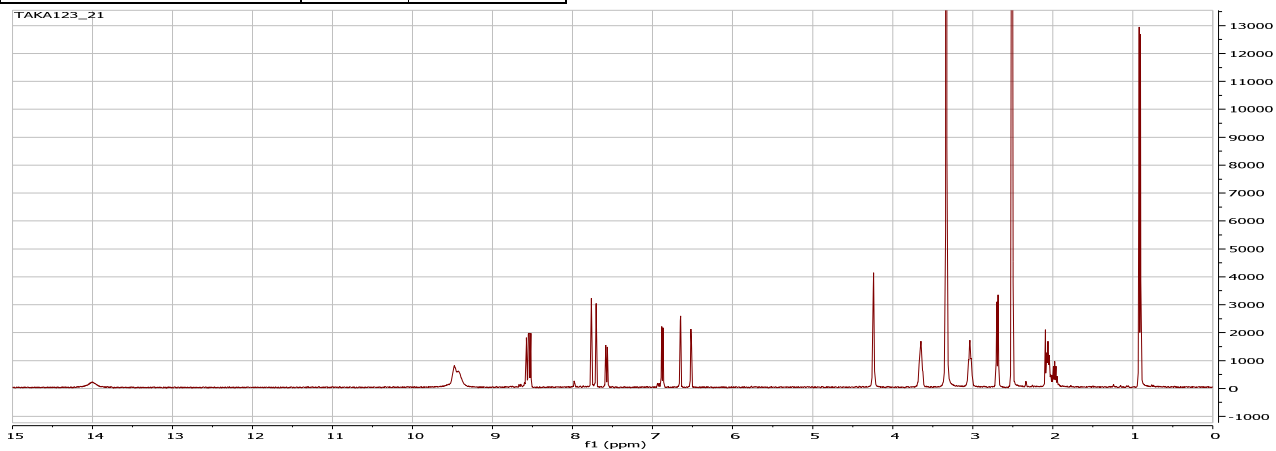



2: UV Detector: TIC

2.435e+2 (2) ELSD Signal

676.609

Range: 2.435e+2

Range: 676.514

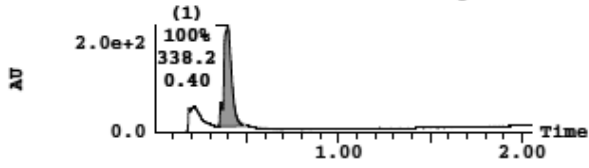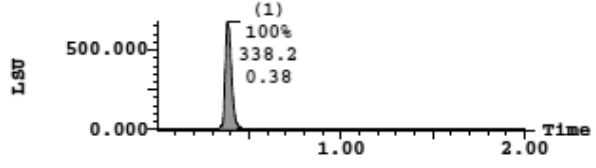

| Peak ID | Compound | Time | Mass Found |
|---------|----------|------|------------|
| 1       | Found    | 0.37 | 338.22     |

1:MS ES+  
8.6e+007

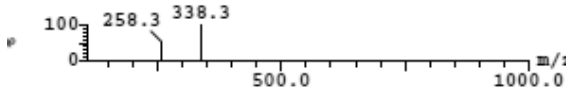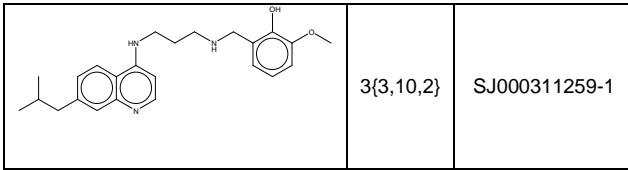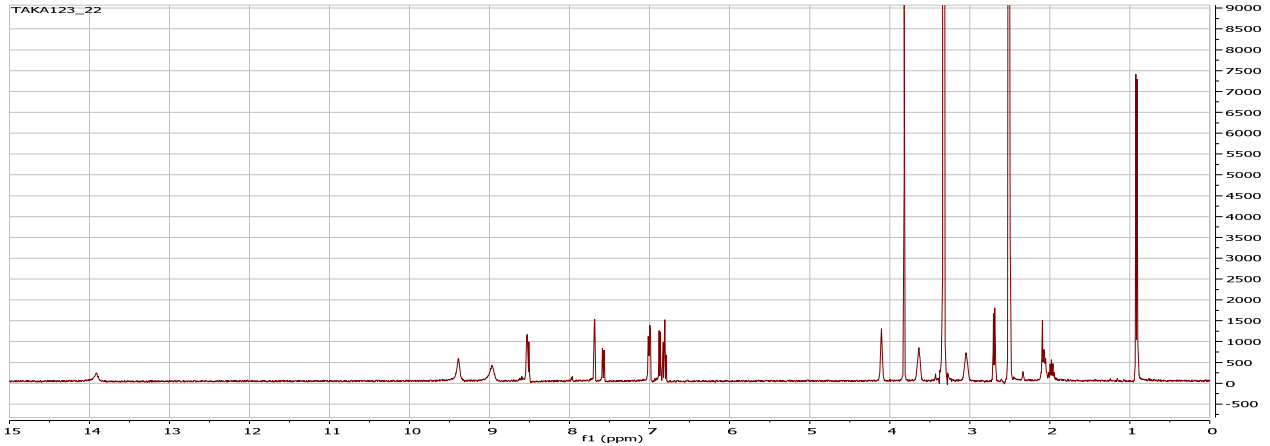

2: UV Detector: TIC

2.774e+2 (2) ELSD Signal

1169.406

Range: 2.774e+2

Range: 1169.348

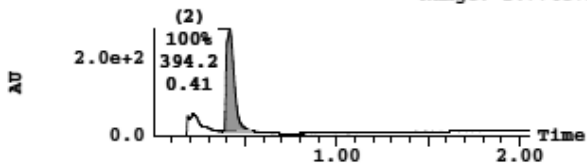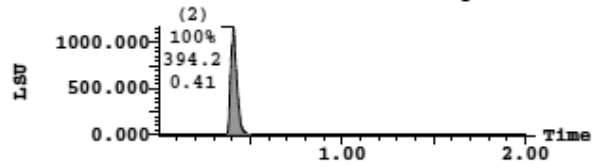

| Peak ID | Compound | Time | Mass Found |
|---------|----------|------|------------|
| 2       | Found    | 0.39 | 394.24     |

1:MS ES+  
9.0e+007

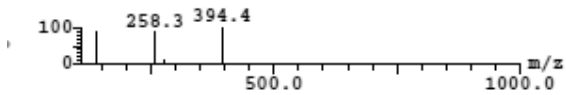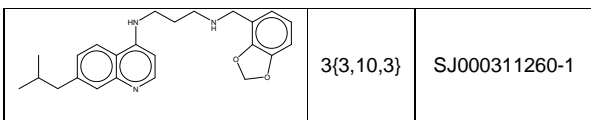

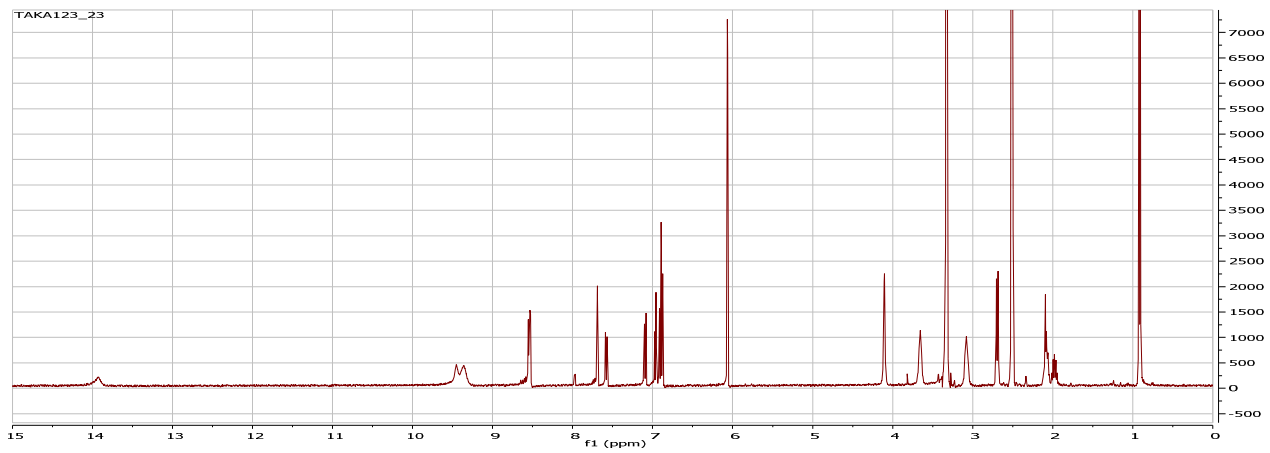

2: UV Detector: TIC

2.931e+2  
Range: 2.931e+2

(2) ELSD Signal

1260.165  
Range: 1260.039

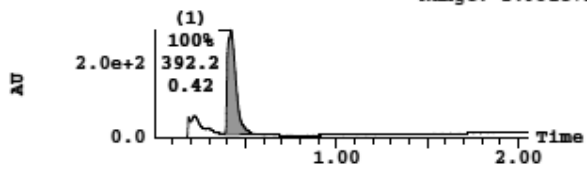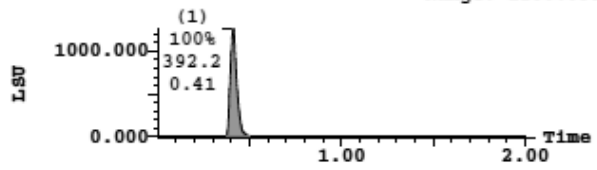

| Peak ID | Compound | Time | Mass Found |
|---------|----------|------|------------|
| 1       | Found    | 0.40 | 392.23     |

1:MS ES+  
1.1e+008

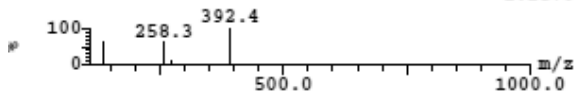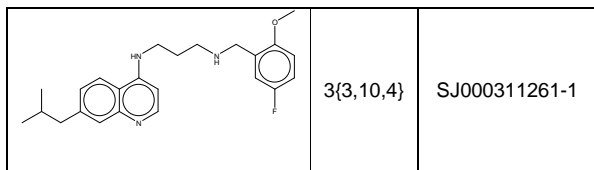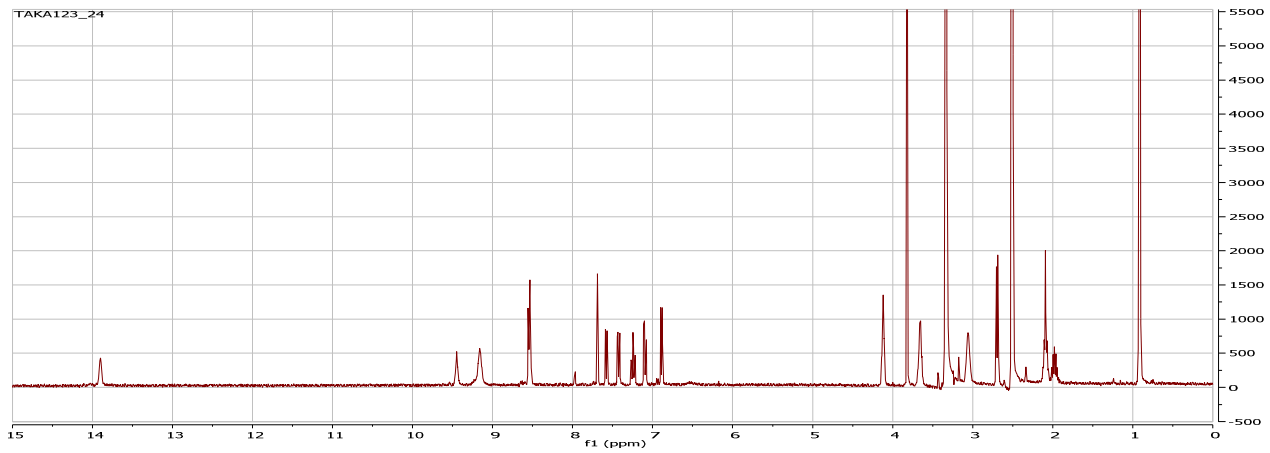

2: UV Detector: TIC 2.624e+2  
Range: 2.624e+2

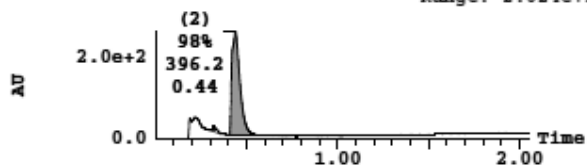

(2) ELSD Signal 989.276  
Range: 989.088

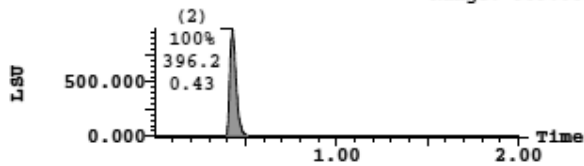

| Peak ID | Compound | Time | Mass Found |
|---------|----------|------|------------|
| 2       | Found    | 0.42 | 396.24     |

1:MS ES+  
9.4e+007

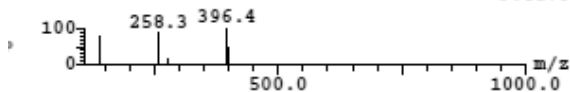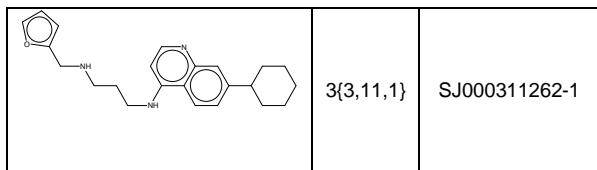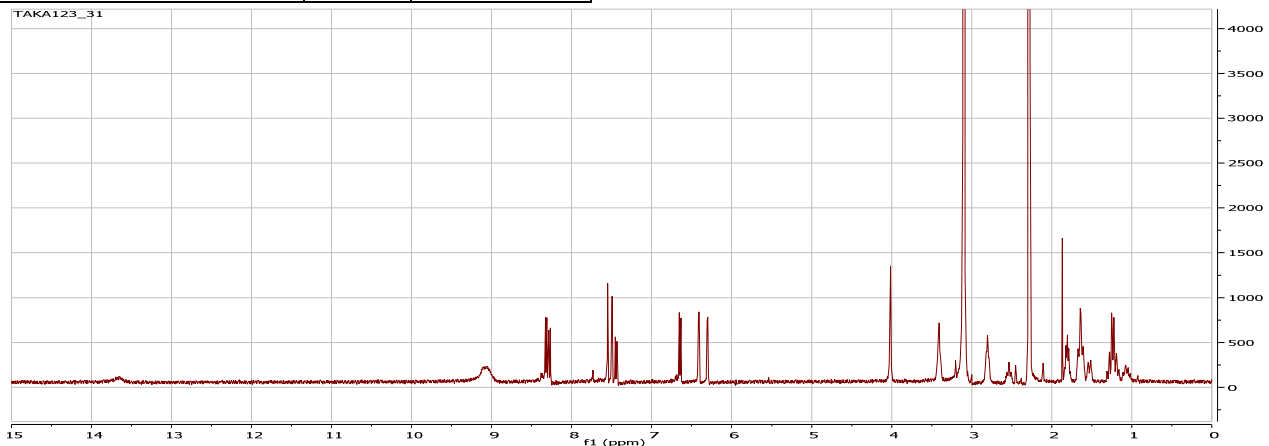

2: UV Detector: TIC 2.509e+2  
Range: 2.509e+2

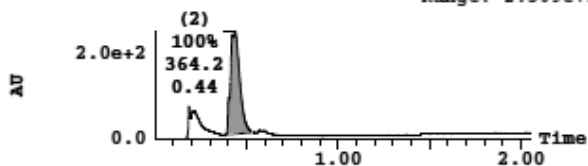

(2) ELSD Signal 889.250  
Range: 889.196

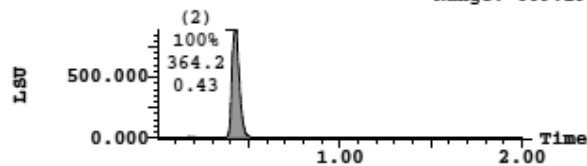

| Peak ID | Compound | Time | Mass Found |
|---------|----------|------|------------|
| 2       | Found    | 0.40 | 364.23     |

1:MS ES+  
8.5e+007

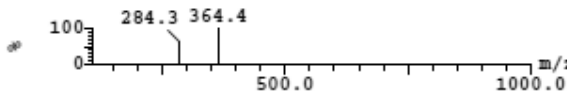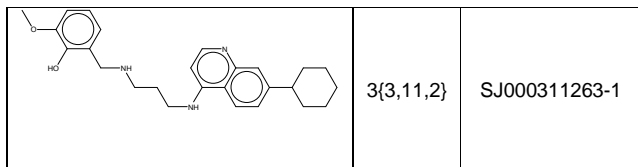

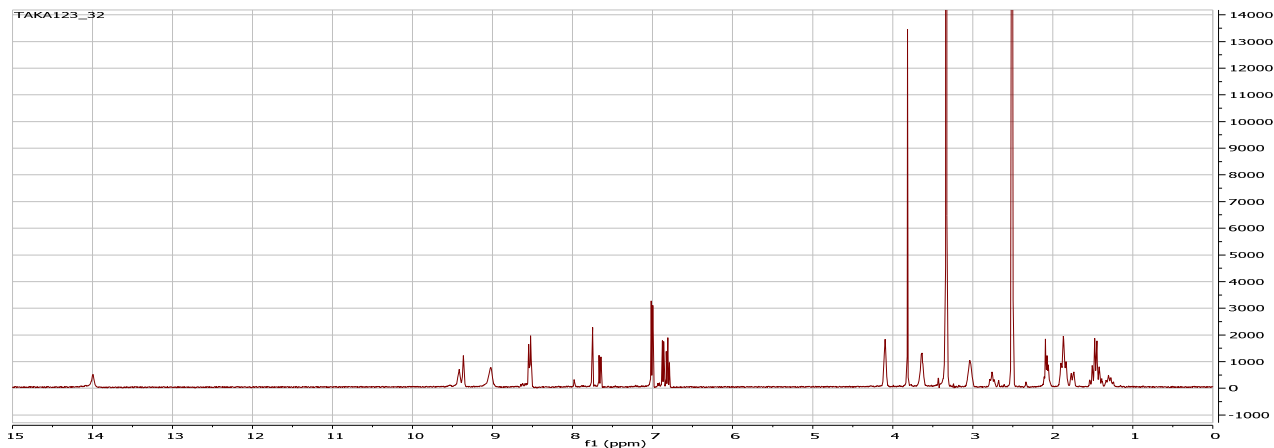

2: UV Detector: TIC

2.227e+2  
Range: 2.227e+2

(2) ELSD Signal

699.130  
Range: 699.047

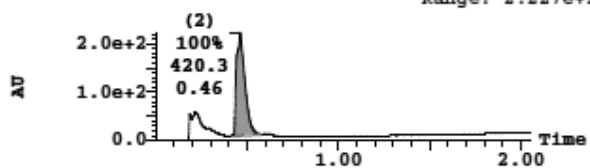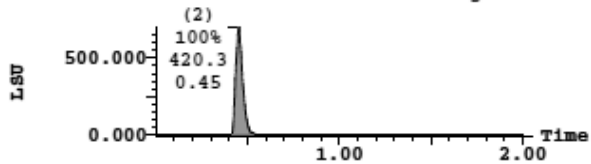

| Peak ID | Compound | Time | Mass Found |
|---------|----------|------|------------|
| 2       | Found    | 0.44 | 420.28     |

1:MS ES+  
8.6e+007

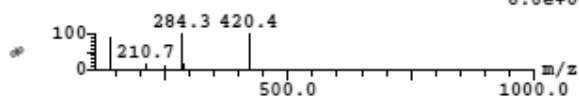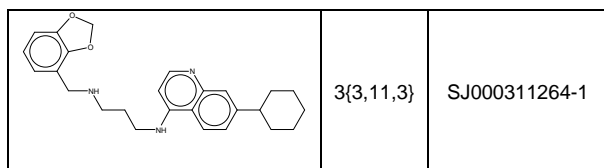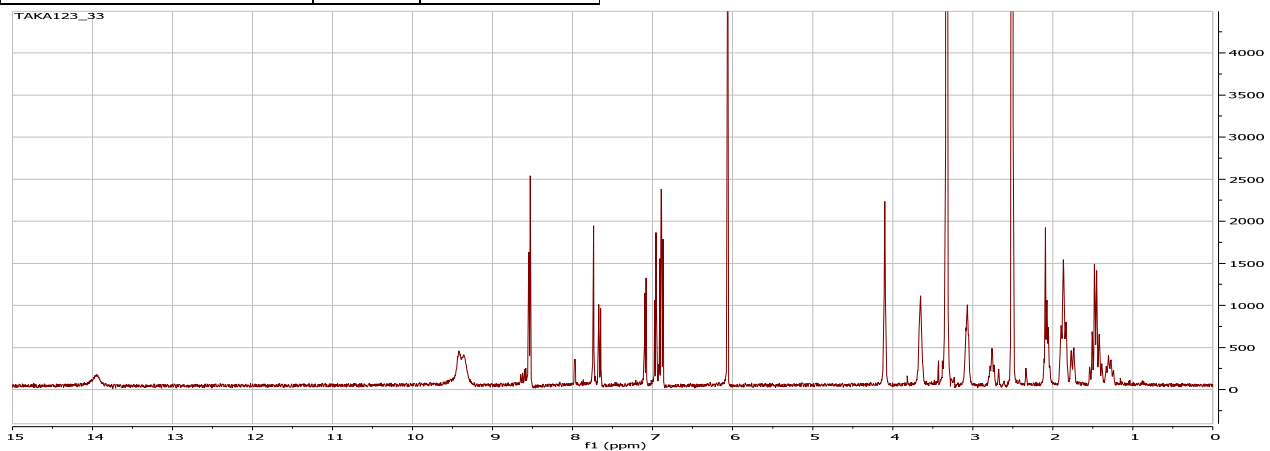

2: UV Detector: TIC

2.412e+2  
Range: 2.412e+2

(2) ELSD Signal

811.696  
Range: 811.672

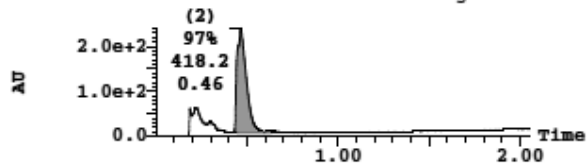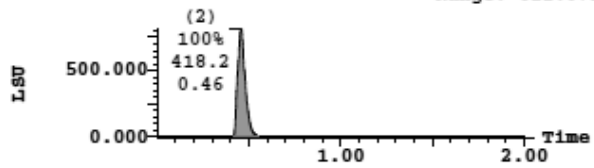

| Peak ID | Compound | Time | Mass Found |
|---------|----------|------|------------|
| 2       | Found    | 0.45 | 418.24     |

1:MS ES+  
1.1e+008

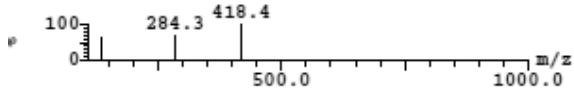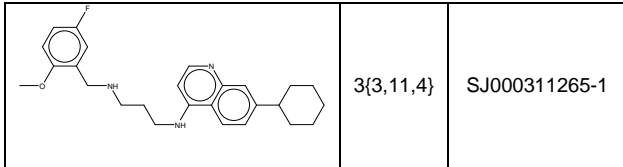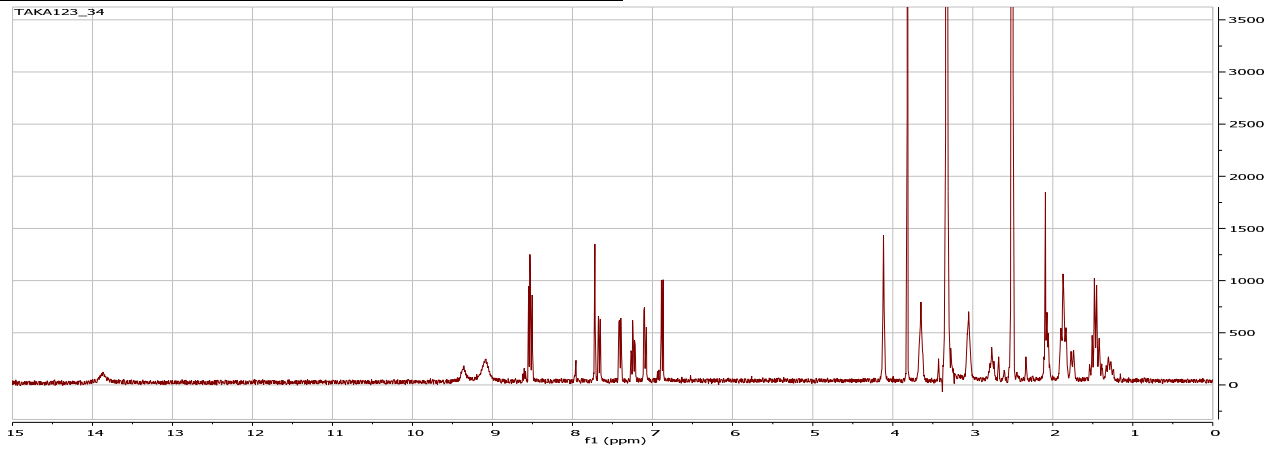

2: UV Detector: TIC

2.342e+2  
Range: 2.342e+2

(2) ELSD Signal

747.114  
Range: 747.106

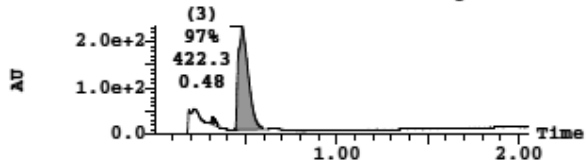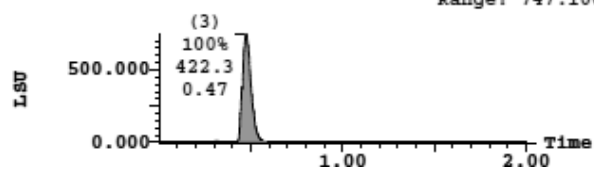

| Peak ID | Compound | Time | Mass Found |
|---------|----------|------|------------|
| 3       | Found    | 0.46 | 422.25     |

1:MS ES+  
1.0e+008

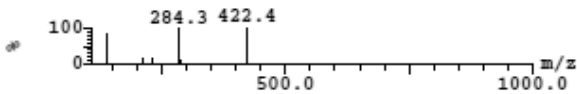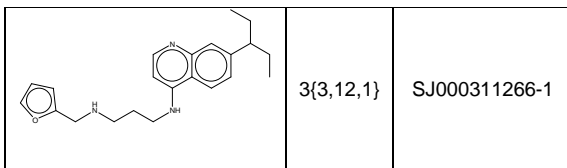

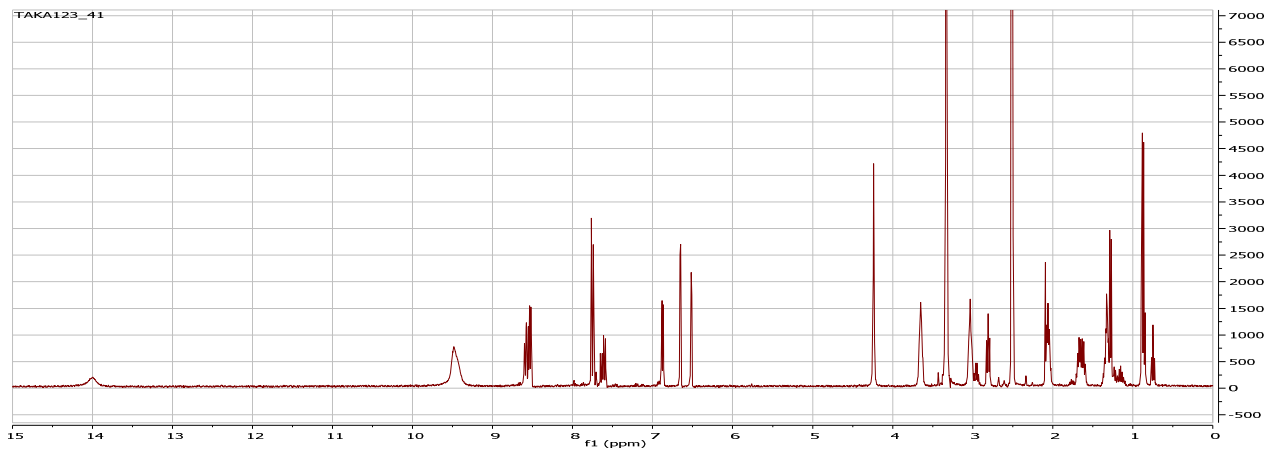

2: UV Detector: TIC

2.275e+2  
Range: 2.275e+2

(2) ELSD Signal

642.522  
Range: 642.471

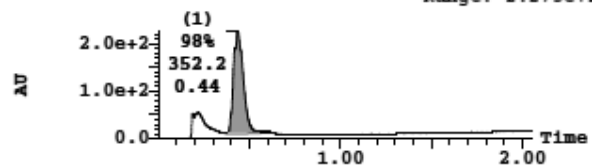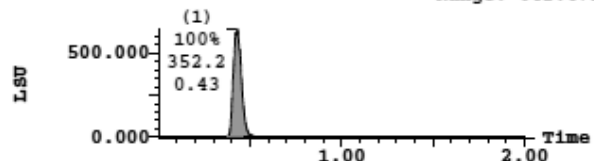

| Peak ID | Compound | Time | Mass Found |
|---------|----------|------|------------|
| 1       | Found    | 0.40 | 352.23     |

1:MS ES+  
8.8e+007

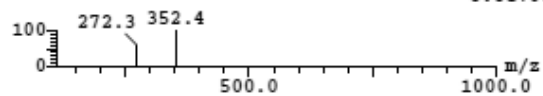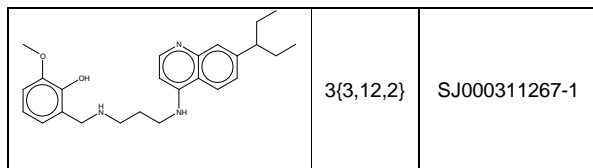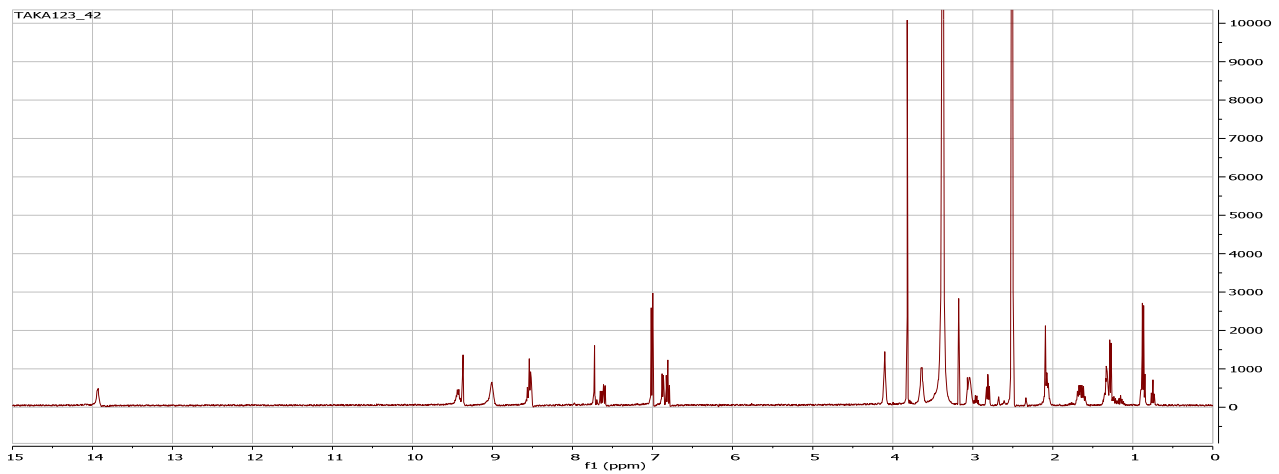



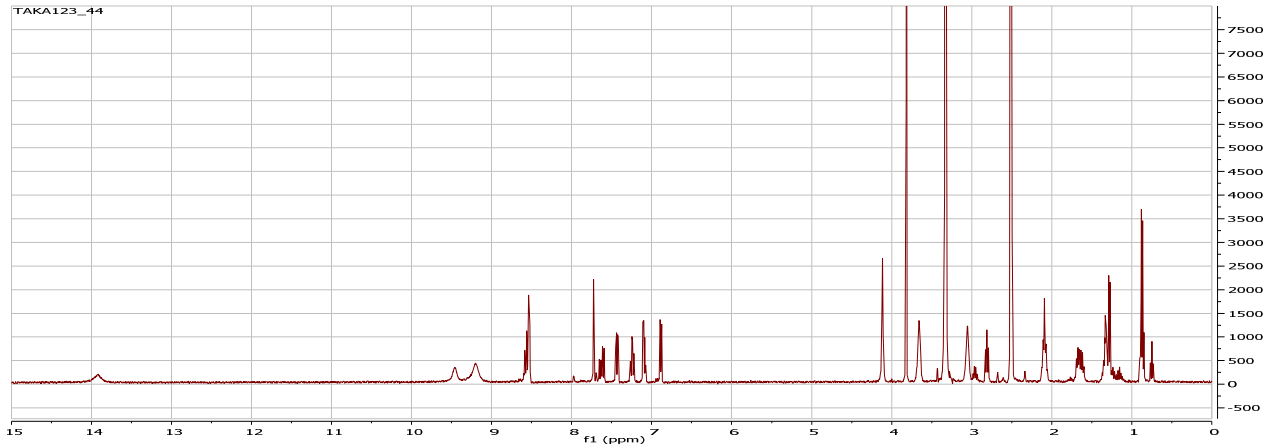

2: UV Detector: TIC

2.236e+2  
Range: 2.236e+2

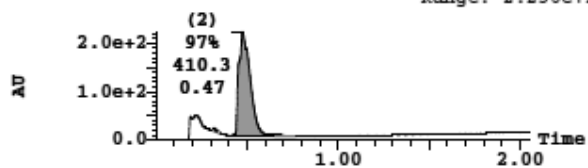

(2) ELSD signal

679.680  
Range: 679.660

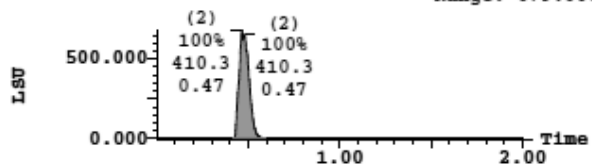

| Peak ID | Compound | Time | Mass Found |
|---------|----------|------|------------|
| 2       | Found    | 0.46 | 410.25     |

1:MS ES+  
1.1e+008

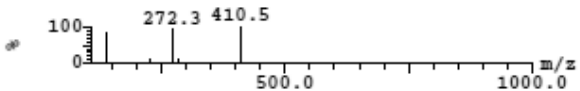

Supplement: NIHMS475009-supplement-001.pdf [file NIHMS475009-supplement-001.pdf]
